# Cadherin switch marks germ layer formation in the diploblastic sea anemone *Nematostella vectensis*

PUKHLIYAKOVA, E.A.<sup>1</sup>, KIRILLOVA, A.O.<sup>1,2,3</sup>, KRAUS, Y.A.<sup>2</sup>, ZIMMERMANN, B.<sup>1</sup>, TECHNAN, U.<sup>1\*</sup>

<sup>1</sup> Department for Molecular Evolution and Development, Centre of Organismal Systems Biology, University of Vienna, Althanstraße 14, A-1090 Vienna, Austria.

<sup>2</sup> Department of Evolutionary Biology, Biological Faculty, Moscow State University, Leninskie Gory 1/12, 119991, Moscow, Russia.

<sup>3</sup> present address: Federal State Budget Institution “National Medical Research Center for Obstetrics, Gynecology and Perinatology named after Academician V.I. Kulakov of the Ministry of Healthcare of Russian Federation”, st. Academician Oparin 4, 117513, Moscow, Russia.

\*Author for correspondence: ulrich.technau@univie.ac.at

Key words: cadherin, cell adhesion, morphogenesis, germ layers, *Nematostella*, Cnidaria

## Abstract

Morphogenesis is a shape-building process during development of multicellular organisms. During this process the establishment and modulation of cell-cell contacts play an important role. Cadherins, the major cell adhesion molecules, form adherens junctions connecting epithelial cells. Numerous studies in Bilateria have shown that cadherins are associated with the regulation of cell differentiation, cell shape changes, cell migration and tissue morphogenesis. To date, the role of Cadherins in non-bilaterians is unknown. Here, we study the expression and the function of two paralogous classical cadherins, cadherin1 and cadherin3, in the diploblastic animal, the sea anemone *Nematostella vectensis*. We show that a cadherin switch is accompanying the formation of germ layers. Using specific antibodies, we show that both cadherins are localized to adherens junctions at apical and basal positions in ectoderm and endoderm. During gastrulation, partial EMT of endodermal cells is marked by a step-wise down-regulation of cadherin3 and up-regulation of cadherin1. Knockdown experiments show that both cadherins are required for maintenance of tissue integrity and tissue morphogenesis. Thus, both sea anemones and bilaterians use independently duplicated cadherins combinatorially for tissue morphogenesis and germ layer differentiation.

## Introduction

Morphogenesis is a process of tissue and organ formation during organism development (Gilbert, 2013), driven by coordinated cell shape changes, cell migration, cell proliferation and cell death and cell adhesion. The key morphogenetic events during early development are gastrulation and germ layer formation, folding of the neural tube and body axis elongation. Cadherins are transmembrane cell adhesion molecules, which play an important role in these processes. They do not only provide the mechanical connection between cells, but also control cell-cell recognition, cell sorting, tissue boundary formation, signal transduction, formation of cell and tissue polarity, cell migration, cell proliferation and cell death (Gumbiner, 2005; Halbleib and Nelson, 2006). In adult tissues, cadherins preserve stable and ordered tissue integrity (Angst et al., 2001; Halbleib and Nelson, 2006).

Classical cadherins are conserved molecules present in all animals whose genomes have been analyzed (Alberts, 2007). They are major components of the adherens junctions between cells, which are conserved structures of epithelial cells in most animals (Meng and Takeichi, 2009). In adherens junctions, cadherins form homophilic (more rarely heterophilic), calcium dependent interactions with other cadherin molecules from neighboring cells. The cytoplasmic domain of cadherins is highly conserved among metazoans, distinguishing classical cadherins from other cadherin subfamilies (Hulpiau and van Roy, 2011; Oda and Takeichi, 2011). It contains  $\beta$ -catenin and p120 binding sites, which connect catenins with the actin cytoskeleton in a dynamic manner (Meng and Takeichi, 2009). In comparison with other cadherin subfamilies, classical cadherins are unique by showing the most noticeable variation in their extracellular region among different species (Hulpiau and van Roy, 2011). Indeed, the extracellular domain consists of a variable number of cadherin repeats of about 110 amino-acids each, and - depending on the species - the presence of laminin G and EGF-like domains.

During development, the regulation of specific cadherin expression correlates with the formation of new tissues. For instance, the folding of the neural tube in vertebrates occurs in parallel with down-regulation of epithelial cadherin (E-cadherin) and up-regulation of neuronal cadherin (N-cadherin) (Nandadasa et al., 2009). Such cadherin switches are characteristic of several different morphogenetic processes, for example, during gastrulation

and neural crest development (Basilicata et al., 2016; Dady et al., 2012; Detrick et al., 1990; Giger and David, 2017; Hatta and Takeichi, 1986; Pla et al., 2001; Rogers et al., 2013; Scarpa et al., 2015; Schäfer et al., 2014; Shoval et al., 2007). During mesoderm formation of *Drosophila*, *Dme\_E-cadherin* becomes replaced by *Dme\_N-cadherin* (Oda et al., 1998), similar to the switch from E- to N-cadherin during mesoderm formation in chicken (Hatta and Takeichi, 1986). It has also been shown that N-cadherin expression triggers active endodermal cell migration, which leads to the cell segregation and germ layer formation (Ninomiya et al., 2012). Moreover, a cadherin switch allows efficient Wnt, BMP and FGF signaling, required for proper mesoderm differentiation in both fruitfly and mouse (Basilicata et al., 2016; Giger and David, 2017; Ninomiya et al., 2012; Schäfer et al., 2014). For example, N-cadherin can interact with the FGF receptor and modulate the signaling pathway (Francavilla et al., 2009; Williams et al., 1994). Therefore, accurate control of the expression of cadherin is important for proper cell movements during gastrulation, like epiboly, or convergence and extension of the tissue during axis elongation (Babb and Marrs, 2004; Basilicata et al., 2016; Shimizu et al., 2005; Winklbauer, 2012).

While the role of cadherins has been studied in model bilaterian species, very little is known in diploblastic organisms, such as cnidarians. Most of our knowledge on cell adhesion molecules in cnidarians is restricted to genome analyses (Hulpiau and van Roy, 2009; Hulpiau and van Roy, 2011; Tucker and Adams, 2014) or biochemical studies (Clarke et al., 2016). The sea anemone *Nematostella vectensis* has become one of the prime model organisms for embryonic development during the last two decades (Genikhovich and Technau, 2009a; Layden et al., 2016; Technau and Steele, 2011). A bioinformatic analysis of the available genome sequence of *Nematostella vectensis* (Putnam et al., 2007) revealed 16 different cadherins from all main groups of the cadherin superfamily (classical, flamingo, FAT, dachsous, FAT-like, protocadherins and cadherin-related proteins) (Hulpiau and van Roy, 2011). It has been shown that adherens junctions in *Nematostella* ultrastructurally resemble those in bilaterians (Fritzenwanker et al., 2007). However, the molecular composition of these junctions has not yet been described, and a recent report questioned the presence of adherens junctions in the inner layer of *Nematostella* (Salinas-Saavedra et al., 2018).

Germ layers are formed in *Nematostella* by invagination of the endoderm at the animal pole (Kraus and Technau, 2006; Magie et al., 2007). However, whether classical cadherins play a role in germ layer formation of a non-bilaterian is not known. Here, we show that classical

cadherins of *Nematostella*, Cadherin1 (Cdh1) and Cadherin3 (Cdh3), form the adherens junctions of the epithelium of both germ layers. Germ layer differentiation in *Nematostella* is marked by a cadherin switch, where Cdh3 is down-regulated in the inner, endodermal layer, while Cdh1 is up-regulated and remains the only cadherin expressed in the endoderm. Unexpectedly, we found that in addition to apical adherens junctions both Cdh1 and Cdh3 are also involved in cell junctions between cells on the basal-lateral side. Knockdown experiments of *cdh1* and *cdh3* indicate important roles of cadherins in cell adhesion and tissue morphogenesis of this diploblastic metazoan.

## Results

### Structure of classical cadherins of *Nematostella vectensis*

Three genes encoding classical cadherins have been predicted in the genome of *Nematostella vectensis* – *cadherin1*, *cadherin2*, *cadherin3* (*cdh1*, *cdh2*, *cdh3*) (Hulpiau and van Roy, 2011). However our analysis of the *cadherin2* gene model showed that it is a fusion of two separate gene models for which we have no evidence of its complete transcription. *cdh2* is not detectable by *in situ* hybridization. Furthermore, the hallmarks of the cadherin intracellular domain are absent. Therefore, *cdh2* may be either a pseudogene or the result of an incorrect assembly. Hence, this gene model is not further investigated here.

Hulpiau and van Roy predicted 25-32 EC repeats for *Nematostella* cadherins (Hulpiau and van Roy, 2011). However, in a recent publication, two cadherins with 14 and 30 EC repeats, respectively, were reported (Clarke et al., 2016). We cloned both *cadherin1* and *cadherin2* in overlapping fragments of 2-3kb length, resulting in full-length cDNA clones of >13 kb, predicting a protein size of about 480 kDa for both cadherins. The protein model suggest a structure similar to classical cadherins, composed of a typical intracellular domain with binding sites for  $\beta$ -catenin and p-120, and a large extracellular domain consisting of three EGF-like and two interspaced Laminin G domains, followed by 31 (*cdh1*) or 32 (*cdh3*) extracellular (EC) repeats. This is similar to the original model of Hulpiau and van Roy (Fig. 1) and we therefore follow their gene terminology. By comparison, fruit fly cadherin has 17 EC repeats, and chick cadherin has 13 EC repeats, mouse cadherin has only 5 EC repeats (Hulpiau and van Roy, 2011).



We also interrogated the genomes and transcriptomes of several other cnidarians and found that all investigated cnidarian cadherins have 30-32 EC domains and the EGF/Laminin domains in the extracellular part. Notably, corals and hydrozoans have only a single classical cadherin while the sea anemones underwent a lineage-specific gene duplication (Fig. 1; Fig. S1). Mammals have lost the extracellular EGF and LamG domains and have retained only a few EC domains (Hulpiau and van Roy, 2011). Interestingly, platypus has several paralogs of the short version with no EGF/LamG domains, typical for mammals, but also one classical cadherin with EGF/LamG domains and many EC domains, like other non-mammals. This suggests that an ancestral "long" cadherin gene duplicated in the ancestor of placental mammals and platypus and one of the duplicates underwent a drastic loss of EC and EGF/LamG domains. Platypus has kept both versions, while other mammals have retained only duplicates of the short classical cadherin version.

### **Expression of classical cadherins is highly dynamic during early development of *Nematostella***

To characterize the pattern of classical cadherin expression during normal development, *in situ* hybridization has been performed on developmental stages from early cleavage through adult polyp. *cdh3* is maternally expressed at significant levels, which are detectable at the earliest cleavage stages. *cdh3* is then strongly expressed in all cells starting from the egg until gastrula stage (Fig. 2A-D,M). During early gastrulation *cdh3* expression is decreased in the presumptive endoderm (Fig. 2B,C), and completely down-regulated in the endoderm by the planula stage (Fig. 2B-E).

By comparison, *cdh1* expression could not be detected by *in situ* hybridization until early gastrula stage (Fig. 2G-I), although RNAseq data suggest that it also maternally expressed at lower levels (Casper et al., 2018). During gastrulation *cdh1* expression first appears and intensifies in the pre-endodermal plate (Fig. 2H,I). At late gastrula stage *cdh1* starts being expressed in the aboral ectoderm and then expands orally during planula development (Fig. 2J,K). Interestingly, at the late planula stage, the strongest *cdh1* expression is detected in the endoderm and in the subpopulation of ectodermal cells, which give rise to a sensory apical organ (Fig. 2K).

In primary polyp, *cdh3* expression remains strongly expressed in the tentacles and in the pharynx and weakly in the body-wall ectoderm (Fig. 2F). Interestingly, *cdh3* in juveniles and adults is detectable only in the ectoderm of the pharynx and tentacles, ciliated tract, septal filaments and developing eggs, with hardly any expression in the body-wall ectoderm (Fig. S2A,B). Almost complementary to that, *cdh1* is expressed both in the ectoderm and endoderm, but it is completely excluded from the ectoderm of the pharynx and tentacles (Fig. 2L). In juveniles, *cdh1* is expressed in the endoderm and body-wall ectoderm, but not in the ectoderm of most of the pharynx. Interestingly, the part of the pharynx carrying siphonoglyph and the ciliary tract below the pharynx specifically expresses low levels of *cdh1* (Fig. S2C-H). In adults, *cdh1* is expressed in the body-wall endoderm and in small oogonia (Fig. 2N; Fig. S2I).

### **Cdh3 is the main component of adherens junctions during cleavage and gastrulation**

We wished to visualize the subcellular localization of Cdh3 protein during development. We generated specific polyclonal and monoclonal antibodies against two recombinant fragments of Cdh1 and three peptides of Cdh3, respectively (Fig. S3). All antibodies against the different fragments and peptides consistently showed the same pattern for Cdh1 and Cdh3, respectively (Fig. S4; Materials and Methods) (Madeira et al., 2019). Immunocytochemistry experiments were carried out at all stages of development. Cdh3 protein is already accumulated at the apical cell junctions at the first cell divisions, suggesting a role in establishing early cell polarity. It is also detectable in less confined areas at the lateral contacts between cells (Fig. 3A-C). Interestingly, cells maintain their polarity during cell divisions. In contrast to the Par system proteins (Ragkousi et al., 2017; Salinas-Saavedra et al., 2018) Cdh3 stays localized at the apical cell junctions at different cell cycle stages (Fig. 4). It is possible that the polarized Cdh3 at the junctions may guide the Par system proteins during their transient loss of polarity during cell division. Later, during blastoderm formation, apical cell junctions become more pronounced (Fig. 3D-F). Strikingly, we found that Cdh3 also localizes on the basal-lateral side of the cells (Fig. 3D-L), in addition to the apical localization. Ultrastructural analysis by transmission electron microscopy revealed that the cell-cell junctions at the basal side resemble the adherens junctions at the apical side (Fig. 3M,N). However, during blastula stage, asynchronously dividing cells lose transiently the basal-lateral localization of Cdh3 (Fig. 3E, a yellow star), similar to the early cleavage stage,

when cells are synchronously dividing (Fig. 3B,C; Fig. 4). Thus, *Nematostella* has a unique epithelium, where cells form cell-cell contacts on both apical and basal sides. These Cdh3-positive junctions develop before any contact to an endodermal layer or presence of the mesoglea, the extracellular matrix of Cnidaria. This is remarkable, and has to our knowledge not been described in any other animal. Interestingly, as the pre-endodermal plate (PEP) starts to invaginate and the cells adopt a partial EMT phenotype, Cdh3 disappears from the basal junctions of the invaginating cells (Fig. 3G,H,I). Meanwhile, ectodermal cells of the blastoderm retain both apical and basal cell contacts. As the pre-endodermal cells lose basal junctions, its epithelium becomes less rigid and columnar. Pre-endodermal cells form filopodia and become more motile on the basal side (Fig. 3O). This event is possibly one of the crucial steps of the incomplete EMT, which pre-endodermal cells undergo during gastrulation (Kraus and Technau, 2006; Salinas-Saavedra et al., 2018). Notably, apical cell junctions expressing Cdh3 are preserved in the pre-endodermal cells during the course of gastrulation (Fig. 3J-L).

After the invagination process is completed, Cdh3 fully disappears from the cell junctions of the endoderm, concordant with the decrease of mRNA expression in the whole endoderm. Cdh3 remains expressed exclusively in the ectoderm, forming apical and basal cell junctions (Fig. 5A-E). Notably, while the boundary between ectoderm and endoderm is very difficult to discern by morphological criteria, Cdh3 localization at the cell junctions in the pharynx precisely marks the boundary between the last ectodermal and the first endodermal cell (Fig. 5B,E). At the polyp stage Cdh3 remains exclusively expressed in the ectoderm, with especially strong expression in the pharynx and the tentacles (Fig. 5F,G).

### **Cdh1 protein expression marks a cadherin switch during endoderm formation**

After completion of gastrulation, Cdh1 protein forms pronounced cellular junctions. At early planula larva Cdh1 localizes to the apical and basal junctions of the endoderm (Fig. 6A-D). Hence, the formation of the endoderm is marked by a cadherin switch from Cdh3 to Cdh1.

It should be noted, though, the transcriptome data suggest some maternal deposition of *cdh1* in the embryo, even though *in situ* hybridization does not detect *cdh1* till the late gastrula stage. Indeed, the anti-Cdh1 antibody detects a fuzzy signal beneath the apical cell membrane in all cells at the early gastrula stage, which might be maternal Cdh1 protein that has not yet localized to the cell junctions.

In addition to endodermal expression, Cdh1 is strongly expressed in the apical organ ectoderm and then expands into a wider domain in the aboral ectoderm, where Cdh1 and Cdh3 are co-expressed (Fig. 6). At the ectodermal surface, expression of the Cdh1 decreases along a gradient towards the oral pole (Fig. 6L). Interestingly, the ectodermal cell population that gives rise to the apical tuft is also different from the rest of the ectoderm in terms of cadherin expression. These cells lose Cdh3 basal junctions, while keeping the apical junctions (Fig. 5C). This specific arrangement may be connected with the special function of these cells (Fig. S5). Indeed, the loss of Cdh3 expression in the ectodermal apical tuft cells goes hand in hand with an up-regulation of Cdh1 in these cells (Fig. 2K; Fig. 6A,C).

We have demonstrated that Cdh3 is the major component of adhesion complexes during cleavage and gastrulation and is present in all cells until late gastrula stage. Cdh3 forms apical and basal cell junctions in the blastodermal epithelium, which during invagination of the pre-endodermal plate disappear from basal cell junctions of the future endoderm. Further endoderm differentiation leads to the complete Cdh3 to Cdh1 replacement. Therefore, there is a distinct boundary between ectoderm and endoderm which is defined by Cdh1 / Cdh3 localization.

### **Cdh3 in apical ectodermal junctions co-localize with $\beta$ -catenin**

A recent biochemical study showed that the intracellular domain of the classical cadherins can form a ternary complex with  $\alpha$ -catenin and  $\beta$ -catenin (Clarke et al., 2016). To explore further the molecular composition of the cadherin cell junctions, we co-stained the embryos with the antibody against Cdh3 and with the previously described for *Nematostella* antibody against  $\beta$ -catenin (Leclère et al., 2016; Salinas-Saavedra et al., 2018). At blastula stage Cdh3 is co-localized with  $\beta$ -catenin at the apical junctions whereas basal junctions do not show such pronounced co-localization (Fig. 7A-C; G-I). Interestingly, at planula stage  $\beta$ -catenin was detected only in the body wall ectoderm but neither in the ectodermal pharynx nor the endoderm (Fig. 7D-F; Fig. S6). These results could mean that not all the cell contacts of *Nematostella* epithelium contain  $\beta$ -catenin, in line with other recent findings (Salinas-Saavedra et al., 2018). This is surprising, as no ultrastructural differences in the junctions of endoderm and ectoderm could be detected (Fig. S7).

## Function of classical cadherins in early development

To examine the function of cadherins we performed knockdown experiments using morpholinos and shRNA. First, we injected independently two non-overlapping translation blocking *cdh3* morpholinos (MO). However, we could still detect Cdh3 in apical and basal cell junctions in the whole mount MO injected embryos (Fig. 8). Indeed, on the ultrastructural level, the adherens cell junctions looked similar in morphants and in control embryos (Fig. 8C,G; 7D,H). These results can be explained by the significant maternal deposition mRNA and protein. However, development of Cdh3 morphants was arrested after gastrula stage, presumably due to the block of translation of zygotically expressed *cdh3*. As a result, when Cdh3 protein becomes limited, post-gastrula embryos are unable to develop further (Fig. 8A,B).

The mild knockdown effect on the presence of Cdh3 in the junctions also suggests that there is relatively little turnover in established junctions. Therefore, to assess the function of Cdh3 in establishing new cell junctions we used an aggregate assay. *Nematostella* gastrulae can be dissociated into single cells and small clusters and can be re-aggregated by centrifugation into the cell aggregates (Kirillova et al., 2018). We followed the establishment of cell contacts and the formation of the epithelium in the developing cell aggregates (Fig. 9). Dissociated cells do not show any signs of polarization: Cdh3 is not localized to any side (Fig. 9C). Only 30 min after re-aggregation, Cdh3 becomes localized to the apical side of the outer cells of the aggregate and the first signs of epithelialization become apparent (Fig. 9E,F,M). 12 hours after re-aggregation the outer epithelial layer is completely formed and Cdh3 is localized at the apical and basal cell junctions (Fig. 9H,I). 24 hours after re-aggregation two epithelial layers – ectoderm and endoderm are formed (Kirillova et al., 2018). Both cell layers possess basal and apical cadherin cell junctions (Fig. 9K,L,S). Cdh1 starts being expressed in both ectoderm and endoderm at 24 hours of aggregate development (Fig. 9N,Q,T,W). Similar to the normal embryo, ectoderm expresses both Cdh1 and Cdh3, while endoderm expresses exclusively Cdh1 (Fig. 9U,X).

To address the question how Cdh3 down-regulation influences the establishment of new cell contacts in the aggregate, we dissociated an equal amount of *cdh3* MO injected gastrulae and standard MO injected gastrulae as a control. The first difference we observed was that the size of the aggregates from *cdh3* morphant cells was significantly smaller than control

aggregates ( $p < 0.0001$ ) (Fig. 10M-O). Moreover, aggregates from *cdh3* morpholino injected embryos start falling apart into cells immediately after re-aggregation (Fig. 10; Movies 1,2). Cdh3 knockdown in the aggregate at the protein level was shown by immunostaining (Fig. 10I,J). Ultrastructural imaging with TEM confirmed that cells in Cdh3 MO aggregates do not form well-defined subapical adherens junctions, while in the control aggregate cell contacts are well developed (Fig. 10K,L). Interestingly, cells in the Cdh3 MO aggregates make lamella-like protrusions extending to the neighboring cell on the apical surface (Fig. 10K). These results show that *cdh3* knockdown impairs the *de novo* formation of the cell contacts, although it does not affect the earlier established contacts built from the maternal protein.

To further explore the role of Cdh1 protein, we down-regulated *cdh1* using an independent approach, shRNA-mediated knockdown (He et al., 2018). As in MO knockdown, shRNA knockdown leads to the significant decrease of the Cdh1 protein as assayed by immunohistochemistry (Fig. S8; Fig. 11). Although early development including gastrulation appears largely unaffected, in the subsequent planula stage, mesenteries do not form upon *cdh1* knockdown. In all MO and shRNA injected embryos mesenteries were absent or impaired, while there are eight mesenteries developed in all control embryos at this stage (Fig. 11; Fig. 12D,H).

Besides the predominant expression in the endoderm, *cdh1* is also expressed in the apical tuft region of the ectoderm (Fig. 2K). Interestingly, *cdh1* knockdown abolishes expression of *FGFa1*, which is responsible for apical organ development (Rentzsch et al., 2008). In most *cdh1* MO injected embryos the apical organ does not form and there is lack of *FGFa1* expression (Fig. 12). These results suggest that Cdh1 is crucial for morphogenesis and differentiation of the endoderm as well as the development of the apical organ.

## Discussion

### *Evolution and structure of cadherins*

Although proteins with cadherin domains are present in choanoflagellates, cadherins with intracellular catenin binding domains are an important class of cell adhesion molecules that arose only in metazoans (Nichols et al., 2012). They are mediating not only cell adhesion between epithelial cells, but are strongly involved in the differentiation of specific cell types. Recently, cadherins have been shown to also convey mechanotransduction, i.e. the activation

of gene expression to the nucleus upon mechanical stress, which in *Drosophila* and *Nematostella* is mediated by  $\beta$ -catenin (Lyer et al., 2019; Pukhlyakova et al., 2018; Röper et al., 2018). However, most studies on the role of cadherins have been carried out in bilaterian model organisms like mouse or *Drosophila*. Here, we show the localization and function of both classical cadherins in a representative of the Cnidaria, the sea anemone *Nematostella vectensis*. The phylogenetic analysis suggests that sea anemone have duplicated an ancestral classical cadherin, while corals and hydrozoans have retained a single copy. The two investigated *cadherin* genes code for large proteins with 31-32 EC domains each, largely confirming previous predictions from the genome (Hulpiau and van Roy, 2011) and gene models based on our transcriptome assembly (Fredman et al., 2013). This significantly extends the structure of the recently published gene model for Cdh3 (termed Cad1 in (Clarke et al., 2016)). Thus, cnidarians as well as other non-bilaterians have substantially larger classical cadherins than most bilaterians and their extracellular domain structure is reminiscent of the FAT-like proteins (Hulpiau and van Roy, 2009; Hulpiau and van Roy, 2011). It will be interesting to determine which extracellular domains are engaged in homophilic or heterophilic interactions.

#### *Cadherins are localized to apical and basal junction in both germ layers*

Interestingly, both cadherins localize to apical junctions as well as to basal cell-cell junctions in the epithelial cells of both ectoderm and endoderm (Fig. 13A). Electron and confocal microscopy analyses show actin filaments attaching to the junction, suggesting that these are adherens junctions (Fig. 3G,N; Fig. 8D,H). This is in contrast to a recent study, which claimed that the endodermal epithelium does not contain adherens junctions, since neither Par complex components nor  $\beta$ -catenin could be detected (Salinas-Saavedra et al., 2018). Yet, in line with this study (Salinas-Saavedra et al., 2018), we could detect  $\beta$ -catenin in the apical adherens junctions and weakly in the basal junction of the ectoderm, but not in the pharyngeal ectoderm and the endoderm (Fig. 7; Fig. S6). This could indicate that the basal junctions in the ectoderm and all endodermal junctions are qualitatively different. However, apical adherens junctions in the ectoderm and endoderm have a very similar structure on the ultrastructural level (Fig. S7). As we observe co-localized actin fibers at these junctions, we assume that either another protein replaces  $\beta$ -catenin or  $\beta$ -catenin is simply not detected at these junctions. Indeed, we note that the antibody also fails to stain nuclear  $\beta$ -catenin after early cleavage stages. Therefore, as a cautionary note, we cannot fully rule out that the failure



to stain  $\beta$ -catenin in the pharynx and the endoderm is due to technical reasons.

While to our knowledge the basal-lateral junctions involving specific cadherins has not been described in other animals yet, more fuzzy basal-lateral localization of cadherins has been observed in other systems. For instance, the midgut epithelium of *Drosophila* shows a basal-lateral localization of a cadherin (Chen et al., 2018), albeit much less defined as described here for *Nematostella*.

Basal junctions might be an innovation of Cnidaria and can play a crucial role in morphogenesis of the epithelium. The formation of the basal junctions can be connected to the special properties and functions of the cnidarian epithelium. For example, in Hydra epithelia are composed of the multifunctional epithelia-muscular cells. These cells form basal myonemes, connected between the neighboring cells by the desmosomal-like junctions (Seybold et al., 2016). These basal connections can be associated with the contractile actin bundles and can be used for the increased synchronized contractile activity within large epithelia sheets. Basal cellular contractions have also a major contribution in the process of the bud formation in Hydra (Holz et al., 2017). Such basal contacts are absent from bilaterian embryos, which are mainly connected by apical junction belts.

#### *Cadherin and formation of epithelia*

The establishment of the adherens junctions is crucial for normal development of the embryo. Knockdown of *cdh3* in normal embryos does not lead to a dissociation of the embryonic tissue, suggesting that maternally expressed cadherin protein, localized in cell junctions might have a slow turnover and be sufficient for the early stages of development. This is consistent with knockdown of E-Cadherin in mouse embryos (Capaldo and Macara, 2007). However, proper formation of epithelial layers is disrupted in embryonic aggregates upon knockdown of *cdh3*. Notably, while knockdown of the endodermal *cdh1* does not disrupt gastrulation itself, the endoderm does not develop endodermal structures, such as mesenteries. Thus, proper development of the inner germ layer is dependent on the expression of Cdh1.

### *The role of cadherins in germ layer formation*

The role of cadherins in the formation of germ layers in a diploblast animal is of particular interest, as we might learn about the evolution and potential homology of germ layers. We find that the formation of the inner layer is accompanied by a step-wise cadherin switch. At the blastula stage, Cdh3 forms apical and basal adherens junctions. The onset of gastrulation is characterized by a change of shape of the endodermal cells, which adopt a partial EMT phenotype: They apically constrict, lose the Cdh3-positive basal junctions, the nucleus migrates basally, the cells develop filopodia and become rather motile (Fig. 13B). We propose that the changes in the adhesion properties of the endodermal cells are crucial for the morphogenetic behavior and further differentiation. In a second step, after completion of invagination, Cdh3 also disappears from the apical junctions in the endoderm and is replaced by Cdh1 both at apical and basal junctions of the endoderm. Thus, we observe a cadherin switch in *Nematostella* that is analogous to the cadherin switch in vertebrates and insects. As *cdh1* and *cdh3*, like E- and N-cadherins in mammals and insects are lineage-specific duplications (Fig. 1), we conclude that the cadherin switch evolved convergently in these animals.

However, while Cdh3 is not expressed in the endoderm after the gastrula stage, Cdh1 shows partially overlapping expression with Cdh3 in the ectoderm. Cdh1 seems to form a decreasing gradient from aboral to oral, but the significance of this gradient is unclear at this point. Notably, the oral region and tentacles are completely devoid of Cdh1 expression. Interestingly, *cdh1* knock down does not disrupt oral patterning. For example, the expression of the blastopore marker *brachyury* was normal. However the expression of the aboral patterning gene *FGFa1* was abolished. Since the aboral part is an area of strong Cdh1 expression, we assume, that normal Cdh1 expression is necessary for FGF signaling and apical organ development. Our results show that *Nematostella* cadherins are important for germ layer morphogenesis and the maintenance of tissue integrity . However, so far we have no evidence that cadherins play role in initial germ layer differentiation, as shown similarly for the knock-down of  $\alpha$ -catenin, another component of the adhesion junction complex (Clarke et al., 2019). We conclude that like in bilaterians (Basilicata et al., 2016; Giger and David, 2017; Huang et al., 2016; Nakagawa and Takeichi, 1998; Pla et al., 2001; Schäfer et al., 2014; Shoval et al., 2007), different combinations and concentrations of Cdh1 and Cdh3 convey different tissue properties and identities in different regions of the developing

embryo. Thus, the combinatorial and differential use of cadherins is a recurring feature of metazoans (Fig. 1; Fig. S1; Fig. 13C), although the paralogous molecules have evolved independently.

Interestingly, our phylogenetic analysis of the classical cadherins showed that hydrozoans and stony corals have only cadherin protein, which groups basally with two classical cadherins of sea anemones, suggesting that *cdh1* and *cdh3* arose by a lineage-specific gene duplication within the sea anemones (Fig.1). The expression and function of the single cadherin in other cnidarians is unknown. However, they do have a *dachsous* gene, which also encodes a cytoplasmic cadherin domain and has a similar structure as classical cadherins, except that they lack the EGF/LamininG domains found in most invertebrate cadherins. It remains to be shown whether Dachsous and classical cadherin could interact during early germ layer formation in other cnidarians.

#### *Homology of germ layers*

Our study has established that cadherins play an important role in the formation and differentiation of the germ layers in a diploblastic animal. This revives the question to which germ layers in Bilateria these two cell layers are homologous. Traditionally, they have been homologized with endoderm and ectoderm, with the mesoderm missing. The identification of a number of mesodermal transcription factors in cnidarians and their expression in the endoderm led to the notion of an inner "mesendoderm" (Fritzenwanker et al., 2004; Kumburegama et al., 2011; Martindale, 2004; Salinas-Saavedra et al., 2018; Scholz and Technau, 2003). However, a recent analysis of many endodermal and mesodermal marker genes has suggested that segregation has already taken place in the *Nematostella* polyp. In fact, the inner layer rather corresponds to mesoderm, while all endodermal functions reside in the ectodermally derived extensions of the pharynx, the septal filaments (Hashimshony, 2017; Steinmetz et al., 2017). In the light of those new findings, it is interesting to note that *Cdh1* is specific to the inner cell layer, which would correspond to the mesoderm of bilaterians. Notably, this cell layer also expresses the zinc finger transcription factor *snailA* (Fritzenwanker et al., 2004; Martindale, 2004). Snail proteins regulate the downregulation of *E-cadherin* in vertebrates and insects in the ingressing mesoderm (Nieto, 2002). In line with this, *snail* genes appear to play a role in regulating invagination and partial EMT in *Nematostella* (Salinas-Saavedra et al., 2018). It will be of interest to investigate how the cadherins are regulated by Snail in *Nematostella*.

## *Conclusion:*

This first analysis of the expression and function of classical cadherins in a diploblast shows that these molecules play a conserved role in cell adhesion, tissue morphogenesis and germ layer specification during embryogenesis. The invaginating cells show partial EMT, accompanied by a cadherin switch. The evolutionarily recurring mechanism of a cadherin switch suggests that the evolution of germ layer formation and tissue morphogenesis was facilitated by the differential expression of cadherins.

## **Material and Methods:**

### **Animals and embryo culturing**

Animals were kept in artificial seawater at 18°C the dark. Spawning was induced by temperature shift to 24°C and light exposure over 10 hours (Fritzenwanker and Technau, 2002). In vitro fertilized embryos were collected and kept at 21°C as described (Fritzenwanker and Technau, 2002; Genikhovich and Technau, 2009c).

### **Identification of Cdh1 and Cdh3 protein sequences**

To retrieve the coding sequences of *cdh1* and *cdh3* genes the 1-3Kb overlapping coding fragments of *cdh1* and *cdh3* were amplified from cDNA of mixed embryonic stages, cloned using pJet1.2/blunt vector system (ThermoFisher Scientific) and sequenced. The full-length sequences of Cadherin1 and Cadherin3 have been deposited at Genbank (accession numbers MK253651 and MK253652).

Assembled *cdh1* and *cdh3* protein coding sequences were derived *in silico* using ExPASy translation tool (Artimo et al., 2012). Cadherin protein domain annotation was performed using SMART protein domain annotation resource (Letunic and Bork, 2018).

### **Morpholino injection**

*cdh1* and *cdh3* knockdowns were performed by independent zygote injections of two non-overlapping translation blocking morpholinos (Gene Tools, LLC):

cdh1MO1 - 5' CCGGCCAGCACTCATTTTGTGGCTA 3';

cdh1MO2 - 5' ACCCGTGAGTTTAAAAACCCATAGC 3';

cdh3MO1 5' ACGAGTTGCGGTGAACGAAAATAAC 3';

*cdh3*MO2 5' TAGCAGAACCGTCCAGTCCCATATC 3' at concentration of 500  $\mu$ M.

Standard morpholino injection at 500  $\mu$ M was used as a control.

SdtMO – 5' CCTCTTACCTCAGTTACAATTTATA'

Non-overlapping morpholinos for *cdh1* and *cdh3* knockdown had similar phenotypes.

Injection equipment used: FemtoJet (Eppendorf), CellTram Vario (Eppendorf), micromanipulator (Narishige), needles were pulled from the glass capillaries type GB 100TF-10 (Science Products GmbH) with a micropipette puller (Sutter Instrument CO., Model P-97). We used holding capillaries from Eppendorf for the injection (Renfer et al., 2010).

### **Short hairpin RNA (shRNA) knockdown**

*cdh1* shRNA design and synthesis were performed as described (He et al., 2018). The following primers were used for *cdh1* shRNA synthesis:

*cdh1* shRNA F:

TAATACGACTCACTATAGAAGCGCGCTCAGGTAAATGTTTCAAGAGA

*cdh1* shRNA R:

AAGAAGCACGTTTCGGGTAAATGTTCTCTTGAAACATTTACCTGAGCGC

Purified shRNA was injected into zygotes at concentration of 500 ng/ $\mu$ l. As a negative control shRNA against mOrange was injected at 500 ng/ $\mu$ l. Uninjected embryos from the same batch were used as a control for injection. After the injection embryos were raised at 21°C.

### **Generation of Cdh1 and Cdh3 antibodies**

To generate antibodies against Cdh1 we expressed the protein domains *cdh1:domain1* (extracellular) and *cdh1:domain3* (intracellular) in *E.coli*. The fragment sequences were the following:

Cdh1 domain1 (extracellular):

NAPKDGSLLIIVNAYDGNFTGGVIGKPYQDDDFDGDENTYELNSQSPGSYFRVNEG  
NGDITAAPMIPMGEYNLKRVTTEKSDSPSTVTSSVRVLVRRIDKEAVDNGVAVEFTD  
MRKVG YFVGDYYKGFEDVLASTLGVPTGDIKIFSVQKAHDNGLAVVFFTVAAKDS  
YMPHWDVVSKLVDAKKPLESLGLKVSRLGMD

Cdh1 domain3 (intracellular):

RRPEPVVYADSTDTGHVHDNVRLYHDDGGGEEDNLGYDITKLMKYTYIETTIAPPS  
VAPSKASEDKISTSSDQPLLQGRPPDAVFGLTGKEPGPKMPKYMEGDDVGDFITTRV  
KITDREVFLAVDELHIYRYEGDDTDVD

The column-based affinity purified recombinant protein fragments were used for immunization. Specifically, the extracellular fragment was used for immunization of two rats (polyclonal Cdh1 antibodies 1 and 2) and the intracellular fragment was used for immunization of a rabbit (polyclonal Cdh1 antibody 3). All Cdh1 antibodies resulted in the same staining pattern (see Fig. S4). Cdh1 antibody2 was used for most experiments in this paper.

For visualization of Cdh3, monoclonal antibodies were produced in mice. The following peptides were used for immunization: SSSDRNRPPV (for Cdh3 antibody1); DEKDPPQFSQ (for Cdh3 antibody2). Both epitopes are located in the extracellular part of Cdh3 in the third and seventh cadherin repeats, respectively. Both antibody clones - Cdh3 antibody1 and Cdh3 antibody2 resulted in the same staining patterns (see Fig. S4). Cdh3 antibody2 was used for antibody staining in this paper.

### **Antibody and Phalloidin staining**

For Cdh1 antibody staining embryos were fixed for 1h at 4°C with Lavdovsky's fixative (3,7% formaldehyde (FA)/50% ethanol/4% acetic acid). For Cdh3 and  $\beta$ -catenin antibody and phalloidin staining embryos were fixed for 1h with 3,7% FA in PBS at 4°C. Primary polyps were relaxed prior the fixation in 0,1 M MgCl<sub>2</sub> in *Nematostella* medium for 10 min. After fixation, embryos were incubated on ice in ice cold acetone (chilled at -20°C) for 7 min followed by 5 washes with PBSTx 0,2% (PBS with 0,2% of TritonX-100).

Then embryos were incubated in blocking solution (20% sheep serum, 1% Bovine Serum Albumin (BSA) in PBSTx (0,2%) for 2h at room temperature (RT). Primary mouse anti-Cdh3 antibody (1:1000), rabbit  $\beta$ -catenin antibody (Sigma C2206, 1:500) (Leclère et al., 2016; Salinas-Saavedra et al., 2018) and/or rat/rabbit anti-Cdh1 antibodies (1:500) were diluted in blocking solution and incubated with the embryos overnight at 4°C, followed by washing in PBSTx 0,2% at RT (10x 10 minutes each) at RT. After incubation in blocking solution for 2 h at RT, embryos were placed in a secondary antibody solution: goat anti-mouse Alexa Fluor 568 antibodies (1:1000), goat anti-rat Alexa Fluor 488 antibodies (1:1000) and DAPI overnight at 4 °C. When fixed with FA, phalloidin Alexa Fluor 488 (1:30) (Thermo Fisher Scientific) was added to the secondary antibody solution, since phalloidin staining is not compatible with the Lavdovsky's fixation. Embryos were washed in PBSTx 0,2% at RT (10x 10 minutes each), infiltrated with Vectashield antifade mounting medium (Vector laboratories) at 4°C overnight. For  $\beta$ -catenin staining of the embryo sections, fixed embryos were embedded in 10% gelatine in PBS. Gelatine blocks were post-fixed in 3,7% FA in PBS overnight at 4°C and sectioned on a vibratome Leica VT 1200S. 50  $\mu$ m embryo sections were stained with  $\beta$ -catenin antibody, phalloidin and DAPI as described for the whole-mount embryos. Imaging was performed with Leica TCS SP5 DM-6000 confocal microscope.

### ***In situ* hybridization**

*In situ* hybridizations of embryos were conducted as previously described (Genikhovich and Technau, 2009b; Kraus et al., 2016). The following regions of the CDS of cadherins were used to produce the *in situ* hybridization probes: for *cdh1* (7054-9126bp); for *cdh3* (2728-5091bp). Adult animals and juveniles were relaxed for 20 min in 0,1M MgCl<sub>2</sub> solution in *Nematostella* medium followed by fixation and *in situ* hybridization as described (Steinmetz et al., 2017). After *in situ* hybridization embryos, adult and juvenile pieces were embedded in 10% gelatine in PBS. Gelatine blocks were post-fixed in 3,7% FA in PBS overnight at 4°C and sectioned on a vibratome Leica VT 1200S. Embryos and adult and juvenile 50  $\mu$ m sections were embedded in 80% glycerol and imaged with the Nikon Eclipse 80i compound microscope equipped with DIC optics and Zeiss AxioCam camera.



### **Time-lapse microscopy**

Time-lapse imaging was carried out with the use of a Nikon Eclipse 80i compound microscope. Pictures were taken Zeiss AxioCam camera. Time-lapse movies were made with the use of FIJI software (Schindelin et al., 2012).

### **Transmission electron microscopy (TEM)**

TEM was performed as previously described (Fritzenwanker et al., 2007).

### **Phylogenetic analysis**

The protein complements of *Mus musculus* (GRCm38) (Schneider et al., 2017) and *Drosophila melanogaster* (FB2018\_03) (Thurmond et al., 2019) were downloaded from Ensembl (Zerbino et al., 2018), *Strongylocentrotus purpuratus*, *Capitella teleta*, *Lottia gigantea* and *Tribolium castaneum* from Ensembl metazoan (Kersey et al., 2018), *Hydra vulgaris* and *Ornithorhynchus anatinus* from RefSeq at NCBI (O'Leary et al., 2016), *Acropora millepora* (PRJNA74409) (Moya et al., 2012), *Anemonia viridis* (PRJNA260824) (Rachamim et al., 2015), *Exaptasia pallida* (PRJNA386175) (Baumgarten et al., 2015), *Stylophora pistilata* (PRJNA281535) (Voolstra et al., 2017) from the Sequence Read Archive at NCBI (Leinonen et al., 2011), *Acropora digitifera* from marine genomics at OIST (Shinzato et al., 2011). Sequences were selected which had a significant domain hit ( $\text{domE} < 1 \times 10^{-5}$ ) to the Cadherin cytoplasmic Pfam family (PF01049) according to HMMER 3.2.1 (Finn et al., 2011). When multiple isoforms were present, the longest one was used. The genes were filtered against truncated and misassembled gene models manually. Sequences were aligned using MAFFT v7.307 in E-INS-i mode and a maximum of 1000 iterations of refinement (Katoh and Standley, 2013). The WAG+F+R6 model was determined as optimal by the Bayesian Information Criterion using ModelFinder (Kalyaanamoorthy et al., 2017). This was used to infer a maximum likelihood tree using IQTREE (Nguyen et al., 2015). Support values were determined with 1000 standard bootstrap replicates. Domain architectures were determined using standalone interproscan (Mitchell et al., 2019). Sequence, alignment files and Subtree files can be obtained upon request.

### **Analysis of the size of the cell aggregates**

50 Cdh3 morpholino (MO) embryos and 50 Std MO control embryos were dissociated into cells at the gastrula stage. Cell aggregates were generated by slow centrifugation as described (Kirillova et al., 2018) and photographed immediately after centrifugation. The size of the aggregates was analyzed with FIJI software. (FIJI/Image/Adjust/Threshold tool and FIJI/Analyze/Analyze particles). The threshold was set to 50. The experiment was repeated three times.

### **Image processing**

Images were processed and adjusted for brightness and contrast using FIJI software (Schindelin et al., 2012). Focus stacking of ISH images was done using Helicon Focus software (Helicon Soft Ltd, Kharkov, Ukraine). Images were cropped and assembled into the figures as well as schemes were made using Adobe Illustrator CS6 software (Adobe, San Jose, USA).

## Acknowledgements

We thank Eduard Renfer and Sarah Streinzer for cloning the cDNAs for the *in situ* probes of *cdh1* and *cdh3* and performing initial *in situ* hybridizations of these genes. We are very grateful to Prof. Bert Hobmayer for the fruitful discussions and Dr. Alison Cole for critical reading of the manuscript. We thank Rohit Dnyansagar for help to generate the phylogenetic tree and Boris Osadchenko for imaging some of the TEM samples. We thank Vienna Biocenter Facilities (VBCF) for support with recombinant cadherin protein generation and purification and the Core Facility for Cell Imaging and Ultrastructure Research of the University of Vienna (CIUS) for assistance. This work was funded by a Austrian Science Fund (FWF) grant to U.T. (P25993).

## Author contributions

E.P, U.T. conceived the study; E.P. and U.T. designed the experiments; E.P. performed the experiments; E.P. and A.K. performed the aggregate experiments; Y.K. and A.K. performed transmission electron microscopy imaging; B.Z. and E.P. performed statistical analysis of the aggregate sizes and phylogenetic analysis; E.P. and U.T. wrote the paper.

## References:

- Alberts, B.** (2007). *Molecular Biology of the Cell*. New York: Garland Science.
- Angst, B. D., Marcozzi, C. and Magee, A. I.** (2001). The cadherin superfamily: diversity in form and function. *J. Cell Sci.* **114**, 629–641.
- Artimo, P., Jonnalagedda, M., Arnold, K., Baratin, D., Csardi, G., de Castro, E., Duvaud, S., Flegel, V., Fortier, A., Gasteiger, E., et al.** (2012). ExPASy: SIB bioinformatics resource portal. *Nucleic Acids Res.* **40**, 597–603.
- Babb, S. G. and Marrs, J. A.** (2004). E-cadherin regulates cell movements and tissue formation in early zebrafish embryos. *Dev. Dyn.* **230**, 263–277.
- Basilicata, M. F., Frank, M., Solter, D., Brabletz, T. and Stemmler, M. P.** (2016). Inappropriate cadherin switching in the mouse epiblast compromises proper signaling between the epiblast and the extraembryonic ectoderm during gastrulation. *Sci. Rep.* **6**, 8263.
- Baumgarten, S., Simakov, O., Esherrick, L. Y., Liew, Y. J., Lehnert, E. M., Michell, C. T., Li, Y., Hambleton, E. A., Guse, A., Oates, M. E., et al.** (2015). The genome of *Aiptasia*, a sea anemone model for coral symbiosis. *Proc. Natl. Acad. Sci. U.S.A.* **112**, 11893–11898.
- Capaldo, C. T. and Macara, I. G.** (2007). Depletion of E-Cadherin Disrupts Establishment but Not Maintenance of Cell Junctions in Madin-Darby Canine Kidney Epithelial Cells. *Mol. Biol. Cell* **18**, 189–200.
- Casper, J., Zweig, A. S., Villarreal, C., Tyner, C., Speir, M. L., Rosenbloom, K. R., Raney, B. J., Lee, C. M., Lee, B. T., Karolchik, D., et al.** (2018). The UCSC Genome Browser database: 2018 update. *Nucleic Acids Res.* **46**, 762–769.
- Chen, J., Sayadian, A.-C., Lowe, N., Lovegrove, H. E. and St Johnston, D.** (2018). An alternative mode of epithelial polarity in the *Drosophila* midgut. *PLoS Biol* **16**. e3000041. <https://doi.org/10.1371/journal.pbio.3000041>.
- Clarke, D. N., Miller, P. W., Lowe, C. J., Weis, W. I. and Nelson, W. J.** (2016). Characterization of the Cadherin-Catenin Complex of the Sea Anemone *Nematostella vectensis* and Implications for the Evolution of Metazoan Cell-Cell Adhesion. *Mol. Biol. Evol.* **33**, 2016–2029.
- Clarke, D. N., Lowe, C. J. and James Nelson, W.** (2019). The cadherin-catenin complex is necessary for cell adhesion and embryogenesis in *Nematostella vectensis*. *Dev. Biol.* **447**, 170-181.
- Dady, A., Blavet, C. and Duband, J.-L.** (2012). Timing and kinetics of E- to N-cadherin switch during neurulation in the avian embryo. *Dev. Dyn.* **241**, 1333–1349.
- Detrick, R. J., Dickey, D. and Kintner, C. R.** (1990). The Effects of N-Cadherin

- Misexpression on Morphogenesis in *Xenopus* Embryos. *Neuron* **4**, 493–506.
- Finn, R. D., Clements, J. and Eddy, S. R.** (2011). HMMER web server: interactive sequence similarity searching. *Nucleic Acids Res.* **39**, 29–37.
- Francavilla, C., Cattaneo, P., Berezin, V., Bock, E., Ami, D., de Marco, A., Christofori, G. and Cavallaro, U.** (2009). The binding of NCAM to FGFR1 induces a specific cellular response mediated by receptor trafficking. *J. Cell. Biol.* **187**, 1101–1116.
- Fredman, D., Schwaiger, M., Rentzsch, F. and Technau, U.** (2013). *Nematostella vectensis* transcriptome and gene models v2.0. figshare. <https://doi.org/10.6084/M9.FIGSHARE.807696>.
- Fritzenwanker, J. H. and Technau, U.** (2002). Induction of gametogenesis in the basal cnidarian *Nematostella vectensis* (Anthozoa). *Dev. Genes Evol.* **212**, 99–103.
- Fritzenwanker, J. H., Genikhovich, G., Kraus, Y. and Technau, U.** (2007). Early development and axis specification in the sea anemone *Nematostella vectensis*. *Dev. Biol.* **310**, 264–279.
- Fritzenwanker, J. H., Saina, M. and Technau, U.** (2004). Analysis of forkhead and snail expression reveals epithelial–mesenchymal transitions during embryonic and larval development of *Nematostella vectensis*. *Dev. Biol.* **275**, 389–402.
- Genikhovich, G. and Technau, U.** (2009a). The Starlet Sea Anemone *Nematostella vectensis*: An Anthozoan Model Organism for Studies in Comparative Genomics and Functional Evolutionary Developmental Biology. *Cold Spring Harb. Prot.* **2009**, pdb.emo129–pdb.emo129.
- Genikhovich, G. and Technau, U.** (2009b). *In Situ* Hybridization of Starlet Sea Anemone (*Nematostella vectensis*) Embryos, Larvae, and Polyps. *Cold Spring Harb. Prot.* **2009**, prot5282.
- Genikhovich, G. and Technau, U.** (2009c). Induction of spawning in the starlet sea anemone *Nematostella vectensis*, *in vitro* fertilization of gametes, and dejellying of zygotes. *Cold Spring Harb. Prot.* **4**, prot5281.
- Giger, F. A. and David, N. B.** (2017). Endodermal germ-layer formation through active actin-driven migration triggered by N-cadherin. *Proc. Natl. Acad. Sci.* **114**, 10143–10148.
- Gilbert, S. F.** (2013). *Developmental Biology*, MA: Sinauer Associates, Inc., Sunderland.
- Gumbiner, B. M.** (2005). Regulation of cadherin-mediated adhesion in morphogenesis. *Nat. Rev. Mol. Cell Biol.* **6**, 622–634.
- Halbleib, J. M. and Nelson, W. J.** (2006). Cadherins in development: cell adhesion, sorting, and tissue morphogenesis. *Genes Dev.* **20**, 3199–3214.

- Hashimshony, T.** (2017). Cnidarians layer up. *Nat. Ecol. Evol.* **1**, 1429–1430.
- Hatta, K. and Takeichi, M.** (1986). Expression of N-Cadherin Adhesion Molecules Associated with Early Morphogenetic Events in Chick Development. *Nature* **320**, 447–449.
- He, S., Del Viso, F., Chen, C.-Y., Ikmi, A., Kroesen, A. E. and Gibson, M. C.** (2018). An axial Hox code controls tissue segmentation and body patterning in *Nematostella vectensis*. *Science* **361**, 1377–1380.
- Holz, O., Apel, D., Steinmetz, P., Lange, E., Hopfenmüller, S., Ohler, K., Sudhop, S. and Hassel, M.** (2017). Bud detachment in hydra requires activation of fibroblast growth factor receptor and a Rho-ROCK-myosin II signaling pathway to ensure formation of a basal constriction. *Dev. Dyn.* **246**, 502–516.
- Huang, C., Kratzer, M.-C., Wedlich, D. and Kashef, J.** (2016). E-cadherin is required for cranial neural crest migration in *Xenopus laevis*. *Dev. Biol.* **411**, 159–171.
- Hulpiau, P. and van Roy, F.** (2009). Molecular evolution of the cadherin superfamily. *Int. J. Biochem. Cell Biol.* **41**, 349–369.
- Hulpiau, P. and van Roy, F.** (2011). New Insights into the Evolution of Metazoan Cadherins. *Mol. Biol. Evol.* **28**, 647–657.
- Kalyaanamoorthy, S., Minh, B. Q., Wong, T. K. F., Haeseler, von, A. and Jermini, L. S.** (2017). ModelFinder: fast model selection for accurate phylogenetic estimates. *Nat. Meth.* **14**, 587–589.
- Katoh, K. and Standley, D. M.** (2013). MAFFT Multiple Sequence Alignment Software Version 7: Improvements in Performance and Usability. *Mol. Biol. Evol.* **30**, 772–780.
- Kersey, P. J., Allen, J. E., Allot, A., Barba, M., Boddu, S., Bolt, B. J., Carvalho-Silva, D., Christensen, M., Davis, P., Grabmueller, C., et al.** (2018). Ensembl Genomes 2018: an integrated omics infrastructure for non-vertebrate species. *Nucleic Acids Res.* **46**, 802–808.
- Kirillova, A., Genikhovich, G., Pukhlyakova, E., Demilly, A., Kraus, Y. and Technau, U.** (2018). Germ-layer commitment and axis formation in sea anemone embryonic cell aggregates. *Proc. Natl. Acad. Sci.* **115**, 1813–1818.
- Kraus, Y. and Technau, U.** (2006). Gastrulation in the sea anemone *Nematostella vectensis* occurs by invagination and immigration: an ultrastructural study. *Dev. Genes Evol.* **216**, 119–132.

- Kraus, Y., Aman, A., Technau, U. and Genikhovich, G.** (2016). Pre-bilaterian origin of the blastoporal axial organizer. *Nat. Commun.* **7**, 1–9.
- Kumburegama, S., Wijesena, N., Xu, R. and Wikramanayake, A. H.** (2011). Strabismus-mediated primary archenteron invagination is uncoupled from Wnt/b-catenin- dependent endoderm cell fate specification in *Nematostella vectensis* (Anthozoa, Cnidaria): Implications for the evolution of gastrulation. *EvoDevo* **2**, 2.
- Layden, M. J., Rentzsch, F. and Röttinger, E.** (2016). The rise of the starlet sea anemone *Nematostella vectensis* as a model system to investigate development and regeneration. *WIREs Dev. Biol.* **5**, 408–428.
- Leclère, L., Bause, M., Sinigaglia, C., Steger, J. and Rentzsch, F.** (2016). Development of the aboral domain in *Nematostella* requires  $\beta$ -catenin and the opposing activities of Six3/6 and Frizzled5/8. *Development* **143**, 1766–1777.
- Leinonen, R., Sugawara, H., Shumway, M. International Nucleotide Sequence Database Collaboration** (2011). The sequence read archive. *Nucleic Acids Res.* **39**, 19–21.
- Letunic, I. and Bork, P.** (2018). 20 years of the SMART protein domain annotation resource. *Nucleic Acids Res.* **46**, 493–496.
- Lyer, K. V., Piscitello-Gomez, R., Paijmans, J., Juelicher, F. and Eaton, S.** (2019). Epithelial Viscoelasticity Is Regulated by Mechanosensitive E-cadherin Turnover. *Curr. Biol.* **29**, 578–591.
- Madeira, F., Park, Y. M., Lee, J., Buso, N., Gur, T., Madhusoodanan, N., Basutkar, P., Tivey, A. R. N., Potter, S. C., Finn, R. D., et al.** (2019). The EMBL-EBI search and sequence analysis tools APIs in 2019. *Nucleic Acids Res.* **47**, 636–641.
- Magie, C. R., Daly, M. and Martindale, M. Q.** (2007). Gastrulation in the cnidarian *Nematostella vectensis* occurs via invagination not ingression. *Dev. Biol.* **305**, 483–497.
- Martindale, M. Q.** (2004). Investigating the origins of triploblasty: 'mesodermal' gene expression in a diploblastic animal, the sea anemone *Nematostella vectensis* (phylum, Cnidaria; class, Anthozoa). *Development* **131**, 2463–2474.
- Meng, W. and Takeichi, M.** (2009). Adherens junction: molecular architecture and regulation. *Cold Spring Harb. Perspec. Biol.* **1**, a002899–a002899.
- Mitchell, A. L., Attwood, T. K., Babbitt, P. C., Blum, M., Bork, P., Bridge, A., Brown, S. D., Chang, H.-Y., El-Gebali, S., Fraser, M. I., et al.** (2019). InterPro in 2019: improving coverage, classification and access to protein sequence annotations. *Nucleic Acids Res.* **47**, 351–360.



- Moya, A., Huisman, L., Ball, E. E., Hayward, D. C., Grasso, L. C., Chua, C. M., Woo, H. N., Gattuso, J.-P., Forêt, S. and Miller, D. J.** (2012). Whole transcriptome analysis of the coral *Acropora millepora* reveals complex responses to CO<sub>2</sub>-driven acidification during the initiation of calcification. *Mol. Ecol.* **21**, 2440–2454.
- Nakagawa, S. and Takeichi, M.** (1998). Neural crest emigration from the neural tube depends on regulated cadherin expression. *Development* **125**, 2963–2971.
- Nandadasa, S., Tao, Q., Menon, N. R., Heasman, J. and Wylie, C.** (2009). N- and E-cadherins in *Xenopus* are specifically required in the neural and non-neural ectoderm, respectively, for F-actin assembly and morphogenetic movements. *Development* **136**, 1327–1338.
- Nguyen, L.-T., Schmidt, H. A., Haeseler, von, A. and Minh, B. Q.** (2015). IQ-TREE: A Fast and Effective Stochastic Algorithm for Estimating Maximum-Likelihood Phylogenies. *Molecular Biology and Evolution* **32**, 268–274.
- Nichols, S. A., Roberts, B. W., Richter, D. J., Fairclough, S. R. and King, N.** (2012). Origin of metazoan cadherin diversity and the antiquity of the classical cadherin/ $\beta$ -catenin complex. *Proc. Natl. Acad. Sci. U.S.A.* **109**, 13046–13051.
- Nieto, M. A.** (2002). The Snail superfamily of zinc-finger transcription factors. *Nat. Rev. Mol. Cell Biol.* **3**, 155–166.
- Ninomiya, H., David, R., Damm, E. W., Fagotto, F., Niessen, C. M. and Winklbauer, R.** (2012). Cadherin-dependent differential cell adhesion in *Xenopus* causes cell sorting in vitro but not in the embryo. *J. Cell Sci.* **125**, 1877–1883.
- O'Leary, N. A., Wright, M. W., Brister, J. R., Ciuffo, S., Haddad, D., McVeigh, R., Rajput, B., Robbertse, B., Smith-White, B., Ako-Adjei, D., et al.** (2016). Reference sequence (RefSeq) database at NCBI: current status, taxonomic expansion, and functional annotation. *Nucleic Acids Res.* **44**, D733–45.
- Oda, H. and Takeichi, M.** (2011). Structural and functional diversity of cadherin at the adherens junction. *J. Cell Biol.* **193**, 1137–1146.
- Oda, H., Tsukita, S. and Takeichi, M.** (1998). Dynamic behavior of the cadherin-based cell-cell adhesion system during *Drosophila* gastrulation. *Dev. Biol.* **203**, 435–450.
- Pla, P., Moore, R., Morali, O. G., Grille, S., Martinozzi, S., Delmas, V. and Larue, L.** (2001). Cadherins in neural crest cell development and transformation. *J. Cell. Physiol.* **189**, 121–132.
- Pukhlyakova, E., Aman, A. J., Elsayad, K. and Technau, U.** (2018).  $\beta$ -Catenin-dependent mechanotransduction dates back to the common ancestor of Cnidaria and Bilateria. *Proc. Natl. Acad. Sci. U.S.A.* **115**, 6231–6236.

- Putnam, N. H., Srivastava, M., Hellsten, U., Dirks, B., Chapman, J., Salamov, A., Terry, A., Shapiro, H., Lindquist, E., Kapitonov, V. V., et al.** (2007). Sea Anemone Genome Reveals Ancestral Eumetazoan Gene Repertoire and Genomic Organization. *Science* **317**, 86–94.
- Rachamim, T., Morgenstern, D., Aharonovich, D., Brekhman, V., Lotan, T. and Sher, D.** (2015). The dynamically evolving nematocyst content of an anthozoan, a scyphozoan, and a hydrozoan. *Mol. Biol. Evol.* **32**, 740–753.
- Ragkousi, K., Marr, K., McKinney, S., Ellington, L. and Gibson, M. C.** (2017). Cell-Cycle-Coupled Oscillations in Apical Polarity and Intercellular Contact Maintain Order in Embryonic Epithelia. *Curr. Biol.* **27**, 1381–1386.
- Renfer, E., Amon-Hassenzahl, A., Steinmetz, P. R. H. and Technau, U.** (2010). A muscle-specific transgenic reporter line of the sea anemone, *Nematostella vectensis*. *Proc. Natl. Acad. Sci. U.S.A.* **107**, 104–108.
- Rentzsch, F., Fritzenwanker, J. H., Scholz, C. B. and Technau, U.** (2008). FGF signalling controls formation of the apical sensory organ in the cnidarian *Nematostella vectensis*. *Development* **135**, 1761–1769.
- Rogers, C. D., Saxena, A. and Bronner, M. E.** (2013). Sip1 mediates an E-cadherin-to-N-cadherin switch during cranial neural crest EMT. *J. Cell Biol.* **203**, 835–847.
- Röper, J.-C., Mitrossilis, D., Stirnemann, G., Waharte, F., Brito, I., Fernandez-Sanchez, M.-E., Baaden, M., Salamero, J. and Farge, E.** (2018). The major  $\beta$ -catenin/E-cadherin junctional binding site is a primary molecular mechano-transducer of differentiation in vivo. *eLife* **7**, 773.
- Salinas-Saavedra, M., Rock, A. Q. and Martindale, M. Q.** (2018). Germ layer-specific regulation of cell polarity and adhesion gives insight into the evolution of mesoderm. *eLife* **7**, 1438.
- Scarpa, E., Szabo, A., Bibonne, A., Theveneau, E., Parsons, M. and Mayor, R.** (2015). Cadherin Switch during EMT in Neural Crest Cells Leads to Contact Inhibition of Locomotion via Repolarization of Forces. *Dev. Cell* **34**, 421–434.
- Schäfer, G., Narasimha, M., Vogelsang, E. and Leptin, M.** (2014). Cadherin switching during the formation and differentiation of the *Drosophila* mesoderm - implications for epithelial-to-mesenchymal transitions. *J. Cell Sci.* **127**, 1511–1522.
- Schindelin, J., Arganda-Carreras, I., Frise, E., Kaynig, V., Longair, M., Pietzsch, T., Preibisch, S., Rueden, C., Saalfeld, S., Schmid, B., et al.** (2012). Fiji: an open-source platform for biological-image analysis. *Nat. Meth.* **9**, 676 EP —682.
- Schneider, V. A., Graves-Lindsay, T., Howe, K., Bouk, N., Chen, H.-C., Kitts, P. A., Murphy, T. D., Pruitt, K. D., Thibaud-Nissen, F., Albracht, D., et al.** (2017). Evaluation of GRCh38 and de novo haploid genome assemblies demonstrates the enduring quality of the reference assembly. *Genome Res.* **27**, 849–864.

- Scholz, C. B. and Technau, U.** (2003). The ancestral role of Brachyury: expression of *NemBra1* in the basal cnidarian *Nematostella vectensis* (Anthozoa). *Dev. Genes Evol.* **212**, 563–570.
- Seybold, A., Salvenmoser, W. and Hobmayer, B.** (2016). Sequential development of apical-basal and planar polarities in aggregating epitheliomuscular cells of Hydra. *Dev. Biol.* **412**, 148–159.
- Shimizu, T., Yabe, T., Muraoka, O., Yonemura, S., Aramaki, S., Hatta, K., Bae, Y.-K., Nojima, H. and Hibi, M.** (2005). E-cadherin is required for gastrulation cell movements in zebrafish. *Mech. Dev.* **122**, 747–763.
- Shinzato, C., Shoguchi, E., Kawashima, T., Hamada, M., Hisata, K., Tanaka, M., Fujie, M., Fujiwara, M., Koyanagi, R., Ikuta, T., et al.** (2011). Using the *Acropora digitifera* genome to understand coral responses to environmental change. *Nature* **476**, 320–323.
- Shoval, I., Ludwig, A. and Kalcheim, C.** (2007). Antagonistic roles of full-length N-cadherin and its soluble BMP cleavage product in neural crest delamination. *Development* **134**, 491–501.
- Steinmetz, P. R. H., Aman, A., Kraus, J. E. M. and Technau, U.** (2017). Gut-like ectodermal tissue in a sea anemone challenges germ layer homology. *Nat. Ecol. Evol.* **1**, 1535–1542.
- Technau, U. and Steele, R. E.** (2011). Evolutionary crossroads in developmental biology: Cnidaria. *Development* **138**, 1447–1458.
- Thurmond, J., Goodman, J. L., Strelets, V. B., Attrill, H., Gramates, L. S., Marygold, S. J., Matthews, B. B., Millburn, G., Antonazzo, G., Trovisco, V., et al.** (2019). FlyBase 2.0: the next generation. *Nucleic Acids Res.* **47**, 759–765.
- Tucker, R. P. and Adams, J. C.** (2014). Adhesion networks of cnidarians: a postgenomic view. *Int. Rev. Cell Mol. Biol.* **308**, 323–377.
- Voolstra, C. R., Li, Y., Liew, Y. J., Baumgarten, S., Zoccola, D., Flot, J.-F., Tambutté, S., Allemand, D. and Aranda, M.** (2017). Comparative analysis of the genomes of *Stylophora pistillata* and *Acropora digitifera* provides evidence for extensive differences between species of corals. *Sci. Rep.* **7**, 17583–14.
- Williams, E. J., FURNESS, J., WALSH, F. S. and DOHERTY, P.** (1994). Activation of the Fgf Receptor Underlies Neurite Outgrowth Stimulated by L1, N-Cam, and N-Cadherin. *Neuron* **13**, 583–594.
- Winklbauer, R.** (2012). Cadherin Function During *Xenopus* Gastrulation. In *Adherens Junctions: from Molecular Mechanisms to Tissue Development and Disease*, pp. 301–320. Dordrecht: Springer Netherlands.
- Zerbino, D. R., Achuthan, P., Akanni, W., Amode, M. R., Barrell, D., Bhai, J., Billis, K., Cummins, C., Gall, A., Girón, C. G., et al.** (2018). Ensembl 2018. *Nucleic Acids Res.* **46**, 754–761

## Figures

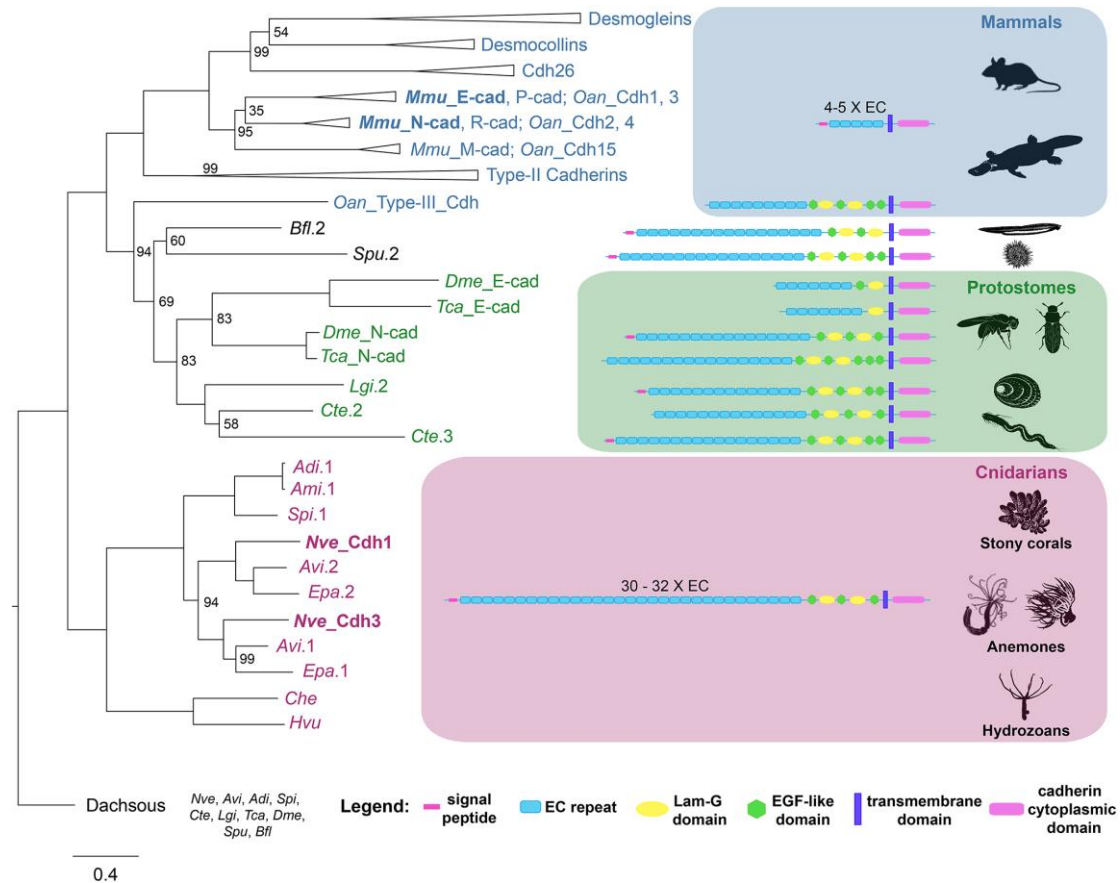

**Fig. 1. Maximum likelihood phylogenetic tree of classical and other cadherins.**

Sequences of all proteins containing a cytoplasmic cadherin domain were extracted from the genomes and transcriptomes of *Mus musculus* (*Mmu*), *Ornithorhynchus anatinus* (*Oan*), *Branchiostoma floridae* (*Bfl*), *Drosophila melanogaster* (*Dme*), *Tribolium castaneum* (*Tca*), *Capitella teleta* (*Cte*), *Lottia gigantea* (*Lgi*), *Nematostella vectensis* (*Nve*), *Anemone viridis* (*Avi*), *Exaiptasia pallida* (*Epa*), *Acropora millepora* (*Ami*), *Acropora digitifera* (*Adi*), *Stylophora pistillata* (*Spi*) *Clytia hemisphaerica* (*Che*), *Hydra vulgaris* (*Hvu*). Proteins with no annotation in their respective databases were assigned an arbitrary number. All gene names are based on the respective databases' annotations, except for *Oan* Type-III Cdh, *Nve* Cdh1 and *Nve* Cdh3, which were annotated based on the findings from Hulpiau and van Roy (2011). Dachsaus cadherin proteins, which also contain a cytoplasmic

cadherin domain, were used as an outgroup. The number at the nodes indicates the bootstrap support; nodes with no label have 100 % support. Domain organization is shown on the right. Some proteins lack a signal peptide. It is either an indication of a truncated protein (e.g. *Che*, *Avi*) or can be a result of assembly mistakes in a gene model.

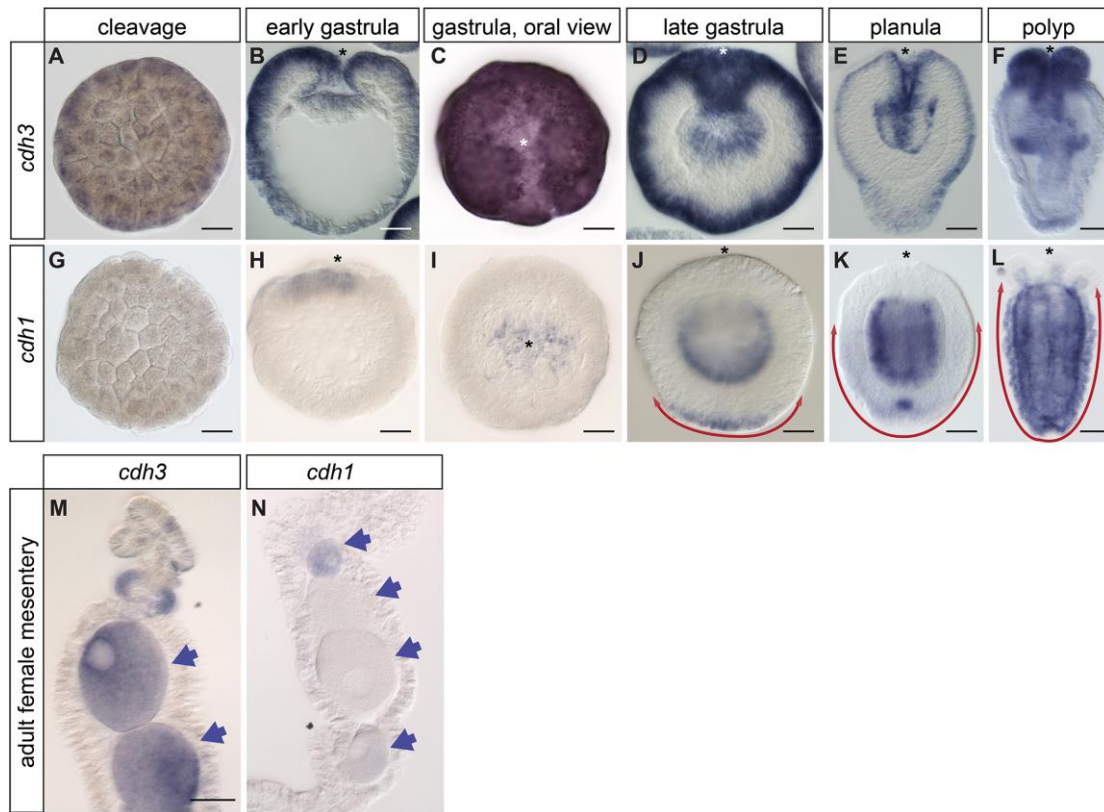

**Fig. 2. *cadherin3* and *cadherin1* expression is highly dynamic during early development and polyp growth.** (A, G) Cleavage. (B, H) Early gastrula, lateral section. C, I: Early gastrula, oral view. D, J: Late gastrula, lateral section. (E, K) Planula, lateral section. (F, L) Primary polyp. (M, N) Adult mesentery section. Double-headed arrows show an expansion of *cdh1* expression on the aboral pole. Arrows show the eggs. Asterisk indicates an oral pole. Scale bar (A-L) 50  $\mu\text{m}$ ; (M,N) 100  $\mu\text{m}$ .



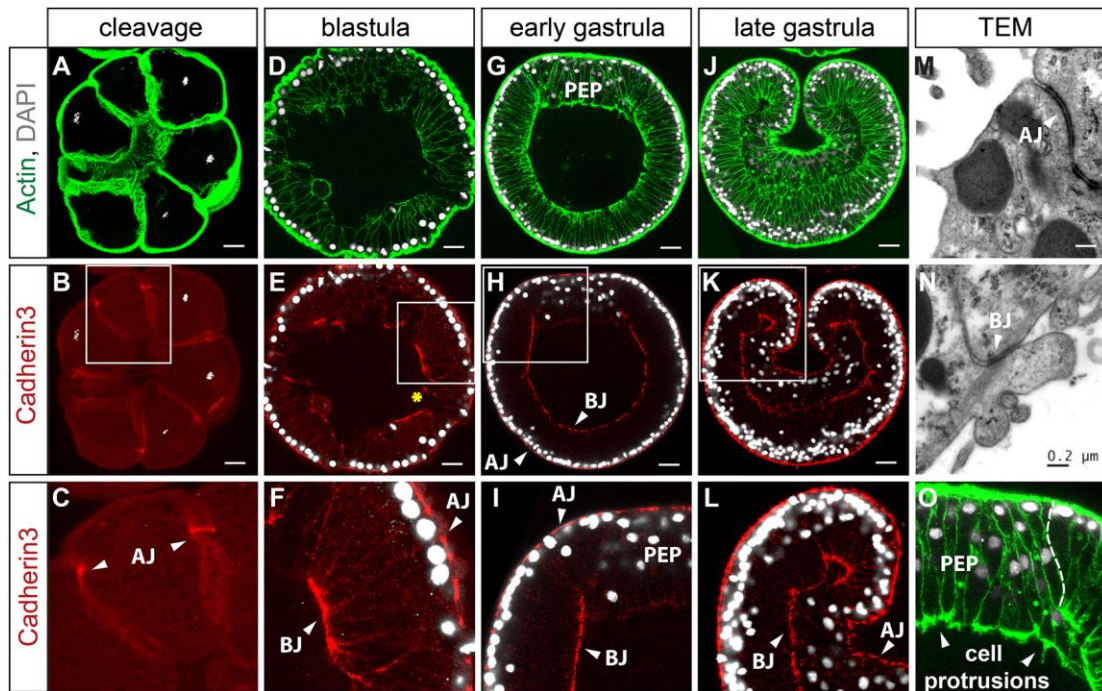

**Fig. 3. Cdh3 is a major component of adhesion complexes during cleavage and gastrulation.** (A-F) Besides apical junctions (AJ), strong basal epithelial contacts (BJ) form in the blastula during epithelialization. (G-I) As the pre-endodermal plate (PEP) starts to invaginate, Cdh3 disappears from the basal junctions and decreases in the apical junctions in the pre-endodermal plate. Ectodermal cells preserve both apical and basal cell contacts. (J-L) Late gastrula. Apical junctions are present in the ectoderm and in the endoderm. (M-N) Transmission electron microscopy (TEM) of the *Nematostella* epithelium. (O) Cell protrusions on the basal side of the PEP. Apical cell-cell junctions (AJ); basal cell-cell junctions (BJ). Yellow star (\*) is located next to the dividing blastula cell. Scale bar 20  $\mu\text{m}$ ; Scale bar M-N: 0,2  $\mu\text{m}$ .



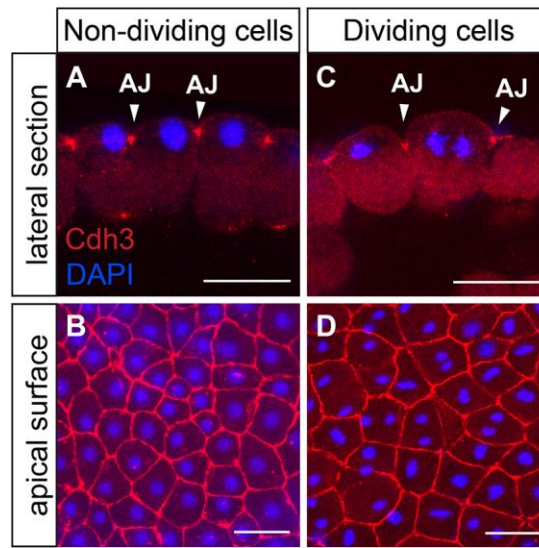

**Fig. 4. Cdh3 apical junctions localization and cell polarity are preserved during the cell division.** (A, B) Non-dividing blastula cells. (C, D) Dividing blastula cells at different mitotic phases. Scale bar 25  $\mu$ m.

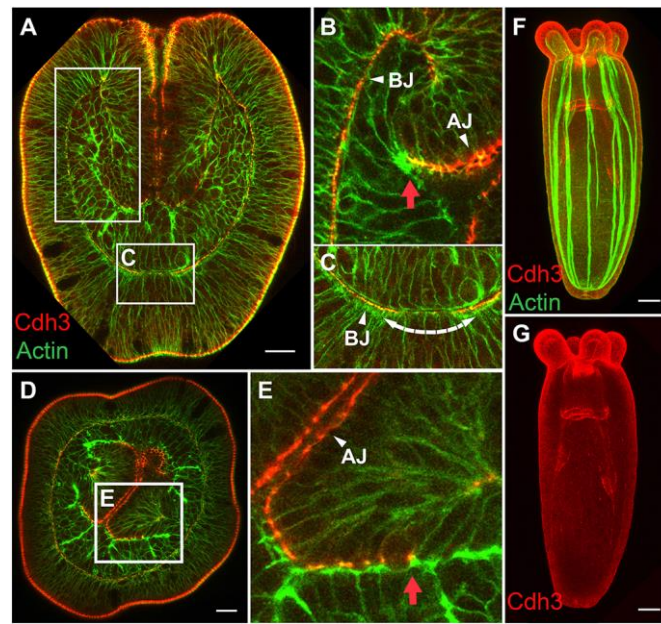

**Fig. 5. Cdh3 marks the boundary between ectoderm and endoderm.**

(A-C) Lateral section of planula. (D, E) Cross-section of planula. Ectodermal-endodermal boundary in the pharynx is distinctly labeled by Cdh3 localization in the cell junctions. (F, G) Primary polyp. Cdh3 is expressed exclusively in the ectoderm, forming apical and basal adherens junctions. Red arrow indicates the boundary between the last ectodermal and the first endodermal cell. Scale bar 20  $\mu$ m.

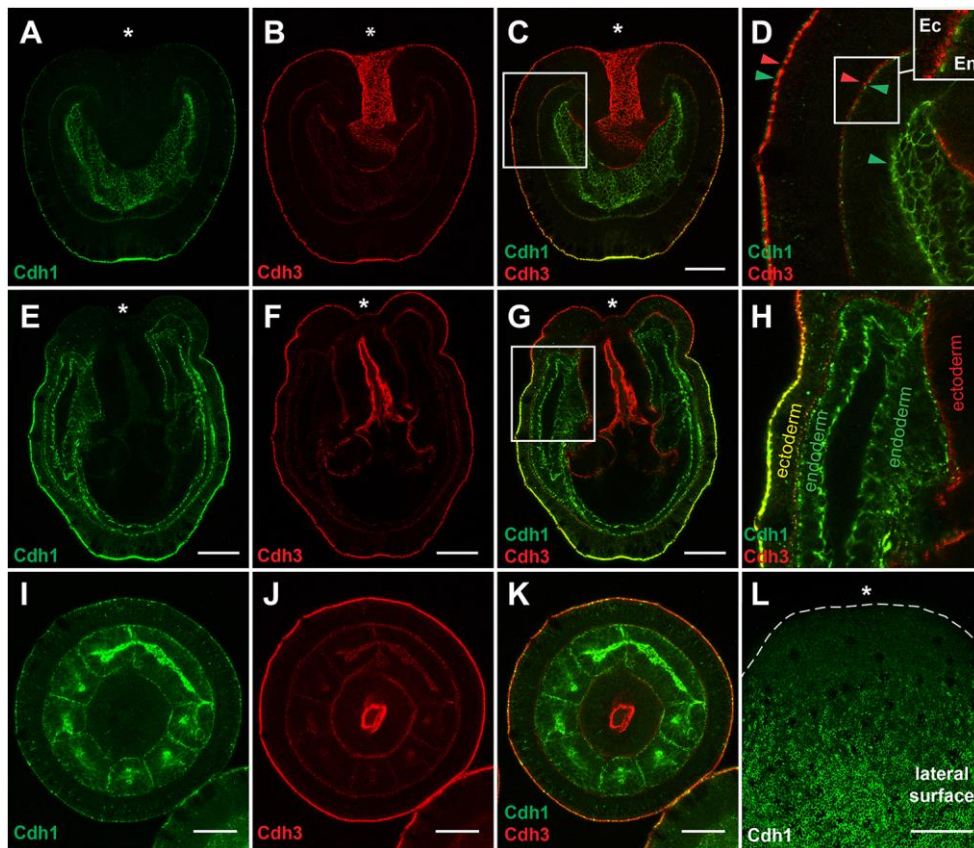

**Fig. 6. Cdh1 and Cdh3 protein localization during germ layer differentiation.** (A-D) Planula lateral section. D is an enlargement of an area shown in C. (E-H) Lateral section of the primary polyp. H is an enlargement of an area shown in G. (I-K) Planula cross-section. (L) Surface of the planula, oral part of the ectoderm is free of Cdh1. Cdh1 is localized in the apical and basal junctions of the endoderm, as well as in the apical junctions and basal junctions of the aboral ectoderm, especially in the area of the apical organ. Cdh1 is gradually disappearing from the ectoderm towards the oral pole and completely excluded from the ectoderm of the tentacles and the pharynx. Cdh3 is localized to the apical and basal junctions of the body wall ectoderm, ectoderm of the pharynx and is completely excluded from the endoderm. Asterisk marks an oral pole. Scale bar 50  $\mu$ m.

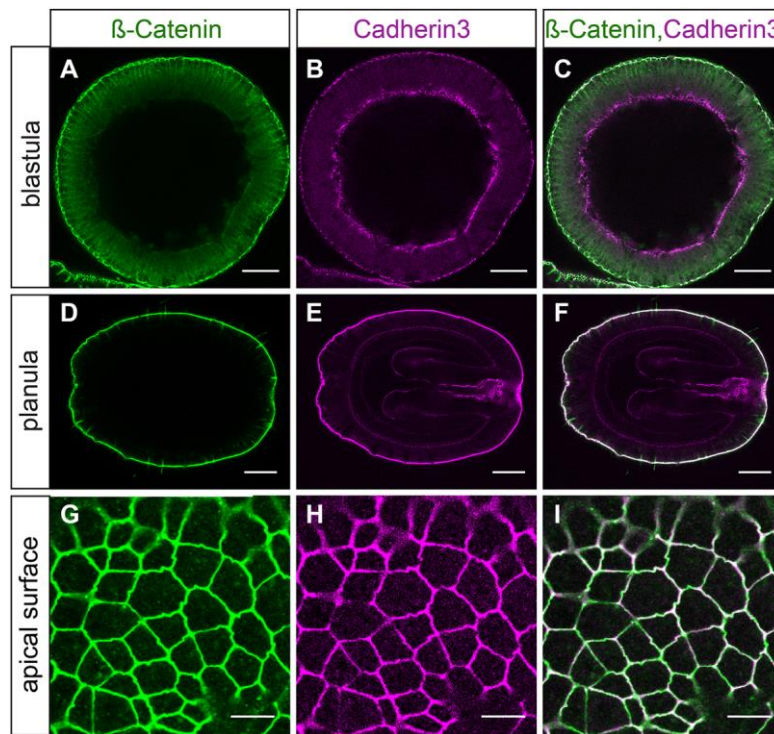

**Fig. 7. Cdh3 and beta-catenin are co-localized at the apical cell junctions of the ectoderm.** (A-C) blastula stage. (D-F) planula stage. (G-I) Apical surface of the ectoderm. Note that only weak beta-catenin staining can be detected at the basal ectodermal junction and none in the endoderm. Scale bar (A-F) 50  $\mu\text{m}$ ; (G-I) 10  $\mu\text{m}$ .

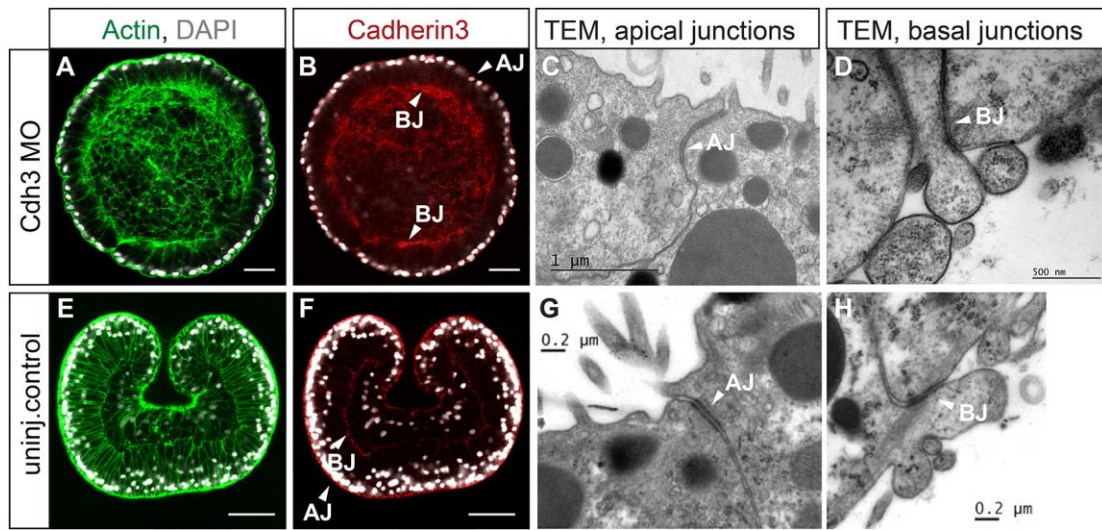

**Fig. 8. Cdh3 knockdown blocks gastrulation movements.** (A-D) Cdh3 morpholino (MO) injected embryos, 28 hours post-fertilization (hpf). (E-H) Control embryos, 28 hpf. Apical (AJ) and basal (BJ) cell junctions of Cdh3 morphants look very similar to the cell junctions of the control gastrulae. Scale bar (A,B,E,F) 40  $\mu$ m.



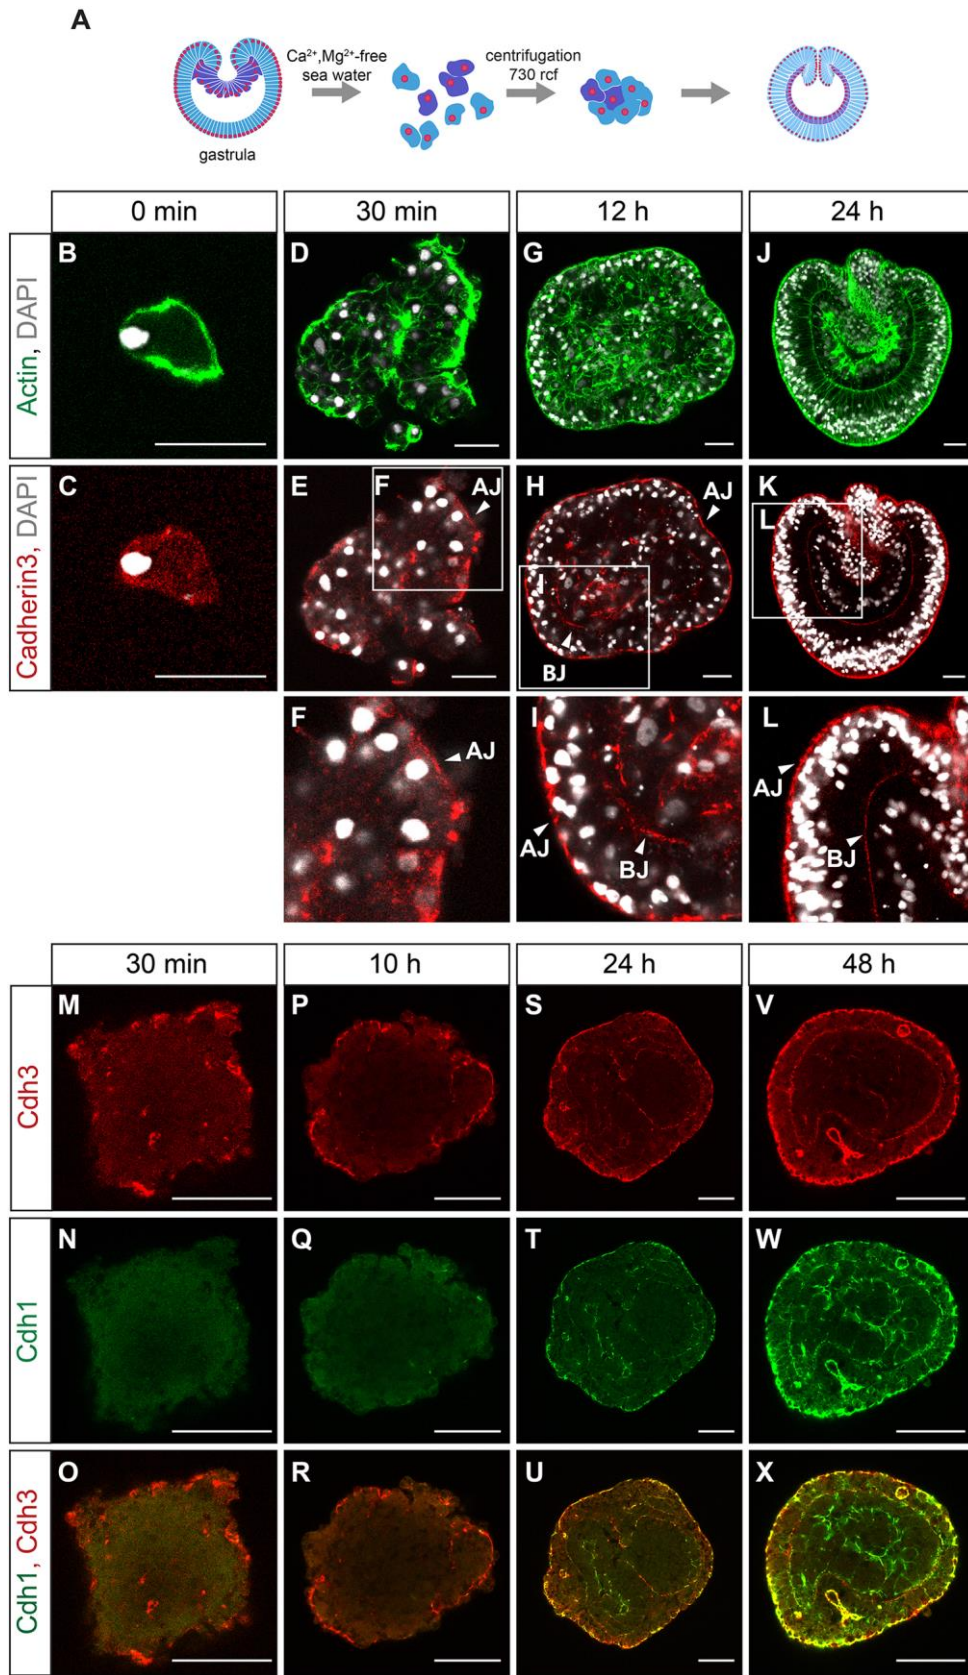

**Fig. 9. Reestablishment of the polarity and de novo germ layer formation**

**in the cell aggregate.** (A) Scheme of the experiment. (B,C) Dissociated cells do not show polarized Cdh3 localization. (D-F) Epithelialization of the cell aggregate starts ~30 min after re-aggregation in small groups of cells. (G-I) 12h after dissociation the ectoderm of the aggregate is fully epithelialized. (J-L) 24h. Aggregate forms two germ layers. (M-X) Cdh1 protein appears at the junctions at 24h of aggregate development. At 48h after re-aggregation Cdh1 is broadly expressed in both germ layers. Apical junctions (AJ); Basal junctions (BJ). Scale bar (B-K) 20  $\mu\text{m}$ ; (M-X) 50  $\mu\text{m}$ .



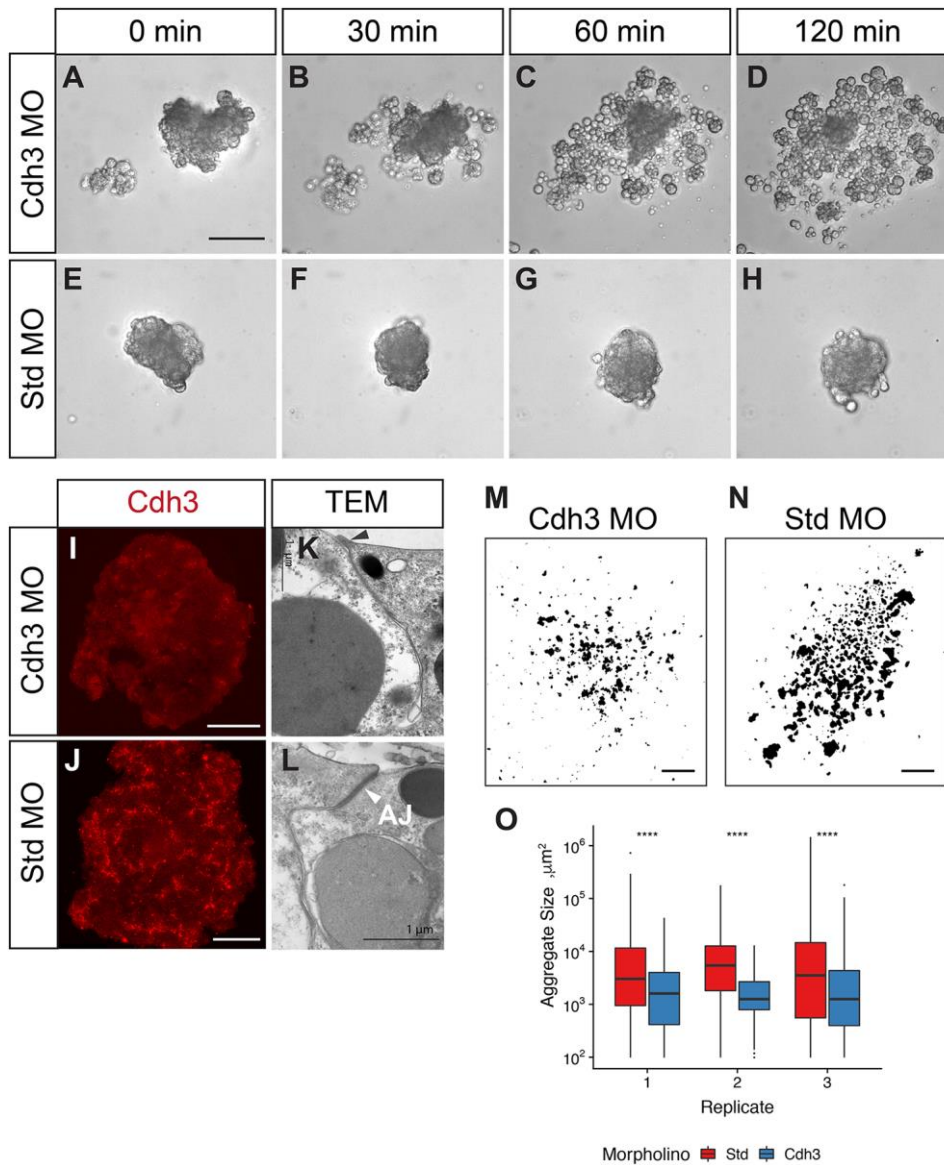

**Fig. 10. Cdh3 MO aggregates fail to form adherens junctions *de novo*.** (A-D) Cdh3 morpholino (MO) aggregates do not form new cell contacts, fail to develop and fall apart into cells. (E-H) Standard (Std) MO control aggregates stay compact. (I,J) Down-regulation of Cdh3 protein in the Cdh3 MO aggregates. Confocal microscopy, Cdh3 antibody staining. (K,L) TEM of the apical adherens junctions. Apical cell junctions (AJ) of the Cdh3 MO aggregates are much less pronounced than AJ in the control aggregates. (M,N,O) Cdh3 MO aggregates are significantly smaller than Std MO aggregates. Distribution means within each replicate were tested for significance using a two-sided unpaired Wilcoxon rank-sum test (\*\*\*\*:  $p < 0.0001$ ). Scale bar (A-J) 50  $\mu\text{m}$ ; (K, L) 1  $\mu\text{m}$ . (M,N) 1 mm.

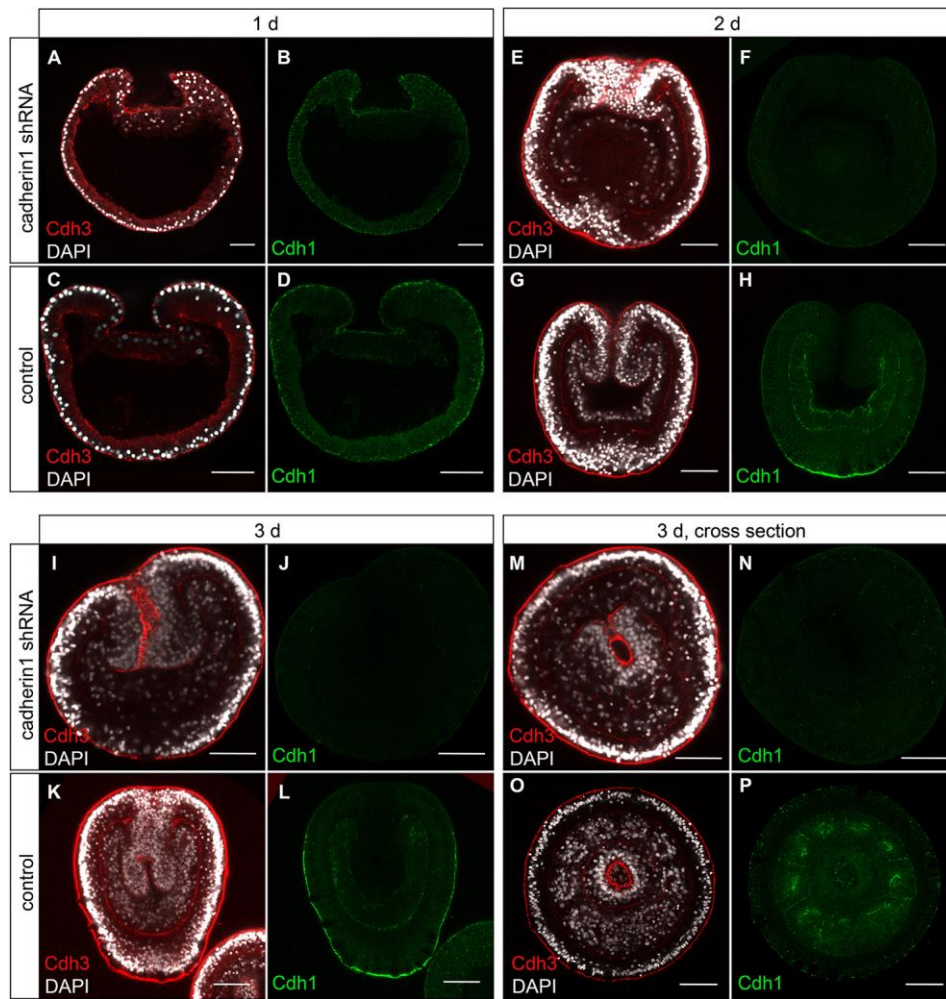

**Fig. 11. Mesenteries do not develop upon Cdh1 knock-down by shRNA injection.** Cdh1 protein expression is strongly down regulated. (A-D) 1 dpf, gastrula stage, lateral section. (E-H) 2 dpf planula, lateral section. (I-L) 3 dpf planula, lateral section. (M-P) 3 dpf planula, cross section.

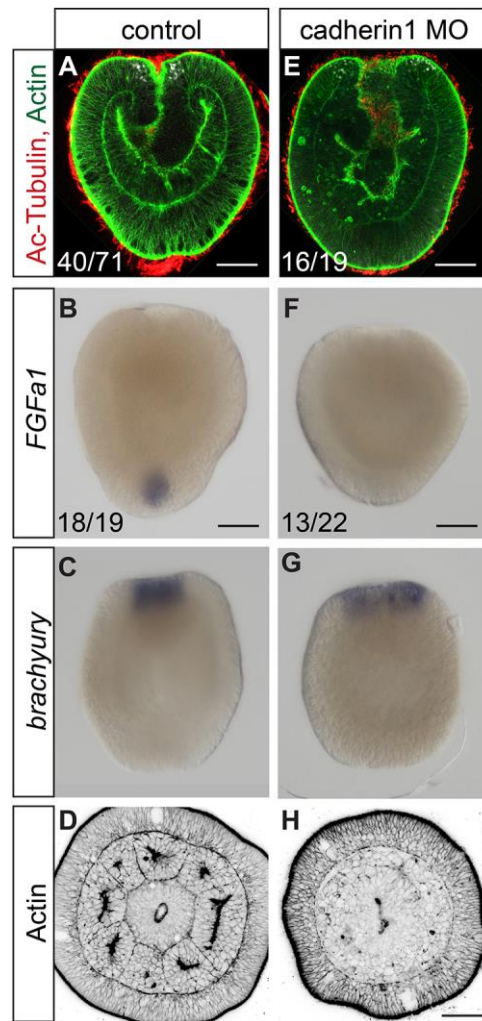

**Fig. 12. Cdh1 knock-down impairs apical organ development.** (A-D) Control embryo. (E-H) Cdh1 MO knockdown. Apical organ fail to develop (acetylated tubulin antibody staining). *FGFa1* is not expressed. Mesenteries do not form (phalloidin staining). *Brachyury* expression is normal. Scale bar 50  $\mu$ m.

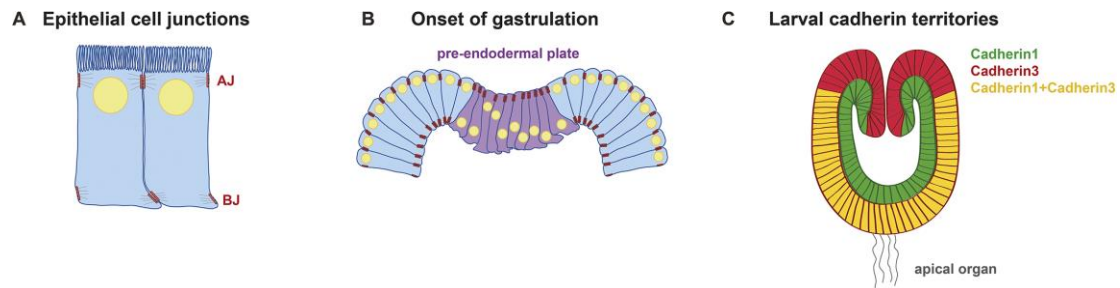

**Fig. 13. Cadherin localization during early development of *Nematostella*.**

(A) Schematic depiction of the apical and basal adherens junctions in both epithelial cell layers. (B) The onset of gastrulation is characterized by a downregulation of Cdh3 in the basal junctions, accompanied by apical constriction, migration of nuclei to basal positions, formation of filopodia. (C) Overlapping and specific expression domains of Cdh1 and Cdh3 in a planula larva.

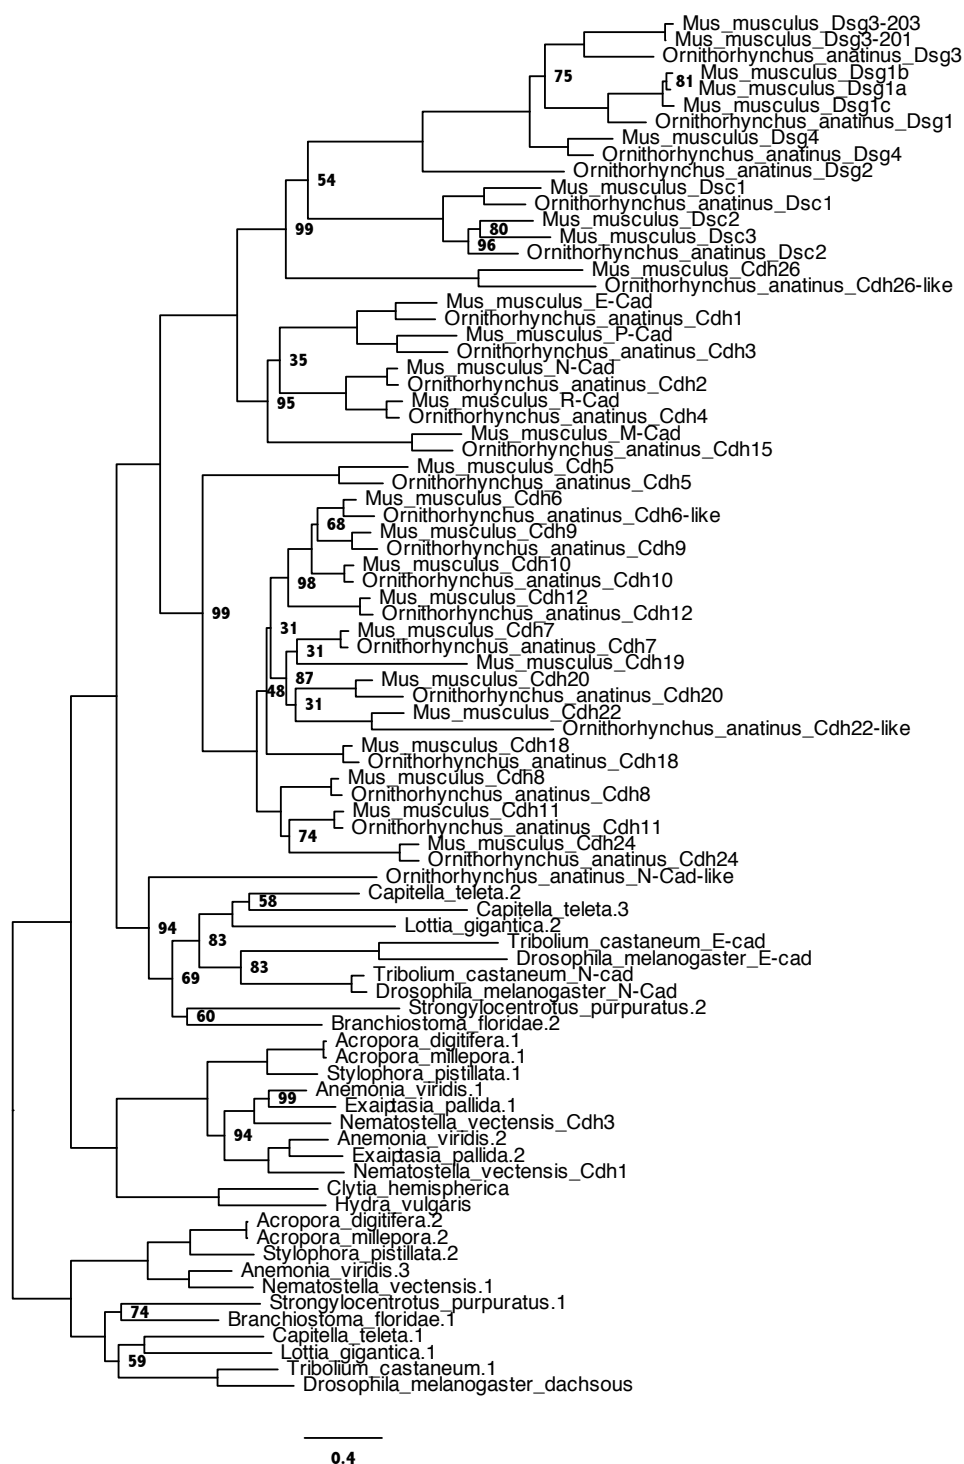

**Fig. S1. Phylogenetic analysis of classical cadherins. Extended version of the tree in Fig.1.** Dachsous cadherin proteins were used as an outgroup. The phylogenetic tree was constructed with the maximum likelihood method in IQ-tree. The number at the nodes indicates the bootstrap support from the maximum likelihood method.



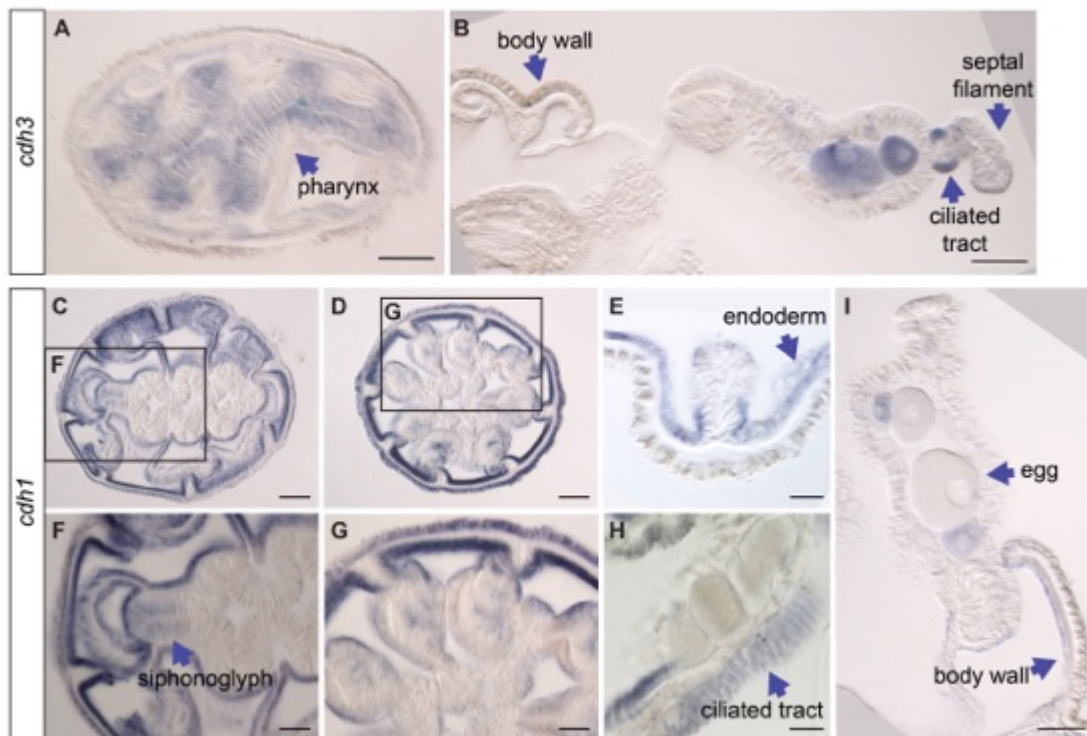

**Fig. S2. *cdh1* and *cdh3* expression in adults and juveniles.** (A-B) *cdh3* is expressed in the ectoderm of the pharynx, septal filaments and ciliated tract and in the oocytes. (C-I) *cdh1* is expressed in the endoderm, ciliated tract, ciliated lobe of the pharynx – siphonoglyph and small oocytes. Scale bar A-D, I: 100  $\mu$ m. Scale bar E-H: 50  $\mu$ m.





**Cdh3 antibody 2**

|      |                                                                                 |      |
|------|---------------------------------------------------------------------------------|------|
| Cdh1 | QEVA--SASLTVEVTEEKDLPKFSSDSYQLTVDESAAAGTTLAPGLLIIDSSTSSDQFDC                    | 826  |
| Cdh3 | PNIMTSSSDVAITIKDEKDPQFSQSEYKVSVPEDASVRSTLSRGIRFVDEDTLSTQLEC                     | 816  |
|      | : : * : : : : : : * * * * * : : * : : * : : * * * * * : : *                     |      |
| Cdh1 | SMEAITSLHTLYNFEVTQQSGRCFLRVQAGGKLD AHLASKYTFNVRATDRNFRNMFATAQ                   | 886  |
| Cdh3 | SMEEMTSRIPLDYL SVVQDGGECKFVIE--KTLDTFVASKFTFDMKVTDKNFPGMFATK                    | 874  |
|      | ** : * * * : : * . * . * . * . * : : : . * : : * * * * * : : * * * * * :        |      |
| Cdh1 | VEVNVIDVNDHKPEFLQESYWLSVPSSTPAGSSLVTVQAEDMDIGTNAQVRYELLRQEN-                    | 945  |
| Cdh3 | VEVTVDTDNTYTPVFSRTSFWASKPDTLPTDTSVMQLSIIDKDMGSLGEVTYQLIDPTVS                    | 934  |
|      | ** . * * * : . * * : * : * * * . : * : : * : : : . * * * : . * * * :            |      |
| Cdh1 | -----SERFILNDNNQLSTASTLTPNVRYQLLIRASDSATRNPSSAQVPVYVSVYSPSE                     | 999  |
| Cdh3 | AGETSGYDRFRVDDSGMIESTNILTANTLYKLQAKAKDGGSPALEATVDVFISVYPSD                      | 993  |
|      | : * * : * . . : . . . * * * . * * : * . * . . : . * * * * * * :                 |      |
| Cdh1 | SPIVFDKSSYNQNL PEDSSANTLVFTAKATRSGSSSGITYELVGGYKQIGEAMFSIKPDT                   | 1059 |
| Cdh3 | TPVRF SQNPYSASIAENSPLNTEVFRATATKSGSSSGIAYSLVGGQIENGNTMFSIDS-S                   | 1052 |
|      | : * : * . . * . : * : * * * * * * * * * * * * * * * * : * : * * * . :           |      |
| Cdh1 | GQVYL IKKLD FETKSYFPIAVRAKYSGGAI ELASEVVAKVTVVDVNDNGPRFAFHESKST                 | 1119 |
| Cdh3 | GRVLLLRQLDRERTKSYKLYVRGTYTGGSLTLATDVECLVTVTDVNDNTPLFTFDRV NKQ                   | 1112 |
|      | * : * * : * : * * * . . : : * . * . * * : * : * * . * * : * * * * * * * *       |      |
| Cdh1 | VVIDSFSAKDTQLVQARALDADSGSLGEVTYGIDGGRSTSNLFPNINVKTGMIFATREIL                    | 1179 |
| Cdh3 | FVVDNYAPANTI IATLRAVDSDEGANAQVTMSIQGT-VPSNAPFTIDTPSNVLKTTTKLS                   | 1171 |
|      | . * : * . : : * . * * * : * . * : * * * * * . * * * * * . : : : * : :           |      |
| Cdh1 | YTQGS SYIIIVVATD GATDGSQIKQKFTVNVQVLDTPRPPSFPQKTY SAPVTETAGVGD T                | 1239 |
| Cdh3 | --TVIDYQITVRATDKG--SPPQYSETTVIVKVLNIQTTPVFGQAKYTVDVQENTKVGQQ                    | 1227 |
|      | . * * * * * . . : . : * * * * * : * * * * * . * * * * * . * * : * * :           |      |
| Cdh1 | VTTVRAVYKPN AFLKYTFVSGNEDNTFCVNGFGIISVAKSLDREKVAGYTLGMRVTLGQ                    | 1299 |
| Cdh3 | VISVKATYGD SNGLLQYSFVSGNLGDAFCIDSSGQITVAQPLDREVLPSYTLRVRVALGN                   | 1287 |
|      | * : * * * . . * . : * : * * * * * * . : * * * : * * * * * : . * * * : * * * * : |      |
| Cdh1 | HVDDTTVYVNLTDINDDAPHFTSAIYRRS I KEGLAEDTEILPPVIAVDHDFG SNGKILYS                 | 1359 |
| Cdh3 | NEDFTEV FVSLTDINDDSPTFTKSVYEFFANEDISSGTS-IGKVAATDRDSGSHGQISYR                   | 1346 |
|      | : * * * : * . * * * * * * * * * . : * . . . * . : * * . * * * * * * * *         |      |
| Cdh1 | ILSGVHPDWDK YFNIDSATGKIT--TKMTLDYETHKSHTL FIRAEDNGSPKRLSGIAQVD                  | 1417 |
| Cdh3 | FLYASDIQSMDFDL DQTTGIIISLASGSLDYEDISMHVLFVRAEDNGAN-KLSAIAEVR                    | 1405 |
|      | : * . . : . * : * . * * * * : : : * * * . * . * * * * * * : * * . * * * :       |      |
| Cdh1 | IDVIDRNDNSPVFAAAFYRAKISLGAVKGT SVLQVHATDLDSGQNGQITYSIIQGN EEEA                  | 1477 |
| Cdh3 | IYLRDINDNDPKFSAASYHAKLSLDAPVLEHV VQVTATDLDTANNGRIRYSIVAGNQEGA                   | 1465 |
|      | * : * * * * * * * * * * * * * * * * * * * * * * * * * * * * * * * * * * *       |      |
| Cdh1 | FTI-NEQGVILVDKSLTTVAADK FSLKVEARDKNASPRSGSVTVEINVYLPDGPPMFVVS                   | 1536 |
| Cdh3 | FQVLT DNGLIRVAKSLTTVAASSFLLTLEAADSGDPERKGSVNVQVNVFLPDGPPKFVLD                   | 1525 |
|      | * : . : * : * * * * * * * * * * * * * * * * * * * * * * * * * * * * * * * :     |      |

|      |                                                                                                                                                     |      |
|------|-----------------------------------------------------------------------------------------------------------------------------------------------------|------|
| Cdh1 | PVTVYVKEGVPANHRVAGVKAATSEALTYTLLSGNEAGMFRINPSTGSLDATRELDYEER                                                                                        | 1596 |
| Cdh3 | PVIVNATEGIAANQRVAVAKAATSEALKYEILSGNTNDMFAINPSSGVILTTRELDYEEA<br>** * ..** : ** : *** .***** . * : **** . ** ***** : * : *****                       | 1585 |
| Cdh1 | RRYELKIEARDTRDRSAMVELIIIVVNINDNKPTFVDIVDGQIDRKAIGTCSPTDIAEGE                                                                                        | 1656 |
| Cdh3 | TGYIMNIIARDTRDRSASVQVIINVVNINDNEPMFPGETNGQIDRKVAGPFAPGFI----<br>* : * ***** * : * * ***** : * * . . : ***** . * : * *                               | 1641 |
| Cdh1 | VITRLGAFDRD-GDEITFIVPDDVKDLFKIDSRGVVTAKKPIEDLPKIYPFNVKALDNGE                                                                                        | 1715 |
| Cdh3 | -ATRLTAVDKDIGDRVYYKISIEAENYFTIDERGQLICKNDLKGIASPFRFTIEARDGGL<br>*** * . * : * * . : : : : . : : * . * . * * : . * : : : . : * . : * * . *           | 1700 |
| Cdh1 | PPQETDVKVRLVVFHYRPDQKHVRVNVREDTPTGSVIATVRRYFPNGIVSLLLPEKANFS                                                                                        | 1775 |
| Cdh3 | PQKVHTANVLLVFKYRPKQPVRVTVPETTRAGTVITRVPRYFPPTGEFSIVYPENTNFT<br>* : . : * ***** : * . * * * : * : * * : * * * * . * . : * * : * * :                  | 1760 |
| Cdh1 | VRANGDVILLTPLDYESQQFHRMTVREEL--GNQTNVDVDEVVVLDVNDNRPIWMERERL                                                                                        | 1833 |
| Cdh3 | IDNDGNVTLNRPLDYEEIAFTLITVREKQASGPLENYIDVEITVLDVNDNAPVFTMISTL<br>: : * : * * ***** . * : ***** : * * * : ***** . ***** * : : . *                     | 1820 |
| Cdh1 | ARVNTNSRAGAQVYQLEARDEDDGSSGLVGYQLKSPSNDAKRKRSPQHPFTINPKTRQ                                                                                          | 1893 |
| Cdh3 | GRVNSNSRAGATAFQLQARDLDSGNSGLIGFQLENIP-----TLFMINPLTRQ<br>. * * : * * * * . : * * : * * * . * . * . * * : * * : * * . * * * * * *                    | 1868 |
| Cdh1 | MEVAG-SLKDQRYDLDFVAFDYGIPRLTSDTITLNVDSAGQQLPPRFKVSYHFMVSED                                                                                          | 1952 |
| Cdh3 | IEVGQPRQLQTSRYGLDIIIPFDYKPSVNGTKATVDIE--TVQSPPVFNESYTFVTSER<br>: * * . * : * . * . * : : * * * * * * * : . . . * : : : : : * * * * . : * * * * *    | 1925 |
| Cdh1 | AKYLSLVGIIILARSISGARLDYKIVSGNVGDKFIAMGDGRILLNSLLDFERDQTQYNLKV                                                                                       | 2012 |
| Cdh3 | APTMTKIGDVTAVSVSGARLSYTIIEGNTGDKFLAKDNGDIVLNSLLDFERDQSVFNLKV<br>* : : * : * * * : * * * : * * . * . * . * . * : * . * * : * * * * * * * : * * * *   | 1985 |
| Cdh1 | KATEQIPDGLDSTVDVKIDVINANDHFPYFDQQLYSVQIPESTAVGVLVQEVTAKDCDCL                                                                                        | 2072 |
| Cdh3 | EAKEQIPKGLSSEVDVTITVINANDHFPYFDQQLYSVQIPESTAVGVLVQEVTAKDCDCL<br>: * . * * * . * * . * * * . * * * * . * * * * : * : : * * * * . * * : : * * * * * * | 2045 |
| Cdh1 | SSCTCSPGFLTYISIEPSKEQGGKFYIDPATGKISVSVVALDYEDQRYHLLKVYATDKGKKS                                                                                      | 2132 |
| Cdh3 | SDCTCQVGLKYSVEAG---TSFD-IDQTGAIVVARTLDYETSKVQVLKVMASDQGEKV<br>* . * * * . * * . * * : * . * * * * * : * * * * * : * * * * * : * * * * *             | 2100 |
| Cdh1 | FQGLCFVNVTLTNVNDNRPTFLKSAYEFRVAEGAATGESLAIVVAVDADGDAVT---YSK                                                                                        | 2189 |
| Cdh3 | FTAVTFVVTLEDTNDNAPVFKRNDYLFRTADASTGSMIGAVIARDQDQDDIEKVRYSV<br>* . : * * * * * : . * * * * . * : . * * * : * . * * . : . * : * * * * : * *           | 2160 |
| Cdh1 | AGGALQFSVDQSTGVITLNSALDP-NKNQYTLQVMAKDSGGLTSTVSVTFNVADANNVNP                                                                                        | 2248 |
| Cdh3 | VS-GTEFNVNTEGTGLTVAKDLSTGAKSEYSMEIRATDSTK-SNDARVRVNVEYKNMYRP<br>.. . : * . * : . * * * : * . * * . * : : : * * * * . . . * . * * * * *              | 2218 |
| Cdh1 | QFTNCGTVSIRENDPRDTKITQLTATDADRQNGQITYSIEDASSQTLFSIEPRTGVVRS                                                                                         | 2308 |
| Cdh3 | EFTKCGKATIQENLLKGQLIATVTATDRDQGRNGEVEYKIVPVGQDFFTINNKTGEVIT<br>: * * : * * . : * * * * . : . * : * * * * * : * * * * * : * * * * * : * * * * *      | 2278 |

|      |                                                                                                                                               |      |
|------|-----------------------------------------------------------------------------------------------------------------------------------------------|------|
| Cdh1 | LTSLDRENKDSYNAI IKAEDGSSKQDESERLLWYCYLTINVEDVNDNRPYFLAAKYFGSV                                                                                 | 2368 |
| Cdh3 | TSSLDRETKATYTVI IITAEDGGHGKDPARLMSYCFLEVEVQDVNDNYPFITRAYLGS I<br>:*****.* :*..**.*****. :* :****: **:* :*:***** * *:: *:*:                    | 2338 |
| Cdh1 | FSSAPNGSNILTVQATDADSGSNAKIKYALLDSAGGLFRLDSSGILRTNTNPARLQLETG                                                                                  | 2428 |
| Cdh3 | QNTKPIGTSVLTVSATDPDAGDNAKITAFKSPNDKFEIDSTSGDIRTKVALTGTK---D<br>. : * * : . : ****.* ** : * . ****.* ** : . . : . : ** : ** : . : : .          | 2395 |
| Cdh1 | KKLLLEVSAKDVESIAGTQPGKPKTYTTQIEILVSNEEPPKFSQQVYTASINENMETGST                                                                                  | 2488 |
| Cdh3 | VNEKMTVVASNTEAIQGGDAN-NRDRETEVTIYITDLAPPVCDKNLFTARILESLSVNSD<br>: : * * . : . : * * : . . * : : * : : * * . : : : * * * * . : . . . *         | 2454 |
| Cdh1 | VTRITATSSTGAEISYENVDTNPRAKILFRVQPDGYIITGDRPDYERG---TTYNMQFA                                                                                   | 2544 |
| Cdh3 | VLKVSQAQAPGGKSIVYSPVKANADIDEKFSVETNGQIKTASQLDYEQLSPGDKTFKLQVR<br>* : : * : * * . * . * . : * * . * * : * * * * . : * * * * . * : : * .        | 2514 |
| Cdh1 | AKDKKTLLYSTVKVVINIIDVNDVSPAFLLAINTRNARVLENKPAPTKVISMKAIDDDGS                                                                                  | 2604 |
| Cdh3 | AQEENTNLYSTCSVAITLEDVNDKPTFDLG--NYDARVRENAPIGTTVITIKATDRDTG<br>* : : : * * * * . * . : * * * * . * : * * . . : * * * * * * . * : : * * * * .  | 2572 |
| Cdh1 | EPHRRVTY--EMKDNPNFQIDASTGMITTKTTLDREVTPKYDVEVTAKDGVN-----KES                                                                                  | 2657 |
| Cdh3 | DAG-VVTYFLKAGSDEHFAIDVNSGTLTTKKSFDREGQSLFSVIVVIARDKGNPNP GALSEE<br>: * * * : . : : * * . : * : * * : : * * * * . : * * * * * * . *            | 2631 |
| Cdh1 | AILYITVVDQNDQPPVFAPKSYAISVPEDSPIGTSVLDIYATDADVGENAKITYFISKGD                                                                                  | 2717 |
| Cdh3 | VAVKVLVVDENDSPQFDQAEFQTSVSESATIGTSILEVVATDQDIGDNAKLEYFISGGD<br>. : : * * : * . * * * . : * * * . : * * : : * * * * : * * * * : * * * * *      | 2691 |
| Cdh1 | PEGKFSIVTS---PVKGLVNVNGKLDKFETKSSYTLVETATDGKFSDTAVVTVTIQDVND                                                                                  | 2773 |
| Cdh3 | GRFWFAVQTISKGRTYGEVQVDARLDFETKSSYTDVTATDGRFSATTRVLITITDAND<br>. * : : * . * * : . : * : * * * * * * : * * * * * * * * * * * * * *             | 2751 |
| Cdh1 | LPPVF-----SSPLYESRIQENTGPGAGVVMVTASDIDSPTISFSLDDRKDYFQIT                                                                                      | 2825 |
| Cdh3 | IVPFMFTLTPTLLSPIYTGRVSEMTGSGVEVLKVYAVDTDSPNIQYTLGSS-SYFTI-<br>: * : * * * * * . * : * * * * * . * : * * * * * . * : : : . . * * *             | 2809 |
| Cdh1 | PIRASGPGNVWVDIIRTGSKQLDREESPVKVFVTVIANDGKHTAQAEIRVNLTDVNDNAPR                                                                                 | 2885 |
| Cdh3 | --AARQEGGKFGVGIISTGSQPLDREATPIFSFNVLAKDGVHTGSAYIEINVTDINDNQPR<br>* * . : * * * * * : * * * * : * . * : * * * * * . * . : * * * * * * *        | 2867 |
| Cdh1 | FPASPYIGYVEENKPSGTSVMYIQAVDDDDPLAGGNAKLSYELTDSAGDKFSIDPLSGLI                                                                                  | 2945 |
| Cdh3 | FPNSLYVGYVEENKAAGTSVMYVQAHHDDDDPYLGGNAEIRYTLTDNAGGKFKIDANTALV<br>* * * * : * * * * * : * * * * * * * * * * * * : * * * . * . * . * * . : . :  | 2927 |
| Cdh1 | KTKVTFDREQTPNKFKVRVKATDAGNPRLSASVDGIIHVSDANDHKPKFTEKFRGVSVAE                                                                                  | 3005 |
| Cdh3 | TTEEILDRETSPTSFTITVLATDQGANKLSTTKVATIYVTDANDHAPVFTKRIFRGTVSE<br>. * : : * * * : * . * . : * * * * * : * * : . * : * * * * * * * * : : * * : * | 2987 |
| Cdh1 | NAPPGYSVLRVTATDEDVGPNAEFVFFVVVQGNDPHAFYIDPFNGTVLVSGILDYKKEY                                                                                   | 3065 |
| Cdh3 | DVRPGYVVTVSATDTDGPNAELEFVVTHGNEPAAFYVDPSKGTVHVSGILNYTLRKS<br>: . * * * * * : * * * * * . * * * * * : * * : * * * * * : * * * * * * * : * . *  | 3047 |



|      |                                                                       |      |
|------|-----------------------------------------------------------------------|------|
| Cdh1 | TITLTVADRGMPPLQGDDETAYVVEILDANDNAPEFIPKIYNASVLEDVGARQPVLTVTA          | 3125 |
| Cdh3 | NLTVTVSDRGMPVLSDNSPAYVLITITDANDNAPIFIPNQYNKTVAEDLAVGSPVVVTA           | 3107 |
|      | .:**:*:*:*:*:* * .:. . **:* * ***** **: * * * :. . . :. :.*           |      |
| Cdh1 | VDKDSGPNGNFTFAIDPRSDPDDAFTIEPNPNNASIGIIRTRVPLDQEKTPSFHLKVTA           | 3185 |
| Cdh3 | VDYDSGDNAKFVFDITG-GNPDDLFEVVPNPDNSSLGIVRTRLPLDRETTPIHLEITAK           | 3166 |
|      | ** *** * .:.* * * .:*** * : **:*:*:*:*:*:*:*:*:*.* ** .*::*:          |      |
| Cdh1 | DAGGLQGEGERINVIDVNDNGPWFVPPFFVQGQIKEGVSARQFVTKLKAYDPDAFVKDQV          | 3245 |
| Cdh3 | DTGGLTGKAHVWLTLLDVNDNGPWFQPPFFVQGIKENVNVKQFVTKVSANDPDTKNGGAP          | 3226 |
|      | *:*:* * :. . * :. :.*:*:*:*:* * **:*:*:*.* .:.*:*:*:* * ** : .        |      |
| Cdh1 | ITFSIYNGTVGENFKLDPVSVTNESVDLHSYGVFDREAAPVWKIGIEAVDNGPKPKQNF           | 3305 |
| Cdh3 | FTYAIYNGTVSGNFADFIATITNVTTDMSSSGTFDRETTTWTIGIAGTDS-GRPAKSNF           | 3285 |
|      | :*:*:*:*:*.* ** * * .:.* * :.* * * **:* : .*.*** .*. * .:.*           |      |
|      | <b>Cdh1 antibodies 1 and 2 (against extracellular domain)</b>         |      |
| Cdh1 | TYVYVDVLDVNDNAPKDGSLLIIVNAYDGNFTGGVIGKPYQDDDFDGDENTYELNSQSP           | 3365 |
| Cdh3 | TYVYVDVQDDNDNEPCDGRMTIIVNSYNGKFRGGPIAKTYIRDADYDGDVNTYTLQSQTG          | 3345 |
|      | ***** * *** * ** : **:*:*:* * * .* **:* * ** * ** * ** * : **:        |      |
| Cdh1 | GSYFRVNEGNGDITAAPMIPMGEYNLKIRVTEK-----DSPSTVTSSVRVLVRR                | 3415 |
| Cdh3 | GNFTVDTTTEISAAKDIPVGEYSLVISVTEVNTGNPPRANEVNFPKTVTSRATVIVRD            | 3405 |
|      | *.* * : .*::* **:*:* * * ** * : : * .***** . * : **                   |      |
| Cdh1 | IDKEAVDNGVAVEFTDMRKVGYFVGDYKGFEDVLASTLGVPTGDIKIFSVQKAHDNGLA           | 3475 |
| Cdh3 | ITSKAVSNSVALQISDMRKVEYFVGDYHDVVVVELSRMFGVSSSGIEVFSVQPSPIKUMA          | 3465 |
|      | * .:***.* **:*:*:*:* **:*:* . . * : ** :. . :.*:*:* : : : *           |      |
| Cdh1 | VVVFFT-VAAKDSYMPHWDVSVKLVDAKKPLESLGLKVSRLGMDECSKGNVQSVGVAKN           | 3534 |
| Cdh3 | LDVQFAVKTGSDYTKPYDVIRVVTNDRERLTNLGLKVTSIGIDMCALER--ERVGKCIN           | 3523 |
|      | : * * : .*. * **:* :. * : * .***** : ** * : . : * * . *               |      |
| Cdh1 | ILVRSSNFSVASGDYGKVPAPASLTIVSIDILPKCLYEAVFPPEKRCKPHNPCLHGGKC           | 3594 |
| Cdh3 | VVETSSAYKIASGDYGKVPAPASITLVSMDDVLRDKYVTIIEPGKNCNENPCLNGGTC            | 3583 |
|      | : : ** :.*:*:*:*:*:*:*:*:*:* : * : : * * .* . *****:*.*               |      |
| Cdh1 | YETVPDCPGFVCKCPTGYHGPLEMTRTRTFYGNYSIWLPKLMYSLSDLEFEFMTKTADG           | 3654 |
| Cdh3 | HDTVPAQ-WRVCQPRGYRGPHEQTTRTFRGTSYIWLPKLTAYDIRELSFEFTTEFKDG            | 3642 |
|      | :** * **:* **:* ** * ** * ** * ** * ** * ** * ** * :. : :.* ** * : ** |      |
| Cdh1 | LLVYQGPEREANGLKDFIAVVLRRGGRVELFVSLGLDPVTVKMDKGPRLDDGEWHTVQV           | 3714 |
| Cdh3 | LMLYQGPLKPGDNNGAKDFLAVFLDEGLVVRVSLGYEPITINMTRRPNLNDKEWHTVQI           | 3702 |
|      | *:*:*:* : * *** **:*:* * : : ** * :*:*:* : * .*: * **:*:*:            |      |
| Cdh1 | LRNMKD---IEI IIDRCSTALLEHKPDGTVVENRKSCHVYGRMLGRSVFLDGFGLQIGG          | 3771 |
| Cdh3 | IRDVIDRKMIRVIIDRCQSAQIV-EENGRVFEKRDTCETGRVKGRSVYLNFGPLQIGG            | 3761 |
|      | :*:* * * .:*****:* : : * * **:*:*:* : ** : **:*:*:*:*:*:*:            |      |
| Cdh1 | VSNPNMDFPDIPYTGFKGCVRNIKDNHNLVDLKNPLKVVNAPEGCQLASACPE-CKNDGY          | 3830 |
| Cdh3 | VET-DLTFIGITTTGFRGCI RNIDTEKMYDLRNP I KVVNAPEGCTLAGTCPNNCNDKGY        | 3820 |
|      | *. . : : * . * **:*:*:* * .:.*:*:*:*:*:*:*:* * .:*** :*:. **          |      |

|      |                                                                    |      |
|------|--------------------------------------------------------------------|------|
| Cdh1 | CEP-LMARDSICVCPNGYSKGKHCGRGKASYLLASSFTEYLVAARRRRREVVPPPTEIFN       | 3889 |
| Cdh3 | CEPSLMAGKSMCVCDLGYTGRACNDRSEANYYLENSFSQFLLTGIRARRELIQPPVPLMN       | 3880 |
|      | *** ** .*:***: **:*: *:.*:*.* ** .*:***: ** . :**                  |      |
| Cdh1 | RFYTTLALQVKLDEDATNVVFLASNRMGTEFQRVDVKDSKIRYVLRGARMVLVSFPQL         | 3949 |
| Cdh3 | EYYTHINLQVKLDPGKDCVFLSSNSLGTEFNRLDVKDHMLRYIFRLGDRMKVLSIPQY         | 3940 |
|      | .:** : ***** .:.: *:*:* ** :***:*:* ** .*:*** ** **:***            |      |
| Cdh1 | NVTDGVYHSVIVRRHGDYAIMQLDYSGYVIGSLHSQRTLLDMSGGEIFSGGLPNITIVRI       | 4009 |
| Cdh3 | NISDGKYHSVMVNREGNYAEMQIDYRAKMAGTTGGVQKLLNMGGGSIFTGGLPNITEVRV       | 4000 |
|      | *:* ** **:*.*.*:* ** ** . : * : . :*:*.*.*.*:*:* ** ** *           |      |
| Cdh1 | IEAIVENDGSAVISTNVRN---DG---DGYAAD-----                             | 4036 |
| Cdh3 | VEAIVQSGGDVILRTEDGKVLTSGIGVGGGMSFGAGSSVTLITIGSGVLTQRNILDSQSL       | 4060 |
|      | :***:..*..: : : . * . * : .                                        |      |
| Cdh1 | -----VGGVHVR-----N                                                 | 4044 |
| Cdh3 | FVRGIYKNGTVLYGSSSSSTFGMNVDDQGIPFKSSDTSSNGNGGVQISQGNPMTYGAGIQ       | 4120 |
|      | ***: : :                                                           |      |
| Cdh1 | LQLSGPLNLVSRKRRASGTVSVLGDFFGGCIAGTSVNGANMESDPSIKVHRQNVLDGCPCL      | 4104 |
| Cdh3 | WTLSPNPGRTQVGAGNSGGAVEVIGDMEGCTATNRFQGVSLDSPDEVRRQNVKGCPCA         | 4180 |
|      | **.* . .:***:*:* ** * . .:*..*.*.*:*:* ** *                        |      |
|      | transmembrane                                                      |      |
| Cdh1 | SNFCANGGTCVDAMPYICAPGWTGPLCTIVVTAPPVGER-GTPFMHPAVIAIILVVML         | 4163 |
| Cdh3 | EGFCENGGTCVDGTPPYCLCSPGWTGPTCVLIVTAPNPGQRPGRVVSFFVIACVAVLL         | 4240 |
|      | ..** *****. *****:*:* ** .*:*** ** * : . : * *** : **:*            |      |
|      | region                                                             |      |
| Cdh1 | <u>AIFIIMGAVILKRRPEPVVYADSTDTGHVHDNVRLYHDDGGGEEDNLGYDITKLMKYTY</u> | 4223 |
| Cdh3 | <u>AVMVMGAVLLKRTPPPVI-PVMVEDGHVHDNIRPYHDEGAGEEDNFGYDITQLMKYTY</u>  | 4299 |
|      | *:***:*:* * * : . : *****:* **:*.*.*:*:*:* ** *                    |      |
| Cdh1 | <u>IETTIAPPSVAPSK-----ASEDKISTSSDQPLLO</u>                         | 4253 |
| Cdh3 | <u>VEGGYGGGGYGGGGYGDCTGGAAFGSAYAADGGGKGLSGVEEVMVAEEKPLLO</u>       | 4359 |
|      | :* . . . : . : : : : ** *                                          |      |
| Cdh1 | <u>GRPPDAV--FGLTGKEPGPKPKMEGDDVGDFITTRVKITDREVFVLADELHIYRYEGD</u>  | 4311 |
| Cdh3 | <u>GAMEGYQQHGIIT--ITRRMMNADSVVGNFINSRVGEADREYILSYDALHIYRYEGD</u>   | 4417 |
|      | * . . * : : . : ***:*:* ** * : * * ** *                            |      |
| Cdh1 | <u>DTDVDLSEIEPDEE-DEEYEQEFDLQKQWPKFKLAKLYEDVDE</u>                 | 4356 |
| Cdh3 | <u>DSDIDDLSELGSDEGGDAEQSFDLQDWGRKFENLNKIYNLDD-</u>                 | 4462 |
|      | *:*:*:* : * * . : **.****:* **:* ** * : *                          |      |

**Fig. S3. Protein alignment of the full-length sequences of the Cdh1 and Cdh3.** Cdh1 and Cdh3 antibody epitopes and transmembrane protein regions are underlined and recognized with the colors. Transmembrane regions were identified with the SMART protein domain annotation resource. Alignment was performed with the Clustal Omega Multiple Sequence Alignment tool.

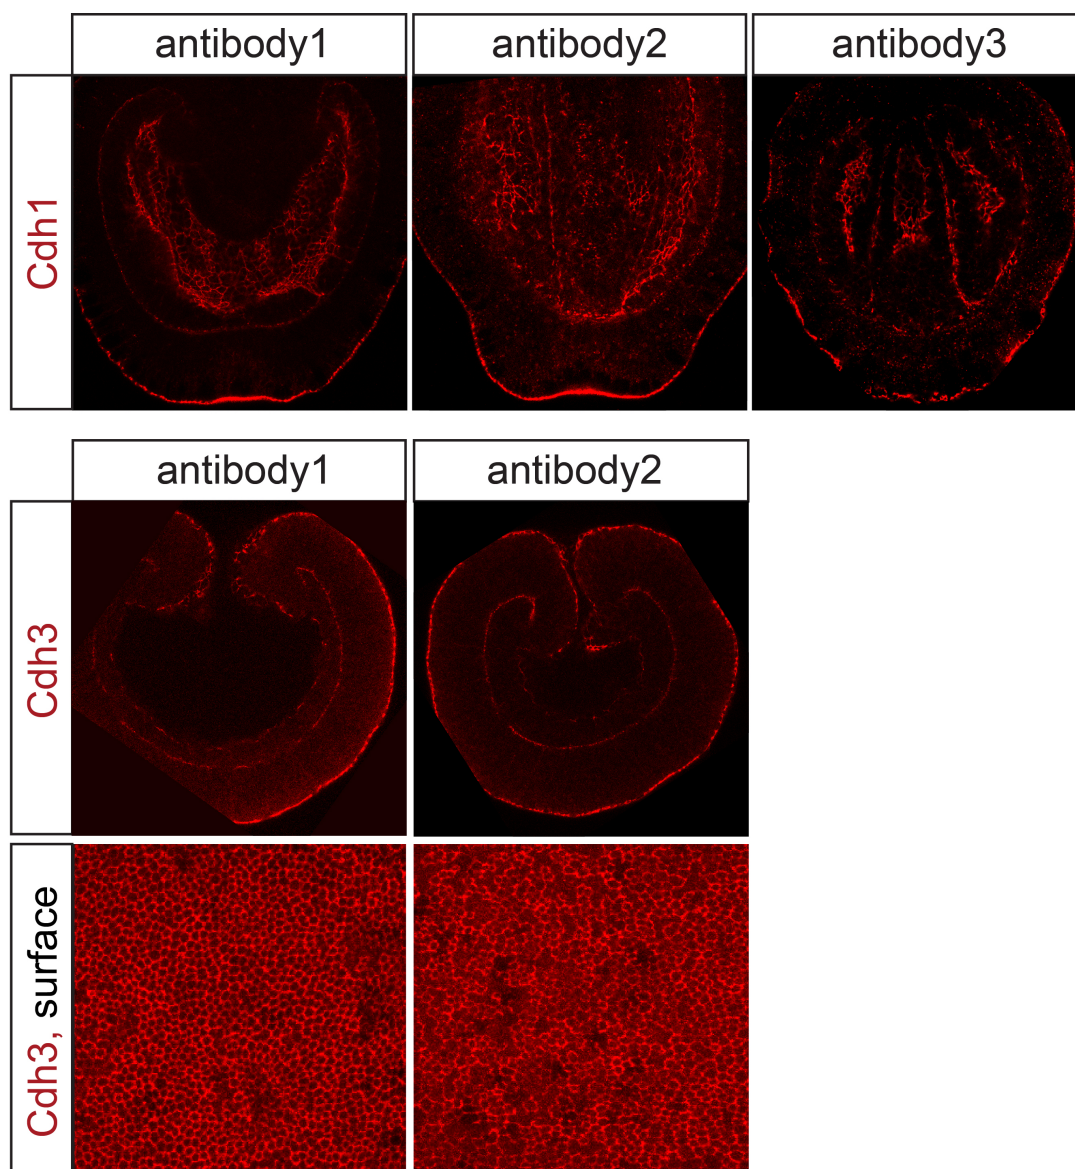

**Fig. S4. Custom antibodies generated in different animals against different protein domains result in the same staining pattern.** Cdh1 antibody1:domain1 (extracellular) and Cdh1 antibody2:domain1 were raised in rats; Cdh1 antibody3:domain3 (intracellular) was raised in a rabbit. All three custom Cdh1 antibodies show the same staining result. Monoclonal Cdh3 antibody1 and Cdh3 antibody2 were generated against different Cdh3 peptides and result in the same staining pattern.



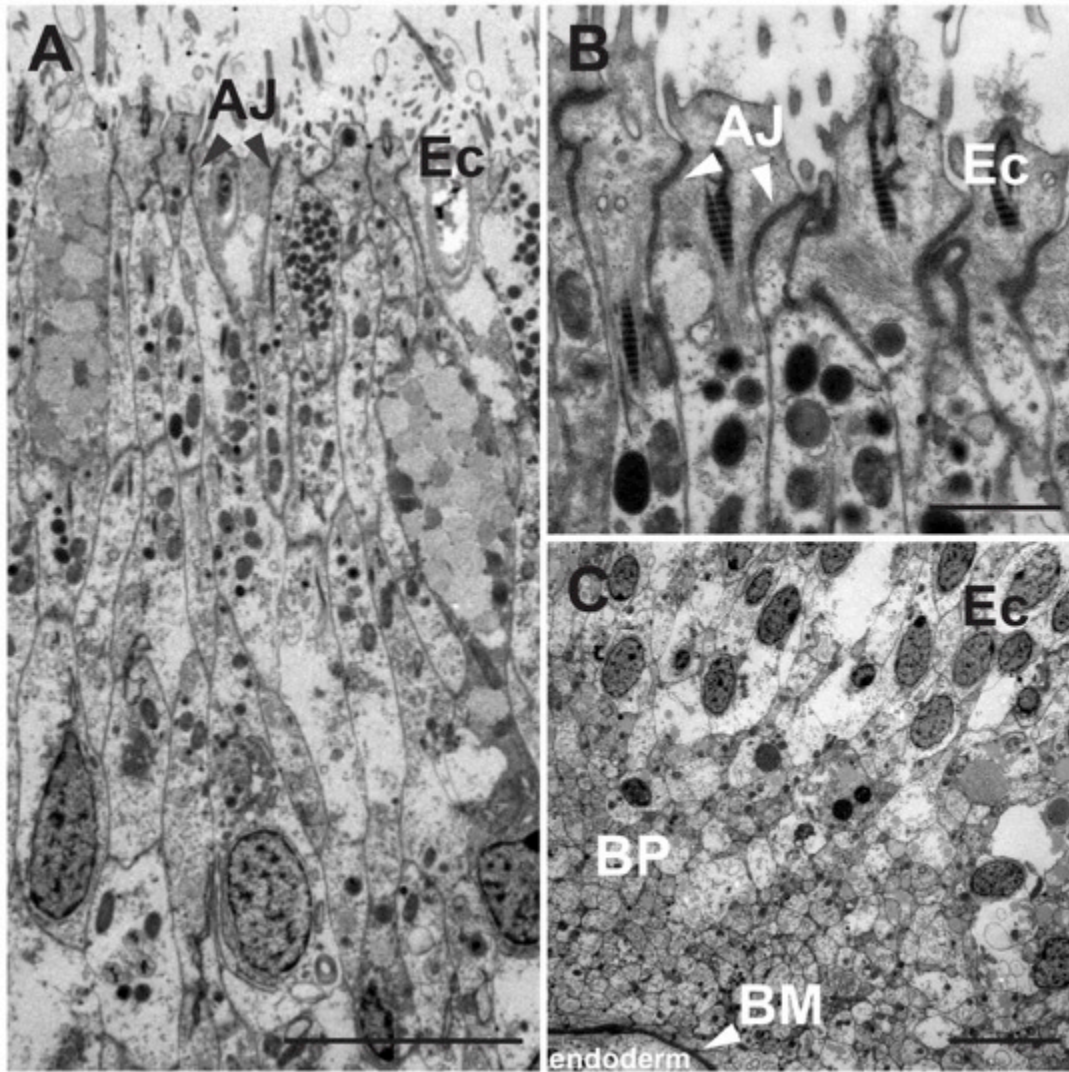

**Fig. S5. TEM of the ectoderm of the apical organ.** (A,B) Apical side of the ectodermal cells of the apical organ. (C) Basal side of the apical organ ectoderm. AJ apical junctions; Ec ectoderm; BP basal protrusions; BM basal membrane Scale bar A,C: 5 µm. Scale bar B: 1 µm.



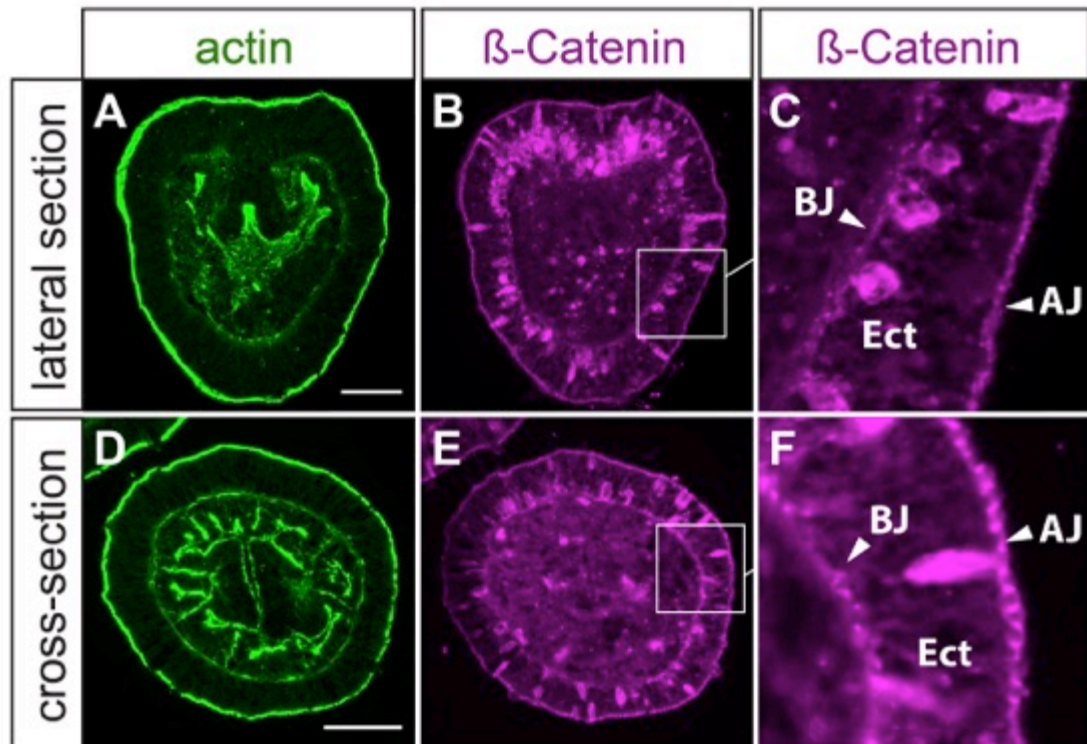

**Fig. S6.  $\beta$ -Catenin is localized to the apical and basal adhesion junctions of the body wall ectoderm.**  $\beta$ -Catenin antibody and phalloidin staining of vibratome sections of the 4 day old planula to exclude a possible penetration problem of the  $\beta$ -Catenin antibody. Please note that in vibratome sections, the  $\beta$ -Catenin antibody detects the basal junction in the ectoderm, but has a tendency to show unspecific staining in nematocytes and other subcellular structures. Scale bar 50  $\mu$ m.

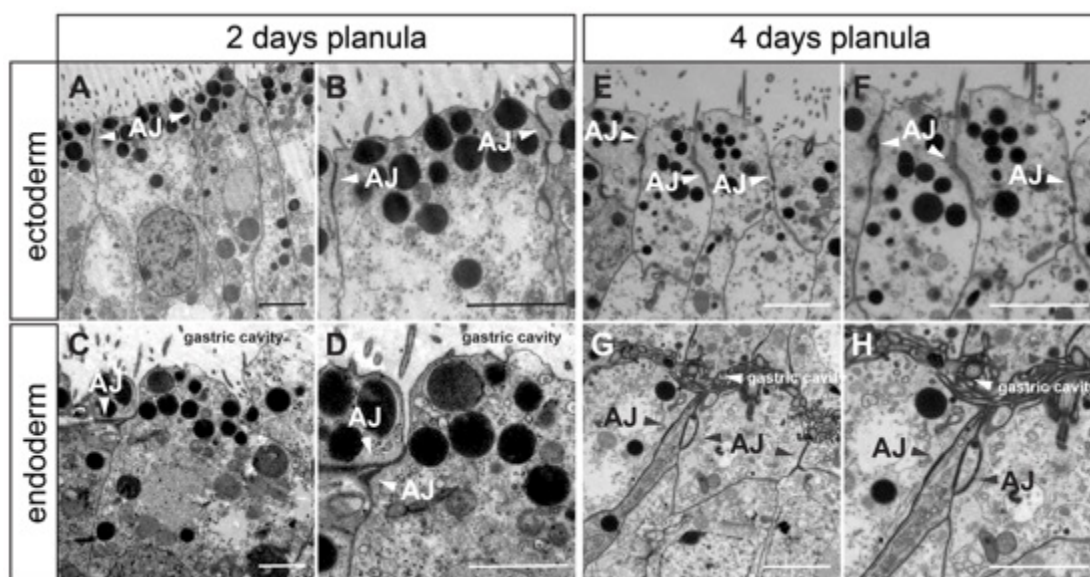

**Fig. S7. TEM of the apical adherens junctions of the ectoderm and the endoderm.** (A,B) ectoderm, 2 dpf planula; (C,D) endoderm, 2dpf planula; (E,F) ectoderm, 4 dpf planula; (G,H) endoderm, 4 dpf planula. Scale bar 2  $\mu$ m.

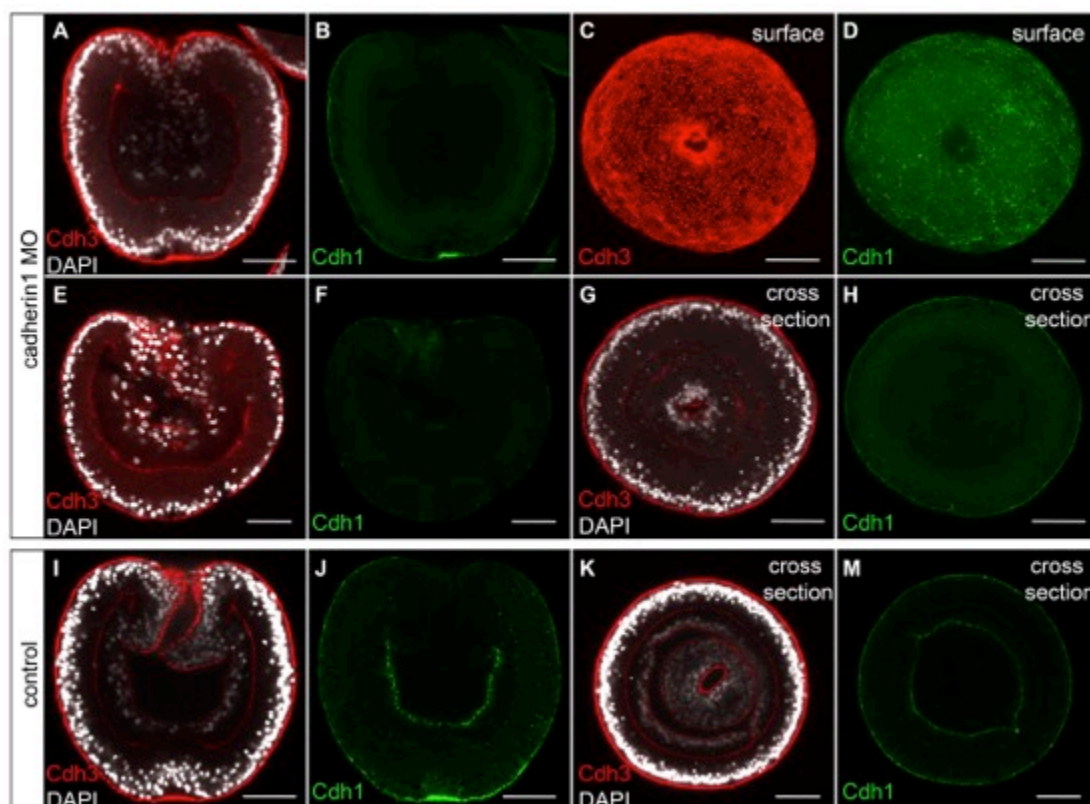

**Fig. S8. Cdh1 and Cdh3 expression upon Cdh1 MO knockdown.** (A-H) Cdh1 MO injected planula. (I-M) Uninjected control planula. Scale bar 50  $\mu$ m.

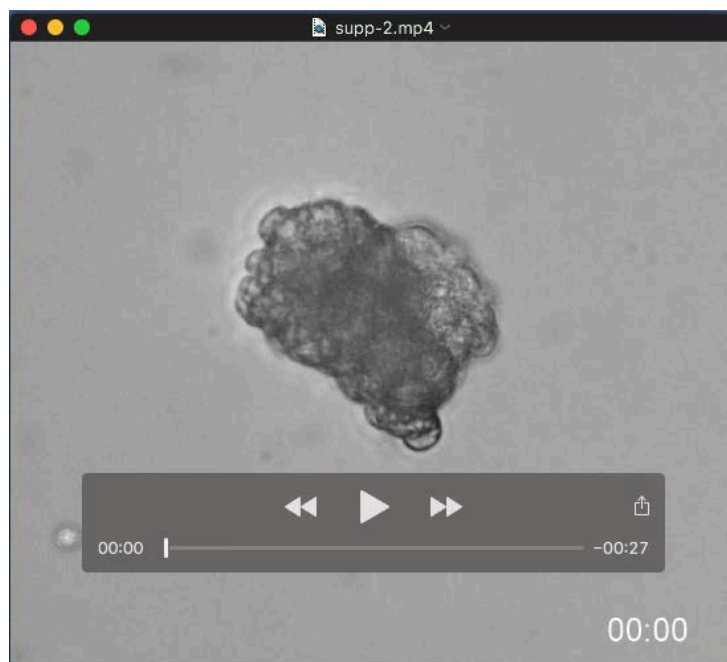

**Movie 1** Std MO aggregate development. Time indicates hours and minutes.

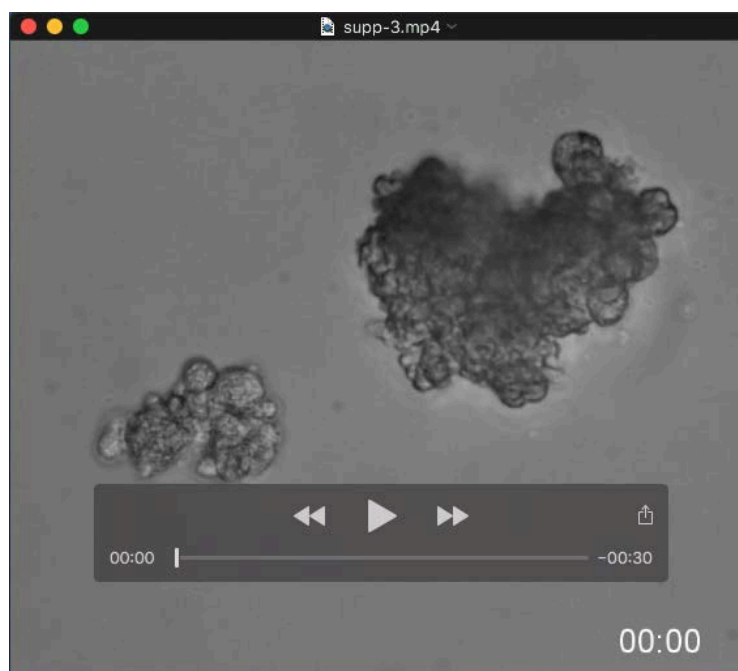

**Movie 2** Cdh3 MO aggregate development. Time indicates hours and minutes.

**Sequences for Phylogenetic analysis of Fig. 1 and Fig S1.**

>Strongylocentrotus\_purpuratus.2\_spu\_WHL22.504363.0\_e\_9.3e-55

MAVNLRWNRTHNLCLSVIYILATLQLTLGLALPRINVPSNALPGFKVTEVKKS  
GQFSELLSDSDVHNLFQIAENGALAIKNSLEHLANSIALKVRHTLRGQSWDD  
LLNLHVEDTSLEFSKKSIRGYVFESHEAIQEVMLDQLQIASTKPVSYQLAGE  
DSANFRLQVNPEGRVQIFTSVPVDSETTSQFHMEIKASAQDLLGNPPLMSLPA  
EVTIIVRPLSNNFRPFGDDIMYPPNEPVKMVRVRRDVLPGESVNLTESTAMDT  
VVHTITETGADLRYAMGTPVNDKFSIDEMSGDVTLLQSVDYEAYSTNPQEIL  
NVQITNTSDPDALDVLVTFDILDADDLPVWTMPVYPYIAVVPTDAPNQACI  
YTLEASDQDLGSDITYSLRAGGDGAFTVGETDGCVYTAIVSGFPGYVQDLEYI  
LSVMATGTSGSFDGGVTGTVRVYGGSYPPQFSQEEYSASVLEDQANQAVIQV  
TASSFSRNPLTYSIVGPENRPSHTINANDGTITLVDAILAEDLLSYFLTVRATE  
QVVDGLSSEVRVNMVEDVNNCVPTFGQDILSFNDVLETTAIGEPVGTVTAT  
DCDVGPNAELTYSITTPNSGFTIGSDTGVLSPAVALDYEEGDRYYTFAITATD  
GGTPQLSSTATVVISIANAPEAPYFTPPSYRFRMDEVAQVNYEVGTVYASDDD  
VNDVLTLSIDGGDGTFRIDQFGVISVARAAVESSYMFVVASDIANNEANAT  
VEISVTDLNDNIPIFPECDNYRGEVSEDATIDTDVITVTATDSDQGSNAEISYKL  
SSNSDASRFFRVDQRGLITTNTLLDRETTAVFEVTVEAEDDGNPALTGFCTFT  
VEVTDVNDNFPAFPFTGYQTSISTSAAAGDEVIEVRADDLNLNSDLTYSLSAA  
DGGEDTGYFTIFPATGSIIVRQDLPLIEFGSPNEQDCIVTATDVGGQATDVP  
VQIDVRSSDDDTYQVPTFSATSYQVTINENSMSQEVLLVSVLGAAQVGFNIIR  
GSRPSTNYNRNFGLSNDDDEFTSSYITVLEALDYESVTRYDLIVTARYPNSPYT  
VETNVIIDILDVNDETPIFPAFTFYGNIAENQPLPNLDPVITLEATDSDVTPEFSQ  
IVYSIDGDQTDFRIDENSGEIFAITEFDREAVAEDTIPLTVIASDGINESRATVFIT  
IVDENDNQPEFNGTFSFDVSEDVEMGYEIGMVTATDADISEDLEYFISGGNVG  
GAFTVVANSQVIRKAGVLDYESQTSYSLDYSVNDGFNTETTTVVVNVINVND  
VAPQFGESSYSATVLEEDSDIPRVLLTVAATDGDADAVADAVVYDLLGTG  
AGTLFTIDPQTGNITLTGVLDRREEIPRYVLSAMATDDNGNGLSSYVDVIEVED  
INDNFPFFPDQEYVGSVDENMPPNLTVLAVVAEDPDTADNLVYSFPIPNSNFN  
IDSGTGEITTAIQLDRERVSEYELEVQVTDGTNTATTPVIITINDVDDNRPVFTQ

DPFPPASVLETEPVGTTITTVQVTPDPVDHMDKVVFTINSGDDADLFRIVPDA  
ATLSGLIQVNKPLDFESGNANDFTLTIQVEDSQGTIGTPQTTTIEISIENANDLA  
PVFEEDMYAGAVSEGADVGSQVGTFTLTATDGDEPGGVLNYVIDPSTDPEGQ  
FGIDANQRLVVASPLDRETVASYELKVYAVDNGDPPMSGTATINVVIEDVND  
TPPRFAEDYTPSVKENS DAVA EVVSVRAVDDDDPASGPPFLYRVAGTPNEWT  
DYFTIEGLGTETSGDITISTSGRAIDREAIPYFDIVFLIEEVNTDELLTGTQTL SIM  
VTDVNDNPHLAATKNILVYSYEGNIPTTGVGKVAVEDPDILEDKTYTAEGEFP  
DGFQLD TDTGDIVMLEGTPAGIYTMQVMVSDGGMFPDVVSTVIVTVKDIPQE  
AVFSSGSIRFSGTTAEELIDPNAEGVSKLDSLKVILAE AAGA QLENFDIFS VLN  
VEGMERTVDIRYAAHGSPYYPADKLDLAALS VSDQIAALGLDIAQLPVDLCV  
KENVCESSCTNVLVVDPTPTVVDSGSASFVAITSVLQAQCICGARTEAPGSCD  
SIPCLNGGTCVDVHGGTYKCECPYLFDGPNCCQTKRSFNDGYATFSTLRQCE  
ETSLSIEFITETPSGTLFYNGPIQPTEVDDAIDMILLELTNGKAKLTINLGSVDGT  
TLNLELEVPKDNLGDGQWHRIDVYRNGRSVEMTVDRCEDAPFAETSSSSTLD  
TSNCRSSGETPGENKFLNVNTPLFLGGMSPDYNPDVVVPGGFDGCIKNLVSD  
GFLYDLADPGIFDKSDSGCLRTDGQCTVDGEPVCENGICEADLGSFVCICFPG  
FNGEFC SIVLPPYDFATDSYITYELLD ESYNDARSSNYHIMVRSRQENGLIWS  
ISSANTY EYIRMEMVAGELQADWHLGDKPVSVTMGNFSINDGAWHAINFDR  
YDSVVTIKIDGGGGVKEIQNRESAFSGLDIDSNSLVIGAFVDLNTVTD DFMGC  
MNDPRIDNNFLGMEGSNEYATATQSAGVSEGPCSEVCDSNPCPGQDLVCTDY  
WRFYECECPVGEELSGPETCLAIIDCDPNPCYNGGTCTEGVPTGFNCTCAPTY  
YGTQCEATIGGQGASLGITPLGIILMIICILLIILLGLVLYTRQRDRKSALTF AI  
DPEDDIRENFINYDEEGGGEEDNDAYDLSTLRKPVD AISAGSIEKKPAMPVSE  
VPVGNRPSGVDPNVGDFINDRLKGANDDPEGPPYDEPHVYDFEGDGSSAGSL  
SSLNSSSTESEQNYDYLN DWGPQFRKLADMYGS

>Strongylocentrotus\_purpuratus.1 spu\_WHL22.66143.0\_e\_2.9e-13

MASSKARSGGVGGRSCHHDKCEMGDGEVSFSQGILMSSVSGIIRTKRTHGCL  
VHRKMALSWRVCIALLVLWALICARTCSAQQD LLYSVKENQPVGTFVGS L  
QDDTSFGSPFTTLNPSAEFMIESDTGIITTGAVLDRETAPDQEFVIIVFAGEMFT  
ALVVTIRLNDTNDNNPIFSQDNRTFEVTEAVQPYMTKINGVTATDADEGINGI  
QGYRIVGGNIDNTFDLDRVRETGVYMDIVVNKTL DRETISMYTLIEAYDGG  
DPRLTANTTVNIKVTDVNDNSPVFTLTSFTATINESAPVNTTVLQVTASDEDE  
GLNGEVVFNLRDDGFFRIDPASGIVYLNKVLNYEDAQA HDFLVIAQDKAEP  
PMSSQPAYVSIMVININEKPPSLEVLFLPDGGASQVSEAAVADTTLARISVTD P



DDGVLTNVSMITITGGAGQFDLQKNSNQVYFLIVATTASSFDREEVASYDISIR  
ATDHGSPPQHAENLTIAVTDVNDNPPIFDLPLYHATIEASEPGTPVKQVHAT  
DADEGVNAQIIYRISPEGTDYSDWFEINPMSGLVTTLQKVDREETGSVFLTVIA  
SDEGEISLSSSVIINITITDVNDNQPVFFPGSYNASILEEQEIPYCFLQVNATDPD  
EGSAGQVTYSPSTDLVPTPSQFSINPLTGDLCVISRLDRDAGQEEYNFAVKAT  
DGGGLMSHAFVRVILEDINDNVPVFTSLNYRGHIEYDAALGTEVKLVVAEDR  
DAREFGRVTYITDSSNDGTFAINQTTGLITLVGSLDWVQHPVYTLEVIATDG  
GGRTSANHAQVTITVAGPDTSPPEFESSYAFSVQENAAQVLVGAVKAGHIDP  
GITFPITYTLTSGDPNDFFRINTTSGEIFTRGSGPDHEQQAFVLITIQAAASGMPPT  
YDDVQVNITVIDVNDNVPQFMAQTARTSIPESTGIGSSIIYVATAMDLDSDGNG  
LVRYRLTSNPGNTFRIVEATGEIILNKEVSYNDQLSFEVDIQAYDAGEPSLEGS  
LTLTVIILDVNDNGPVFTMGFYVPSILENLPSTPVPVQVEATDNDRGANALITY  
TLTPNNDSPYFAVFPREGWLYTRQVLDRELKSTFTLTIMASDSGSPQNSSAT  
VQVTVVDANDNAPHFTKKSYPHFHINENLPAGTEVDRVEAVDPDLGPNQVT  
YTLSPSGDFTIDEEGVIRTTHPLDREAAYSRLIIRAVDGGNPALSSSATVYINV  
NDLNDNAPVFSQDRTYQASVREEQPAGEFVAWIIATDTSGLGNISYSLIDS  
SPKFIIDSSGVISTAAAIDREDESYYTLTVLAQDGGNPPMQATASVRVRILDN  
DNVPIAAMSAYIFTADENIQPPTVVGVSASDMDVGDNGKIYYYITEGNDFD  
VWDVNHSSGEVYNVRVVDYEMAAHYTLTIIAQDNNVPQTHSTSISVTINILD  
QNDNTPDFDQDLIYTLQENVGINHVLWTVSATDADSGANGLIRYTLTEQDF  
FAVDEYTGTLRTIQNV DHEINHVFLLVIQAQDQAINVSARRAATSTVEVRIYD  
SNDNNPVFVSRSSDVMEDPVGFNVIHIIATDEDSGENGRVGYTITSGNEDG  
KFSLDAVTGLLTIAHSLDHEHKRDYELVILATDHGTVQRMATQTLTIRVIDVN  
DQPPRFEQSIYVMNVSESQAPGTYVGMVVAIDGDSGVNGRITYELPEEIARG  
MFRINATTGEIRTKAILDREQRDSYVVTVYAMDGAFPARYDMATVLVYVMD  
VNDNNPTFAPPTFDITLPENQSPGVIHNAIATDADEGPNGDLIYSITGGDPKNA  
FSINQSTGAIFTVGALDREDEATYTLTITATDQGTSPRSGTTTIRVTVDLNDN  
DPVFGSMSYYKSIPESTAINATILTVVATDDDEGLNGDVYYTLDNTTIGLFSID  
PEHGEITTTGKFDYEKETRYTFQVTATDSGVFGPRSERVQVIIDISDVNDNAPV  
FKTIPIRANVTQDASSNTFVANVEADDKDSGVNGEVNYRFTQQSSSFAIDTVT  
GVITTKSLNPGTLFYHLEVMAFDLGSPSLSSNGIVEVWVGTSGSGGLQFGQQT  
YLVQPSEAADNGDVVLSLSAFLPDGSSSNDIVYSLVSGNENGAFGIQVQAGGS  
AILVVADTTKLDYETQPNIRLVAEAMRTPENSSPMYGYATVQVELTDANDN  
APQFVQDRYQSRVWEVPNSDIYVTQVSATDADEGTNGAIYYEVTSGNTDNA

FAIDHVTGIVTTAKSLDYEIEDSYVLTVVARDGGSPQLTGTATMRIGIVDVND  
NQPVFVQMDPVSVSEDLGVGLSVTTVTATDSDTNPNIQYSFTSTGNPPGGYFAI  
DQYSGIITLARS LDRETQDGYTLELEATDTEYTTTMTLEVIVTDENDNAPVFR  
QESYQVTLPELTQPNVAVVAVNASDKDIGLNAELTYSFVDSHPSFYIDPITGVI  
FTNQVIEFNDVETTIQLYVTATDSGAPALSEFVTVRIEITDVNNQSPVFVEDIYS  
ASVSENVSLGHHVITVVAEDMDLSPENSKINYFIESGNDQGGKFKIDANDGSIT  
VLERLDREATDTYTLIIGAVDNGEPVNNATAE VVIEVEDINDHSPIFDHVQYE  
GRIAENATASTYILTVHATDRDIGYNGEVEYSIISGTYSDLFAIDVVSGAVTVR  
GELDREEVERVEFTVQASDRGMENQLASVVLVTITITDFNEFPYPQLFYHF  
LVPENMPVETYVFTAGALDNDAGEYGELTYSIRGLGPSNGDDYFTIDPVTGE  
VFTA AVFDYESANSYRFVVQAQDTGGLSISIQTEVNITSVDEFPPMFNDQEYY  
FEIGDGADAGDYVGQVTATDADGGEDGVVIYSLTHEFFYIEATTGIIKVAKPL  
NSSARKRRGLEDRFTHRSRREIDLSAQSNFALKIIASTGKPGTLIDDTTAAVSV  
VNAASSIPVWIIAIVVVAIILLLFVVIGIILVCRQRRRRRKEAQADKRSVAGS  
MSPRSYDVTFDPVEMGAQGMVNHGMNSSGHFPHRQLYGIPGSGGGMGHTNI  
SEPSNSASSGRGSTTMEDEEIRRINEGGTGAPKNNIREKVIDSGIAQDHEDGSV  
SDVNSPREKHLNLYLNSTSVESMHVFGEEGGGEAGGGLDIGHLIYHRLDEVGA  
EEDDAIMDGTRLF GFTEDGHPSMAGSLSSIVNSDEELSGSYNWDYLLDWGPQ  
FQPLAHVFAEIAKLKDDTVAKRQMTDPRLQKKSLHANVKNYPPPLLTNTPQ  
GPIKPVAQRVMNNTSMSNHSQHLPRSPVVQESAFVPAVVSPDLSPLSPLAPG  
SSLSPLVTSTGVSSQSSRVTS GTTTPQRMHYGGGIVFTHPTANDDEIQI

>Capitella\_teleata.2\_v1.0.pep.all\_CapteP226654\_e\_2.5e-54

MTFFEQGSNPVAVRDEQPVIKLT PVNDEVPEFKNLPRPFLATVTPNAGPGTF  
VYHLM AHDADVGSEVRYILESGGEDRFEVDEETGVVTRTGTEPFPLDREYQI  
GVSAQDIRADYLQKSPHSLKILVGERDPQFFETLYRAKVPETASEQFKILEVK  
AHSHQQYPITYELTTESGGQSNEFAISQTKGVVDLLRKL DYEKDMHQYHLRV  
KAVENGRPTRTSTLIVDLIDMNDNAPMFPLSQYIMHGIAETASIGTDIMQVTA  
TDLDSVTNAQLTYSVSDSNFSVQTLN NIGYIRTA KRLDYDHIPNHTYNFTITAT  
DNGTPTLTGSAVIRVSVDNVNDEDPVFTQKIEHVQVSEDA AQNTVVHVMQA  
YDPDGDDVTYSFPGGMNSGPFYIDPKSGIITLQGPLDKSRVVYKLNVTAVD  
NGRCCGGATSRRSKALVIVEIKDINNNAPRFPECSSYNPTVLEKEDVGTSVVQ  
VRAVDQDSGANGNITYSIVKSNDQSSERFQIEPTSGILRTADIFDREGQIGVTG  
FGVTIKAKDQGNPSLAGFCTVRVKIGDTNDNPPVFNLP EYSTSIEENS VVGKR  
VKQVYATDRDAGDNGKVG YFMESDPSGFFAIHRSSGWVTVARPMAGREHV



TIIRAQDKGTPSKSTTVSMDIQITQTVNAYPQWVEDYSSTPLSLSSENAPVNTV  
VKTVKATSSIPDSYVNYVIQPGEAPEQNSLRSFYRIDEEDTNEMVLLTYKPLD  
FEALSSYTITIKAANRATNSLHNDTRLVINLVDENDEIPQFIGLDENGRYAGSV  
AENLNPGEVITVTAMDRDEFDPDYNKKMARXSDRPNHYPPGTPNQGEAEVQI  
RVTDMNDNTPFFADRVTARVPENS DSGAVIITVTAKDLDEENRLTYSITGGN  
VGNAFEVVPDVGEIKVRGNLDYEEGPREYHLEYRVFDDKFSNNTMVVIEILD  
VNDNPPRFDNAIYNESSLFEEEPGISMNHPKYLLTVRATDPDTSRHSKIRYSLT  
GQFAEDRTFMIQEHTGEIYATRSLDRDAPYGRP VWNFNVLAQDEVGTGQPSL  
TG YAEVRVMPRDINDNAPVFDRNRLIGSVPENSRARMTVLTVIASDVDQGNN  
GSVHYSLKQVQSRGNQPLFSINSHTGLISTMLDNVLDRETEEEYNIIVQAKDK  
GSPPMSSSAVVTIVITDVNDHPPKFTQPIYKATMSENYKAGASITSVSATDKD  
MGIHARLTYILNTQDRKYFSMTSVEATNTGV LKVFQPVVDYDTLINPVFNLT  
TVHDPDSRNNDTAYVEVRVTDYNDNPPQFVPNIKRVTIHENTTKD TTYRFT  
ATDRDTGLNKLKFKYSIDRLTDPARQFAVDANGLVTISAALDRETEAEHRIHIL  
AIDEGDPPMTGTGLIVTLLDINDNFPKFAEAYRPV VYENLPPGQKVIEISARD  
ADTARHGPTDFDFWLPCGGGCPCKANPTCGKFSFKFVQGGGDQGYGSGIITSL  
VTFDREEVKEYHMPHMKDSGNPPTSGTNTLTIVIGDINDSKHHPAHKNIFVYN  
YKGEFENAALGNV FARDEDDWDVSNKTFTMVGEDMDVHFRLDRNTGQLFM  
RGRVTTGEYDFKVRVYDALWQREVISTVTVTIQEIGDDAVLSSGSLRLQGMT  
AEEFVDRPMLQKTGHFGLSTYDILRREIAKKLSVPTGNVDIFTVVNHPTLPRTI  
DVRYSAHGSPYYQPSRLDGIVNLNKNEFEKILGLKIVMVPIDE CVKEVCESGG  
CSNRLVTTPDPLLINTNSTSIVGVTA YVQADCVCAARTFDESSEGLCTPESC  
YNGGTCNQREADFFCSCPRGFEGARCQQLRHSFN GNWAWYKPLAQCD  
HTSLEMITSHANGLILYNGPSTTPSDDQDGFILLELRNGYPYLRINHGSGETQ  
LAIDGRDRQGRVQLPRLNDGHWHRIDVFRAGNEVRLVVDQCRVASLTETSG  
NMADRRACEAQSTTPSDNQYLVHSPLELGGRSHPDATYPERTMKEGFNGCI  
KNLVHNGELYDLHIGRTGEHSESHDACPDEDSLCS SHDLTAPKCGAHGTCIA  
DIRGKTSYCVCNPGFRGKYCDQTTTVKDFRDN SFIEWDIKDDFY LAMEKELF  
QTQLQLMFRTRQSSGLLFKAQNAQKSEYLMLEIVDHIIRFRYNLGGGQDIVQL  
SHVQVSDGQWHTVYVERIGQWVTLKLDAGEGRYFNETLGQHKGHLHVRISQ  
RSLFAGGDVRFSSNSDPLVDYDYRDSMNDVRFNGEWMPMDEQENAY SIS  
ANFLTRSRNLEDGCESTACLTKHCPFLTCFNFWR YAECRCPLGQEFREELNI  
CENINECIQNPCYHGQCIDQSQGFVDCYNGYSGELCAATQESATALMSTGAI  
LVIIICALVLLL VILLFIVYTRRRRPDSYVVGVD PDDD VRENIINYDEEGVGEED

QDAYDINRLKKPVNDIGSPKKMPDSPLKSAVPPPVTEKSMPPPQREPPRRRIAT  
PKGENPDVGDFIKNRLQDADDDPYAPPHDSVREYAYEGGGSDAGSLSSLAST  
ASSEDQEYQYLNNWGPRFTKLADMYGGQKK

>Capitella\_teleta.3\_v1.0.pep.all\_CapteP226653\_e\_7.8e-50

METHFPLLVLLAILACASARSTRAIHVVPRTASPGYVVTMLQDSPRFYGSHSQ  
VHHHFKILPNGALVTQRRLPSTLDSSFFIRLEHGGEKEWRESLNIQLSDDHVR  
GGFPHQPYTAHVTEEQPANTQLTGLETLSDDAHMSIDCSISIHDSRAPFSLYR  
GRDGALSIVTSKSLDRERKQEYSLTLKAVCPNKKDIYAMVNVRVDDVIDNAP  
VFSETQYTATLIPDLPQGLPVLQLQATDADSEDELVYSLENGDFEFVVDSTG  
VISIKTSYGLEPMTYDLVATVTDLAGQSSTASVVIEVLPDIPHIRTRRETLDRR  
GWVVRRTDTGELFTVASIPANEDERFEMQDPSPDNLEVNYESGMVRLIPGAD  
WPNEDMVQFFVNISHASDPQYESYLPVVIHLIDLDELAPIFTNLPQPMRTTIPI  
WIRPDTIIYTVESIFAQYDDVKVQYKLESGGDGWFRVDPETGDVLIVGRHEFE  
EVSYSLGISAQCIGANPREDMTPSQELQVIVGVALPQPYEHPYHVFMPETTKP  
GERVVLVQAVSFQDAPLKYSLSDDPRALNTFEINEDTGEVTLKEKLTWVSA  
TQRYFHMILKVEEKAENIDQAFSDDFEITLQAENMNAPYFALTNYVVPNILES  
VPVDTEITEVIAIDIDPLDYGVVNFSSDPHFTITTDGDNVGRMVTAQELDYD  
YQEGHMYSVVVTATDGGGRTGETTVQVYLDPSNDKAPVMDPPEQRAYVKE  
DAGSLVVHIVQAYDPDGDITFEILNNGEISEYFLLGTTSGDLSLKKRLGN  
SNDNFEIQVRISDGENSVDGVVVVDIIGVNHQPRFPECNSYEPEIAEGSEIGTSV  
IRICHNPWGKEASCPEPNMRAEDDDPGANGNLHFSVVTPYNEAKWFEVEGV  
EGDEKSVDLKSLREIDREDLLTQRPNEVLVLGNTVKFRVTVKVEDEGQPPLST  
NCFLLDVIDDQNDNIPIFDEANYKTTILRNTNYDDR VIRVFALDDDDGNNAVV  
TYDIEDSEPCDNCFTIDSSSGWISRGSGNIGSGVNSITLSVSAIDPDP SHKALT  
DVVIDLTESSDLPPQWSDVGGIPIDDLTSIKVMENTTAFTSLSVNFEATASGN  
MVGYFLVKGRTP EQNKNRGF DYRESNQEMVIHNLQLDYETTHSYILLRSYR  
RDPGSSSIPATDARLLVELEDVNDNPPEWQGRDNNGFY PASVSDQTQPGEHV  
VTVMATDIDGTSPNNRVS YGFVDTCTDCELFNLD SNTGDITAKEGGFDREDK  
EQYYLRVYAEDGAQSSNNPPGPNRIETAIDVLVMGPSMKPPYFPQPSYTVSLD  
EGIPFNTTVDDTIL AIDQEPGMTYMQYAITA QSNVDRKFAVDMGAGRIYTVG  
ELLYDEQESYTLTFRIFDGD TVNSTSVNINLVKQNL YPPVFEPLEIEGPPVEEK  
NPNTSPTNPHYLGMMTARNPDESSPIQYSVEGALTEGDFSGQFVINNTGHIW  
LTRGIDRDYPYGHSTWSFN VAGTDDGVP AKTGYGVVRISPTDINDNAPIFDTC  
CLAGSIDEHESVSTTVMQLVADDYDNGPNGDVIYEAVTIPEDEDGQPLFAVD

SEGIITTLQLDREDVSEYVLIVKATDQGDPLSSENQRILITVDDTNDNPPRF  
PEASYQHTMEENMPIGSSVMQVVAEDLDIGVNALLDYSITTPGDGDYFFMDS  
IFSTRAGVVKIHENGENKELSFTVRVSDGVYTDADIVISVVDVNDNPPEFIPE  
HVQQNITVSEGEVDYFVVQVTAEDVDENENGEFEYFIDYMNTDKEFKFKV  
NEDGEVTLRNQLDRETVDVSYELHVLAIKGEPAITGTATVFITVLDVNDNPP  
MFRESYAPVIAKDLQEGMEIIRFYATDADLPENGGPPFEFVNSCNTPECTDLRFE  
FEQDTSGGGEDAGIVLSNRNGFSREELGRSSYELTITMSDNPTSGEASQQQTY  
TLRLTIEDDNYNMHSEGTKLVTVYNYNGELGSVPLGNVFEVDPDDWDLDPK  
TFTFESEQEWFRLDQDSGQLTMKMGAPPMTHEIICDVFDVKYNQGTAKAFVY  
VDVNYIDKEVTDSAGSMILSGITAEDFIRLEKVTSAKKTANSGLPGSENYL  
DAKYTLRLRNKLAELLATKPEYVDIFSVQDVPGETEKVVFVQYAAHGSPYYSPS  
RLNAIVWTNKDSIETEVEGITVEYAPIDMCRKEFQDCWDSGCTTVITPTADPAL  
VNANQTAFAAGVNSTVEQRVCATSDFTDDAPQCEINSCMNGGTCQETWNGF  
SCECLAGFEGPRCQLTKVNFDDGSGWAYMEPLQQCEDGKLSLQFATASGNGL  
LLYSGPMRDTEASDMRDYLALTLSEGYVPLRANIGDDELTLISGNNKRGQK  
TLSAMNDGNWHTVEIFKQKMLSLVADHCSVAEVTETIDNSIEDRAACEDEG  
SFTGEQFLFMHTPLELGGRSVGGVNYPSGIPSAGFDGCVKNLMYNGNVYD  
MKLVNRTQFQGANEGCVREDCTACPVNSVCHGNFNANPQCICIDGFQGGQD  
CDTEVTTIDSHDNPSFIEWKVKNQYNDTLTNIKDGALRLMFRTRRETNGVIFM  
ANSFSTLERYRLEVVDShLTFRYDLGAGDRILSLPHVDVADGLWHSVHIERY  
GTNGVMRLDGGEGKYYAEQPFLDQHRWITIDEDLIYASAAVTYNVYTGEAY  
VDGDLIHTCMRDVRLMENTFPMTEDDEADSWANIQRIENMDYDCESDACVN  
VACPEPQFCYDMWRYYECRCDDGERKDEDQCIPVTDCSIPICVNGWCALTED  
GDRYCYCKPGWEGPICNMTGPEAFAVVATISQGAVVSIVVVIIAVLLMILLFII  
FTQRSNPDHLLIDPDDALRDNYVTYEEEGAGEEDMHAYDLSRLQKPVDPNLD  
PMGLRGPPEPVRRLVLPQEAPLPLGAPRKPFPMSGDPDIADFMDDRLHDT  
DDDPNAPPYDSVREYEGNGSVAGSLSSLNSSSSGGDQDYDYLNDMGPRF  
KKLADLYGGGGEEED

>Capitella\_teleta.1\_v1.0.pep.all\_CapteP181060\_e\_2.6e-10

MIFQVSASDPDCGANAVRYAVAANLGFQYPSFEVQAETGQICIREVDYEK  
KHTYDFPIVARDQDNLDTTALVMIVVQDVNDNSPVFYPTQYSVSMDLDTVAI  
SNQVVVKATDTSGEYGTVMYDIVGGNEDELFEINRGTGMISLTRTTDLSP  
SLHTLIVSATDGGGISSNVRANVSVSLRDASLNPPEFTSSLYRFNVDEDAGILT  
LVGVVEATGRNVIYTILSGDPQGLFHLNPNTGQIRSEQSLDHDTVSSLLLNIAQ

RGEGINNGPPVYGNAQVNITIDDINDNTPEFAVTTVEIPVKEDMRLGSTIYVV  
HAFDADSGDNGRVRYSIQDPNDIFEVNSESGEISLKRRLDHEMTVRHEFMVH  
AYDLGPGDNQASMTVIVEVQDINDNAPVFEFSSYVFDVSESRKANFKFGEVQ  
ASDADSGNNGKIRYQVQNGQNVDVFGVFADDGFLYNRVKLDRERRHEYSFV  
VLAVDNGVPSRSSASVTVRVLDANDNDPIFQNIPIYVFQITENQPPHTLVGVV  
SATDKDETNQLIYFLESSNQYFSVNAESGEVLSSQQLDREERDLHSLTIIVSDQ  
GQPSRTSSVDVKIHVTDVNDNPNRFDKEGVFVAYINENQPADTLVAQITARD  
SDKGENASITYGFYEGGPDTHDNTAMFNLDTSNGRITTKVLDHESKVQYVF  
KLLARDGGSPHRQTLKTVEVIVEDQNESPPQFDSAHTYFSILENTAPGTIVGN  
VTAKDSDSGENARVTYYIVRGNLFGTFGVHSTTGAIIVSRPVDFECSRYSLQ  
VRAVDSNTVNPMSIINVNSIIDVNDNSPYFEDNPVITIRENIPAGVHIYTFT  
ALDRDSGDYGRVQFEMVSQSPQNDWFTVERNNGHLKINRQIDFEETKQISIVV  
KAEDLAKNVSGRLATTVSALIIIEDVNDNSPLFQTRNQVYVLEDEPVGYPVM  
HIVATDADSQDGGRVSFDIVSGNDHSHFSLDSSTGLLQIAKPLDREAVAQYLL  
NISAYDHGLPRRTTYMKLTVGVIDVNDSPVVFQHSVYKANISESAVVDTVVT  
TVHATDRDTRDTNAELNYFIPDGVISNQFTIEQSTGVIRSRIGFDREQQSSYVITA  
YVKDGAFPALYDTATVLVDVLDENDNAPIFQVPLVSLEVPENAHLSVIHTVV  
ASDADYGVNGHLTYSIIGGNTDNKFTLNSTTGQLSCRPLNREQSSLHNLITIEA  
KDGGNPARTSVSSILISVIDDNDNDPEFLLDGYTAEVFENIAGVTSVLRVQAV  
DADVGVNAEISYSINNAAQGQFSINNITGVLSTAGEFDREKIAHYSFEVYATD  
GGLYGPRSESVRVEVTVKDINDNFPVFTQYPYRQEISQDLGVNQRVLQVSAT  
DTDADDNGRIRYSFSTASQFFKIDSTTGTVKTRSLGPAAAEVHRLNVLAVD  
QGSPAKSSTGLVEIHVGSALGGILRFTNLTYNVHITEGARFGEHLTRVQARFIS  
NQGSGLIAYSFASGNEDNIFMIHQDTGNITVNEGSKLDFETNPRLRLIVVATAN  
SAYDYTTVWVNLKDSNDNAPKFTQQRYSSTYEGNSRGTYVAQVIATDLDT  
GENGRVTYSITSGNTHNAFVIDPPETGIVKTNILDREIVSTYRLEIEAIDGGRNP  
LSAICTLKVQIIDVNDNSPFFPAYPPVNIHEGIEKGSFILEVTANDRDLTPELQY  
MFASDGNPADAFSIDRYSGKITVAKELDHEVMPVYRLRILASDEIHNATAEVL  
VNLIDDNDNPPVFGQSQSYQVSIPELTPPDVQVLTVNATDSDSDDNARLTYSMI  
AVDGFKIDSITGVIIYTNHTVMFNPRQRDMHLVVTAVDHGKQPORSAAVVRV  
QVMDVNNHAPKFLPSTYSTSVAEDTKAGSTLLTLTATDDDDLHVNKVIYYSI  
VSGDVESVFQVMGSTGEIVLVGVLDRERRSKYNLVVMGSDRGEPLNSTAPV  
TITILDINDNTPVFNSSVYHAQVPEDIAIDEDIVKVSAYDL DAGDNGRLHFNID  
SGNDDNKFVIDRDTGVISVRITLDHESRDMHKLVISASDSSPVSRNSAFATVVFV

NVTDVNEFPPIFPEGLSFVNLQENQRIGSHVFTAHANDRDSGIFGITQYFIVRD  
KDQSAKENFVINTHTGDVSTAAVFYYNVSRRYSVRVRAVDSSGGLYADTTYV  
VLIQPFTYKRPSFANVNYDFVVPGNACKGFVVGQIRAMDSGVMVYYSFKNP  
NEYFAINSTSGVITVTQDLIENRQENEIMRENDVVLTVARSQSPTSTYVSEKTI  
AIQVNRSCGECALAQSGSKGTLSDTSLVLLIVFATIAIILVVVIVTMYLRGRER  
KRQPPENSQYDSSSFETIEVPPPPHIGFAPPAYNERYAGHHIHTTSEVSEPSR  
SASSGRGSVEEDEDEEIRMINAAPQQKQALRMPDSGMQDDDAISEHSVNNHQ  
DYLARLGIDTDKINTKVSTAKPAPVASSVESMHYFSDADGGEDVLPVYPAQN  
AGHHPGPHHQTQAFSYGNAEPSNAGSLSSVINSEEEFSGSYNWDYLLDWGPQ  
YQPLADVSEIARLKDDNIKPKTKPTQIVPQRQMAPPLPSSQLGRPPPIITDMPP  
RAVPLANGDSLPSHLSSSSSIANSARTSQLTSVSLPKSPISYESSFTSPAMSPSFT  
PSLSPLRTRSPSISPLVSPKGISSGHSSSGGETPKRRPHKARGIRLVPPSSGSEQ  
EIQI

>Lottia\_gigantica.1\_lgi\_LotgiP174335\_e\_1.6e-09

MTVVHKTVDPVHMTVVHKTVDPVHRTVVHKTVDPVHMTVVHKTVDPVHR  
TVVHKTVDPVHQTVPVHQTVLKVLEKVFYCYHDKFQVSATDPECGKTAP  
VKYFPTGASDLPSVFTLDESTGQICIQSNLDYETTYSYNFLVKAVDLDGLQTT  
TAIKITVTDVNDNKPVFDPSYKVNVEEDFSVGKTILNVQAQDQDSGFFGDVL  
YTIETGNSQGYFDIDRTSGVISLAKSLPNVERTYQLLIQASDGDGVESTNPATV  
IISVIRPNSERPKFEFNQYSFDVAEDVNPSTLVGSVIATTQSPGSNIQYEILSTNQ  
NWFRRINQGSITYVGRIDRETKPSVLLNIQAESGLNPVWATTQVNITIADVND  
NKPEFTIYGDGIRLPVKEDVVVGTSIYGVHANDKDDGLNGTVRYKLLTNPKD  
LFDIDALSGEIRLKNELDYETNDQFLKIVAHDQGTPQQESSTATVTIDVIDVN  
DNVPIFTKRIYDFNVKENAELNSKFGTVNATDKDSSHGGQMSFGFAESPYT  
DIFGMYPTGELYVKRDLREIQDLYVINVVVTDIGQIRLSSTATVRIHVTDAN  
DNRPSFTQSEYHFIEENQQVGSTVGQVVALDRDTGINAELHYSFKTSQNKF  
VINPHNGEITTKTKLDREDQGSYQLEVKVVDKGATPLDGATKVKITVLDMND  
NKPKFQGRQPYSESVLENKPKGTEVIQMVATDPDAAENGFVSYVLDPASTSA  
DGLQNFAIHPKTGWITTKVLDYEQRSRYLLVVIKDGGNPGTDNRAEVEIK  
VKDDNDEAPLFHASKVTFDVIENSPIRTTVGRVQAHDLDSENGRVSYYIMS  
GNVFSLFAVDMSSGEIYSIREIDYEESSSHVLGIKAIDNNILYPRSNNISVTINIID  
LNDNQPKFEKDPIILQTIKENS MIGQVVYTF TA VDRD SGLNGTVQYSIKSETSS  
GPEPNHGSYFTIDSNSGQLKIANNIDYEK VHQISLIVKAQDRCPSPSNILESSVT  
TVVFIMDTNDNYPIFESRTSIHVSEDES VGYPIMHVIAVDKDSNKDKSGNNIIV

YNIISGNEDKHFKLDSNSGLLTISSQLDREKKERYFLNISAEDHGSPKRTSYKL  
LNIHDDVNDNIPQFNNNTYYATVPENTGPGATLITVTAVDNDIGDNGKLYLI  
PEGIADNLFEIEAKTGVITRTELDREIRSAIITVYVQDGGYPTQYDMTTVVIE  
VEDINDNSPIFQSSSYSLNIPENRPESVMAFVAHDADDGENAVLSYSIIGGND  
GHFLINGKTGELTCTPLDREVKKLYNLTVSAVDGGTPSRRGQANVFIQVLDE  
NDNNPVFSRSEYSKTIKEDIAKGEVVLQVSATDKDYGHNGEVTFSLGNDTEG  
FFSVNSTSGEITTGVFDREKKGQYNFEIIAHDGGISGPRNASAIVRITLQDVND  
NAPVFNQVPYRVDVPPNTDANKQILIVGAKDPLGENKCLTYNLQSESGSTS  
LQYFRIDPQTGEIVTKQSLNAGVYHNLKVVVLDNGNPRLSSTGVVEITVGT  
TPNPPLKFKQVHYSVEIREHSPTLTPVIRVSATSSVSGTIRYSFANGNDQIFSI  
DQNTGEIKVANSKLDYEVSQSVRMVVAEQYKNHAYATLQVNLTINDNS  
PKFAQTKYVSAVWESNEPETYVTKVLARDADSGYNGRITYNIIGGNKDRAV  
IDPPHTGIVKTNIDKLDREIRDSYRLVIQAIDEGEQPKSSSCILSISIIDVNDNQPY  
FPPQKPVFLKENMEIGSHVTTVTASDVDPDHS LIYDFSTDGNPENTFNIDRLSG  
RITLAKPVDHEQRKHYMIDIKVSDGLHTDFKQVDINIDDINDNSPDFSQKSYQ  
VSLPELTSMNYPVISVNATDKDTGQNSDITYSISDNPLDSFYIDSNGTIFTKKS  
INNTTDESILQLVVTATDNGRPRLSSMVTVHIQITSVNKFAPIFDEQLYMKNIS  
EASNRGDLQLQVRATDKDNTHHHDDIDYTLISGSTDIFQIRRTGEIFLNGDLD  
REKVGQYTLKVMATDRGDTPKSSTSNINIIVTDVNDNAPYFLEKDYFKILPEN  
FTSEQVFLIVGAEDADIGPNADIQYTITSGNGKGLFIIHGTKGEISIMTGMELDY  
ETDQSHRLIIRAVDCKSCPQEVTKLSAFVTVDINVTDINDSKPKFPVDHYVESV  
YENRPVRSIVFQAHANDRDSGMFGLVRYSLIPGQDSYFTMDSDTGYVRTQ  
MSFDYEERKAYRVRISGVDIGGLRSEANVTILIRDEDEFAPTFIKKTYDFDIQG  
NAKKGDILGQVGALDEDGGEAGKVYFYFKYPSSYDYFAVNASSGVISVARSF  
HEDVPEDNRVKRALKEEETTIVVIATSGLDNSMESTATI AVKIDRTCDGCKYV  
PSTKEEGLSPVVLALVIVVCIIIVIVVIVIAAVLFIKRKRKHAKKAQPEPRQYEP  
SFDQIPPAILHPNVGPPPYRQVSPYDRNIANITSSDISNHSNSASSGRGSAEEE  
EDEEIRMINSNNFINHSQGYLRRKAMPDSGIQQDDDSMSEPSVQNHQEYLAR  
LGIDSTKIGNKNKKKNVAPSVESMHHSDEGGEGDIGIDYNKLTGETDDE  
VAMIDKNRVLDFPNPEKQHAGSLSSVINSEEEYSGSYNWDYLLDWGPQYQPL  
AHVFAEIAKLDKDDNVTPKKQPIRTVPQKPLLNLKLNQVKMVPMPMITNTPPKA  
ISQPASRTSHSSSSSNQSQRASTMDTSLPSLPRSPISYESNYNSPALTPSFTPSLS  
PLAAHTPSTISPAVSSQVNSGPNNGQNTPGRIVIRNGQIALTSASDPQEFRI

>Lottia\_gigantica.2\_lgi\_LotgiP167053\_e\_6.9e-52



MATKKCKLLSVCVFILHSISLHVSSHNFVHQSQYLQEANQPLHANIRHSRHR  
LKREVTQKTVEKSIQETQQNPIFALRDEVTPNSRIFLYADSSRQNFFSVDADG  
NVAVRQGNKLDYEDESMRNIKLFVNATSRRDQSDVIVLDVTIQISNVNDENP  
VFKNQPPFLATVPPNAASGVKVYELFAEDPDQNDVIYAFLTGGENRFEVRT  
KNVFSTALNRNVRVAEILTQGAGNFIKEEYQLVISAADSTNETQVTTATVLVK  
VGVRPPQFYESSYVGKIPEHSSANQFLQNELKILAKSFQGKEITYQLLKGGNST  
QASPYFTIDSTTGVVKTSTLQSSLDYDISPKSSRPPKYSLTARATESETGLSS  
TIDLNVEVIDNNDNSPIFEYSSYQRIIPENYRVNSTILTVKADDDDSGTNAEITY  
SVSDGNFTVETVSDPVSGIIGHVKNILPLDYDRIVGHMYSFEVY AHDAGSPRR  
SGTASVRVIVTNVNDPEPEIQIDNSTVYSVREDAEINYVVTFIQAVDLGDGRVS  
FFFTPQDQSTSYIFSIVPQSGLIRLQKVPDVMYVLNITVKDDGSCCGGGTTL  
SSEANIYVEIVDVNEHKPTFTNCSEYNKASLLENSPNTPIIKVHAVDEDRGEN  
GRVTYSILRSSTDTRKFNIDPNTGNITSLIQFDREKTHSHSITIKGNDQANPSL  
EGYCTFSINIGDVNDNSPVFDQPSYTVNIVQDYEVGRSVANVRAEDADLGINA  
EIEYSLISNPNDMFRIDIDDGIIYLDKDLGTDAYQLQVMAKDKGIPLNANVS  
VTVKVANITSKPPSWDRNDYDSTPYKVNETHVFPFGYMIAEFAASSNVDGNPRV  
LFNLINGDGNAVAVLDPFYLEIQGNKVQLKVNRLDYNVKPLHELRLRVTNY  
NFIPSTSEISPKIEVIDMNNKAPYFVGRNQDSSIYPGSVAENMPPGQTVIDVKA  
YDDDVFPPNELSFSLVYKEGVSQVLSISKIDDNTARITTTAQFDREQKNFYFI  
EVKAEDGKASDTPGHTPANTPNSAIATVQVRITDQNDNQPYFEKEMYNATV  
KEDASIRTSVILVTGKDPDTADSLVYSITGGNTRNAFGVQTKKGIYVARQLD  
YESGETEYTLTYMVSDGLYTNTTIVISVEDVNDNRPEFDQETYTIDDVVEED  
ESISPNQPRLLTKVIATDADKTRPNQITYSLLGSGTMPGDDQLFRVDPKTGNL  
YLLRKLDRDLPNGRATYQFNVRAMDEPQNPDTAQYGFASVEVKPKDINDNQ  
PIFTDNLRGSAEHSEKGEQVMTVIARDYDFRENGTVTYGIAEGPASLSSSIKF  
SIDNNGLITNTAPKELDREDVAVYNFKITAHDLGPNANTTTATITITLTDIND  
HKPEFLEKIYSVTMSEAQEQGEIALVRAKDKDIGENARLTYSLNSAHFAVNVI  
TNEGSITVYKPVYEDPSQRSFNLSVTVSDPDPSHTDTCYVEVTVEDFNDNAP  
QFDQASITVNVRENIAVGEKLATFSANDKDSGLNANFTFHIDTTTDRRRQFAI  
DEVSGEVSVRRGLDRETLPVHEVRILAIKGDQPQTGTASLTVNLIDINDNYPI  
FKYDYRPIVMENDPNFPKEVIRVHGKDLDEKFGPPFGFKSTRCEDGTSRCPC  
PGRPTCDDFNLTANDAGDGGNGEGVIFTKAEFDREKQKYYYIPIVMWDMRG  
KGDPNSTGTNTLTVEIGDINDNPHNPGHKDIFVYNYKGLFGNIPIGNAYAAD  
PDDWDVVDKTFDGPNTYKDLFEVISENGSILKEKVPEGEYTFTVKVTDNLHQ

KTVESTVTVVIQMLTEEAVKKSGAMRLTGITAEDFVDREKVDDGNLNSYYD  
SKSDKFRQLLADKLNTKKEKVEVISVMNNGEFTDVRYSVSGSPYYDASKSDS  
VISLNRKEFENKVGIKIGMVPIDECMDEKFEGGCYNYLNITEQPAMVNTNSTS  
FIGVETKVEALEGCRATMYPDEQECSADYCYNGGECVKDDWNTISCPKCPIG  
YDGPRCQGTHHSFDGKSYSLFKPLEQCLDSQTSIEFITQQADSLIFYNGPIGEL  
GPDDPTDYISLELVKGYPRLRIDHGTGELSLQIDGRDEQGSVKLQRLDDGKW  
HHIDIIREGRNVQLIVDRCQDISRNNGIGVDDRACRQSGATSNENRLLNVNTL  
LQLGGRAEDPPPSYPAGITPIRYNGCVKNFIHNGEMYNLHIGGTPGYPSGSNG  
CKKEEGICGKDLVPVCGENGICISSWSPDDYKCICKTGWRGEKCEKETT VKD  
LKDMSYIKWKLSDWENNITPWKLQMHLLQFRTRDENGVLMTVSTAENSKH  
VILEIENGILQVKYDLGNSNVQILQLYYPASNGRWHTVELERYGKQFILKMD  
GGGRNYNYTLGNPGEYEGINIQRIVFSGASVSETSSISVISPSTDLSDTCLNDV  
RIENGWFPMEMNENSESKAATLVRDVNLEDDCLRNDCEGVTCTGEFEVCYP  
LWGIYECRCQDGYKKGPNGKCILIPFCETDPCISGRCNVDKCECFEGWDGKF  
CEKRDPGSVVAGLSTGAIVAIVVCIFIALILALVVIFLVRFSEPNDSKYILEV  
DPDEDIRENVMNIDEEGAGEEDHDAYDISRLRKPDDNMSMGKSPLDPIPRTR  
MVGLGRAPRPGEDPDVGGFIDRLGDADDDPNGPPPDSVCEYAYEGGGSDA  
GSLSSLNTTSSDGDQDYDYLNDWGPKFAKLADMYGAGQED

>Tribolium\_castaneum\_E-cad\_tca\_TC013570\_001\_e\_4e-44

MDNNIDQQNHLAHSRLSQYQENHKPMFKDCQRYNPKVEEEQPSQTFVIRVQ  
AVDEDPPDREGGRITYTIEPPGTRPNFKINKRTGEITTALPDRDEPNRQKEYIY  
LTVRAVDDGRPELADICTIKVTVEDINDNSPSFDQHDYSSNVSEDLPENSEVL  
RVFAYDLDDRENARLTYSFVNGNDQFEDYFRIDSVTGVIYLLKKQLLGKQSKR  
FSSTVEVSDNGKEKNTARADVFTVVDVSNKRPPPTIEVVGGRVVIHLKEDEND  
FEKPLVALSAQSNIDDPSVVFELVKGKTTQTNKDQTFILSPSGPTSAQITMARP  
LDYETVEEYQLTVRAKNKDLLYASVTINVKVEDVNDEIPTFIELLRGSIVEND  
KIGAQAMTVRAIDKDGTSNNLVVYELLDYKDLFEIDKNSGVITAKASFDRE  
KEKLYHVTVQARDSAISALFPSKNKPNVANQTFQISIEDQNDNQPKFTKSLYQ  
VYNISENADTQKDVAEVKAIDADTASRIEYSIIEGNINDAFLIEPTTGRIKVNNK  
LDYEKVEEYNLTVQANDGIYTDATAKVFIIQISNENDEIPVFEPYNKDIQFEEERT  
SEDCIITLIAYPDPIKDRSADQKIVYRVGEAYKSFLSVGRNGCVTVTKPLDRDL  
PNGSSSYQAYIYADDYEGGPNSLSNYAEINIILRDINDNAPYLEQTEVWQEN  
QEPDGQTPIITLTANDNDGPENGPFTFEIPSYEMTEKFEIRDKQLFAKIRFDRE  
ERKYYDVPIKITDNGSPSQSGTSILKVIIGDVNDNAAQDGSSEIFVYKYEGIKM

DTEIGRVYVTD PDDWDL PDKVFEPDGYLDSNFEIGRIGGMITMKKEIVPNVY  
KLN FVVKEELMNGTLNTVHADVTVTVKEIPEEAVRKS GRSIRLKGITSEDFITK  
NPTTLTSRKDLLQKHLAEVFNTSIENVDFVTVMPSHNSTFVDVRFSAHGSPYY  
APERLNNKVTVEQEALERELGAEIIMISINECLQPDVCLNGSCSNILQIRDDPA  
VVFTNKTSFVGVKAVAEAVCECRKHM TKECFNNGGTPIEGICNCPEGFTGPNC  
ESLGISFAGDGWAMYPPFDSCNNTLISFSVLPQTDDGLIFYVGPLSKRQ AELN  
KDFMSVEMRGGFVVLK VDFGDDTEEFISDYKKINDGGSHKIKINYTNVEVQIE  
VDECPSDCIKWASFRKGGLLKTNGPLQIGGRSNIFTQEEAKMIWSNPPSSVGF  
RGCITNFTYNSYVYNLGAPSDKYHAHEGTCDYGMFQA AKFGIDSNFLVAILV  
CLAILLILLAVVVHKKRKHDFNEKDLDDTRENII NYEDEGGGECDTNFDLSV  
LRNNIDEKPPMTDHL YKHEVPADIGSFLDDKKRACDKDTLPCDDVRHYGYE  
GDGNSSGSLSSLASCTDEGDLKFNYLSSFGPRFRKLADMYGDDASEEGSQNG  
AEESWC

>Tribolium\_castaneum.1\_tca\_TC032877\_001\_e\_5e-09

MLISYRLQGLAIVMSDQFTSDRPSSDFRTPGLESGDVLDLPIDGADFRDDSVG  
HAMSRPANICPPSPLSIKITELRRYCTVSA TDPDCGVNAMVNYTLGEGFGK LK  
EFEVRSATGEVCITSSLDYETRNVYEFV VATTDRGGLSTTAMVKIQVTDVND  
NRPV FYPRVYNVSLREGGASSATTPVV VATTDPDSGRFGTVTYKIVAGND  
AGLFRIDKNSGEIFVNRPNLLSSRSQPYHRLNISATDGGNLKSLADAEVFISVID  
SAQRPPIFEHPRYTYSVKEDVRKETIVGNVKATVRDSGDRKNIRYSIYSGDPE  
GFFRIDPSTGAIRTASALDHEL RSSVLLNIQATNGDPPVYGH TQVNIEIQDVND  
NAPEFESNVVRISVPENVETGIALYAAHARDRDSGANGVVRYKIVNNGATGG  
LFNVDPKLGHLTLTRHLDYETTQRHSLIITATDTGIPPLSANLTVLVEVQDVN  
DNPPVFERNEYSKSVEESRPVNSQILQVTAVDLDTGNNARLTYRLLPGNNTG  
EVFGIFPNSGWLYLKGS LDRETKDRYELTVTATDNGTPSLSATAKVLVKVSD  
ANDNDPKFMKESYEF SIEENLRSGSPVGKLSATDEDIGINAVIRYSLIPGNTSFQ  
INPASGEITAKEPLDRERKETYDLVAEARDQGT PSRSSRVAVKIHVLDVNDNV  
PEIIDPQEDVVS VREEQPPGTEVVRVRAVDS DNGQNASITYSLLKRQDS DGYG  
VFKIDPLTG VIRTRMMLDHEEKTIYRLAVVASDAGKPPKQTVRVL RVEVLDL  
NDNRPTFTSSSLVFRVREDVKIGHVVGTVAA SESSDQENMISGSTGGHITYTL  
TSLMPENVIDAFDIDRSTGSLVVAKELDRERESEYRLEVRALDTSAMNNPQSS  
AITVRIDIADANDNSPRWPEDLVTISLGENTAIGSSIHNF TATDVDSGSGNDVR  
YHLLHQYPTNDTFTIDTLTGTLILSNSLDYETVQEYTHIISATDQSLNISERRSSSI  
TARVIITDSNDNPPKFVIPVPPTAFISESSSIGMKITHLVAVDS DSGDNGRVTYV

ISSGNEGSLFALGYDTGVLTAKPLPDAQRTYVLNVTATDHGTPTLHADMEL  
KLIVQGSEVNPPRFFNALYRADVPEDAPVGTFFVTRITAKSGLGEDGGNITFYIP  
QEIADGAFQIDPTSAVITTSKYLDRETKSTYTLPIYVIDSTTPGKTLFDVATITIE  
VTDVNDNAPEFKINSCYRLYPENNDIAVIHTVVAKDLDVGLNGEITYSINGG  
NVGNKFIIDNRTGALTAKPLDRESHSRYYLTITAQDRGKPSMMGSCNITVMV  
EDQNDNDPKFDLSKYSTTIPEDISIDTSIIKVHASDADMSVNARIISLANESQ  
WLFRIIDNKTGVITTAGLFDRELQSVYNFLVVATDSGKYNARSQRVPVTVRIE  
DINDNKPIFTQYPFREQVAAYKQPGQTILKITAKDADFGTNSEIVYSLVNDGS  
YPKFRINPNTGILTATQSLAAENGRVIHLNVIATDKGNPPQSSTGLVEIIVGDIP  
DGTPQLRFQNSTYIVNIAENTEQFKDIVRVSAVRTDGRRQRIHYSFGTGNEDNI  
FNIDTETGVIQVHDPKNLDYELHKEIRLVVEAKTEGGPVLHGYCEVVMQLTD  
INDNAPKFTQQQYSASVWEGNKKGAFVLQVVAFDDDEGHNSRIRYHFLDGN  
HDNAFKIEPEFSGILKTNIVLDREIRDNYKLTVIATDEGVPQMTGTARIVINVV  
DVNDNQPTFPPPATIKVSEATEVGTVLTTVAANDVDTNPTLTLYDFAKDNARE  
DLEFFSIDRFNVNDNAPVFSQLVYQANLPEGHSTELSEILTVNTTDSDSGDNA  
RVEYFLLNPIPSFAIGRTDGILRANLSNISTTQDVQLYVQATDLGKPKLKS VVS  
VRIKTNNRSGHVSSSNKKDYKIQIPSTPKGTIVLHLGKPPNVQKQASFYIVDG  
NEEGAFEVSSPTGALIVVKTLREHRDSYSLKITIGDSAVIAVSIIIVDTNDNAP  
VFKQSDYETTISEGTPVGTSIKKFEATDGDSAGPNSDITYDITSGNDELLFRLD  
VISGVLFVNGTLDYDDGVTEYNLVVRACDRAAIPLCTLNTFSIELQDENDNEP  
KFPVSEYLEFVGENESIGTSVFTAHAATDLKGAFGSLNYSIVSASSVNYPGTD  
DSWRLFNIDSSTGMVTTNVIFDYEQQSRYVFIVRATDVGGKSSNVKVRVEIES  
KDEFHPQFTERTYKFLVATS VVLPVGYVVGHVIAATDRDKGPDGRVVYQLTT  
QHSYFKINRTTGAVMIKKKFDNEGLES GREISLVVTASSGRQGS LTNMTVVEI  
TLDPLADPGTNLAINRENNTTVAAANGGIADWALGLLIALILLITFGAVFVFL  
HMRNKRKINKPNLNSESVSTSNNYVDPSAFDTIPIRGGGGVVTSGTNQFAP  
PKYDEIPPYGP GHAASSNSGAATTSELGSEQSGSSGRGSAEDGEDGEDEEIR  
MINEGPLQRDSGIHRQNDDDDNLSVSVRNTQEYLARLGIVNSSGVQQGTSR  
LCSDPRAGSSKESIHHHQGVPLDSLHIFDEEGNNENDMTLIYAKLNDVAGSDR  
ASSTDEGGGVNTSTLEHVMAMGGYGEVPAVTHQPSMNGSLSSIVHSEEELAG  
SYNWDYLLDWGPQYQPLAHVFSEIARLKDDTASVKSGASGNSSVKS KSSAPA  
KSIPPLITSVAPRSIAMPVLNSRGGSSHAGGHSQMMMLPRSPINHDASGATF  
STSTAMSPSFSPSLPLATKSPSISPLVTPGLPTSHHVMGRQPPQTRTKTVVDA  
ELRI

>Tribolium\_castaneum\_N-cad\_tca\_TC033193\_001\_e\_9.4e-54  
MLLSTAGLLYTDNQRVIIHVRDVNDEPPYFINRPLPMQAVVQLNAPPNTPVFT  
LQARDPDTDHNIHYFIVRDRTGGRFEVDERSGVVTRRGTDVDFQLDMEYVLY  
VKAEDQNGRVDERRFQSTPEERLSIVGGKRAPQFYMPSEAEIPENQKKDSDI  
ISVKAKSFADREIRYTLKAQGGAGTFNIGPTSGIVKLAKELDFEDLRQPHVY  
SLVVTATEDSGGFSTVELTIRVTDVNDNAPKFELPDYQAHNVDEDIPPGTSIL  
KVKAMDADSGANAEIEYLVSDDHFSVDPSGIISNNKQLDADNNNAYYEFVVT  
AKDKGEPAKTGTATVRVYTKNKNDEEPPKFSQQVYTPNVNENAGPNTLVTTV  
VASDKDGDNVRFVGGTSSGQFVIEEITGVIRLHKSISLDRDKYELNVTA  
MDDGACCVNGDQTIHTSTAVVVFITDVNDNKPIFKDCGTYYPKVEEGAPN  
GSPVIKVHATDEDKGVNGQVKYSIVQQPNQKGTKFTVDEETGEVSTNKVFDR  
EGDDGKFFSVTVKATDQGEPSLEGVCSFTVEITDVNDNPPVDFDRQKYVENVK  
QDASIGTNILRVSASDEDADNNGAIVYSLNAGSNAADLEYFEIQPESGWIVLK  
KALDRDRYRLRVRASDRGEPSPFADVVELDVVDRNNKPPLWDVNTYGPIHI  
RENVTVGTVVTSVKARLVSALAGAPGALGPGVGGRRQGAWRGPAASGRETY  
KLEATAQDKGYPLSRSEVQIDVVDRAANNPPVWDHVIYGPIFIRENLPVGAK  
VVSVKASSGIENNPTVFYRLMPGSTAQTNKYHTFYLQQRPDNGFTWADIKVN  
HPLDYETIKEYNLTRVENNGAQQQLASEATVYIQLEDVNDEIPLFTEREQETVL  
EGEPIGTKVTQVNAIDKDGTFPNNQVYYYIVDSRNEGKDFFEINKETGEVFT  
KIVFDREKQGAYALEVEARDGAPSARPNSDSQPNSVTKFIRIGIADKNDNPPY  
FDKALYEAEDENEDIQHTVLTVTAKDHDESSRIRYEITSGNIGGAFVKNMT  
GAIYVAGALDYETRKRYELRLAASDNLKENYTTVVIHVKDVNDNPPVFERPT  
YRTQITEEDDRNLPKSVLRVTATDGDKDRPQNIVYFLTGGQIDPDNPANSKFD  
INRTTGEIFVLKPLDRDQPNRQWRFTVFAQDEGGGLVGYADVQVNLKDI  
NDNPPTFPQGIYLGNTENGTAGMVVMTMTAVDYDDPSEGNTARLVYSIEK  
NVIEETGSPIFEIESETGVIKTAVCCLDRERTPDYSIQVVAMDGGGLKGTGTA  
SIRVKDINDMPPQFTKDEWFTEVDETDTLPEMPILTVTVHDEDETnkFQYK  
VLENSGYGADKFTMVRNNDGTGSLKIVQPLDYEDLLQSNGFRFRIQVNDKGE  
DNDNDKYHVANSWVVVKLDRDINDNKQFERPNIEVSVYENAEVGSLETfk  
ATDPDQGGKSKVSYAIDRISDRKRQFSINQDGTVSIQRSLDREDTPRHQVKILA  
IDDGIPPKTATATLTVIVQDINDNAPTFLRDYRPVLPVPPRKVVEILATDDD  
DRSKSNGPPFQFRLDPGADDIIRASFKEQDQK GANGDGMAIVSSLRSFDREQ  
QKEYLPIVIKDHGNPAMSGTSTLTVVIGDVNDNKMQPGSKEIFVYNYQGQAP  
ETEIGRVYVYDLDDWDLDPKKFYWETVEHRNFKLNEDTGMISMKHGTREGK

YHLRFKVVYDRKHTQTDVPANVTVTVKEIPHEAVVNSGSVRIAGITDEDFIRIW  
DYKTQSLSRKADKFKDKIAELLNTDRENVDFSVQLRRKHPPLTDVRFSAH  
GSPYYKPVRLNGIVLMHREIIEKEVGINITMVGIDECLYENQMCEGSCTNTLDI  
SALPYMVNANKTALVGVVRVDVLAECTCGARNFSKEENCRNTPCYNGGRCIE  
TRYLSLSCSPATYNGPRCQQTSRSFKGKGWAWYPPLEMCDKSHLHFEFATRK  
ADGLILYNGPIVKPETDEVMVSDYIAVELERGYPRLLLDGSGTLELRVKTKK  
SLDDGEWHRIDIFWDTENVRMVVDYCKSAEIAELEDGTPPEFDDSSCQAQGTI  
PPFNEYLVNAPLQLGGFYVEEFDPTTEYHWQYMPVVGKPFDCIRNLFHNSKL  
YDLAHPGLSRNSVAGCPQTEEVCGRSDATHRCWEHGTCVGSFNEAKCQCKP  
GWTGPACLHPTIPTSFKPQSYVKYALSFEPDRFSTQIQLRFRTREEHGELFRVS  
DQHNREYGILEIKDSRLYFRYNLNSLRTEEKDIWLSSVTVDDGQWHVARVSR  
YGSAATLELDGGEGRRYNETFDFVGHQWLLVDKQEGVYAGGKAEYTGVRT  
FEVYADYQKGCLDDIRLEGKHLPLPPAMNGTQWGQATMARNLERNCPNKP  
CANVICPEPFECVDLWNDYECTCGEGRVMSADSKDCMDKDECVDLPCLNGG  
TCVNLEPRFRYRCHCPDGFWGENCELIQEGQTLKLSMGALAAILVCLLMILSY  
KFHENGCVNENECLWLPCINGGLCKDYEPKRYECSCPSGYTGGHCELELAP  
SGAIMPSKDFIVAVIVCLLALLVLLVLFVVYNRRREAHIKYGPDDDDVRENIIN  
YDDEGGGEDDMTAFDITPLQIPIGGPLPELAPPKIGFSVIGVQGEPNVGVFIEEH  
KKRADSDPNAPPFDDLRLNYAYEGGGSTAGSLSSLASGTDDEVQEYDYLGAW  
GPRFDKLADMYGPGEETEQEEEE

>Acropora\_digitifera.2\_adi\_adi\_EST\_assem\_551\_e\_4.7e-13

PTFPQAVYHWTLFEGSPVQRTLQAKDGDGFANATVGYSILSGNVGNMFMLR  
EFRDRKGHLSAELDLAAGKELDRETRDSYLLNISATDGGNPAQVGSTLLNITV  
GDINDHKPVFSNSSYSVNTLENSPRGTTILQVFATDKDIGSNAVIEYHVEHGSH  
SDPLFAFSADPKTGVIINNHILDFEDQRVYNIYVRAENPNNGMFTLARVAIHV  
VDQNDNKPTISVLFELSGRYQVFENAPIGTVVARIYVSDKDSGKNGEVDVTLE  
GGNGYFSARSDPANNVDIIAVAKNLDRETQERFILRIVAKDRGQPQOTSYSDF  
IANVGDINDNYPVFDQAVYGAVLSENVTIGTQVVRAEATDRDLATNAQLVY  
NISHSLPTDYKTFWFQINSQTGQIKTAALLDREKIEQVVLNLTVSDLGVPPLSA  
NCIVLINITDANDNNPSFSRAVYFATIAENKPIGTSVEQVSATDIDIGQNGEVR  
YSLDNQQGNVPFDVDSSTGIVSTAGLIDHELRSYNLKIVATDGGGREAKCD  
VNVTVKDVNDNFPVIDPLAYDVKVYENLTIGDAITTIKDDDSGLFSRLTFSI  
SSGNADSIFHVNPSGLVTLKALDREEDDFHQFNVSAEDGGGLKSKNTALV  
QVTVLVDNDEPPIFDASSYNFTIVENSPVNSILGSVFASSKDLGTNADIFYSVK



SGDADNIFAINSSGTIFTQRNIDHEKAALLVLSIQAKDGGSPPLYGFANVTVTV  
IDLNDNSPSFLSNDIAINILEDTKVGEVFYNVASDRDSGLFGQVQYTLLSNPN  
NTFQLDQYTGALS LTVPIDFEGPRHYTIQVLAQDGGSPPLNDTASFKFTVIDV  
NDHAPKFSNSTYSVHVMEGSVTGNILNVVATDADSGDNARISYSFQPGVDRT  
VFGLKPDGWIFIKHTLDRERQAVYRFGVTASDQGNPPKSSKANVVVHVDDA  
NDNDPKFSQNQFFFPVAENKSNRTKVGQVSATSDAGLNAKIVYSLVSQSPQ  
FVIDPDTGIIRTNQVLDREVQASYDLMVEARDQGASPRTDKSKVTVVVKDVN  
DNSPTFRNRSYSQAVPEDIPLGSFVIRVVADDPDFGKNGEISYNLTSGHIVDKT  
AMFRIDRRTGEITTAQRLDREQIHRYILFVVAEDHGTTPPKDHVVIVSVEVLD  
NDNPPRFVNNSSFFVNVAEKLPVGTVVTTVTAKDIDAGKNGQVRYTIDQGNA  
GGSGINDTSGVITLLKQLDYENKKKYQLRVEARDLGQNSRRSYLFVTVYVL  
DSNDNTPIFDKNPVTVALREGVPNYFNVTTIKAHDYDSGQNSRIWYSVDSQSP  
GPPKFKVNRETGVVQTVGPIDRESVDEYTLTIRATDQAFTESERLSSTLTVLIIV  
LDINDNKPDFVSPERTFVLEDEPFGYPIITITSIDRDQGSNAEVRY SIVRGNSGIF  
SLDPNSGLLKLHGTLDYERKPTYTLKISATDLGTPPQTSFQTLTIDLVDVNDN  
APQFNQSLFLGNVYENEPVGTVMNVTAHDPDSGSGNGALSYNIPRGEVMPRF  
VIDPKSGLISTNSTLDREEKD VYILTVSASDNAFPFRVATCTVKITVLDKNDHS  
PVFNPTRLNLTVMENRAPFMFYVMSAQDPDVGRNGRLRYSLRSGNEDNKFTI  
SEFTGELSTTAELDREKTPQYDLHVVASDITPPFYNSSAHVSVFVGDANDNRP  
SFLRASVDNIRELTPINTAIFNVSAVDRDVGLNGEVVYSLSNKTFGIFRVDSR  
TGVIYTQRQFDFSVKQAYTFNCYATDRGVVPRRGSTEIRVSIIDENNHAPVFQ  
RLPYSQQIQPSFPQGMRVLTVSATDQDSPSITQMSYRLIGNSSYFLLTSSGELQ  
VKRGVYSIPNGTYVLNILADDGGGLSGRGVAEITVGPIMDNPPVFLNSTPANV  
SIPENSPNDHEVARVIATRSGSSSGIVYSIINGNDGSPFKINRQSGVVTVANTAL  
LDFERLRYFRIQVIASLESISSPNAYLTLNVYLLDVNDNRPLFNPADISVQLAE  
DDALHSSGFNARTVVMVTATDLDSGSNQQITYELDSGNVNQRFAIDSKTGVI  
TTTKLIDREVL PYYRLVVKATDHGNPPLSSTSDVSVNIVDVNDNIPSFSGPYTA  
EVVEDVKVGYVVKRVAASDRDASP NLVYSFSNGMSNKDLFHIDRSAGVVS  
SDSLDYESTKSFVLNINVTDGTYQSQTTLTVNVKDVNDNAPRFLNSSYRATLS  
EDSAAGAFILRVSAVDKDSGTNGEITYAFVTDVPQFTIHADTGSIIHTAQKIEVG  
AQESLFFVVVSATDRGVPRQRAYVNVKIQISRTPKFTSPSYAASIPENTAPGTE  
VVTVGASVIDGTKIGFFITNDQDSIFRIGRRTGIIENVQPRLNIEKDKNYLLLVE  
ARDDVTKRSVVVGVNITITDVNDNPPKFSRKQYTTNVREDV SIGTMILQVTAS  
DDDSGMNGQVVYSIDSGNDKNSFMINGTTGEIVTVKTLDYENMKRHLLSVQ

ATDQGSNSLKGFAVAIDVTDLNDNIPLFHIMNPLSIAVEENSEVGTQFYQVL  
AVDTDGINRELYSITGGSGENLFIIDHKSGYLRTNATFDYETKSFYFLLIKA  
VDSGSPPLSNEINITVYIKSVDEYEP AFLNSTYKFEVPGNAKIGDFVGQVSAVD  
KDGGEDGVVRYSFESSNAKVFGINATSGVIFVNKSLGEVESKRKRRSIEREQ  
GVGSRVRRTDLEIVSLKIRAHSGKSGSKFSTVNAEVAVDFACPGCIPGRVD  
TQSGNALSPIIVLVITVSGIIFIVIVVVIAAIAIYKRNRKRGRPSSRSFGDGSFDP  
ISVYPSLNGNVNHVESLDNVSTPRSASQERSPLNVPSDSPTRRTNSTDSPNSA  
SSGRGSSDGVDFEVDHPATLAKGDLGSLHSENYVRTLIAPDSGIHQSDQASQ  
LTISDTSSVLQGEGLGVDKRQDKIDKILARLGSQESLHVFGEEGGGEADGGVE  
VGNLLYARLSEVDADEDESIIDGIRPFVDEGHDPHYGGSLSSIVGSREELTGS  
YNWDYLLDWGPQFQPLADVFLAIGKMKDDSPPKAMSLSLQSSRDLRNLPA  
GVVTTDMLSSISSLPRSPISPPSTRYTSPAFAFPNFTPAITPLVTRSPSVSPLDTGTS  
TPAFTPASATPKSGSRPASMHLVQLRRESHDGSNSDLTHSPSISDNESNLEVDV  
>Acropora\_digitifera.1\_adi\_adi\_EST\_assem\_2804\_e\_2e-27

MRIKEIVGFLLCFLLHRINTAVQFKQEILEEGKSAGYVVLSPPLPPSNEIYTF  
FQAQDSGSRDALLLFQISESGVIKTTKPITYEIGQKNYYDLVAIRRQRGEKVG  
IPTSIRIVIKDTNNSPTFPQHLYYGRVKERSPDNTVVMGLENCFAEDRDTGGI  
QSYSISSGNDKGYFKTSMTTVNDRKFLVLKTTNPILIDTTPPEINLTVRAYDGA  
NSATTGITVKIIDENDNSPVFEKKSYPATTVNEDTPLLTSVLRVRATDKDLGTN  
GGVYYLNGAQYFSVDAITGVIKVVRQLPDQPRIVLDVKATDRGTPSKTASV  
QVTIDINGIPDYPPPDSLNPVNTVPVFQEEASYTASVREDFPINAALLVIHAIDR  
DPPGRNRQIRYSLSSPGTFEIDQFSGVIKLVGRLNYDSKKEYNLFVRATDQAV  
TPLVASVGLKVTVQEVDKNRNTPVFSPANQQQRVVSIRENMPASTQVGLIT  
ATDADGNQGPDGQIAYSIFSGSLPYFQINKDSGRLETVIPLDRERQSQYDLIV  
EARDKALYPLFSHVYLMINIDPEEDNPNPDFSKVVYTANVPEKAPRDTFVTVIH  
ATDRDGASVSYSIQNAGSAFAIRAETGVIVTARVLDASIGDFTLFIASAGT  
KKSESQINVTIVSKQDSPPTFKNAPYSVTVPENLGKIDNLLCIAAYGVQGTAVS  
YSIASAAVGKFAVDIDSGRFSATSSFDYEQVLGGEYPVQVQASTSPQQVATA  
GITVRVTDDKDPPTFSRSSYTFDIDENTPGGTILPKNADGSSGGLLISDEDTAI  
TQFDCTIENVPGNVDFHFRVVPDNSVRECKLVTVRGFNFVENPSFQFEVRAT  
DRNYRNMFAAQAQVVKVVIKDRNDHSPEFSQTSYWASVGRDYPTGNSILKVTA  
TDQDSGSFGEITYELLNSQDRSRFSLDSNTGVLSFPNSLPARRYQLRVQASDR  
AQKSNEIRRTEVDVFTVYLPGTGIIVFDPPPLPKAIRETINTQVKLVSTRGA  
SNIKYSIVGGNTNNAFRIGSNNGQILVQKALDRETQSKYTLVIRAEESTSNVAT

EANFIISVTDVNDNPPMITFMEVQPKNIAIEDFSPPGSPVIRVIATDRDTGAAAA  
IKYSISIGTPFSINEDNGLITAAREIRKTERSTWDLTVTARDSGTPSQSSAPYRLR  
IHVTDGLQAPQLQPRFSVNVNENEQVGNVVKDISPVQKNPNFKYSILSGNRD  
DAFCINHAGMISVAKPLDRERVNSYILRVASVGNKISNSTVSVTIADQNDDA  
PQFTRTVYTFEVREDLPQGREVGRVLAIDRDDGTNGQVSYSLLYTVDVNSKF  
TVDGATGAVVTGSLDFEIRQHILYVKAEDKGRPLRTSIKVVIVNVKD VND  
RSPKFSADSYVTKVSLDEVIGTQVLLVSATDLDSGDNSVVVYNITAGNEEGAF  
EIDPDTGAIKVKKSLTTVSASKFSLRVEAKDKGNPPKMTLTTVQLNVFLPDGP  
PKFVVKPVVEERFEGIAANGRVMVKAATSEALTYEIIISGNEDGLFRIEPTTGE  
IKVTRVLDYEEASEHRLVVRVMDTRDRSDRVTVILKVKKNINDNEPQFPGESN  
GFVERKVEDDFQIGDAAARLSAYDKDAGDSISYQLSANALSLFSIDNEGFLIA  
KKPRSEIQSPVKFELVAKDNGVPQRQTTVQVRLVFVSYRGDQQPVRVYVRED  
KEVGSVIARVPRFFPGGTLIIFFPQKANFTVDNSGRIRMTTAFDFEQSQFYRLT  
VREQEPAPGRRNTDIDVEINVVDVNDNKPKFTMIDFFGRVNTNSRPGTSAYQ  
LKAEDKDGGLSGTVGYQMLSQGVVPGFINPISSVETDATLQDRGGYNITVFPF  
DFGVPREFGAAVSLDIKTVNFKPQFSESAYTFQVFENAPPGVIVGEVNATSLS  
GARLGFSVSLGDPSKKFEVHNSGEIRLNSRLDHEKQSIYNLKVKATELIPGGY  
SNEVEVQVTVTNANEYYPRFIPNVYDKTVDENVAAGEIVLRVTANDNDCGIT  
GKCEAGLLKFSVEGTSLFKIDPRTGDVSVGSTPLDYEKQREHVFTIVVEDFGE  
KIYKSRGFVTIFVRNTDDEKPFLESDYTISIAEDAETGRPLAAILARDADGDP  
VKYSITSGDSGGIFQINPTTGVLSLKSSIKGNPRTQYTLQVKASNSAQDSRFDE  
VRVVVNIEDSNDNRPVFTDCPPEVSVEENKPKGHRVYTVIAQDTKDRGRNKE  
IEYFLVTGGERLFEIDNTTGVIKTLTSLDRETQHTLIIMAEDGGHGRNSAER  
LLSYCILDVKVVDQNDNFPFFLTRTYASVWQRASVNTEVLTVRAADMTR  
VNANIDNSEVQYQLVNADDFQVELATGVIKTKTTLVSYVGKVQLQIRAINK  
QPMASEERPRTSTTTVEINVEKDKPPAFTSSAVYKSAIREDVRIGKEVQRIVA  
TSQVDSKNKIVYSFVKSNDPEGEQKFQIDPSSGNITASTLDYEQVKEYRLQFR  
ATDIATNLYATCVVIISLIDVNDTPTFKLEEYTA RVPENAAVDFNVITIEADD  
RDTGLSGQVGYTLEDSSDGQFFAINGQTGVIITKKSFDREDPKHIPKYNVFAE  
AKDKGVPPLAAKVTISVAIVDQNDQPPIFANPRYEVSVDQEDAGIGTSVGEFTA  
TDADIGDNARLDYFISSGDASHIFKMESVYGDKNFGILILAGKLD FETKKTNYNI  
SVTATDRKDSATVPVVVNVLDTNDNIPQFRNLIYEATIPENSPPGQRVAKVSA  
TDLDSPKIQNDLRYSLDADGQRNFAVDAVSGQITTANQRLDREVNPPVVTFTA  
FAFDGKHRGQALIRVTLQDVNDNSPYFPNPPYVGYVEENLDPGASVMVIQAF

DLDFGSNGEIVYSLDDSSNNKFKIDSNSGLVTTVETMEKETAVNSFTIVVKAT  
DKGSPPLSGTVTATIRVSDGNDQAPVFNPREYRQKVPEDSPPGFLVTQVKATD  
QDEGYNAELETTITAGNDPYQFYIDPKTGEILVSGMLDFDHGKKFYNLTMV  
RDRGVVRPKQAPEPALVYITIVDSNDNPPVFPVPAEYSIKVTEGTPGDTVQLVT  
AVDQDTGTNALFTFGIADGDDADMFGIRPDPKNSSIGFIYTVLQLDRETVPQY  
NLTVTATDTGGLQGVALVRITVLDTNDNGPWFQPRYYEGSITVTSDESSSQEI  
TTVKVFDPEPSNGPPFSFSIESTKPATDATRFGLRDKPKPQTANEVYSIGAF  
TRQVPEWELTIKAVDSGKPVAMSNSTLVFVYVDDKNLNEPFDGALTIIVNA  
YDDKFAGGIIGKAYYQDVDMGIDENTYSMSKQYFTLGEITGDISAAANIPV  
GLYKFEIEVLEQRLRPNTNTFKTVTSSVSVIVQSVPRAILQSVAVQILAFRRP  
ALFVADIYTNFRQKLAGIFGVQEADILFSVQRAPSKRVPLADVFGVEIQLAVR  
SSGSSFMDKMDVVRGIVEGKAELEALSLKIGDIGIDVCAAEQQDVGVCNNKV  
EASSAFTVVSGDIGQIEPSKSSLTVVSIIDITLKA VYTSILLPDINCTTGTPLHGG  
TCHNAVPGIICECGRDYLGPCEQSTTRTRFRGNSYLWLDKCLASYERSISLQF  
MTGSANGLLLYQGPLYNGANNGLPDSIALYLVDGFAKLVIAGLPHMTPLEL  
YMNKGDRLDDRTWHTVQVIREKRVVLRIDKCSYSKIVEDYQKIVEDRSSCE  
IKGEIWGSAIYLNGLGPLQIGGVENSISDMKINFTGFSGCIRNIYNNGRMYDLF  
NPLKEVNTELGCRLNNQCPNCGRGYCEPFWNYAICVCDLGFGGANCDRT  
QANWYRANSFTQYRVKQVQRKRRELVPAPVSMANEFYTNIALQVRVSPNSS  
NVVIFLASNSLGTEFNRIDVKNHVLRYVFRLGDRMKILKIPQLNVTDDKYHTV  
IVKREGNRASLQIDYRGKVEGTTGGLHKLLNMGGGSFFTGGLPNITEVRVVE  
AFVNSGGNAVLRTAEGNISSGMGSAYTGIGSYMSNVITVNNFGGVDVSYGV  
SGAPHVQRTIKTKSSIFTGSSGVITRISVSRGHSVEFMNSRFFTRKTKQKQKVII  
SSSGGSVSGGSGGASGGSGGASGGSGGSVGVSGGGGASVGGSSILGSSASMDTK  
GNLRSYSGSGFGTWTIAGAGPNEAGDVQVIGDFGGCTASNSYNGLDLSDPTI  
EARRQNVEFPCPCGSNFCRHGGTCVSADPPYCLCPVGWSPVCEIVKDP RP  
GQRPSSRWANPAVIACILVILLAILVIIGAVLLKRRPQPTVVAVVEDGHVHDN  
VRPYHDEGAGEEDNFGYDISTLMKYTYVENG VAGTGGVGHGKFKNGGSSGE  
EEFTATETKPLLQGAMPDADLHFKTTTITKRKVHPDSIDVKQFIDTRVSEAD  
GEYILSIDELHIYRYEGDDSDVDDLSELGDSDEEPDEEEEQEFAFLQDWGKKF  
DNLNRIFNEDE

>Acropora\_millepora.1\_ami\_gi|379113423|gb|JT011093.1|\_e\_9.1e-27

MARGINAVGFLLCFLLHRINTAVQFKQEILEEGKSAGYVVLVSLPLPPSNEIYTF  
FQAQDSGSRDALLLFQISESGVIKTTKPITYEIGQKNYYDLVAIRRQRGEKVG

IPTSIRIVIKDTNNFSPTFPQHLYYGRVKERSPDNTVVMGLENCF AEDRDTGGI  
QSYSISSGNDKGYFKTSMTTVNDRKFLVLKTTNVPILIDTTPEINLTVRAYDGA  
NSATTGITVKIIDENDNSPVFEKKSYPATTVNEDTPLLTSVLRVRATDKDLGTN  
GGVYYLNGAQYFSVDAITGVIKVVRQLPDQPRIVLDVKATDRGTPSKTASV  
QVTIDINGIPDYPPPDSSNPGVNTVPVFQEESYASVREDFPINAALLVIHAIDR  
DPPGRNRQIRYSLSSSGTFEIDQFSGVVKLVGRLNYDSKKQYNLFVRATDQAL  
TPLVASASLKVTVQEVDKNRNTPVFS PANPQQRMVSIKENMPASTQVGLIT  
ATDADGNQGPDGQIAYSIFSGSGLPYFQINKDTGRLETVIRLDRERQSQYDLIV  
EARDKALYPLFSHVYLMINIDPEEDNNDPFSKVVYTANVPEKAPRDTFVTVIH  
ATDRDGASVSYSIQNAGSAFAIRAETGVIVTARVLDASIGDFTLFTASAG  
TKKSESQINVTIVSKQDSPPTFKNAPYSVTVPENLGKIDNLLCIAAYGVRGTAV  
SYSIASAAVGKFAVDIDSGRFSATSSFDYEQVLGGEYPVQVQASTSPQQVATA  
GITVRVTDDKDPPTFSRSSYTFDIDENTPGGTTILPKNADGSSGGLLISDEDTAI  
TQFDCTIENVPGNVFDHFRVVNPDNSVRECKLVTVRGFNFVENPSFQFEVRAT  
DRNYRNMFAASAQVKVVIKDTNNHSPEFSQTSYWASVGRDYPTGNSILKVTAT  
DQDSGSFGEITYELLNTQDRSRFSLDSNTGVLSFPNSLPARRYQLRVQASDRA  
QKSNEIRRTEVDVFVTVYLPGTGIIVFDPLFPKAIREDITINTQVKLVSTRGAS  
NIKYSIVGGNTNNAFRIGSNNGQILVQKALDRETQSKYTLVIRAEESTSNVATE  
ANFIISVTDVNDNPPRITFMEAQPKNIAIEDFSPPGSPVIRVIATDPDTGAAAAIK  
YSITIGTPFSINEDNGLITAAREIRKTERSTWDLTVTARDSGTPSRNSAPYRLRI  
HVTDGLQAPQLQPRFSVNVNENEQVGNVVKDISPVQKNPNFKYSILSGNRDD  
AFCINHAGMISVAKPLDREKVNSYILRVSASVGNKISNSTVSVTIADQNDDAP  
QFSRTVYTFEVREDLPQGREVGRVFAIDRDDGTNGQVSYSLLYTVDVNSKFT  
VDGATGAVVTGSVLDFFEEIRQHILYVKAEDKGRPLRTSIKVVIVNVKDVNDR  
SPKFSADSYVTKVSLDEVIGTQVLLVSATDLDSGDNSVVVYNITAGNEEGAFE  
IDPDTGAIKVKKSLTTVSASKFSLRVEAKDKGNPPRMTPTTVQLNIFLPDGPPK  
FVVKPVVEERFEGIAANGRVMVKAATSEALTYEIIISGNEDGLFRIEPTTGEIK  
VTRVLDYEEASEHRLVVRVMDTRDRSDRVTVILKVKNINDNEPQFPGESNGF  
VERKVEDDFQIGDAAARLSAYDKDAGDSISYQLSANALPLFSIDNEGFLIAKK  
PRSEIQSPVKFELVAKDNGVPQRQTTVQVRLVFVSYRGDQQPVRVYVREDKE  
VGSVIARVPRFFPGGTLIIFFPQKANFTVDNSGRIRMTTAFDFEQSQFYRLTVR  
EQEPAPGRRNTDIDVEINVVDVNDNPKFTMIDFFGRVNTNSRPGTSAYQLK  
AEDKDGGLSGTVGYQMLSRDVPFGINPISGVVETDATALQDRGGYNITVFPDFD  
GVPREFGAAVSLDIKTVNFKPQFSESAYRFQVFENAPPGVIVGEVNATSLSGA

RLGFSVPLGDPSKKFEVHNSGEIRLNSRLDHEKQSIYNLKVRA TELIPGGYSNE  
VEVQVTVTNANEYYPKFEPNLYFKVVENVAAGQSVLRVTAIDKDCGTTSK  
CEAGLLKFSVEGTSLFKIDPRTGDVSVGSTPLDYEKQREHVFTVVVEDFGKI  
YKSRGFVTIDVRNTDDEKPFLESDYTISIAEDAETGRPLAAILARDADGDPV  
KYSITSGDSGGIFQINPTTGVL SLKSSIKGNPRTQYTLQVKASNSAQDSRFDEV  
RVVVNIEDSNDNRPVFTDCPPEVPVEENKPRGHRVYQVVAQDTKDRGRNKEI  
EYFLVTGGERLFEIDNTTGVIKTLTSLDRETKDQHTLIIMAEDGGHGRNSAER  
LLSYCILDVKVVDQNDNFPFFLTRTYYASVWQGAPVNTVLT VRAADMDTR  
VNANIDNSEVQYQLVNADDFKQVELATGVIKTKATLVSVFGKVQLQIRAINK  
QPMASEERPRTSTTTVEINVEKDKPPAFAPSAVYKSAINEDVKIGKEVQQILAI  
SQVDRKNKIVYSFVKS NPEGEQKFQIDPATGNITTASTLDYEQVKEYRLQFRA  
TDIATNLYATCVVIISLIDVNDTPTFKLEEY TARVPENAAVDNFVITIEADDR  
DTALSGQVGYTLEVSDSSEGQFFAINGQTGVMITKKSFDREDPKHIPKYNVFA  
VATDKGVPPPLAAKVTISVAIVDQNDQPPIFPKPSYEVSVQEDAGIGTSVGEFTA  
TDADIGDNARLDYFISSGDASHIFKMESVYGDNNFGILILAGKLD FETKKT YNI  
SITATDRKDSATVPVVVNVLDTNDNIPKFDNLIYEAIIPENSPPGQRVETVSAT  
DLDSPKIQNDLRYSLDADGQKNFAVDAV SGLITTANQRLDREVN PVVTF TAF  
AFDGKHRGEALIRVTLRDVNDNSPYFPNPPYVGYVEENLDPGASVMVIQAFD  
LDSGIDGEIVYSLDDSSNNKFKIDRISGLVTTVETMEKETAVNSFTIVVKATDK  
GSPALSGTVTATIRVSDGNDQAPVFNPREYRQKVPEDSPPGFLVTQVKATDQ  
DEGYNAELEFTITAGNDPYQFYIDPKTGEILVSGMLDFDHGKKSYNLTMVVS  
DRGVPPKQAAKPAFVYITIVDSNDNPPVFVPAEYSIKVTEGTKPGDTVQLVTA  
VDQDTGTNALFTFGIADGDDADMFGIRPDPKNSSIGFIYTVLQLDRETVPQYN  
LTVTATDTGGLQGVAVVRITVLDTNDNGPWFQPRYYEGSITVTSDSNSQQEIT  
TVKVFDPEPSNGPPFSFSIESTKPATDATRFGLR KDPKEPQTANEVYSIGAFT  
RQVPEWELTIKAIDSGKPVAMFNSTLVFVWVDDKNLNEPFDGALTIIVNAY  
DDKFAGGIIGKAYYQDVDMGDENTYSMSEQEYFTLGELTGDISAAANIPVG  
LYKFEIEVLEQRLRPNTNTFKTVTSSVSVIVQSVPR AAILQSVAVQILAYRRPA  
LFVADIYTNFRQKLAGIFGVQEADILIFSVQRAPSKRVPLADVFGVEIQLAVRS  
SGSSFMKMDVVRGIVEGKAELEALS LKIGDIGIDVCAAERQDVGVCNNKVE  
ASSAFTVVSGDIGQIEPSKSSLTVV SIDITLKAVYTSILPPDINCTTGT PCLHGGT  
CHNAVPKGIICEGRDYL GPECQSTTRTFRGNSYLWLDK LASYERS SISLQFM  
TGSANGLLLYQGPLYNGANNGLPDSIALYLVDGFAKL VIALGPHPMTPLELY  
MNKGDRLDDRTWHTVQVIRERKKVVLRIDKCSYSKIVEDY GQIVEDRSSCEI



KGEIWGSAIYLNFGPLQIGGVENSISDMKINFTGFSGCIRNIYNNGRMYDLFN  
PLKEVNTELGCRLLNQCPCNCGRGYCEPFWNYAICVCDLGFGGANCDSTRQ  
ANWYRANSFTQYRVKQVKRKRRELVPAPVSMANEFYTNIALQVRVSPNSSN  
VVIFLASNSLGTEFNRIDVKNHVLRYAFRLGDRMKILKIPQLNVTDDKYHTVI  
VKREGNRASLQIDYRGKVEGTTGGLHKLLNMGGSFFTGGLPNITEVRRVVEA  
FVNSGGNAVLRTAEGNISSGMGSAYTGIGSYMSNVITVNNFGGVDVSYGVS  
GAPHVQRTIKTKSSIFTGSSGVITRISVSRGHSVEFMNSRFFTRKTKQKQKVIIS  
SSGGSVSGGSGGASGGSGGASGSGGSVGVSGGGGASVGGSSILGSSASMDTKG  
NLSYSGSGFGTWTIAGAGPNEAGDVQVIGDFGGCTASNSYNGLDLDSHPTIE  
ARRQNVEFPCPCGSNFCRHGGTCVSADPPYCLCPVGWSGPVCEIVKDPRPG  
QRSSRWANPAVIACILVILLAILVIIGAVLLKRRPQPAVVAVVEDGHVHDNV  
RPYHDEGAGEEDNFGYDISTLMKYTYVENGVAGTGGVGHGKFKNGGSSGEE  
EFTATETKPLLQGAMPDDDLHFKTTTITKRKVVHPDSIDVKQFIDTRASEADG  
EYILSIDELHIYRYEGDDSDVDDLSELGDSDEEPDEEEEQEFAFLQDWGKKFD  
NLNRIFNEDE

>Acropora\_millepora.2\_ami\_gi|379080076|gb|JR977745.1|\_e\_3.9e-13

MEGSVTGNILNVVATDADSGDNARISYSFQPGVDRTVFGGLKPDGWIFIKHTL  
DRERQAVYRFGVTASDQGNPPKSSKANVVHVDDANDNDPKFSQNQFFFPV  
AENKSNRTKVGQVSATDSDAGLNAKIVYSLVSQSPQFVIDPDTGIIRTNQVLD  
REVQASYDLMVEARDQGASPRTDKSKVTVVVKDVNDNSPTFRNRSYSQAVP  
EDIPLGSFVIRVVADDPDFGKNGEISYNLTSGHIVDKIAMFRIDRRTGEITTAQR  
LDREQIHRYILFVVAEDHGTTPPKDHVVIVSVEVLDANDNPPRFVNNSFFVNVA  
EKLPGVTVVTTVTAKDIDAGNNGQVRYTIDQGNAGGSFGINDTSGVITLLKQ  
LDYENKKKYQLRVEARDLGQNSRRSYLFVTVYVLDSDNDNTPIFDKNPVTVAL  
REGVPNYFNVTTIKAHDYDSGQNSRIWYSVDSQSPGPPKFKVNRETGVVQTV  
GPIDRESVDEYTLTIRATDQAFTESERLSSTLTVLIIVLDINDNKPDFVSPDRTF  
VLEDEPGFYPIITITSIDRDQGSNAEVRYISIVQGNISGIFSLDPNSGLLKLHGTL  
YERKPTYILKISATDLGTPPQTSHQTLTIDLVDVNDNAPQFNQSLFLGNVYEN  
EPVGTVMNVTAHDPDSGSGALSYNIPRGEVIPRFVIDPKSGLISTNSTLDRE  
EKDVYILTVSASDNAFPFRVATCTVKITVLDTNDHSPVFNPTLNLTVMENRA  
PFMFYVMSAQDPDVGRNGRLRYSLRSGNEDNKFTISEFTGELSTTAELDREKT  
PRYDLHVVASDITPPFYNSSAHVSVFVGDANDNRPSFLRASVDNIRELTPINT  
AIFNVSAVDRDVGLNGEVVYSLSNKTFGIFRVDSTRGVIYTRQRFDFSVKQAY  
TFNCYATDRGVVPRRGSTEIRVLIIDENNHAPVFRRLPYRQQIQPSFPQGMVLV

TVSATDQDSPSITQMSYRLIGNSSYFLLTSSGELQVKHGVYSIPNGTYVLNILA  
DDGGGLSGRGVAEITVGPIMDNPPVFNSTPANVSIPENSPNDHEVARVIATR  
SGSSSGIVYSIINGNDGSPFKINRQSGVVTVANTALLDFERLRYFRIQVIASLESI  
SSPNAYLTLNVYLLDVNDNRPLFNPADISVQLAEDDALHSSGFNARTVVMVT  
ATDLDSGSNQQITYELDSGNVNQRFAIDSKTGVITTTKLIDREVRPFYRLVVK  
ATDHGNPPLSSTSDVSVNIVDVNDNIPSFSGPYTAEVVEDVKVGYVVKRVAA  
SDRDASPNLVYSFSGMSNKDLFHIDRSAGVVSVDSDLDYELTKSFVLNINVT  
DGTYSQSTTLTVNVKDVNDNAPRFLNSSYRATLSEDSAAGAFILRVSAVDKD  
SGTNGEITYAFVTDVPQFTIHADTGSIHATAQKIEVGAQESLFFVVSATDRGVP  
RQRAYVNVKIQISRTPKFTSPSYAASIPENTAPGTEVVTVGASVIDGTRIGFFIT  
NDQDSIFRIGRRTGIIENVQPRLNIEKDKNYLLLVEARDDVTKRSVVVGVNITI  
TDVNDNPPKFSRKQYTTNVPEDVSIGTTILQVTASDDDSGMNGRVVYSIDSG  
NDKNSFMINGTTGEIVTVKTLDYENMKRHLLSVQATDQGSNSLKGFASVAID  
VTDLNDNIPVFHTVNPLSIAVEENSEVGTQFYQVLAVDTDSGINRELTYSITGG  
SGENLFIIDHKSGYLRTNASFDYETKSFYFLLIKAVDSGSPPLSNEINITVYIKSV  
DEYEP AFLNSTYKFEVPGNAKIGDFVGQVSAVDKDGGEDGVVRYSFESSNAK  
VFGINATSGVIFVNKSLGEVESKRKRRSIEREYEQGVGSRRVRRNTDLEIVSLKI  
RAHSGKSGSKFSTVNAEVAVDFACPGCIPGRVDTQSGNALSPIIVLVITVSGIIF  
IVIVVVIAAIAIYKRNRKRGRPSSRSGFDGSDPISVYPSLNGNVNHVESLSD  
NVSTPRSASQERSPLNVPSDSPTRRTNSTDSPNSASSGRGSSDGVDFEVDHPAT  
LAKGDLGSLHSENYVRTLIAPDSGIHQDSQASQLTISDTSSVLQGEGLGVDK  
RQDKIDKILARLGSQESLHVFGEEGGGEADGGVEVGNLLYARLSEVDADEDE  
SIIDGIRPFVDEGHDHPSYGGSLSSIVGSREELTGSYNWDYLLDWGPQFQPLA  
DVFLEIGKMKDDSPPKAMSLSLQSSRDLRNLPAAGVVTTDMLSSISSLPRSPIS  
PPSTRYTSPAFAFNFTPAITPLVTRSPSVSPLDTGTSTPAFTPASATPKSGSRPAS  
MHVLQLRRESHDGSNSDLTHSPSISDNESNLEVDV

>Anemonia\_viridis.3\_avi\_comp10000\_c0\_seq1\_len=3652\_e\_7e-13

VMTVQATENARNIPLARISYVIESGNFLNKFRIGQRSGTISINSPLDYETEDHY  
QLVVRASDDVNPSKEVKVTVLINVTDVNDLKPEFRKAQYLAQWDESVKVGT  
IVMNVSASDGDGMNGKVVWYSIESGDDKDSFSIDRNLGIIRTIKPLDHDIAINT  
HHL SVRATDEGNPPLHSEVSVTIQVLDLNDNPPVFHIPPNGQVKVPENSPISTV  
FYNL TARDKSDSNGRITYSIIGGDGKGLFLIDPLTGWLKTNAEFNYEDKSSYI  
LQVKAIDSGSPPLQSNITITVYIQSVDEYFSPFVKSQYAFTVPGNAEIGDVVGQ  
VSATDEDGGEDGMLFYSFIDPKSDALKINRTSGVITVNRTLNDGSSLLKRERR

SIDSNDGLSIESLHRRVRRETTKENEQIYLRVTADSGPKSKSAIVYVVATVD  
YTCPGCGIVTKGRQTGGGSISGTSLSVIVALAVLAGVILLVLVVVMLLIYSHRK  
RKRARKNPRLKFDGSFDEITVHPPSGNSNHA AVSAESIPGRTPQEYTPLNRTT  
DTSNNVTSTDASETPGSASSGRGSSDGEFEEVPPSIRNGDVGSLHSDNYAVKT  
VIADSGIQDDEDQISQLTISDGSILHVDENKPYRNDKILSRMEYQSQESMH  
VFGEEGGGEADGGHDVGNLLYAKLAEVDADDESIAEVPRSFTEEGRDRAPY  
AGSLSSIIGSKEELSGSYNWDYLLDWGPQFQPLAEVFLEIGRMKDNVDTKKV  
AMRSSGSIPSSRLQAQLPGIATDMLSSVSSLPRSPISPPSTQYTSPA FSPNFTP  
ITPLITRSPSVSPLDTAAVSPSFSPHGSRPTSTHINSTIRLRDSEGDSNSELSHSP  
SISDNESNLEIDV

>Anemonia\_viridis.1\_avi\_comp16780\_c0\_seq1\_len=3703\_e\_1.5e-10

GVPEGNVVLKVTATDKDSGTNAKIGFTITKGNEDDLFKVEPDPNDPNVALVK  
TRLPLDREKIPVHHLEITATDSGGLKDTADVWLTLEDVNDNGPWFQPSFFVG  
TVKENLNAAQFVTLLSAYDPDSPTNGGPFTYSIVNGTLNNNFKLVEPATYKN  
ATSIVNSDGIFDREVTPIWKIGVAAEDSGKPPKTNFTYLYVDVMDDNDNEPFD  
GEMLIILNAYKGEFIGGPIGKPYKADADYDGDVNTYTLNSQSPGT YFQVDPNS  
GNITADPNIPVGEYNLDIKVTESSSGSSPRTNAVNFPKTVTSSVTVLVRRIDPV  
AVTHSVALQFTDLRKVAYFVGEFYDPVVS AISAAALDVSKDKVEVFSVQKAPD  
RPLSVNAQIAVKNGDSYMKPKDVIDKLNPKSRLALGLKVGAIGIDNCAKEK  
KHVGKCVNVVKTSSAYHVASGDYGKVPAPDSTISIVSMDVVLKAQYETIFTP  
QGNC SYN NPCLNGGTCHNSVPYGYMICECPREYRGPRCEQTTRTFYGN SYIW  
LPKLSAYDIGEISFEFMTQEKDGLMLYQGPLTKGGNNGIKDFMAVLLRNGRV  
MVMVSLGSDAITINMTKGPRLDDREWHTIQITRDLFDRKMVRVIIDKCEKASI  
VEENGLVIENRETCEVTKRVFGRKTYLDGFGPLQIGGASTDLSFLGIPTQGF  
GCIRNIIDIYTMYDLRYPLKVVN APEGCEPAPKCADKCNEKGYCEPGLKKSIC  
VCDIGYDGRTCGDRSQASFYLAN SFSQFLNTIRARRDLIPPPESLTNEFYTSIA  
LKVRVDPGSKDCVLFSSNSLGTEFNRIDIKNNVIRYIFRLGDRMKILSIPQMNI  
TDGKYHNVVVKREGNYASMQIDYDGFVAGNTGGVHKLLNMGGGSFFTGGL  
PNITEIRVIEAIIQSGGNAILRTADGRVLASGIGSSRSGTSFGSGMASSLITVSY  
GKLDVKDVVDSQALFASGAGVRGVAIESFKQNMTSIEVLNGRRTNGKFGTAIG  
AQQVSIKNKYINSGPYEGGVPIYDINGNEISTYGSGIKWLLPSGGIQTGAAAGG  
SSGAVHVIGNFEGCTAANRFNGVNLENDESIDKRRQNVVDGCP CETGFCLHG  
GTCVLAGPQYCICPPAWTGVRCE TIVTNP NPGQRPGSRWQNPAVIAMVLVVL

LAVMIIMLAVLLKRRQAPAVVPVALEDGHVHDNIRPYHDEGAGEEDNFGYDI  
TQLMKYTYIEGGGGAGGYGAG

>Anemonia\_viridis.2\_avi\_comp709\_c0\_seq1\_len=4393\_e\_5.6e-29

VFDREAQPTWKIGVLATESNPPKNTNFTYIYVDIEDENDKEPNDGSLRIIVNSY  
NGSFKGGVIGKPYKDDDFDGDQNIYKLDSQSPGSYFSVNENTGDITAQKNIP  
LGDYKLFKFAITESSATTGPRKNAVDFPKTVASNVDVLRRIDPVAVKNSVAM  
QFIDMRKVG YFVGDFHDTFVSTVGSILGKSSDVKVFSVQKAPDRIVSVNTFF  
AVSSGDDEYMPPLDVINALVKKEESLEDLGLKIGAIGIDECAKEKHKIGKCTN  
LVKASPAYTVASGDYGVKVPAPASSLTIVSMDVVLKANYTVIFPPIRRCKPLSP  
CLNGGTCFTTVPECPGFVCKCPPGYHGPCELTRTFYGN SHIWLPKLAAYE  
MSDIEFD FITLSPDGLLLYQGPLEKDSNNGAKDFIAVPLVDGRIQVHLSLGHEP  
VVVKMDKGPRLDDGEWHTVHVARRHKKVEVIIDRCSTAVLVRKLDGHIEN  
RDSCHVYGRTLGRSVYLDGFGPLQIGGVTNPDLAYPDIPYKGFRCIRNIKDN  
SVMYDLKNPLKVVNAPEGCELAKPCPNCNNQGYCEPLLARNSICVCNVGYS  
GNNCKGRGPATFYLDNSYTQYLVKTSRRKRRELVPAPKSLLNKYYT AITLHV  
KVEPDASDVVVFLASNHMGTEFQRVDVKDHKLRYILRLGNRMLVLGFPQIN  
ATDNVYHTVVVRRQGNRATLQLDYKGYQLGNTRGERTLLDMGGGTLFAGG  
LPNVTVVRIVEAILLHDGNISSDSTMALGSGFGAGVSANLESLEQYFKVAR  
DSAGFAAVADNVKGVSLKGLHVSSGEAGGQHERSKREAAVSVLGDFFGGCI  
AGVNVNGADLANDPSVTVRDQNVITGCPCLTNHCLHGGTCVNAMPYICIP  
SGWTGPRCETIVTQPNPGTRPGSRIISPGVIAMILVVLIAVLIIVAALLIKKRPVI  
APVVVTDHEEGHVHDNVRLYHEEGGGEEDNFGFDITKLMKYTYIETTIPRH  
PDSRITEGDVDVPESAPLLQGAAPPPSSGPTFGMTGKPGPKMPKYMEGDDIGD  
FITTRVTITNREVYLA VDELHIYRYEGDDSDVDDLSEIEDGGDEDDEYEQEFEF  
LKQWGTFKFDKLSKMYEGVDD

>Clytia\_hemispherica\_che\_XLOC\_017037\_e\_8.2e-26

GMEIYTVKATDKDRGTNGQIKYSITETISPGKNDNPFMRDEDTGKITLARQLN  
YEAAGEYFVTVKAEDQGPMKH YALQELKIVVKDINDELPTFSETIYSEVISMT  
QKPGQSLLHVFASDLDSGLNGKVQYQIVNGDYDGTFTIDSATGIITLRKPIALL  
QDKDGKLIKTFTLNIAKDSGSVALSGQAVVQFRAVIKEGPPKFALPKFVFTT  
KENKDPSLSLGRATAVSVDELKYTIHKGNENGLFKINANTGTIYPTRALDAEE  
NTKYLIYVRATDLSERFAESSIEINVENVNDNLPKFRNAVNSLIEAIVPRDSPV  
NTIIVKIDGYDLDIGDRVKYNIIGSARNYFQIGPYNGVIRSLKSFQGLAVGTNQ  
YTFQVQATDTGGFESAAQVRVLLVNKLPGEEIRSVSESVALT DSSIIRKVGGR

YINSVFKIIPDENPFYIDDQSSGNVRIRSKIDYESTKEYTIFIEETNTDDVSDYV  
TYEVRIQVTDENDNSPVFTMKDLIGKVNRNAQLGTTVLQISVEDEDSGDAGTI  
DLQLEPDTIPFSIDPFTSEIKTSSWEINQEWYNVTIKATDRGKPRRTTRQNVYIK  
TGENPPEFQKDVYHFVARENAEPGDFIGRVSARSLSGIPVRYDIESGNQKNLFS  
IDSQGLITLQGRLDYESGSALFDLIVLAKEHKSPLSRVNVAIQVTNENDNAP  
EFTTFSYRPPQPISESLGIGSTILTVTATDKDCGEFGKCAGGLLTY SINQFKDIF  
KIDPITGAITNIGKLDYETHKEYRFQVEVFDNGDSPLKGVTDVVIPIKNANDN  
HPIFKPKMADLSMVELIKSGTVIFTVQASDPDNDELTY SIESGGDSNFEIGPKT  
GVVQITTKGTPSFTQHNYVLNISA YDGLYKDYFALKIRIDDVNDNSPLFEDCA  
KYKPSVLEQASVGAYVIRVTATDGDRGRNGEIEYELQEPQQEQGALVEPAFRI  
DNATGEISTNRIFNREQSSYIVLVIALDGGNGRSTAERNSASCQLEIKIEDIND  
HVPVFSNPSYDISISEDTSIDQVVIEVSAQDADEGTNAEIVYSIKQASLTPEFKID  
PNTGAVSVAQSLIGKNQDWYKFQVEARDKGARPNFASIEIDINVRSSNPPRFK  
QPSYKTRLSEVDGAGSEVLTVEAVSQDTKTTGKVYY SLLPGNFPSTNKPKTFT  
IDPETGVIKTSRLLDY EKLLKYDLTVSAKDERGMKSHIKVEIEIFDVNDNSPIFI  
TNYEFGK VSENKPPGQIVEQVNATDLDSGKFGQVTYSLVNSKEGRMFSIDPV  
TGVIKTKVRFDR EQTPRVTFNVRATDGADPPLDNSVA VTVQITDVNDSPVFL  
YKQYNKTVMEDVKIGSNVLEIEARDKDAGENARLNYYIVSGNDKGYFGTKSI  
HRTDGKSIGFVTVEKELDREETETFLKIAASDYKYDDTTTTVIINVKDVNDNN  
PRFLKPLYNATVPENSAPGIYVTTVA AVDADSPETQQPITYQLAKEATGYFTI  
DKNKGIIITGPVPFDREEKPIYKFLVFATDGIRFGQSVIKVNVLDNRNDEKPVFL  
DGPYIRKVEENKEPGKAVGYVLAKDRDEKDNAMITYSLRRHTDRFRIEPNTG  
LIRTKVKLDRESNDNHFKVIVRATDHGEPPLHGETEVTILVDDANDQYPYFEK  
DVTRVQVPECYNFGDTVTRVVARNDNLGKNAELFYAIARGNSPRHFRIDNK  
KGIITVARSLDYETEKKRFE LFISVRDGGYIELISKKNASVIIDIQDCNDNAPRFS  
KATYKTNISEDANIGTVVIK VSAQDADSGVNKEFDFFIVNPDENYQFDIRRDE  
NNAEIGIVTLAWKLDRETLSEHIIQIGARDRGDAPKTGYAQLTVLVNDVNDNP  
PSFRPPDFCGHVEEELTGTQQLVTTVHITDPDDPVKNQCPC TFDLIDPYGLFTI  
DYNKADSYKAFIKTKPNAKFDRDVKDQQLYKIKVKAIDRGGLESTTNVYVE  
VGDKNDNKASNGGKMTFDVLSYNGKIKNAEIGRVLIIDNDRGLNHTYK HRL  
EPKSESFTINEFGVVQVTELGAEEGNYQFKVVSRLSGQDVTSSIDINVANIPD  
EVVQNGFPLRMRGLRKPLTCNEIKYVDFASIISKVLRVDRSQVVVFSVQEARS  
VYRGVDIWFTILKKVGADSGYDDVEYMSYME LLTKISEKREELERETGSEILS  
IGIDACSKETCRDGFCSNVIQSSKYTTVSNENGIIPAQKSGKSIVTFDVQVLSR



CTKQAKGPDLC TSLNSKACLNGGICVPLGSNGYRCKCPSGFDGPQCQVTRH  
IKDNGYFWLDTLSSFYEGEIEFEFATQRQSGLLLYHGPIWKWQKTDISDFLAID  
LDNGQLRISVSQGERKVFQKTLKSVHSTLADGVFHHVRIYKREKFIKVVLDR  
CRYAAIEESWDKPSIQDKSKCELTGTIPGRWKFINGIYPLQVGGVRDYTLGYP  
NRDVNDRTHRFRMPFKGCIRNIIDNGRMYDLRFPLLNYNTELGCSLFTNMFCP  
ACYNGICDMSMLNVMTKSYACQC SHGWMGSNCDQRVEAYTYMSNSYSKY  
TITKQPVTWYDRYVTHYKVQVRTKGDGVILHEEGSRFQRRFEFSTLEIIDRRL  
HYHFNLDGDNKTLVLSNANITDGMWHNITVHRIGNQATLEM TSNNEIVGRV  
TGSKGRHQLLDTSGVLYVGGNLYKINGDVEVVDNFRGCIAHNTYQGNYLDR  
KIGPGKVEQESKYVEIYRENVYKNCSCDAGAASLCLNGGVCIAGSPPYCLCY  
FGWSGPF CGIKPGDAPLGAAPAMGSNGMTILVVLVLAFLLVLVVALAVANL  
SKKNKAIPYVDDNGRENIMPYNDEGAGEDDFENYDLEKLLMHTGGRDLIFM  
DEYRDEADALARANVAKKSAMAAGGTASSNIAVSGADGSGFAGAASALFG  
ASTKSQFIQKDEENQQLLQAETA VQTENIETTFTSSFKESESAARARFERSRAD  
DIDVAAFINANLTDANNDDAYHPKDTLLHYGYEGQDSDVEDLSDLDFDPDD  
YDEDDFTFLRQFGAKFYEINILYNPEDFYEEDDV

>Exaiptasia\_pallida.2\_epa\_XP\_020900069.1\_e\_6.5e-29

MASYGVNSVLLLAILPVALFITSIRTVDGRQIIPITIDEGRPKDYAVYTFDSSSG  
DTFSFYKPTESKAGSWLKISDSGSITTTTEL PYNVGEKNVYDITVIQKPSKQTD  
GGKAHTLRLTVRDVNNFSPSFAHPVYYAHVAEGSPTGVIVDGLEKCYAEDR  
DSPQAGSVQSYSISSGNEKGYFAASFNEKDGRKFLVLKTTSTVIKRDPKNPDI  
VLTIEAKDGGSPPLIGTTKISIRVRDSNNNAPVFQPTTYSANIDENKPVLSKVLR  
VSATDADVSTNGAIYYMSTLDPSFSVDAITGDIXVARPLDYSVKXXHTLTIM  
AIDRGFPRKISAAATVKITINRDL PDYPPTDTPNPGQNTKPYFSQPKYSFSIAED  
FPTKGALLFMRASDNDPVGPNKRLTYSLSGGDGKFRIDPNSGLVTLASQVDY  
NTAPAGKAYTVTITATDQGNPVQQTTTNLVIDIQEVNKNRNFPIFDEQQVAKT  
IDESARKGDAVYKATAKDADSGDDGKV VYSIEAGSGLGYFKIDPNTGSITVD  
APLDREKESYYDLVIRASDSATFPLDTRMFLMINLKDINDNNPYFTQPMYLAK  
VPEQSGDDTFVTLVSAKDPDEDPKISYSLDTFSQLFDIDSQTGIVRTSRALTGN  
LLKKKYELLVSASSSGAKAGGQINITITSEEDKPPVFNLEDNSYKVA VPENM  
GPIPNLK CIAAVDSNGKPVSYRISSGADNIFGLDENSGRLYSTKGF DYEEVDR  
YNLRIEASTGSSSDQVASVPVAITVKDSPDPKFLKSSYVVSISENTGVGTTISA  
RLVIDDRDTSTDQFDCSLENVNSPKVTEYFRVVL SGGECKLVIKKKLD SYDV  
KEFKFDVQATDENFRHMYARASLVVKVDDVNDHKPVFSKTSYWVSIASGFK

TGTKLVELSAVDRDTGTNGEVRYDLVRSQDSQKFRILNNDLLSAVTLAPNVR  
YQVQVTASDIASSTPQSSKVTVYVSVYDPSESPVVFDDKSKYTKSLSEEAAKNTP  
VFKVRATKSGVTTGITYELVGGHKDLGKTLFKIDSSGQVLLDSKLDRETASS  
HTIYIRATYLGKPVAMATDVEGVITVTDVNDNSPEFTFEGSSKIITVDNYTPQD  
SLVIKALAFDADDGPNGKVSYSIAVGGGSPPFKIDSNTGEIKASREIVFSSGAK  
YAIKIRSSDGGSPQKSTDFTLNIEVVNTPRPPRFKDNSYQFSVNEITEPGTKVGP  
GIQAEYSKAGTFLKYSFVEGNKDNTFCIDATGQLYLARRLDREKVSSYRLKV  
RVELGKSSDDTIVNVNVDDFNDDPPHFDKSVYQLKIEENKKGTLVPPVTAVD  
HDSGTNGEITYSILQSIRTPSKGFFKIDTTTGQLSVDTELDREKAAEHVLFQAK  
DKGNPSLTSIAQVNIDVQDVNDNTPKFAAASYRAKIALDAAIDRSVIRVQASD  
LDKKGTPNGDLEFTILSGNNGDAFKINNQGVISIKKPLTTVADDRFTLDVRAS  
DKGNPPRKADITAQINVYLPDGPVKFVVSPTVYVTEGVTAGNRVTGVKAAT  
SEALTYSIISGNEDLMFKINPSTGQLDATRTLDEYEEKQRYELEIEARDTRDRSA  
AVKLIINVNVNDNKPTFRGEQDGVVNRKAIGTCRPTNIIPGEIVASLGVTDK  
DKGDNVTFELDDQGKKYFEVDPKGNLRAKQPLTGIPSPFTFKVKAKDDGKPP  
QENEVDLRIVFVYRDPDQDPVRVDVREDRPVGSVIARXPYLPNGTIALLYPE  
KANFSIQSNGDVILLSGLDYETQRFHSITVREKQPGTDLTNDVDVEITVLDVN  
DNAPYFTPAPRFAQVNTNSRAGAKVYQLNAEDDDGGSSGLVGYQLDKPETN  
ARRRRRSLPQSPFTINPNTKQLEVAGPVGDKRYKMPVEAFDYGIPRLRSSPIVL  
NLDASKAGQVSPRFSQVSYSFKVREDAPYLTVIGTVKARSISGARLEYTIVEG  
NVGDKFKALENGNIVLNSLLDFERDQSVYKIKVRATEQIPDGLFSVVDVRIDV  
IDANDHVPYFSQMLYSVQIPENTGSGKIIHNARAYDCDCTPNCLCPSGKLRYS  
LFPNKEEGNFAIDSNSGQVSVDKVLDYEVKKWHLIKIIASDSGKKVYRGICY  
LNVTLTNINDNSPAFSQGSYNFHIAEKASVGVPLAVVRANDPDGDVATYKGG  
NQQFKVESNTGVISLKSSLPSSKTQYTFQVGAEDPGGKNNFVSVRIDIDDAND  
NRPIFKDCKTKSVNIEENLPKGHRLTKIEATDKDRGKNGRITYTIMDAKSQSLF  
QIDSNTGEIRTLASLDRENKEIVSGPLFVIIKAEDGTINQRPSERLLDYCFLMVN  
VLDVNDNRPYFAEVKYYGSVINTAKNGTAVMTVQATDNDIGPNAEVKYSLL  
KDEGGLFRIDPNTGVVSTNADLTKYTKKTFNLKVAARDKQPRAGEQPGQNK  
LYSTDIEIXVSSRAPPKFTQSTYQGQVYENVDIGTVITTVKATPSTPGSQILYQA  
VNTNPLANELFRVDPNSGVISTGAEGIDYETITNPKKEYEIHVIAKETGADALY  
STCKVVIKVLDRNDFTPFKMGVKTANARVLENKNPGETVIEMVAYDKDTGT  
GKDITYSLKDPNPNPFAINSKTGLITTKKLDREVTGPGYVVTVIATDGGGNAQ  
PASVDIIVVDQNDQPPVFKPKVYQGSVAEDAKIGTSILSVYATDKDIGDNAAI

RYFISKGDPTGRFDVRTEGGGKEGVVFNGLDYEAVKSYPNIEITATDGKY  
SDTATVSITITDVNDIGPVFIQPMYTAVLSENTKPDVAVTTVKATDVDGGLPL  
KYSLDDNGKGYFVIDSNGAIKTGTTPLDREESPVKAFGVIASDGVHSTKAEVL  
VNLTDVNDNAPRFPSSPYIGYVKENKPAGTSVMYVQAVDDDDPFAGDNAKV  
TYSLTDSAGGKFKINPDTGKITTLATFDRETPPDRFKVKVKATDGGNPKLSGT  
VDATIIVTDENDFAPEFTEETYKGTVSERAPPGFRVTAVSATDKDTGPNAEFE  
FVVIDGNYPHAFYVDPYNGSVLVSGELDYETKKNYRLTVEVYDRGNPPKKG  
KKLAYVEIEVLDANDNAPIFVPPKYDKTIPETNDVGKEILKVT AIDKDSGTNG  
NITFSITGGNIDDIFEIKSDPKNRSIGIITNRLPVDREAIPVHKLEVTAKDPGGLT  
GTGDVTLTVSDVNDNAPWFVPPVFISRIRENTNNRQFVTKLSAIDPDEYVDGR  
TITFTLVNGTQGDNFRIDTSTYTNDSVDVYAYGSFNREANPVWKIGVLATEN  
LPPKLTNFTYIYVDVLDENDNSPSDGSMRIIVNAYNGKFKGGIIGKPYKDDD  
HEGDTNTYTLDSQSPGNYFKLNSNTGDITAPENIPLGRYKLITTIKQGGSTVKS  
NVQVLVRRIDPEAVKHAVAMQFMDMRKPGYFVGDYYDKFVEVMSGILGVS  
SDAVQVFSVQKAKDNLISVDVFFAVSDGDNKYKKPLEIINDVVDKQDRVKNL  
GLKLSAIGIDECAKEKRKIGKCENIVFASPDYSVASGDYKVPAPDASLTVVS  
MDVHLKANYSPIFPKVKTCNPENPCLNGGTCHPTVPECPGYVCKCPPGYHGP  
LCELTRTFYGNYSIWVPKLTA YEMSDIEFEFTTQTADGLLLYQGPKLKEGSNN  
GAKDFIAVALVGGRIQTHISLGHEPVVINMDKGPRLDDGEWHIVQVSRNHKV  
VEVIIDQCSNAVIVRKVDGTIDEDRRSCHVYGKVLGRSVYLDGFGPLQIGGVR  
YPNLKYPKIPYKGFRCIRNIKDNGRMYDLENPLYVNNAPKGCALAKPCPNC  
NGKGYCEPNIARDSICVCNLGHSGKNCGGRGKASFYQANSYTQYLVRTSRRK  
RRELLPPP KALLNKYYTNIALQVKIEPDASDVVFLSSNRMGTEFQRVDVKD  
HKIRYILRLGKRVLILSFPQLNVTDNVYHTVVIKREGNRASFQLDYNGYELGST  
RGERTLLDMGGGTLFAGGLPNVTIVRIVEATLSDPNNL VISIGEDSVNRVARS  
VRSLASYMKLASDSTGLTAVVDQAKGVLENLHVFSSENEKPKRRSKRDAPIS  
VLGDFGGCISGASVNGADLES DPSIVVKRQNVVDGCPCVNNHCLNGGTCVN  
AMPPYCICPPYWTGPRCGVIITKPNPGPRGSRWANPAVISTILVVLIAVLAIIGA  
VLLKRRPEPLVVPVDTQDAGHVHDNIRLYHDDGGGEEDNLGYDITKLMKYT  
YIETTGPAPRPRVNEELVDVPEKTPLLQSAPPDGPFTFGFTGTRPPSKMPK  
YVDGDDVGD FITSRVKITDREVFLAVDEIHIYRYEGDDSDVDDLSEIEDEEDE  
DDEYEQEFELKQWGTKFDKLAKLYDEVDE

>Exaiptasia\_pallida.1 epa\_XP\_020900065.1\_e\_2.2e-26

MVARHTGLCAVTHIILSSSXIFCNGQNTIISEEVMENQKTGSVVYRFQRPPSG  
QEYKLIRSYDEDTAYRLFVSSDGAVTTQQPLVYTIDRPNKYALTIVRRPQGG  
DEGGIAWTLEVTVKDIDNYQPTFGANVYEGRVREGSPANTIVDGLEKCFEAD  
RDTSGIDQYKIVSGNEKKYFQIETVKKDRTFVVLKTTNVPIVRDPDDPYITLTV  
QAKQARKPAKIKIYIEDANDNEPKFAKSSYTEIVDENA AVQSSVVRVTANDP  
DVGTNGGLYYYYLQPLNDYFMVDAITGLIKVAQTLDYAKGQSNSTLYARDR  
GNPTKSSSTTVTVNIQRDIAGYPPPSSDPGTNTKPIFPQDSYTTSIREFPIGGV  
LLLINAVDNDPPGPNKRLTYTSLSGSGSTDFNINSGSGLVTLAKTVDYKLSGSN  
QYTLNVRAQDGNGLTADTQLIIDVLDVDENYHAPRFNPQQKLEVEDVAK  
GTSVTTVSATDQDTGGPDKQIVYSIIQSGMGIFKVPNTGEVQTDALLDREG  
RTWYDMVIKAEDKATFPKSGNLYLMVNVKDKDDNNPXFTEPMYVAKVPEK  
APENTFVTVVRAEDPDKNPTISYSITNSQTAFKIESSTGVIRTRRSLEISRGEIEF  
ELTIQATSSGKTAAGQVNVTVTSRADSAPTFMNTAAYKSVSVPENQGPVSNIL  
CIAAVDSSLSPVAYQLSKLSSELNVFAINKNSGRLSSTKSFNYDENDQYQIQVE  
AQLTSKKTASADIVISVLSQKDPPTFSKQDYSVSVLESKPVGTTIRTGIKIIDQ  
DTAPEQFICLENINDLKILEYLSAKRDGDQCNVVTKKTLDTSVTPQFQFAMR  
ATDKNLYNLYAQADVTVLEVKDENNDPVFSQTSYWVSVYS DIAKDANVLT  
SATDRDKGTFGEVTYQLVTANNWFDLVDNTGVMSTASKLTVNTVFEVKVK  
ATDGGGRAAEVVVKVSSYDRSDTPVKFDQDSYASILEDKPLNTEVVRVTAT  
KSGSSSGITYELVGGYKEGGTAIFRINGNGQVFLDSSLDREKSSYTLIRAKH  
SGGSIELVKNVECVTVGDVNNKVPQFTFEKNPKYYTVDNYSPADTVFGRA  
KAIDL DAGNNGKVTYSIDSSSGINLFKIDGEGTLMTKTKLTKVETYTNVVL  
VASDGGSPQKTSKTTVTIEVVKAFPAPKFKESSYSASVQENARV GELVTTVK  
AEYDDSSAFLQYSFLSGNTDS AFCVDSNGKITVARPLDREKVSQYTLKLQVA  
RGKDKATSTVVISVTDINDDSPVFEKNLYQFKVKENAAISTTVGKVVAKDFD  
SGSFGEVTYKVLQSVDIESKDMFQVGAKXGIITTQKTLDYEDIKKHILFIKAED  
NGMTRLGAVTEVQIEVEDVNDNPPKFSAPLYRAKVALDAAVGHHVVQVAA  
TDLDSPKNAQPMYSVVSNGNDEKAFEVNRENGLITVAKSLTTVAADKFIKRIK  
AKDRGDQPKSDEVNVEINVFLPDGPPKFVVSPIVVKVTEGLAANKRVAVAKA  
ATSEALKYEIISGNTNGMFKINPATGVILTTRELDYEEATKYS LXIVAMDTRD  
RRAQVEVNLQIINTNDNKPMFPGEIDGQIDRKVSGPFSKGVVVTSLAAIDKDQ  
GDMVKYKLSPPSVYDNFDIDSQGQLIAKGNLRNIPSPYRYKIIATDSGSPAQVS  
TADVRMV FVNYPKQQPVRAMVPESTPVGSNITRVPKYFPSGVFEIIFPEKSN  
FTIDNKGIVRLVGQLDFEKQAFHLITVXEKQTVDSKLTNDVDVEIYVXDLND

NKPYFTMTSLKASINRNARAGANVFQLSARDLDSGSNGQIGYQLLNSSFPTI  
NPFTSKIEVGKALLGASFRPEALPFDYGKPGNNGSKATINIETTQTPPIFSRASY  
QFTVSERAPIGYSIGKIEARSASGARLDFKIKEGDPNNRFFVKSDGTVVLNSLM  
KNSPAQFKLKVEAIEQIPNPLSSTVEVVIDVLNGNDFYPYFEKLLYTVTLSEDQ  
GIGSVIVTVKALDCDCSSACQCKRGLLKYQIEPREYFVVEDEDTGQVMISKTLD  
FETKTEHLLKVSATDTGVVKYTAAYVVFVTNTNDNKPVFSSNAYEFRVTE  
NAETTANLGAVVASDDDGGQVDYSIISGSEFKIISNTGVLRLSXXIPKDNKKN  
EFTVTVRAKDQNNNYGPDAVVRFNVDHVNTVRPTFXSCGKATVQEHRSKG  
QVVTKVEATDNDKGRYGEVEFSLQPVGQNFVKINNRTGEITTTASLDREKR  
SSYTVIVRAEDGGHGKLP EERLLTYCFLTVEVLDTNDNSPKFEARPYIATTQIG  
QGKGKEVVTVNAVDADVGTNAKIRYSLKTSSDKFTIDQNSGTISTKVDLKSQ  
DVGKVLTVACSNVPAQAQDSQTPEHEKETVVEIYISDQPPPCKCKEPKGFLEFV  
SEAVATGEDVGTIVATAQAPGSSIVRYSPVKANSYVDERFSVSPSTGKITTA  
QLDYEALPQDDKTFRLQVRAQQDGTNLFTTCEVTIRLTDVNDDKPTFDLGSY  
DARVLENAXGTTVVKIMAKDRDHGSAGEVQYSIVGNDPNFQINSATGVITT  
RQVFDRETKDVYSITVQATDKGTNPGALSEEVTVRILIVDQNDNGPKFSKPVY  
TVSIPENIQKGTVVYSELEATDKDIGDNALITYFISGGDMSGTFTVNTVTGKKT  
YGALVVNRKLDYEKKKTYQLQVSASDGMASASATIDVTISNINDVAPKFQNP  
VYATKVAEGXREGVFLRLTATDVDSTAITYSLQSSAQGFFTIRTEKTGSTFA  
GIIETGSTKLDREKTPLMTFEVYASDGQYKGAQEVQINVTDINDSPRFPDDQ  
VYVGYILENVKAGSSVMYVQAVDDDFQYAGGNADIKYDLTNNAGNSFKINP  
NTGLVSSLKVFNRDITDKSPLTITVRATDQGKNPQSATR DATIFILDGNNHKPE  
FTKXVYRGTVPEHAPPGYRIA AVSATDKDTGPNAELEYVVESGNDPHVFYLD  
PYNGTVHVSGIIDXEVKRSYELTVKVS DRGVPVLAADXTAKVIITVTDNDNP  
PVFSPKEYKKSVPENXQVGTVIVKVTASDADSGNNAKFD FSITKGDPTDLYEI  
VPDSKNPNIGLIKNRLPLDRETPVSELEVTATDTGGLQGKARAVITDDVND  
NGPWVFPYFEGKIKENIDNAQFVTRLSAYDPDTTANGKPFTYSIYNGTVNDN  
FKLVEPATLKDVTSMNSYGRFNREEKSTWKIGVTAVDNGNPKKSNFTYVY  
VDVEDENDNEPFDGSLKIVVNAFKGQFLCGSIGKPYQDNDFDGDVNTYTIE  
TQKPGNYFKIDPNTGIMTADKEIPMGRYTL SVKITETNRGSNTKSVRSMISVS  
VRRVDPDAVKXGVTLQFLNLRKVEYFVG DY YEKTVDLIGSFLEASIE MFSIQK  
ATNNSMAVNVHFAAKKGGSYVKPLDVINNL SGKKKEFN NIGLEVGSIGIDAC  
AMEKRKVGK CINEIEPSSKCTVASGDY GKVPAPTSSISVVSMDVTLKDKYVS  
VITPQGKCATSNPCRHHGGTCHDSVPYGYMLCQCAREYRGPHCEVTTRXFYG

NSLIWLPKLSAYDLRDISFEFMTEKPDGLMLYQGPLKEGGNNGEKDFLAVFL  
QGGYVVMMSVFGSEPTTISVTKGPRLDDKEWHVVTIKRDMVDRKLVRLIIDR  
CEKATIVEQNGRVFENRDNCEASKKVFGQKTYLNGFGPLQIGGVDTDVSWL  
GVKTKGFDGCIRKIIDYETMYDLQDQPLKVVNSVTGCQPAATCPNCNNGY  
CEPGLKKSICVCDIGYMGSDCTARSPANYKANSFSQYLLNSARARRDLVQP  
PKSLTNEFYTSIALKVKIDRDMENCVIFLSSNSLGTEFNRIKDRVLRVYIFRLG  
DRLKILSIPQMNITDGKYHTVVVKREGNYASMQIDYDGLVAGNTGGINKLLN  
MGGGSFFSGGLPNITEVRVIEAIVRSGGNTVLRADGRVLAASGIGTDGSGGMS  
FGTGLTSTMITVMPSGKTVVDSFSDPRGLFVSGMGVVRGISIDKTTXDGKEIVE  
VYNGRRTVSGFGTAIGAQGNVIKKNYPSTGPYIDGVPIYNVKGTQILTYGGGI  
PWTLETGXATSESKPVAVIGDFGGCTASNRFNGLVDLKDADAVIDRRQNVDPG  
CPCTTGFCCKNGGSCVNGDPPYICPPGFIGTRCETVVTKPNAGQRPGRMILP  
GVLALILVVVFAVLAIMLFVFLKKRAPPVVPVTLEDGHVHDNIRPYHDDGA  
GEEDNFGYDITQLMKYTYVEGGGGGGYGYGAGGGYKGGGAGYGGGGGG  
GGNGNGIEENITVAEDKPLLQGA FNNGQQFGVTTITRRRVINPDSMDVGNFI  
NQRVGEANGEYFIAHDSLHMFYEGDDSDVDDLSELGSDNEEDDDEQSFD  
FLQRWGRKFESLNRIYNIDS

>Hydra\_vulgaris\_hvu\_XP\_012558722.1\_e\_5e-27

MKIVKHTFFSYLIVISKMFSEIKLIKFFITIIIVSSVNSNFLTVNVDDESSVIGSKIHE  
FPSKNGFYQYITYQWGDPLALFRVEPNGNVVLKGQLNFELDKPNYYFLTV  
VLRNKNKKYGGTAYTRKFQVIDSNNHSPKFSKKEMYVGEIEEGLPAGSIVSG  
LEDCAFATDLSSGIKDYSITEGNNKNEFELSVRDVNGIKLLVVRTLKSIDRDEI  
RYTPFLDLGIQANDGGIGENQKFVKQTIRIHIRDVNDNPPVFIYNSLRRSVQEN  
AKISSVMKVSASDNDEGPNSEIYYYFEKQVDDFYINPSTGEIRVASNLNANV  
KSSYELVVIAQDKSNEPRSAKSNVYIQVIDVSNYPPENTNKRPIHFSQNQLSV  
TIREDLPVKSFVYIVLTDADYNSKLEYSLSGSDNLFYISKKSGVITLAKSLKT  
AKQQEYMLVITVKDGFYISVSLTVKIQQYNFNMYSQFNPSTVCIDILQNTNI  
NTQLDVTVKATDKDSGINGEVSYYAVGGSGIGYFRVDKQTGAVTTNTIFKNI  
GSYSLYIKAQDNGKFQRYGMMFLQVNVVPSFQSPPIASRTMMTETIDEGEDQ  
DSFVGAVFARSPGFGRKVIYEISGNSPRGLALDRETGVITTTTRQLDFEQDAYLF  
MEITIRVEGSQQFTKTALYTEIINLNDNPPEFFRSAVTVYVKENSGIIPSLCLF  
ATDKDGNEALKYSIESGNIGNVFQINSETGQLNVKNLDYETRANLNLVSVN  
DGLYDAKASVNVIVKDSNDPPIFSDFYTAKVEELANENTIVKRLGVTSELSG  
KHTCIWGVENLTPEILSLFILKTEPRACLVSVRNKEKLVWRKEKNVFEFNLHA



VNVDNRNEFSSAILQVTIEDKNNNKPIFSQESY AISVIGSIPLGKSVVQVNATD  
EDGGVNGRITFDIQEGPDSNLFNINPSG DIMVKSSVEKNRLYLITVNARDQGV  
PSLMSSTVVKIIVLDETV ALPVFNPSGPLFLSELSVGAAVTQISVNEVGSSFE  
IVGGNKGGTFGITSDKIILKKKLDYEMDTTYRIVIQATLSDPQRFTDKIIIFQIED  
SNDNSPVFVVEDPSVAMEIYVDKYSPEGSIVAKLKA VDDDSGLNGQIEYTL  
GVVPFVIDAEGVITCSREINDAIASKFIFTVTASDKSQSVRRSTKISIIAQVKDGI  
RPIIFTQSFYRGS LVDNVPVGESIVTISTNEVDSSSTTSFRISSNLSNNFCIDFSK  
TLFTQKAMDYDLARNNKFPVTIEMINGYQTSKTTVLLT WSDENDNIPFFTNG  
VGPIVREVSETQNVGYVIFRAEAKDQDAGDN GRITYSISQVISSGRSENLFKID  
PVTGDLSIAKLLNFEETSEHTIIIIKAEDNGDTIKRFTLQEVKVVVKDENDERPT  
FSESNYNGFISINSQTGTEVIKVF AADFDSGAFGKVEYAIIGSDYAGTFVIGKSD  
GIIYLKKPIALLNEQTFSLK LKATNMNMEGQAMVYLTA VTEEGPPKFV LNKF  
TFNVSENNNP KDVLGNCKAISLDTITYSIERGNDLKLFEIDTRNGNLRSTSSLD  
AEKQVQYIIYIRAADLSE RFAEASVEINVINVDNSPFFRAAINNVIEVIVLRSL  
AVGIPIVDVQGV DNDVGDLSYKINSGPARGIFHIDNNGVIRSLTSLKMLSLDT  
NVNEFEISAKDSQGLESSAQIRVVLVNYRPGGIIVRSV GEMHLP SHGEI IKDLG  
NQYPRASFKIVSPLYNPFIIDESTGYISLKEQLDY EKTTOYTIIVQERNTQSEHE  
YVNYNVRIQVLDYNDNAPKFYMTSFLGKVNKNAQPGTPVIKLI AKDEDSGD  
AGIFGFEIISENIPFSIDPVTSEIKTTSFYLTENWYNISVIASDKGQPSLSSSPVTIFI  
KTGENPPEFQKDLYQFSVKENSHAGYTIGVVSARSLSGITIQYSIEGNVDNLFV  
INAQGAILTQ GALDFESGDSSYSLTVQASEISSKPLKSITNVIIQVINVDNSPEF  
SMAEYRSK SIMENVPVGHTVMKVEATDCDCSQTCECAGGLLVYSMDKFSDT  
FRIDHVTGEIKIIRSLDYE AISEYRFQVKVKDTGVNTNTGLADV VINVANVND  
NSPKFTPDNGVVSIAENIQRGTIVITVQAQDL DGDVVKYDLSSQDNNNFEIGK  
DTGVVRITTVNNPSFLRDDYILNITATDGINIGYFALKVIIEDVNDNSPIFRKCS  
QYKATVPEQMPINTKVIQVSASDLDRGRNGEVEYDIQETQKDNPNKFSADFKI  
DNTTGVITTNK VFDREIKSSYIVLVIALDGGHGRDPAERN SGCQLEIQIEDIND  
HSPIFSVQKYDISIAENTPIDSVVLEVSAQDQDEGKNALITYSIKPNVITSNFKID  
SSSGVILVAESLIGKQERYSFQVLATDSGTPSASSNVEVVIYVQPSNPPKFTML  
SFKASIQEDRKPGENVLKLEAKSQIEGDLENKIFYSILPGNLPSTNKPPTFIVDS  
ASGEIKIAKILDYEALNSYVLT VSAADKRGMKTNAKVFIQIIDVNDNTPLFVLS  
TYEFGKVAEGKSAGVIVEQVNATDADSDINGKVLYSLEPSAEADMFSIDPVT  
GQIRTKVVFDREITPKLTFNVKAEDQAIGKRLSSVVYVVTIQITDVNDNEPYFEK  
KIYNETLDENKKIGSKILELLAKDKDAGEH SKLNYIISGNERGYFGTESVHR

VDGSSIGFVTVAKALDREDIEEFALQITASDSKYNAFAWVYIKIRDVNDNDPV  
FDESLYNSSIIENSKSGIFVIKVHATDKDTASVQLPITYSLSLEIQGYFIIDKNTG  
EISTGLMHFDREQKAMYTFVYAFDGERTGSSTIKILITDVNDEAPKFNDGPY  
LRVVQENQKEGAIVGYVTATDQDEGENSIITYSLLQSAERFVIDPNTGLIRTSK  
VLDRESKDFNNFTIIVAATDHGGKNSLTSSVEVILVTDANDQYPYFVPKVYE  
ATLLECTFIGDHVTTVTAKDDDEINTVNTELIYSITSGNTPRRFRIDPDTGLITV  
AHRLDYEKEKRYDLYISVRDKGLPQLIGKENATVTVLINDCNDNSPQFELPTY  
QGDVKEDVKIGFVLIEATATDSDIGINGMFDFFIVDADENYHFTIVKKSSLEQN  
IALIKVDWRLDREKQNQYTFRIAAKDHGEPPLTGYAQVIINIINDINGPIFVPP  
DFCGKIKEEFKGEQMVTTIEVNDPDDKGSQCPCDFEIVEDPSKMFYLEKTNIN  
NKAIKTTSTSFDRDMPNQQLYVLRVSAADSGSPPLKSFTYVYVEVEDVKDN  
SIIEGLLNIDLNAYNGKFIGGRIGYVYINDYDILLSDHLIVTSGNAVKSKYFT  
IDSSGMISATSLLPLGEHELKIQSTERKVNKTVISKVIVSVKEVTEQATKNSIA  
IRITGMQKNLTCKEIPYPDMAPFLAQLLNVDITQIKIFSAIEVPSLYRGVDIRFY  
VRRFIESETEDYLLPIEIIAKLTPHIHEIEQFVGGQVHSGVDPKAKEPCTVGF  
YNDIFASNQYTIIVTDKNGIIPKPSARIFISMDVHDVAVCVSEIRKVDLCKEGP  
ENPCLNGGTCYPILPSGYRCKCMQGFGLQCQLSTRYFEKDGFFLLKPISYFY  
EGTISFEFSTLDSNGLIFYHGPTISDSNRNKLLDFLAIDLVDGKVGISISQGEE  
KIFRKIVVSGKNLNDGLFHNVNIFKRGKFIQVIIDHCKDFEITDLSPLDNLNQQ  
RDSCEITGTPGRWRFLNGIYPLQIGGAKSYTLGGNVIVFESLKGCVRNIIIDNG  
IMYDLQSPLMQSKSGIGCPSYSTLCPVCINGRCILINSIRKCSFFGWQGENCN  
ERVQAYRYLGNSSYSQYSLLEDEDGLLRKLSWHKRYESHYMLQVKTFYDGVIL  
YEEGSSGEFSLLEIRKGMQLQYKYNLGDGVLTLALPGVNITNNEWHNISLIRKG  
AFATLEVWNNGMISGNTYGSTGTHQLLDTNGIIFGGMLTSDPSKKNSNKNK  
IAVDPIKRIINKDGTVADPNKNNNDGLIADPFQGCITHGSYNHEYLDYRFSDSI  
NPLVKVFRYNVDANCTCSLAEAKLCLNGEVCMAAGSPPYCSCLTGSKCSSTDT  
MKGQENNSRFLTGTGMMVLIVLLLLFLGFLAVLALFTSGVFNKKKPIPIYVD  
QTCRENVMLYADEGAGEDDFHNYDLEKLLQHAGGKNLSVVEDMNSFEMSEI  
NKNGYFIGGSQNDFSNERNNSFIHDSNTRIYNSSNGEAYNATTARSVSNAFNS  
SNNEAYNATTARSVSNAAYNNSSQSAGEMYRATTARSTVTRNQQDQQENRFS  
NQNESESLLRSDYNANTETANFTSRSQRQVSQSSRFDASQAEEINLALFIDEQL  
LAADNSKNSHPRDTLLHYGYEGEGSDMSDLSELGESESETDDEDDFSFLADW  
GPKFEFLDRLYNPRTDDSEEDV

>Nematostella\_vectensis\_Cdh1\_nve\_Cdh1\_e\_8e-30

MSAGRLAAVLTTPLLFLLSLLKTFQLAKAQDTLIEVNFDEGRPARSSVYLFDS  
SGDVFSLYQADPTVPLLFQISEVGHVTSTQEIEYEIGKTNKYDLTVLQRPRGET  
LGGIAITLRITLDVNNFHPVFQLSQGEHYEGFVKEGTAENTIVEGLEQCHATD  
RDTSGIRGYSIISGNEKGYFKVETVQIGSGVTSRKFLVLKTTGKPIVRDDNNPY  
IMLTVQVTDGGNPSHSGTANIRVNVEDANDQTPVFESSQYRETIAENTPIQTS  
VLRVRATDKDDGTNGGIYYMKNPVNSYFTIDAITGVIRVAKTLDYNARDK  
HTLYISARDRGDPPTSAAEATVEISLRENIQGWPLPDSADPKENTKPYFPQSR  
YTFSIREDFPPKGALLVMRAADNDPIGPNKRLRYSLSGNGVSKFAIDPESGVVT  
LTDSVDYENTPNNHVYDLTVTATDQGPGLSATTQLLIEIQVDENKNSPRFD  
PQQAILEISENLKQNSLVTTVSATSDSVGNPSSPDGKVVYSIVGGTGLGVFR  
VDSNTGEVKVAVPSLDREGTSQYTLVVKASDNATFPRSSRLFLMINLLDEDD  
NFPYFSQPIYIAQVPENQPSGTFVTVVVGRDADEGFNPSYTVITPGVPYKIEPST  
GVIRTSKSLDQSELSTRELQVIVRVSTAGSKTADGQVNITVISKVNRPVFKNT  
PYSVKVPEEMGPLPNLFCIAAVDSLSPVQYTLAPGADGLFEVDKDSGRLHT  
KNSFNENVDRYNLRIEARTSSVQEVASASLTVTEEKDLPKFSSDSYQLTV  
DESAAPGTTLAPGLLIIDSSTSSDQFDCSMEAITSLHTLYNFEVTQQSGRCFLR  
VQAGGKLD AHLASKYTFNVRATDRNFRNMFATAQVEVNVIDVNDHKPEFLQ  
ESYWLSVPSSTPAGSSLVTVQAEDMDIGTNAQVRYELLRQENSERFILNDNN  
QLSTASTLTPNVRYQLLIRASDSATRNPSSAQVPVYVSVYSPSESPVFDKSSY  
NQNLPEDSSANTLVFTAKATRS GSSSGITYELVGGYKQIGEAMFSIKPDTGQV  
YLIKKLDFETKSYFPIAVRAKYSGGAIELASEVVAKVITVDVNDNGPRFAFHE  
SSKTVVIDSFS AKDTQLVQARALDADSGSLGEVTYGIDGGRSTSNLFPNINVK  
TGMIFATREILYTQGSSYIIIIVVATDGATDGSQKIQKFTVNVQVLDTPRPSPFPQ  
KTYSAPVTETAGVGDVTTVRAVYSKPNAFLKYTFVSGNEDNTFCVNGFGIIS  
VAKSLDREKVAGYTLGMRVTLGQHVD DTTVYVNLTDINDDAPHFTSAIYRR  
SIKEGLAEDTEILPPVIAVDHDFGSNGKILYSILSGVHPDWDKYFNIDSATGKIT  
TKMTLDYETHKSHTL FIRAEDNGSPKRLSGIAQVDIDVIDRNDNSPVFAAFY  
RAKISLGAVKGT SVLQVHATDLDSGQNGQITYSIIQGN EEEAFTINEQGVILVD  
KSLTTVAADKFS LKVEARDKNASPRSGSVTVEINVYLPDGPPMFVVSPVTVY  
VKEGV PANHRVAGVKAATSEALTYTLLSGNEAGMFRINPSTGSLDATRELDY  
EERRRYELKIEARDTRDRS AMVELIIIIVVNINDNKPTFVDIVDGQIDRKAIGTCS  
PTDIAEGEVITRLGAFDRDGDEITFIVPDDVKDLFKIDSRGVVTAKKPIEDLPKI  
YPFNVKALDNGEPPQETDVKVRLVFVHYRPDQKHVRVNVREDTPTGSVIAT  
VRRYFPNGIVSLLLPEKANFSVRANGDVILLTPLDYESQQFHRMTVREELGNQ

TNDVDVEVVLDVNDNRPIWMERERLARVNTNSRAGAQVYQLEARDEDDG  
SSGLVGYQLKSPSND AKRKRSPQHPFTINPKTRQMEVAGSLKDQRYDL DV  
FAFDYGIPRLTSDTITLNV DGSAAAGQLPPRF SKVSYHFMVSEDAKYLSLVG IIL  
ARSISGARLDYKIVSGNVGDKFIAMGDGRILLNSLLDFERDQTQYNLKV KATE  
QIPDGLDSTVDVKIDVINANDHFPYFDQQLYSVQIPESTAVGVLVQEVTAKDC  
DCLSSCTCSPGFLTYSIEPSKEQGGKFYIDPATGKISVSVALDYEDQRYHLLKV  
YATDKGKKS FQGLCFVNVTLTNVNDNRPTFLKSAYEFRVAEGAATGESLAIV  
VAVDADGDAVTYSKAGGALQFSVDQSTGVITLNSALDPNKNQYTLQVMAK  
DSGGLTSTVSVTFNVADANNVPQFTNCGTVSIRENDPRD TKITQLTATDAD  
RGQNGQITYSIEDASSQTLFSIEPRTGVVRS L TSLDRENKDSYNAIIKAEDGSSK  
QDESERLLWYCYLTINVEDVNDNRPYFLAAKYFGSVFSSAPNGSNILTVQAT  
DADSGSNAKIKYALLDSAGGLFRLDSSGILRTNTNPARLQLETGKKLLLEVSA  
KDVESIAGTQPGKPTKYTTQIEILVSNEEPPKFSQQVYTASINENMETGSTVTRI  
TATSSTGAEISYENVDTNPRAKILFRVQPDGYIITGDRPDYERGT TYNMQFAA  
KDKKTLLYSTVKVVINIIDVNDVSPAFLLAINTRNARVLENKPAPTKVISMKAI  
DDD GSEPHRRVTYEMKDNPNFQIDASTGMITTKTTL DREVTPKYDVEVTAKD  
GVNKESAILYITVVDQNDQPPVFAPKSYAISVPEDSPIGTSVLDIYATDADVGE  
NAKITYFISKGDPEGKFSIVTSPVKGELVVNGKLD FETKSSYTLEVTATDGKFS  
DTAVVTVTIQDVNDLPPVFSSPLYESRIQENTGPGAGVVMVTASDIDSPTISFS  
LDDR GKD YFQITPIRASGPGNVWVGDIRTGSKQLDREESPVKVFTVIANDGK  
HTAQAEIRVNLT DVNDNAPRFPASPYIGYVEENKPSGTSVMYIQA VDDDDPL  
AGGNAKLSYELTDSAGDKFSIDPLSGLIKTKVTFDREQTPNKFKVRVKATDA  
GNPRLSASVDGIIHVSDANDHKPKFTEKFYRGSVAENAPPGYSVLRVTATDE  
DVGPNAEF EFVVVQGNDPHAFYIDPFNGTVLVSGILDY EKKKEYTITLTVADR  
GMPPLQGETAYVVIEILDANDNAPEFIPKIYNASVLEDV GARQPVLTVTA VD  
KDSGPNGNFTFAIDPRSDPDDAFTIEPNPNNASIGIIRTRVPLDQEKTPSFHLKV  
TATDAGGLQGEGERINVIDVNDNGPWFVPPFFV GQIKEGVSARQFVTKLKA  
YDPDAFVKDQVITFSIYNGTVGENFKLDPVSVTNESVDLHSYGVFDREAAPV  
WKIGIEAVDNVGPKPQKNFTYVYVDVLDVNDNAPKDGSL LIIVNAYDGNFTG  
GVIGKPYQDDDFDGDENTYELNSQSPGSYFRVNEGNGDIT AAPMIPMGEYN  
LKIRVTEKKDSPSTVTSSVRVLVRRIDKEAVDNGVA VEFTDMRKVGYFVG DY  
YKGFEDVLASTLGVPTGDIKIFSVQKAHDNGLAVV VFFTVA AKDSYMPHWD  
VVSKLVDAKKPLESLGLKVSRLGMDECSKGNV GQSVGVAKNILVRSSNFSV  
ASGDYGKVPAPASSLTIVSIDILPKCLYEAVFPPEKRCKPHNPCLHGGKCYETV

PDCPGFVCKCPTGYHGPLCEMTRTFYGNYSYIWLPKLMTYSLSDFEFEMTK  
TADGLLVYQGPREGANNGLKDFIAVVLRGGRVELFVSLGLDPVTVKMDKG  
PRLDDGEWHTVQVLRNMKDIEIIIDRCSTALLEHKPDGTVVENRKSCHVYGR  
MLGRSVFLDGFGLQIGGVSNPNMDFPDIPYTGFKGCVRNIKDNHNLVYDLKN  
PLKVVNAPEGCQLASACPECKNDGYCEPLMARDSICVCNPGYSGKHCDGRG  
KASYYLASSFTEYLVAARRRRREVVPPTTEIFNRFYTTLALQVKLDEDATNVV  
VFLASNRMGTEFQRVDVKDSKIRYVLRLLGARMLVLSFPQLNVTGVDVYHSVIV  
RRHGDYAIMQLDYSYVIGSLHSQRTLLDMSGGEIFSGGLPNITIVRIIEAIVEN  
DGSAVISTNVRNDGDGYAADVGGVHVRNLQLSGPLNLVSRKRRASGTVSVL  
GDFGGCIAGTSVNGANMESDPSIKVHRQNVLDGCPCLSNFCANGGTCVDAM  
PPYCICAPGWTGPLCTIVVTAPPVGERGTPFMHPAVIAIILVVMLAIFIIMGAVI  
LKRRPEPVVYADSTDTGHVHDNVRLYHDDGGGEEDNLGYDITKLMKYTYI  
ETTIAPPSVAPSKASEDKISTSSDQPLLQGRPPDAVFGLTGKEPGPKMPKYME  
GDDVGDFFITTRVKITDREVFLAVDELHIYRYEGDDTDVDDLSEIEPDEEDEEY  
EQEFDLQWGPKFDKLAELYEDVDE

>Nematostella\_vectensis\_Cdh3\_nve\_Cdh3\_e\_7.4e-29

MGLDGSASLGFLVLFLLSSLTITGHAQTIESASVPENEPEGFRVFSFSPSPSNEI  
YSFFRALDTASQSALRLFDISEDGVVVTKNPLVYTDGEENLYVLTVLRQRG  
MTEGGIAWTLRITVTDNNTNFQPTFGADLYLGIAEAAQGTTVGGLEKCHAE  
DKDRSGIDRYEIVSGNERGYFVAETKTVGAQKFLVLKATNTRIVRDPARPSIT  
LTVRANDGGGLHGTTRIQIDIQDTNNNPPVFEKSEYTVTVGEDTPVMTSILRV  
RARDADIGRNGGIYYLRNTQDFTIDAITGVIRPIRMLDFQSGQQRTLEV TAR  
DRGSSPKAANVNVQVTIRSDISGYPPVVVPSSSDRNRPPVPEGSSFTLSIRED  
FPVNGAIQVVKANDPDAGSTNGQLRYSLSGNNAIDSTSGVVTLQTQLEYK  
GNPAQDVIDLVVTATDRNGQSGALSASVNLKIEVLDVDDNNNAPVFNPQLE  
LTVSEDSAVGRTIRRVSATDSDDGSDGQVVYSIIQGSGLGVFVQVQATTGDLIV  
AAPLDREKMSFYDLVIKAEDKATFPKSSNLYVMVKIQDVEDDHFQFTQPMY  
YAKAPEKSPENTFVTVVKVVDHDLGESVYSITGASSFKIVPTSLILTTGPIDL  
TTEPSTYELVVTATSTNYGTTKRATGQVNVEITSKTESPPVFKNTPYAVSVPE  
NQGSIANLVCVAAIDTKGQPVIYSIESRGEPPFGIDSKSGRFSLSQSFYETADK  
YRIQISAQSGTAPNIMTSSSDVAITIKDEKDPQFSQSEYKVSVPEDASVRSTLS  
RGIRFVDEDTLSTQLECSMEEMTSRIPLDYLSVVQDGGECKFVIEKTLDTFVA  
SKFTFDMKVTDKNFPGMFATTKVEVTVDNTYTPVFSRTSFWASKPDTLPT  
DTSVMQLSIIDKDMGSLGEVYQLIDPTVSAGETSGYDRFRVDDSGMIESTNI

LTANTLYKLQAKAKDGGSPALETVDVFISVYPSSDTPVRFSSQNPYSASIAEN  
SPLNTEVFRATATKSGSSSGIAYSLVGGQIENGNTMFSIDSSGRVLLLRQLDRE  
RTKSYKLYVRGTYTGGSLTLATDVECLVTVDVNDNTPLFTFDRVNKQFVV  
DNYAPANTIIATLRAVDSDEGANAQVTMSIQGTVPSNAPFTIDTPSNVLKTTT  
KLSTVIDYQITVRATDKGSPQYSETTVIVKVLNIQTPPVFGQAKYTVDVQEN  
TKVGQQVISVKATYGDSNGLLQYSFVSGNLGDAFCIDSSGQITVAQPLDREVL  
PSYTLRVRVALGNNEFDTEVFVSLTDINDDSPTFTKSVYEFFANEDISSGTSIG  
KVAATDRDSGSHGQISYRFLYASDIQSMDFDLQTTGIISLASGKSLDYEDIS  
MHVLFVRAEDNGANKLSAIAEVRIYLRDINDNDPKFSAASYHAKLSLDAPVL  
EHVVQVTATDLDTANNGRIRYSIVAGNQEGAFQVLTDNGLIRVAKSLTTVAA  
SSFLLTLEAADSGDPERKGSVNVQVNVFLPDGPPKFVLDPVIVNATEGIAANQ  
RVAVAKAATSEALKYEILSGNTNDMFAINPSSGVILTTRELDYEEATGYIMNII  
ARDTRDRSASVQVIINVVNINDNEPMFPGETNGQIDRKVAGPFAPGFIAIRLT  
AVDKDIGDRVYYKISIEAENYFTIDERGQLICKNDLKGIA SPFRFTIEARDGGLP  
QKVHTANVLLVFVKYRPKQQPVRVTVPETTRAGTVITRVPYRFPYFTGEFSIVYP  
ENTNFTIDNDGNVTLNRPLDYEEIAFTLITVREKQASGPLENYIDVEITVLDVN  
DNAPVFTMISTLGRVNSNSRAGATAFQLQARDLDSGSNGLIGFQLENIPTLFMI  
NPLTRQIEVGGPRLQTSRYGLDIIPFDYKGPSVNGTKATVDIETVQSPPVFNES  
SYTFTVSERAPMTKIGDVTAVSVSGARLSYTHIEGNTGDKFLAKDNGDIVLN  
SLLDFERDQSVFNLKVEAKEQIPKGLSSEVDVTITVINANDFHPYFDDPVYRL  
KVPESRGVGDVIMTVTARDCDCPSDCTCQVGQLKYSVEAGTSFDIDQTGAIV  
VARTLDYETSKVQVLKVMASDQGEKVFTA VTFVVVTLEDTNDNAPVFKRND  
YLFRTADASTGSMIGAVIARDQDQDDIEKVRYSVVSGTEFNVNTETGVLTV  
AKDLSTGAKSEYSMEIRATDSTKSNDARVRVNVEYKNMYRPEFTKCGKATIQ  
ENLLKGQLIATVTATDRDQGRNGEVEYKIVPVGGQDFFTINNKTEVITSSSL  
DRETKATYTVIIAEDGGHGKDP AERLMSYCFLEVEVQDVNDNYPSFITRAY  
LGSIQNTKPIGTSVLTVSATDPDAGDNAKITYAFKSPNDKFEIDSTSGDIRTKV  
ALTGTKDVNEKMTVVASNTEAIQGGDANNRDRETEVTIYITDLAPPVCDKNL  
FTARILESLSVNSDVLKVSAQAPGGKSIVYSPVKANADIDEKFSVETNGQIKTA  
SQLDYEQLSPGDKTFKLQVRAQEENTNLYSTCSVAITLEDVNDDKPTFDLGN  
YDARVRENAPIGTTVITIKATDRDTGDAGVVITYFLKAGSDEHFAIDVNSGTLT  
TKKSFDRREGQSLFSVIVIARDKGNNPGALSEEVAVKVLVVDENDSPPQFDQAE  
FQTSVSESATIGTSILEVVATDQDIGDNAKLEYFISGGDGRFWFAVQTISKSGR  
TYGEVQVDARLDFETKSSYTIDVTATDGRFSATTRVLITITDANDIVPMFMTL



TTPTLLSPIYTGRVSEMTGSGVEVLKVYAVDTDSPNIQYTLEGSSSYFTIAARQ  
EGGKFGIISTGSQPLDREATPIFSFNVLAKDGVHTGSA YIEINVT DINDNQPRF  
PNSLYVGYVEENKAAGTSVMYVQA HDDDDPYLGGNAEIRYTLTDNAGGKF  
KIDANTALVTTEEILDRETSPNSFTITVLATDQGANKLSTTKVATIYVTDANDH  
APVFTKRIFRGTVSEDRVPGYVVTSVSATD TDTGPNAELEFVVTHGNEPAAFY  
VDPSKGTVHVSGILNYTLRKSYNLTVTVSDRGMPVLSDNSPAYVLITITDAND  
NAPIFIPNQYNKTVAEDLAVGSPVVVTAVDYDSGDNAKFVFDITGGNPDDL  
FEVVPNPDNSSLGIVRTRLPLDRETTPIHHLEITAKDTGGLTGKAHVWLTLLD  
VNDNGPWFQPPFFVGKIKENVNVKQFVTKVSANDPDTKNNGAPFTYAIYNG  
TVSGNFAFDIATITNVTTDMSSSGTFDRETMTTWTIGIAGTDSGRPAKSNFTY  
VYVDVQDDNDNEPCDGRMTIIVNSYNGKFRGGPIAKTYR DADYDGDVNTY  
TLQSQTGGNFFTVDTTTGEISAAKDIPVGEYSLVISVTEVNTGNPPRANEVNF  
KTVTSRATVIVRDITSKAVSNSVALQISDMRKVEYFVGDYHDVVVGELSRMF  
GVSSSGIEVFSVQPSPIKVMALDVQFAVKTGSDEYTKPYDVIRVVTDNRERLT  
NLGLKVT SIGIDMCALERERVGKCINVVETSSAYKIASGDY GKV P APASSITLV  
SMDVVLRDKYVTIIEPGKNC SNENPCLNGGTCHDTVPAGWRVCQCPRGYRG  
PHCEQTTRTFRGTSYIWLPKLTA YDIRELSFEFTTEFKDGLMLYQGPKPGDN  
NGAKDFLAVFLDEGHLVVRVSLGYEPITINMTRRPNLNDKEWHTVQIIRDVID  
RKMIRVIIDRCQSAQIVEENGRVFEKRD TCEITGRVKGRSVYLNFGPLQIGG  
VETDLTFIGITTTGFRGCIRNIIDTEKMYDLRNPIKV VNAPEGCTLAGTCPNNC  
NDKGYCEPSLMAGKSMCVCDLGYTGRACNDRSEANYYLENSFSQFLLTGIR  
ARRELIQPPVPLMNEY YTHINLQVKLDPGTKDCVLFSSNSLGTEFNRLDVKD  
HMLRYIFRLGDRMKVLSIPQYNISDGKYH SVMVNREGNYAEMQIDYRAKMA  
GTTGGVQKLLNMGGGSIFTGGLPNITEVRVVEAIVQSGGDVILRTEDGKVLTS  
GIGVGGGMSFGAGSSVTLITIGSGVLTQRNILDSQSLFVRGIYKNGTVLYGSSS  
SSTFGMNVDDQGIPFKSSDTSSNGNGGVQISQGNPMTY GAGIQWTLSPGRT  
QVGAGNSGGAVEVIGDMEGCTATNRFQGV SLEDSPDVEVRRQNVRKGCPCA  
EGFCENGGTCVDGTPPYCLCSPGWTGPTCVLIVTAPNPGQRPGSRVVS PFVIA  
CVAVVLLAVMVIMGAVLLKKRTPPPVIPVMVEDGHVHDNIRPYHDEGAGEE  
DNFGYDITQLMKYTYVEGGGYGGGGGGYGGGGGGYGDGTGGA AFGSAYA  
ADGGGKGLGSGVEEVMVAEEKPLLQGAMEGYGQQHGIIITITRRRMMNADS  
VDVGNFINSRVGEADREYILSYDALHIYRYEGDDSDIDDLSELGSDDEGGDDA  
EQSFDFLQDWGRKFENLNKIYNLDD

>Stylophora\_pistillata.1\_spi\_PFX34962.1\_e\_2.2e-27

MRDISVIVYSILCYFCLLHTAIGQGFDVTVNLEEGKDAGQPVHTFPLPASNEV  
YTFPFAQDADSKAALTLFQISEQGVVTTTKPIDFEIGKKNNYDLVAVRRDRGD  
KEGGVPLSIRIFITDTNNGFPTFPSNLYHGRVKEDSPVDTIVLGLENCFAEDRD  
KEGSISYSISGGNEKGYFKAERRILSNINRVFLVLKTTNIRIERDVNTPEIILTVR  
AFDGRRFGTTKVSITVLDVNNNDPKFDKDSYATATINEDTPLMTSVLRVRATD  
ADVGTNGGIYYYISGGSPWFSDAITGVMKVVGRLPNQAAVQLQVTAQDRG  
RDSTRHTADVEVNINLIADYPPADTANPGANTPPVFPEGSYSANVREDFPVG  
AVVLVIHAVDRDPPGRNSRIRYRLSGDNAFQINQNGVVSRLRTNLDYSIKSSY  
DLNVNAEDEAQSPLSATASLKITVQQVDKNRFAPEFQAPNKYQRQASIPENR  
AINTKVGSSIIATDSDGSQRPEGQVMYSIASGSLPYFKINENTGDLRSVAVLE  
REKQPQYNLLIEARDKSLYPLKSNLYMVITVTGVEDNFPDFSQPVYEAEPGN  
APKGTFTVAIHAIDQDGDVTYSIDNAGSAFTIQTDSGVITTARPLDPANEERN  
FVLSVRATATNKDSLQVIVDVVSEADSPPTFVNLPYRATVPENLGQIDSLC  
LAAKDSQGKPVYTSIASDTDGKFSVEQDSGRFSATGSFDYEAFTEGVYKVQA  
SSGPQQIATESVTITVTDTKDPPKFSKSSYKFFIDEDTSAGTTITITNRDGSSGGL  
VIEDADTTITNFECTIENIQSLAIENHFTIKLVTSNNNKNGECKLITQSSFDHFDT  
PKFTFEVRATDKNYRNMYSASAQVEVEIRDKNNNAPVFSQQSYWASVDKNFP  
VRNSILKVTATDKDSGSFGEVYQISRDTQDRNRFLDSNTGVLSSASSLAEK  
TYNLLIEASDRAQENNNIRKTRVSVQVYAPGTTYIQFDPASYSKDIAESAARD  
TNVFKVTAKGPNSIRYSIVGGNINNAFKISQSGQVQVANS�DRETQATYKLV  
RANKDGTKLASEVTTTINVLDVNDFTPKITFMETEPKNLAVEDYSPKGSFVVK  
VTAIDRDAGANGQVKYSITTSNTPFQIDQNTGVITASREIRRSEQQVWTVRVQ  
ARDSKGLQSFYNLRFVTEGLQAPQLSPTIPVSLDENKPVGFKVKDISPTTPNN  
NYKYNILGGNTDEAFCINHGDVISVARPLDREKISSYSLKVSVSVGNKVSNTS  
VDVTIRDKNDDAPRFTKAVYSFDVSEDRGFAQEVGKVSÆDKDTGDNGEVE  
YRLLYTVNVNSKFNVDPKTGSISTIDAPVGSSPSARPLDFEQIKQHVLVIRAAD  
NGIPSLSTIAKVMFNIKDVNDQTPKFSADSYVSKVALDAKVDSQVLLVVATD  
LDSGDNGKVVYNITGGNEEEAFKIDPDTGVIKVKKSLTTVSASTFTLDVEAKD  
KGNPPRSTIAKVDLNVFLPDGPPKFVVKPVVQEVTEGIKANNRVIVVKAATSE  
ALTYEVVSGNEDGLFRINPSTGEIMVTRELDYEEARERKLVVRVMDTRDRSD  
QVTVIFQIKNINDNAPTFPGEVDGYVERKVEDDFQVGDPVARLSAFDGDVGD  
KITYTISENARASFSIDKEGFLIAKKPRKEFPSPVKFNLTAKDNNGSPRESKVN  
VQLVLVSYRPEQQQPVREYVREDKEVGSVVAIVPRYFPGSTLSIIPRKANFT  
VDDSGRVRMTRPFDPEARQFYTLTVREQEPAPLSRTNDVDVEINVIDINDNKP

VMKMVEFFGRVNTNSRPGTSAYQLKAEDKDGGLSGRIGYQMVSARGIPFAINP  
LTEVVETGGILEDRGGYNVTVFGDFGVPRQFGDSVYLDIKTVNFKPQFSESS  
YNFEVFENDLPGKVIGVVNATSASGARLGF SIVQGD TDNKFSIESTGELIVNSR  
LDREKTSMYNLKVRTTEQIPRGDSNDVDVRISVKNANEYYPFFPLKVYEK SIN  
EDVGSGASVLSVTAYDCDCTGCACKNAELKYSLEGTNVFKIDEVTGLISVGD  
TPLDFETQRRHLFKVVVEDFGEKKFSSRSYVRVTVQNKNDDEE PKFQRGEYSID  
IAEDAATNKALAA ILARDVDGDSSLYSITSGASSIFNIDGNTGVLSLAQSVRGQ  
KKQYTLTVRATDTAPNPKYDEV RVVINIEDINDNRPVFTVCPNEVTVEENKPT  
GERVIQVTAKSDNGRNGEVEYKLV TGGERLFEINNSTGLITTITSLDRETAD  
RHTLIVQAEDGGHGRNEAERLLSYCIEVKVADVNDNYPVFFTRQYYG SVFH  
KAPISTTVLTVSATDDDIGNNQKV VYSLVGSNDKFEVDGTTGSIRTI AVL SNFE  
QTVQLKIRASNQATPTAPKTSSSETTVEINVVNKQPPKFEPSSVYTA EI QEDVE  
VGTPVVTVKAESQVNSTNVIAYSLVKSYP SAEQNFKVDPGTGVISTASTLNFE  
QQSSYTLQIRARENENDLYATCSVDIKLKDVND DTPFKLEEYSARVPEETAG  
GFNAITVKADDRDTGLFGQVLYSLDASQKFRIVASNGTIFSREKFDREAEKTH  
TVFATATDGGTPPLQAKVVVS VVVVDQND EPPVFEKRKYTG NVQEDAPIGTS  
ILDLSATDADIGDNARLEYFISGGGQS QLFRMETVYSPENKGILYLEGK LDFES  
KSTYTIKVTATDRKSDTVDVVITVINTNDNAPEFTALIYEETIQEETKAGEKV  
AQVSATSDSPGIKDTLVYSIDKTGQRYFSINSGTGEITTANEKLDREKDQTVS  
FYVFA YD GKHRGEALVRVNLTDINDNAPYFPNPPYVGSVEENKNP GTSVMV  
LQAVDLDTGVNAIIHYELEDNAGGKFKIDQDTGLVTTLET LEREGPENEFTIR  
VRATNRQAGAPLLSGT VTATIKVSDGNDQSPVFDPLVYKADV PEDALPGYLV  
TKVAATDKDVGPNAELEYTITAGNDPYEFYIDPRNGRILVSGLLDFDKGKKT  
YNLTVTVSDRGNPPKSAPRPALVYINVL DANDNPPIFVPAEYNKKVSESVKPG  
DTVLLVTAVDKDTGTNAQFQFSITDGD DANMF AVRSNVNNGSIGEIYTLLQL  
DRETVPRYNLTVAA TDSGGLQGI AVVHLTITDINDNGPWFKPRYYEGTVQAG  
INPSQQQPVVILEAYDPDEASNGPPFTFSLVDADLSSRFKITKATDKTANMAA  
FGEFNREVKQVWEVKVKAIDSGIPAKDNTTFAYIDVEDDRNRNEPFDGKLTII  
VNAYNGRFAGGIIGKAYYRDDD YNGDQNKYSMDDQKFFTLTPETGDITAEA  
NIPEGRYTFSVKVEETKQRPGNFPKIVTSDVTVIVQSVTNAAIQQSVAVLILEM  
RKTSFFVADFYTKVQGVLANIL TGGDTRILIYSIQKAPVNRVPLADLFGVEIY  
LSVKLSSGGIMDRLQVVNQLIQKKERLEGLGLVIGSIGIDACAYEQQV GICR  
NVVKAASAFTVVS GDY GQIPATQSSLTVVAINVNLQAEYTSIILPDKNCTTSTP  
CFHGGTCHNAV PKGIICECGRDFRGPECQSTTRTFKGN SYLWLEKLTAYERST

VSLQFMTGTADGLLLYQGPVSEGSNNGLPDVMAVMMVEGYIKLVLTGPHP  
NAPLELYMNRGDRLDDRQWHTVEVIRELKKVTVRIDLCSKAQVTEDDGQVV  
ENRASCEIEGEVWGSNIYLNFGPLQIGGVENKLNDAKISYAGFQGCIRNIKD  
NNVMYDLLNPPFEKNTLGGCKLENNPCPCDNDQGYCEPLWTNSICVCDLGF  
GPNCNSRTNANWYKPNSTQYRIRQTARKRRELVPPPVSMSNEFFTNIALQVR  
ISPNSSNVVFLASNSLGTEFNRIDVKNHVLRYIFRLGDRMKILSIPQLNITDDK  
YHTIVVKREGNQAKLQIDYDGKVEGTTGGIHKLLNMGGGSFFTGGLPNVTEV  
RVVEAFVNSGGNAILRTADGNISSGIGSGLAGYSSSDADLMGTMITVGRAGQ  
VRLSSSYMKLYSSFGMRAVVGSSGRVFGRTATTSTRTIIRSYGSYTPIGVKS  
GGKVNVRVIPTNYNPSGGSIVVSSTKGGSAVSSGGSGSAGGGSGASGGGGS  
ASGEGGVVVGSGGVVGGGSVGRGIGGQYVTGATVLGGASSADAYGQVNA  
YGTSLVGWTLGATPDGAKEVEVIGDFGGCTASNNYNGVDLDNDPGIEARR  
QNVEFGCPCSSGLCLHGGTCVDAVPPYCMCPPGWTGPRCETVVTSPNPGTRP  
GSKWANPAVIAIVLVLLAILAIVGAVLLKRRPVPVAVVEDGHVHDNIRP  
YHDEGAGEEDNFGYDITLMKYTYVENGIAGTGGAGYGKFKDAGGIGEEEF  
TVAENKPLLQGAMPGTGLQHGVTTLTKRRVHPESIDVKQFIDTRVHEADGE  
YILSIDELHIYRYEGDSDVDLSELGDSDEEPDEEEEQEFAFLQEWWGKKFDN  
LNRIFNEDD

>Stylophora\_pistillata.2\_spi\_PFX20816.1\_e\_2.6e-13

MYDSQRTCILRNACQFKTERLRFYVAILWTACVFGLHRCSVSASITNYNNFN  
VTEGLPKGTFVGSIANQQYDNLHVYPHDDLILDPISKNITTKIVLDREKISVYII  
DLIQNPFEIISIFINVTDINDNIPTFPMMSGYDFKIFYEGNPVVVRVRAADDDLGS  
YAVQNYISVSGNTDNMFVLTEYIDTVGRLRAKIELQPGKQLDREQRDFYSLT  
VSAADGGTPPQTGFGLVNITVLDLNDNDPVFNPKKYKANITENSKAFTPIVEV  
YATDKDIGRYGKVEYAIHDS SSPDSHFILQTTERGLILNHAILDREKQDSYS  
VRVLAHNPGLLGYKQDSAYVTINVL DENDNSPEVTYTFYLD DAYQVYEDA  
SVGTEVARVWVTDKDAGKNGEIESVTIQGGNGHLRIAYDAQNKVNIISLAKE  
LDREKQPAFPVYIYAKDKGDPQQTQDGFILNVGDINDNPPKFDQDVFI VVS  
ENATIGTSVVVAHATDKDIRLNAKLVYNISYTPQAAPYKTFWQIDQATGEIRT  
GARLDREKFPRLFVTVTDSGVPLGANCTVIVNITDANDNNPVFTKAVYSS  
TVNENSANNTSVVQVLANDIDSGINGIVHYSLETQHRRVPFSINPNTGLLSTSG  
QIDFEAQSLYMFNVVASDGGGRFDKSILNISVVDENDNYPVINPTTYDVSVE  
NLTIDDVIATVMAKDNDSGILSQLNFAFSNRNNDGLFFINSSTGIITLIKPLDRE  
TKDFHRLEVQATDGGGLKSKNSAVIQVTVLDVNDEPPVFEPSSYKFTIYENS

VNTLLGSVYASSKDLGTNADIYYSSISGGDIYNVFTINSTGTIFTQNNIDHERSPQ  
LLLTIQAKDGGTPPLYGFANVSVAVNDLNDNAPSFESSVIDVNILEDTKVGEV  
FYNVTAQDPDSGLFGRVRYTFLSNPNSTFQVNSSTGALTVTHSIDFEGPRLYFI  
KVLAEDGGSPPLNSTATFRVTVVDVNDHTPKFSNTSYSTHVDELTSAGTNILN  
VSATDADSGNARISYSFQSGVDTSMFGLRSNGWLYITRQLDREQQEVYRFT  
VVATDKGHIPKSSTADV VVYVDDINDNNPKFTQQSYIFSVDENQPNRTFVGQ  
VPASDKDAGANAKISYTFEPPSLEFAIDHNTGIIRTNQVLNREQRSSYTLTVKA  
NDHGASPRTGHASVTVTVQDINDNAPTFFKKPFYEKTVSEDI PVNSPVLTV EAS  
DPDAGSNGMITYFFASNPGVFTIDARTGVITTTARLDREKHDRYTLSIGAKDH  
GNPNQSHVVVFTIHLVDVNDNPPRFVNN SIFVNIPEKQAIGTVVTTVTAKDKD  
TGNNGKVR YTIDQGNGGKVF EINETSGVITLRKLLDFEKKSKYQLRIVAR DRG  
QNSQSSFLYVTVYVLDSNDNRPTFEMNPVTVQLREGVPLNSNVTTIKAHDYD  
SGQNSWIRYSIDSQSPGPAKFKVDPSTGVVQTIGRIDREAVDEYTLNIRATDQ  
AFTESERLSSTLTIFIIVSDVNDNKPIFVSPNETFVMEDEGFRYPITITAIDDDL G  
SNGKVKYKIEHDENGDSFKKFALNADTGLLELLGTL DHETMPKYVLNISVTD  
GGTPPQSSFQLLTVFVVDVNDNAPEFNQSLFLGNVSENQPVGTPVMAVSA YD  
LDSENGALTY SIPRGNVNQKFAINGSSGVIYTHSTLDREKDEYTLTVYAMD  
NVYPRRVGTCTVKIKVLDVNDHRPIFIPSRLNLTVLEHSPPFDFHTLRAQDPDI  
GQNGRLRYIIQHGNEDAKFSVGEFTGVLSTTAGLDRESKSR YDLVIEARNVV  
VPFYNASIYVTIFVGDKN DNSPKFVNSSYSVNIRELTKIGTSILRVQATDSDSG  
KNGEIAFSL SNEALGIFRIDSKTGTLYTLQEFDYDIKAVYNFLCRATDKGV APR  
ETSVGVTVSII DENNHAPVFDVIPYEATISSGSSPPQNGLVTVRAKDKDSISITH  
MTYRLANSSHPFFQLESNSGVVRVKQGVSSIPDKVYVLNIIADDGGNLTGRGI  
VEITVGSVSPNQPMFVNNTPAFVSLPENSPKSREVARVLANRSNDVVYSIVDG  
NSGNAFLINSQTGIVTVQNPAQLDFERLRDFRLRIIVSRKSQPSRNDYLTLYVN  
LTDVNDNKPVFYPANISVQLLEDDGLQSSSFTSR SVASLTTTDKDSGKNQEV T  
YKIIFGNVDDKFGIDAQLGVLTTKGFLDREKHAVYDLVVNATDKGTPSRSSV  
SHVVVNIVD VNDNIPAFSGPYLVDVKEDLRVGS LVKR VVATDKDKHPKLMY  
SFGNDKTSYDVFRIDQLTGDITLLES LDYERNTSYELNVTCS DGRYKSHTT VT  
VNVKDVNDNAPKFLESSYQATLSEETAQGTSILKVS AEDRDDGSNRELTYAF  
VTSLDVFRLNATSGVIYTAKKIETS NRDSL YFVVVSATDRGVPQQRAFVTVQI  
RINRKPIFKEPVYRASIAEGTSPGTTVLT VSAADDSGMNVAKISYKFKFGNSEG  
LFRIGLRNGIIKVNKFGLDYESEKNYLMGVEALDESTNNSVVVEVNITITDVN  
DNPPVFDPT EYVKEVYENISIGTTILRVNATDKDSGTNGRLVFSILSGNDKQSF

RINSRTGEIVTIKSLDHESIKEHMLSIQASDEGSKPETMLASVRIKVGDVNDNK  
PEFHILHPEEVGVEENSPVGTLYELIARDRDSGNNKVVVYSIIGGSGQGLFIID  
SGSGELRTNATFDYEARNLYWLLVKAVDKGGKPLDNTVNLTVNIKSMDEFEP  
IFENSSYEFEEVPGNAKIGYVVGQVAASDEDGGEDGRLRYSFDFVSEDGFAIN  
ETTGIIFVNKSLSEVSSKRRKRKSVEETDDVSIERRRVRREIDVTKVKLRVQAD  
SGQPKSFKGLASVEFGIDFACAGCASTGQRGNGDDEGISKNTYIIIGLAILVVI  
LIAFIVMAAILRKRKNKRGRQHPPLRYDGSFDEITVYSAPNGNINHVDSSIEN  
VSTPRGVSQEGSPLNGPSDSPACGTDSSDTPNSASSGRGSSEGVDVFEDRRHPVI  
VNGDIGSLHSENYVKTVVGPDGSIQQDSDQVSQLTISDASSMMQGEGLTIDK  
HSDKIEKLLARLGSQESLHVFGEEGGGEADGGVDVSNLLYAKLAEVDADED  
ESIIDGMRPFVEEGHDHPSYGGSLSSIVGSREELTGSYNWDYLLDWGPQFQPL  
ADVFLIEIGMKMKDDAPPKKTLSLSLSPSRDSRNPQAGVTTDMLSSVSSLRPSPI  
SPPSTRYTSPAFAFNFTPAITPLVTRSPSVSPLDTGASTPAFSPTGTTPKSGSRPS  
SMHVPVLHLRRDSDHSGNSDLTHSPSISDNESNLEIDV

>Branchiostoma\_floridae.2\_Bf\_Cdh

MANRRALFPLTAGERTAALVISLFVFLASAASKDDVRTFGIPPQFSVFVPHDV  
EPGYTVGRLVRPAFVSPHCEGARLFSVDIRTGEVTTRKSLAGHKDESVS LAVS  
WPDGSRETDILYISVMDRQKLPTIPSDFHVGAIGENLPPGTAVGGLGNLWVHS  
PAMGEHFPAAHNFTYHLISDIDLPTLGHHATKEGETVEIYTTKMLDRETQG  
EYDMTIVTVSLGTEDENSGSKVWAWGWNSVARALIHVTVADDNDNPPVFTN  
EQYEAELATTDRKPVVQVHAVDPDNGNNAVTVVYSLSPSPVPGFTIVPKTGQI  
WTTGSAHLGTQNRHHLVIHARDSGDPSLVSQPASIIQVVKSGDESIDDKSME  
KSRSKRRALPNIQVSMAENAEVSSPILDVNNQPSDPVNDQFTIYPEPSRRRVTI  
DGSTGVVRVVGKLLDREEQEWENTVEITNPYRQTNRVNVNIRLTDLNDNSPQ  
WTMVPFPYQAVVPVNAPRGTLVYQLTAEDKDLGENAEFQFFLES DGDGRFE  
LDTSTGDVTTSGLPFTANQEYIVHGRARDTGRNESPQAVVSIIAGNRPPQFMQ  
QTYDVTVPPEETLDQYPVQVEAMSFGRSISYSLKSSMDMFAINRLNGQITLH  
RGIDYETEQRQYTLSVEATETGVNPMSSIVQVRVTVADINDCTPEFANPIYSQ  
RDVVENIPSTKAILQVSASDCSDENQRITYSVDDDAHFRIASDGTIYPNSQLD  
YEVNPNMYEFLVKAVDHGTPLVLTGSATVRVRMANINDEPPVFSQRTYTTFFV  
AEDAEPGGLVATVHATDMDGDGITYAITGGNDGTFVIDAKDGIIRLSDNPSLQ  
GSHYTLNVTATDDNASGGPGSLTGTAVVVVGINDINNNKPDFTQCAEYVPSV  
PEGQPSGTFVIQVTASDADQGSNGRVTYSIHREDSETMFNIDADSGEISTAV  
VFDREERREHAVTVTATDNADNPLIGVCQLIVHITDVNDNDPVFENNKYAAV



LSENTALHTSFLRVAAQDADMGTNAEILYSLSEEVPQYLGIDRQTGWLYVKS  
AISQTQRIIRRVIA TDGGGRSTSVRLDVAITDVENEPPMWEREYPAVTIPENTPI  
DQVVATVKASSTLLDSRITYSLVDGQLPETNKPKRFYLRTNRATRTADICVFH  
PLDFETTPRFELKIRAENAARIPLAAYTIVEIRLTDVNDEVPDFTA KSYAMSV  
EQSPKGTLVGQVTA VDADTGDAGKVTYSSPDPDPSLRDWEKFRIDPSTGEVF  
TKDMFDREKKS FYLLEVKAEDGAVSDRVELSNVNIPNSREAYVRISISDVNDN  
SPTFPRTQYEASVDEDKDVGYSVVTLTANDEDEGANAKLRYQIT TGNVGGVF  
DVVPEIGTIVVAAPLDFEAVQEYELQLVASDGKNENTTKVNIKVNNINDEEPE  
FTRNEYTGSIREEDSNTPIPILOFYDVSQVTARDPDRGASDADIRYSLQGQGAN  
DEFSINIITGQIYASKSLDREERAVWRFIALATDEKGRGLVGFSDVAISLGDIND  
NAPEFNDEPYVGSVLENTAAGTSVMTVTATDADDPDVGRNAKLYRITKNA  
KQNRVNLFRIDRNTGKIFTTVGNLDRETTKEYTLVVRAEDGDGLWGTGTVT  
VQVGDINDNPPAFNQRIYSTTMSEGLGKDGIVTTVAASDADVGDNARLFYSI  
VGGNRNNQFRMDNSDNKGIVRVNRRVDYEEPTQRKFNL TLEVRDLDFTSRG  
YCVINVL DYNDNPPVFNPVYYEKEIYENATVGTLLRILSATDRDTGNNAVFK  
YSINPSSDPDQQLIGAQN GILTVNKALDRETL PQHRLTIQATDIGPPSLVGNA  
TFVVNLLDINDNGPVFKEDYRPAIPENTEGPLHVQLIEAVDYDSDPPNGRPFV  
YAVDPNPLARAFDFKDN GDDTAVVTTKRSFDRETQELYELLVIIWDSGQPQ  
MSATNTLTVTIANENDNPHYGGTKEVTVYNFKGAMPD SPIGIVHAPDRDDGA  
LVNPDVKTYIFESTEPKYFWLNESSGMAYIREKTPAGRHTFSVRVSDGIWPDA  
VSSLVNVKEVTEEQLVNSGSIRFDGTTAEFITPGKDGQSKYDLFRQAIKAV  
VGAQVQNV DIFSVLNVPSRRSVDVRYTAHGSPVYPAHKLNGLAAQNRQTLE  
ELVGLTVAEVNVDPCVQEICQTGGCSSRLETSDTPTLVNSGSASFVSVTATMV  
HECTCPQRAEVRGLCDSSPCYNGGTCINTPTGYRCKCRNGYDGIDCQQTKRS  
FRANGFAWFDPLPQCLDTRISLEFITKHPDGLLLYTGPVAPLATGEPRDFMAV  
ELVSGKPRLTINLGDGPLQLDIAVTTTVNDKKWHRLDIIRQGSTTRFMLDRCK  
NSVITETVGTGRG TSAEDRTGCEAIGRVPGKSRFLNVLSPLQLGGIAQKSLPYP  
TLTNLDFQGCIQNLVQDTKVIDLAE AQLSQNSEEGCTQTDANCQPNSFTPICG  
PNGTCVGTWDSFYCTCHPGFHGDRCQQATPEYSFDSESWIRYQLRRPVSARN  
TQHQLMFRTRVPNGLLTAAASRDRQEFTSLELMNGKVQYRFNIGNGVHIVRL  
EDFTVDDGEWHVVNVERFGNEVSLKLDGGGGQREITIALGSHREILIDQNSVL  
VGANVTRAAEEQNVYNDFIGCINDIRLNEEYLPMEGENAVAMATTEGIQPGC  
WDHEECLSAPCVIPFVFLVLACVMYKKQLKAATTKYLAVDGHDDVRENIISY  
NDEGGGEEDQESYDIRKLQKPDRESPTRSKRPLEPRIYVPPDDVPQMRPTLPQ

GDNPDVADFIGARLHDADNDPTAPPHDSIQPYDYEGQGSTAGSLSSLTSASSE  
DDQDYEYLDNWGPQFRNLADMYSGAGGGASA

>Mus\_musculus\_Dsg3-203\_desmoglein 3 [Source:MGI Symbol;Acc:MGI:99499]  
MTCLFPRALGSLALLMVVLLVQGELHVKPGGQHREDGTALQLAKRRYKRE  
WVKFAKPCREREDNSRRNPIAKITSDFQKNQKITYRISGVGIDQPPFGIFVVDP  
NNGDINITAIVDREETPSFLITCRALNALGQDVERPLILTVKILDVNDNPPIFSQ  
TIFKGEIEENSASNSLVMILNATDADEPNHMNSKIAFKIVSQEPAGMSMFLISR  
NTGEVRTLTSSLDREQISSYHLVMSGADNDGTGLSTQCECSIKIKDVNDNFPV  
LRESQYSARIEENTLNAELLRFQVTDWDEEYTDNWLAVYFFTSGNEGNWFEI  
ETDPRTNEGILKVVKALDYEQVQSMQFSIAVRNKAEFHQSVISQYRVQSTPVT  
IQVIDVREGISFRPPSKTFTVQRGVSTNKL VGYILGTYQATDEDTGKAASSVR  
YVLGRNDGGLLVIDSKTAQIKFVKNIDRDSTFIVNKTISAEVLIDENTGKTST  
GTIYVEVPSFNENCPSVVLEKKDICTSSPSVTL SVRTLDRGKYTGPLYTVSLEEQ  
PLKLPVMWTITTLNATSALLQAQQQVSPGVYNVPVIVKDNQDGLCDTPESLT  
LTVQCDDRSMCRAPIPSREPNTYGESSWRLGPAAIGLILLGMLLLAPLLLL  
TCDCGSGPIGGAATGGFIPVPDGSEGTHQWGIEGAQPEDKEITNICVPPVTTN  
GADFMESSEVCTNTYAGGT MVEGASGMEMITKLGATGATAALGPCSLGYS  
GTMRTRHSTGGTLKDYAAPVNMTFLGSYFSQKSLAYAEEDEREVNDCLLIY  
DDEGEDAAPHSP TLSSCSIFADDLDDNFLDSLGPKFKLAEICLGIDDEAKQA  
KPGPKDSGSGADTCARSMEVPQSGSNRQYL FLLLPSNEEAGARIHRAPSTNPR  
LLLLCLVHSEQRSVHSQYGSDAQMNTL

>Mus\_musculus\_Dsg3-201\_desmoglein 3 [Source:MGI Symbol;Acc:MGI:99499]  
MTCLFPRALGSLALLMVVLLVQGELHVKPGGQHREDGTALQLAKRRYKRE  
WVKFAKPCREREDNSRRNPIAKITSDFQKNQKITYRISGVGIDQPPFGIFVVDP  
NNGDINITAIVDREETPSFLITCRALNALGQDVERPLILTVKILDVNDNPPIFSQ  
TIFKGEIEENSASNSLVMILNATDADEPNHMNSKIAFKIVSQEPAGMSMFLISR  
NTGEVRTLTSSLDREQISSYHLVMSGADNDGTGLSTQCECSIKIKDVNDNFPV  
LRESQYSARIEENTLNAELLRFQVTDWDEEYTDNWLAVYFFTSGNEGNWFEI  
ETDPRTNEGILKVVKALDYEQVQSMQFSIAVRNKAEFHQSVISQYRVQSTPVT  
IQVIDVREGISFRPPSKTFTVQRGVSTNKL VGYILGTYQATDEDTGKAASSVR  
YVLGRNDGGLLVIDSKTAQIKFVKNIDRDSTFIVNKTISAEVLIDENTGKTST  
GTIYVEVPSFNENCPSVVLEKKDICTSSPSVTL SVRTLDRGKYTGPLYTVSLEEQ  
PLKLPVMWTITTLNATSALLQAQQQVSPGVYNVPVIVKDNQDGLCDTPESLT  
LTVQCDDRSMCRAPIPSREPNTYGESSWRLGPAAIGLILLGMLLLAPLLLL

TCDCGSGPIGGAATGGFIPVPDGSEGTHQWGIEGAQPEDKEITNICVPPVTTN  
GADFMESSEVCTNTYAGGTMVEGASGMEMITKLGATGATAALGPCSLGYS  
GTMRTRHSTGGTLKDYAAPVNMFLGSYFSQKSLAYAEEDEREVNDCLLIY  
DDEGEDAAPHSP TLSSCSIFADDLDDNFLDSLGP KFKKLAEICLGIDDEAKQA  
KPGPKDSGSGADTCARSMEVPQSGSNRYQTLPGSLEVTQTGSKICHTLSGNQ  
ETSVMSTSGSVHPAVAIPDPLQLGNYLLTETYSTSGSFAQPTTVTFDPHVTQN  
VTVTERVICPLPSASSSIVAPTELGRSYNMLYTKETCSHL

>Mus\_musculus\_Dsg4\_desmoglein 4 [Source:MGI Symbol;Acc:MGI:2661061]

MDWLLFRNICLLILFMVVLGVNSEFIVEVKELDIENGTTTWQTVRRQKREWI  
KFAAACREGEDNSKRNP IARIRSDCEVSQRITYRISGAGIDRPPYGVFTINPRTG  
EINITSVVDREITPLFLIHCALNSRGEDLERPLELRVKVMDVNDNPPVFTQNV  
YTANIEENS DANALVVKLSATDADEDNHLNSKIA YKIISQEPAGAPMFMVNR  
YTGEVRTMSNFLDREQHSMYNLLVRGSDRDGATDGLSSECDRIKILDVNDN  
FPILEKTSYSASIEENCLSELIRLQAIDLDEEGTDNWL AQYSILSGNDGNWFEI  
QTDPKTNEGILKVVKMLDYEQEPNIYLSIGVRNQA EFHHSVASQFQMHSTPV  
RIQVVNVREGPTFSPSSMTFSLRGGMRGASLMNYVLGTYTAIDMDTGNPATN  
VRYVIGHDAGSWLKVDSRTGEIQFSREFDMKSKYITDGIYAAQILAIDDGSGR  
TATGTICIEIPDANDYCPVIYAESRSVCTHASSVRIYVNDHSFGSPFTFCVDES  
PDIANIWDIRSINGTSAILMTEQTLSPGPYQIPILVKDSHNRACELPQTVLLDAC  
FCDDHHVCLHSSTTGIYTG DITWVTDDMYGTVTDDGVRQSNVGLGPAGIGMI  
ILGLLLLLLSPLLLLMCCCKRRQPEGLGTRFAPVPEGGEGVMQPWRIEGAHP  
DRDVSNICVPMTASNTQDRIDSSEIYNTYAGGGTVEGGVSGVELNTGVGTA  
TGMVAAGATGTLRKRSS TIGTLREYQDTGMNMAFLDSYFSEKAYAYADEDE  
GRPANDCLLIYDHEGAGSPVGSIGCCSWIVDDLDES YIETLDPKFRTLAEICLD  
TEIEPFP SHQACIPISTDLPLLGPNYFVNESSG MTLSEAEFQAEMAAASEPMIHG  
DIIVTETYTTSDPCVQPTTIVFDSQIPPNVVVTETVMAPVYDVQGNICVPAEIA  
NTHNVYYAERVVASPGIPDMGNSNISDACIGPVMSGGILVGPEIQVTQMMS  
DIHISQTTGSTSPM TSQHRVTRYSNMHYSRQ

>Mus\_musculus\_Dsg1b\_desmoglein 1 beta [Source:MGI  
Symbol;Acc:MGI:2664357]

MDWHSFRIAALLLTSLVVLEVNSEFQIQVRDHNAKNGTIKWHSIRRQKREWI  
KFAAACREGEDNSKRNP IAKIHSDCAANQPVTYRISGVGIDQPPYGIFIINQKT  
GEINITSIVDREVTPFFIIYCRALNAQQDLENPLELRVRVMDINDNPPVFSMT  
TFLGQIEENSNANTLVMKLNATDADEPNLNSMIAFKIIRQEPSDSPMFIINRK

TGEIRTMNNFLDREQYSQYSLVVRGSDRDGGADGMSAESECSITILDVNDNIP  
YLEQSSYDIEIEENALHSQLVQIRVIDLDEEFSDNWKAIIFFISGNEGNWFEIEM  
NERTNVGTLKVVKPLDYEAMKNLQLSIGVRNVAEFHQSIISQYRLTATMVTV  
TVLNVIEGSVFRPGSKTFVVDSRMEANHRVGEFVATDLDTGRASTNVRYEM  
GNNPENLLVVDSRTGIITLRNRVTMEQYQRLNGEYKGTVLSIDDSLQRTCTGT  
IVIELSGTGWVPGSDGGGSSSGSGGNRDPVTNGYQGTSTVGPQRVTGSGGVT  
SSGGGSGVNNTPGRQNPLDEPEPEPFDITEDNVHFGPAGIGLLIMGFLVLGLVP  
FLLICDCGGAPGGGAGFEPVPECSDGAIHTWAIEGPQPEPHDGITTICVPQMP  
PGNANVIEYIDNSGVYTNEYCGREMQLGGGERTTGFELMDGVKTSAAPEIC  
QEYSGTLRRNSMRECRDGGGLNMFMESYFCQKAYAYADEDEGRPSNDCLLI  
YDIEGVGSPAGSVGCCSFIGEDLDESFLDTLGPKFKKLADISLGKEIDSYDPDP  
SSWPPQSTEPMCPQSTEPPLGSGYPPISPHFGTTTWISENAYPSGPGVQHPLPIPD  
PLGYGNVTVRESYATSGTLKPSVHFHDNQQASNVVVTERVVGPVPGADLHG  
MLEIPDLRDGTNVIVTERVIAPGSSLPTSLTIPNPRETSNVVVTERVIQPTSGMI  
GNLSMTPELSSAQNVIVTERVVSGAGMSGIAGTAGLGGVGGIGSSGLVSTTM  
GAAGTGLNMGGTATIGHMRSSSDHHFSQTIGSASPMMARSRITKYSTVQYSK  
>Mus\_musculus\_Dsg1a\_desmoglein 1 alpha [Source:MGI Symbol;Acc:MGI:94930]  
MDWHSFRIAALLLTSLVVLEVNSEFQIQVRDHNAKNGTIKWHISRRQKREWI  
KFAAACREGEDNSKRNPiAKIHSDCAANQPVTYRISGVGIDQPPYGIFINQKT  
GEINITSIVDREVTFFIIYCRALNAQQQDLENPLELRVRVMDINDNPPVFSMT  
TFLGQIEENSNANTLVMKLNATDADEPNLNSMIAFKIIRQEPSDSPMFIINRK  
TGEIRTMNNFLDREQYSQYSLVVRGSDRDGGADGMSAESECSITILDVNDNIP  
YLEQSSYDITIEENALHSQLVQIRVIDLDEEFSDNWKAIIFFISGNEGNWFEIEM  
NERTNVGTLKVVKPLDYEAMKNLQLSIGVRNVAEFHQSIISQYRLTATMVTV  
TVLNVIEGSVFRPGSKTFVVDSRMEANHRVGEFVATDLDTGRASTNVRYEM  
GNNPENLLVVDSRTGIITLRNRVTMEQYQRLNGEYKGTVLSIDDSLQRTCTGT  
IVIELSGTGWVTGSESGSSSGGDDRDRVTNGYQGTSSSTENPQRVTGSWG  
SGIDGTRPNTNPFQGDDETLETPLYGDNVHFGPAGIGLLIMGFLVLGLVPFL  
ICDCGGAPGGGAGFEPVPECSDGAIHTWAVEGPQPEPHEGITTICVPQMPPG  
NANVIEYIDNSGVYTNEYCGREMQLGGGERTTGFELMDGVKTSAAPEICQE  
YSGTLRRNSMRECRDGGGLNMFMESYFCQKAYAYADEDEGRPSNDCLLIYD  
IEGVGSPAGSVGCCSFIGEDLDESFLDTLGPKFKKLADISLGKEIDSYPDS  
DPSWPPQSTEPMCPQHTEPLGSGHPPISPHFGTTTWISENAYHSGPGVQHPVPIPD  
LGYGNVTVRESYTTSGTLKPSVHFHDNQQASNVVVTERVVGPISGADLHGM

LEIPDLRGGANVIVTERVIAPGSSLPTS LTIPNPQETS NVVVTERVIQPTSGMIG  
NLSMTPELSSAHNVIVTERVVSGAGMSEIAGTAGLGGVGGIGSSGLVSTTMG  
ASGTGLNMGGTATIGHMRSSSDHHFSQTVGSASPSMARSRITKYNTVQYSK

>Mus\_musculus\_Dsg1c\_desmoglein 1 gamma [Source:MGI  
Symbol;Acc:MGI:2664358]

MDWHSFRIAALLLTSLVVLEVNSEFQIQVRDHNAKNGTIKWH SIRRQKREWI  
KFAAACREGEDNSKRNP IAKIHSDCAANQPVTYRISGVGIDQPPYGIFIINQKT  
GEINITSIVDREVT PFFIIYCRALNAQGQDLENPLELRVRVMDINDNPPVFSMT  
TFLGQIEENSNANTLVMKLNATDADEPNLNLSMIAFKIIRQEPSDSPMFTINRK  
TGEIRTMNNFLDREQYSQYSLVVRGSDRDGGADGMSAESECSITILDVNDNIP  
YLEQSSYDITIEENTLHSQLLQIRVIDLDEEFSDNWKAIFFISGNEGNWFEIEM  
NERTNVGTLKVVKPLDYEAVKNLQLCIGVRNVAEFHQSIISQYRLTVTLITVT  
VLNVVKGCVFQPGSKTFIVDSRMEANHTVGEFLATDCETGQATNKFKNVRY  
RYVMGNNPENLLVVDSGIITLRNRVTMEQYERLNKRYEGTVLSIHDSLQRTC  
TGTIIMVLCGFWTTTEHPTTSTEKPVTL SITPNVDNVHFGPAGIGLLIMGFLVL  
GLVPFLLISDCDCGGAPGGGAGFEPVPECS DGAHTWAVEGPQPGGITTICVPQ  
MPPGNANVIEYIDNSGVYTNEYCGREMQLGGGERTTGFELMDGVKTS AAP  
EICQEYSGTLRRNSMRECRDGG LNMNFMESYFCQKAYAYADEDEGRPSNDC  
LLIYDIEGVGSPAGSVGCCSFIEDLDESFLDTLGP KFKKLADISLGKEIDSYDPD  
DPSWPPQSTEPICPQHMEQLASGHPSISPHFGKTTVISENAYPSGPGVQHPLI  
PDPLGYGNITVRESYTTSGTLKPSVHFHDNQQASN VVVTERVVGPISGADLH  
GMLEIPALRDGTNVIVTERVIAPGSSLPNSLTIPNPRETSNVVVTERVIQPTSGM  
IGNLSIPP

>Mus\_musculus\_Dsc1\_desmocollin 1 [Source:MGI Symbol;Acc:MGI:109173]

MAVACAAPGSTFSKQLLFFLLVLVLFCDACQK VSLHVPSHLKAETPVGKVN L  
EECLKSPSLILSSDPAFRILEDGTIYTTHDLLSSEKRGFSILLS DGQQEQKKL  
EVLVSAREKKVFRKRHTKEPVHNRSKRRWAPIPCSLMENS LGPFPQHIIQQIQS  
DAAQNYTIFY SISGPGVDKEPYNLFYIEKDTGDIYCTRSIDREQYDQFLVYGY  
ATTADGYAPDYPLPLLFKVEDDNDNAPYFETKLT VFSVPENCRSGTSVGQVT  
AIDKDEPGTLHTRLKYKILQQIPDQPKHFSIHPDTGVITTTT PLLDREKCDTYK  
LVMEVRDMGGQPFGFLTGTITISLEDENDNSPYFTQTSYTTEVEENRIDVEIL  
RMVVHDQDLNTPHSAVY TILKGNENGNFKITDPNTNEGVLCVVKPLNYE  
VSRQVTLQIGVLNEAQFTNAANAQPPTMCTTTVT VKIKDRDEGPECQPPVKVI  
QSKDGLPAGQELLGYKAVDPETSSGEGRLRYEMV GDEDNWFEINKITGDLRTV

KVLDRESKFKNNQYNISVVATDTAGRSCTGTLVVLEDFNDHPPQIDKEVTI  
CQQEKDFAVLEPIDLDGPDNGPPFQFLLDNSSSKLWTLESQDGKRAILRQRHN  
LNYNYYSVPIQIQDRHGFSAXHVLVSRVCDCTTPTECRMAVKEERDAKPNIL  
GKWAILAMVLGSALLLCILFTFCVTTTKRTVKKCFPDDVAQQNLIVSNTEGP  
GEEVTEANIRLPTQTANICDTSMSVGTLLGGQGIKTQQSFEMVKGGGHTLESHK  
GGVLGAAEPGRYAYTDWQFTTQPRLGEKVYLQCGQAEHKKHCEYVVRPYN  
EGKGSMAGSVGCSSDRQEEGLEFLDQLEPKFRTLAKTCVKK

>Mus\_musculus\_Dsc2\_desmocollin 2 [Source:MGI Symbol;Acc:MGI:103221]  
MAAVGSMRSGSPAFGLGHLTLAILALASDACKEVVLQVPSELPAEKVGRV  
NLMDCLKSADIVHLSDPDFQVLEDGSVYTTSSVVLSSGQRSFTIWLSTDSQE  
EREISVHLEGPVEVLNKRPHTEKVLSRAKRRWAPIPCSMLENSLGPFLFLQQI  
QSDTAQNYTIYYSIRGPGVDKEPLNLFYVERDTGNLYCTGRVDREQYESFELT  
AFATTPDGYTPEYPLPLLIKIEDENDNYPIFTQKLYSFTVQENSRIGSIVGEVCA  
TDLDEPDTMHTRLRYSILEQSPSPMLFTMHPSTGVITTTSAQLDRELIDKYQL  
LIKVQDMDGQYFGLHTTAKCIITIEDVNDNLPTFTRTTYVTSVEENTVNVEILR  
LTVQDKDLVNSPNWRANYTILKGNENGNFKIVTDPKTNEGILCVIKPLDYEER  
QQVTLQIGVVNEAPYTREASSKSPMSTATVTVTVTNQDEGPECIPPMQTVRIQ  
ENVPVGTRNDGYKAYDPETRSSSGIRYRKLSDPRGWVTVNEDSGSITIFRALD  
REAETVRNGIYNITVLALDADGRSCTGTLGIILEDVNDNGPFIPKQTVVICKAT  
MSSAEIVAVDLDDPVNGPPPDFSLESSDSEVQRMWRLTRINDTAARLSYQND  
PSFGSYAVPIRVTDRLGLSSVTTLNVLVDCITESDCTLRSGERTGYADVRLGP  
WAILAILLGIALLCILFTLVCSVSRASKQQKILPDDLAQQNLIVSNTEAPGDD  
KVYSTNGLTTQTMGASGQTAFTTMGTGVKSGGQETIEMVKGGQQTLDSTRRG  
AGYHHHTLDPCRGGHVEVDNYRHTYSEWYNFIQPRLGDKVQFCHTDDNQK  
LAQDYVLTYNYEGKGSAAAGSVGCCSDLQEEDGLEFLDHLEPKFRTLAEVCA  
KR

>Mus\_musculus\_Dsc3\_desmocollin 3 [Source:MGI Symbol;Acc:MGI:1194993]  
MVVPEFRSPQCRACTKLLLTLWVFSFVGEACKKVTFHVPSTLEADKIIGRVS  
LKECLSSADGIMSPDFRVLDDGSVYPTRAVVLSDEKRSFTIQLSDSKMQTQ  
KEIPVILEHKKKVLKKRHTKETVLRSSKRRWAPIPCSMQENSLGPFLFLQQV  
QSDAAQNYTVFYSISGRGADQEPLNWWFFIERDTGNLYCTRVPVDREEYDVFDLI  
AYASTADGYSADLPLPLPIKIEDENDNYPLFTEAIYAFEVPEGSRLGTVVGTVC  
ATDKDEPDTMHTRLKYSILEQTPSPGLFSVHPDTGVITTVSHYMDREVVDK  
YKLIMKVQDMNGQFFGLISTSTCIITVQDSNDNAPTFRQNTYETAVENTYNV



EILRIPVDDKDMINTANWKANFTILKGNENGWFKITTPVTNEGVLCCVVKPL  
DYEENRQVTLEIGVNNEAPFIKDVANRIPTMNRAMVTVHVKDQNEGPECKPP  
EQYVRIKENS AVGSKINGYKAYDPETKNSNGLRYKKLQDPKDWVSIEEVSGL  
LTISKTL DREIMAPRNDMYNITVMAIDQEGKSCTGT LAVNIEDVNDNAPEIIQ  
DYIVICKPKMGYTDISAVDPDEPIHGPPFQFN LANTSPEVNR IWTLN QVNDTA  
ARLSYQKTADVQIYNVPVTVKDRAGQSATKILRVNLCDC THPSQCPLRSRSA  
GITLGK WAILAILLGIALLFSVLLTLVCGVVTARKGKHFPEDLAQQNLIISNTE  
APGDDRVC SANGFTTHTANNSSQGF CGTMGSGMRNGGQETIEMMKGHQTL  
DSCRVAGHHHTLDSGRGGHMDTDNCRYTYSEWHSFTQPRLGEKLVHCNQN  
EDHIPSQDYVLTYNYEGRGSPAGSVGCCSEKQEEEGLDLNNLEPKFLTLAET  
CTKR

>Mus\_musculus\_Mm\_Cdh5

MQRLTELATALGAFLGLLAVAAMAGPNFPQIDTPNMLPAHHRQKRDWIWN  
QM HIDE EK NESLPHYVGKIKSNVNRQNAKYVLQGEFAGKIFGVDANTGNVL  
A YERLDREKVSEYFLTALIVDKNTNKNLEQPSSFTVKVHDINDNWPVFSHQV  
FNASVP EMSAIGTSVIRVTAVDADDPTVAGHATVLYQIVKGNEYFSIDNSGLI  
FTKIKNLDREKQAEYKIVVETQDALGLRGESGTATVMIRLEDINDNFPVFTQS  
TYTFSVPEDIRVGKPLGFLT VVDPDEPQNRMTKYSIMQGEYRDTFTIETDPKR  
NEGIIKPTKSLDYEVIQQYTFYIEATDPTIRYEYLSSTSGKNKAMVTINVLDVD  
EPPVFQRHFYHFKL PENQKKPLIGTVVAKDPDKAQRSIGYSIRKTS DRGQFFRI  
TKQGN IYNEKELDRETYAWYNLTVEANELDSRGNPVGKESIVQVYIEVL DEN  
DNPPEFAQPYEPKVCENAAQGKLVVQISATDKDVVPVNP KFKFALKNEDSNF  
TLINNHDNTANITVKYGFNREHAKFH YLPVLISDNGVPSLTGTSTLTVGVCK  
CNEQGEFTFCEEMAAQAGVSIQALVAIFLCILTITVITLLIILRRRIRKQAH AHS  
KSALEIHEQLVTYDEEGGGEMDTTSYDVSVLNSVRGGSTKPLRSTMDARPAV  
YTQVQKPPRLAPGLHGGPREMATMIDVKKEEADNDGGGPPYDTLHIYGYEG  
AESIAESLSSLSTNSSDS DIDYDFLNDWGPRFKMLAELYGSDPQEELII

>Mus\_musculus\_Mm\_Cdh6

MRTYRYFLLLFWVGQPYPTFSNPLSKRTSGFPAKRKALELSANSRNELSRSKR  
SWMWNQFFLLEEYTGSDYQYVVGKLSHQDRGDGSLKYILSGDGAGDLFIINE  
NTGDIQATKRLDREEKPVYILRAQAVNRRTGRPVPESEFIIKIHDINDNEPIFT  
KD VYTATVPEMADVGTFFVQVTATDADDPTYGNSAKVVYSILQGQPYFSVE  
SETGIIKTALLNMDRENREQYQVVIQAKDMGGQMGGLSGTTTVNITLTDVND  
NPPRFPQSTYQFKTPESSPPGTPIGRIKASDADVGENAEIEYSITDGE GHEMFD

VITDQETQEGIITVKKLLDFEKKKVYTLKVEASNPHEPRFLYLGPFKDSATV  
RIVVDDVDEPPVFSKLAYILQIREDARINTTIGSVAAQDPDAARNPVKYSVDR  
HTDMDRIFNIDSGNGSIFTSKLLDRETLWHNITVIATEINNPKQSSRVPLYIKV  
LDVNDNAPEFAEFYETFVCEKAKADQLIQTLRAVDKDDPYSGHQFSFSLAPE  
AASSNFTIQDNKDN TAGILTRKNGYNRHEMSTYLLPVVISDNDYPVQSSTGT  
VTVRVCACDHHGNMQSCHAEALIHPTGLSTGALVAILLCIVILLVTVVLF AAL  
RRQRKKEPLIISKEDIRDNI VSYNDEGGGEEDTQAFDIGTLRNPEAMEDSKSRR  
DIVPEALFLPRRTPTARDNTDVRDFINQRLKENDTDPTAPPYDSLATYAYEGT  
GSVADSLSSLESVTTDGDQDYDYLSDWGPRFKKLADMYGGMDSKD

>Mus\_musculus\_Mm\_Cdh10

MTIYQFLRLFVLWACLPHFCCPELTFRRTPGIQQMTAESRAPRSDGKILHRQK  
RGWMWNQFFLLEEYTGSDYQYVVGKLSHSDQDKGDGSLKYILSGDGAGTLFII  
DEKTGDIHATRDRIDREEKAFYTLRAQAINRRTL RPVEPESEFVIKIHDINDNEPT  
FPEEIYTASVPMSVVGTSVVQVTATDADDPSYGNSARVIYSILQGQPYFSVE  
PETGIIRTALPNMNRENKEQYQVVIQAKDMGGQMGGLSGTTTTVNITLTDVND  
NPPRFQNTIHLRVLESSPVGTAVGSVKATDADTGKNAEVDYRIIDGDGDTM  
FDIITEKDTQEGIITVKKPLDYENRRLYTLKVEAENTHVDPRFY YLGPFKDTTI  
VKISIEDVDEPPVFSRSSYLFEVHEDIEVGTIIGTVMARDPDSTSSPIRFTLDRHT  
DLDRIFNIHSGNGSLYTSKPLDRELSQWHNLT VIAAEINNPKETTRVSVFVRIL  
DVNDNAPQFAVFYDTFVCENARPGQLIQTISA VDKDDPLGGQKFFFSLAAVN  
PNFTVQDNEDNTARILTRKNGFN RHEISTYLLPVVISDNDYPIQSSTGTLTIRVC  
ACDSQGNMQSCSAEALLLPAGLSTGALIAILLCIILLVIVVLF AALKRQRKKEP  
LILSKEDIRDNI VSYNDEGGGEEDTQAFDIGTLRNPA AIEKKLRRDIIPETLFIP  
RRTPTAPDNTDVRDFINERLKEHDLPTAPPYDSLATYAYEGNDSVAESLSSL  
ESGTTEGDQNYDYLR EWGPRFNKLAEMYGGGESDKDA

>Mus\_musculus\_Mm\_Cdh9

MRTYSCLQLVIWTCIFHMVDNSTLQ GKDSSHFLRRIVNLKKDEGKMLHRAK  
RGWMWNQFFLLEEYTGTDYQYVVGKLSHTDQDKGDGNLKYILTGDGAGNLFV  
IDENTGDIHAAKRLDREEKSLYILRAKAIDRKTGRQVEPESEFIIKIHDINDNEP  
KFTKDLYTASVPMSGVGTSVIQVTATDADDANYGNSAKVVYSILQGQPYFS  
VDPESGIIKTALPDMSRENKEQYQVVIQAKDMGGQMGGLSGTTTTVNITLTDV  
NNNPPRFQSTYQFNSLESAPLGTHLGRIKANDPDMGENAELEYSIAEGEGSD  
MFDVITDKDTQEGIITVKQNLDFEKKMLYTLRV DASNTHPDRFLHLGPFKDS  
AMVKISVEDVDEPPVFSKLSYLMEVDEDVKEGSIIGQVTAYDPDAMNNIIKYS

VDRHTDMDRVFSIHSSENGSIFTLKPLDRESSPWHNITITATEINNPKQSSQIPVFI  
RILDINDHAPEFATYYETFCENAKSGQLIQTISVMDKDDPPRGHKFFFEPVPE  
FPLNPNFTIVDNKDNTAGIVTRKDGYSRNKMNTYLLPVLIFDNDYPIQSSTGT  
LTIRVCACDNLGNMQSCNAEALMLAAGLSTGALIAILLCVVILLTLIVLFAAL  
KRQRKKEPLIISKDDVRDNIVTYNDEGGGEEDTQAFDIGTLRNPEAREDSKLR  
RDVMPETIFQIRRTVPLWENIDVQDFIHRRLKENDSDPSAPPYDSLATYAYEG  
NDSVANSLSLESALTADCNQDYDYLSDWGPRFKKLAEMYGGNDSDLN

>Mus\_musculus\_Mm\_Cdh7

MKLGKVELCHFLQLIALFLCFSGMSQAELPRSRSKPYFQSGRSRTKRSWWWN  
QFFVLEEYMGSDPLYVGKLSHSDVDKGDGSIKYILSGEGASSIFIIDENTGDIHA  
TKRLDREEQAYYTLRAQALDRLTNKPVEPESEFVIKIQDINDNEPKFLDGPYT  
AGVPEMSPVGTSSVQVTATDADDPTYGNSARVVYSILQGQPYFSVEPKTGVI  
KTALPNMDREAKDQYLLVIQAKDMVGQNGGLSGTTSVTVTLTDVNDNPPRF  
PRRSYQYNVPESLPVASVVARIKAADADIGVNAEMEYKIVDGDGLGIFKISAD  
KDTQEGIIQKELDFEAKTSYTLRIEAANRDADPRFLSLGPFSDTTTVKIIVED  
VDEPPVFSSPLYPMEVSEATQVGHIIGTVAAHDPDSSNSPVRYSIDRNTDLERY  
FNIDANSGVITAKSLDRETNAVHNITVLAMESQNPSQVGRGYVAITILDIND  
NAPEFAMDYETTVCENAQPGQVIQKISAVDKDEPSNGHQFYFSLTTDMTNNH  
NFSLKDNKDNTASILTRRNGFRRQEQSYYLPIFIVDSGSPSLSSTNTLTIRVCD  
CDADGIAQTCNAEAYVLPAGLSTGALIAILACVLTLLVILLIVTMRRRKKEPL  
IFDEERDIRENIVRYDDEGGGEEDTEAFDMAALRNLAIRDSKTRRDVTPEIQF  
LSRPTFKNIPDNVIFREFIWERLKEADVDPGAPPYDSLQTYAFEGNGSVAESLS  
SLDSISSNSDQNYDYLSDWGPRFKRLAEMYGNGQESLYS

>Mus\_musculus\_Mm\_Cdh20

MWTTGRMSNAKSWLGLGTSLYFWALMDLTATVLSSTPMPEVELETLFSGRS  
QSHQRSKRSWWWNQFFVLEEYTGTDPLYVGKLSHSDMDRGGDSIKYILSGEG  
AGIVFTIDDTTGDIAHQRLDREERAQYTLRAQALDRRTGRPMPESEFIIKIQD  
INDNEPKFLDGPYIATVPEMSPVGTSSVIQVTATDADDPTYGNSARVVYSILQG  
QPYFSVDSKTGVIRTALMNMDREAKEYEYEVIIQAKDMGGQLGGLAGTTTVNI  
TLSDVNDNPPRFQKHYQMSVLESAPISSTVGRVFAKDLDEGINAEMKYTIVD  
GDGADAFDINTDQNFQVGIITVKKPLSFESKKSITLKVEGSNPHEMRFLNLG  
PFQDTTTHISVEDVDEPPVFEPGFYFVEVPEDVTIGTTIQIISAKDPDVTNNSIR  
YSIDRGSDPGRFFYVDITTGALMTARPLDREEFSWHNITVLAMEMNNPSQVG  
SVAVTIKVLDVNDNAPEFPRFYEAFCENAKAGQLIQTVSAVDQDDPHNGQH

FYYSLAPEAANNPNFTVRDNQDNTARILTRRSGFRQQEQSVFYLPILIADSGQP  
VLSSTGTLTIQVCSCNDDGHVMSCSPEAYLLPVSLSRGALIAILACIFVLLVLV  
LLILSMRRHRKQPYIIDDENIHENIVRYDDEGGGEEDTEAFDIAAMWNPREA  
QAGAAPKTRQDMLPEIESLSRYVPQTCAVSSTVHSYVLAKLYEADMDLWAP  
PFDSLQTYMFEGDGSVAGSLSSLQSATS DSEQSFDFLTDWGPRFRKLAELYGA  
SEGPAPLW

>Mus\_musculus\_Mm\_Cdh12

MLTRNSLYLLLWILFDGGLLTPLQPQPQQLATEPKENVIHLSGRRSHFQRVK  
RGWVWNQFFVLEEYMGSEPPYVVKLHSDLDKGEKTVKYTLSGDGAGTVFTI  
DETTGDIHAIRSLDREEKPFYTLRAQAVDIETRKPLEPESEFIIKVQDINDNEPK  
FLDGPYVASVPEMSPVGAYVLQVKATDADDPTYGNSARVVYSILQGQPYFSI  
DPKTGVIRTALPNMDREVKEQYQVLIQAKDMGGQLGGLAGTTVVNITLTDV  
NDNPPRFPKSIFHLKVPESPVGSAIGRIRAVDPDFGKNAEIEYNIVPGDGGNLF  
DIVTDEDTQEGIIKLLKPLDFETKKAYTFKVEASNLHLDHRFHSAGPFKDTAT  
VKISVLDVDEPPVFSKPLYTMEVYEDTPVGTIIGAVTAQDLVDGSSAVRYFID  
WKSDGESYFTIDGTEGTIATNELLDRENMAQYNFSIIASKVSNPLLTSKVNILI  
NVLDVNEFPPEISVPYETAVCENAKPGQIIQIVGAVDRDLSPAGQQFSFRLAPE  
AVIKPNFTVHDFRNNTAGIETRRNGYSRRQQELYFLPIVIEDSSYPVQSSTNTM  
TIRVCRCDSDGTILSCNVEAIFLPVGLSTGALIAILLCMVILLAIVVLYVALRRQ  
RKKDTLMTSKEDIRDNVIHVDDEGGGEEDTQAFDIGALRNPKVIEENKIRRI  
KPDSLCLSRQPQVEDNTDIRDFIHRRLQENDADPAAPPYDSLATYAYEGNGS  
VAESLSSIDSLTTEADQDYDYLSDWGPRFKVLADMFGEEESYNPDNVT

>Mus\_musculus\_Mm\_Cdh8

MPERLAETLMDLWTPLIILWITLPSCVYTAPMNQAHVLTGSPLELSRQSEDM  
RILSRSKRGWVWNQMFVLEEFSGPEPILVGRLLHTDLDPGSKKIKYILSGDGAG  
TIFQINDITGDIHAIKRLDREEKAEYTLTAQAVDFETNKPLEPPSEFIIKVQDIND  
NAPEFLNGPYHATVPEMSILGTSVTNVTATDADDPVYGNSAKLVYSILEGQP  
YFSIEPETAIIKTALPNMDREAKEEYLVIQAKDMGGHSGGLSGTTTLTVTLT  
DVNDNPPKFAQSLYHFSVPEDVVLGTAIGRVKANDQDIGENAQSSYDIIDGD  
GTALFEITSDAQAQDGVIRLRKPLDFETKKS YTLKVEAANIHIDPRFSSRGPFK  
DTATVKIVVEDADEPPVFSSPTYLLEVHENAALNSVIGQVTARDPDITSSPIRFS  
IDRHTDLERQFNINADDGKITLATPLDRELSVWHNITIIATEIRNHSQISRVPVAI  
KVLVDVNDNAPEFASEYEAFLENGKPGQVIQTVSAMDKDDPKNGHFFLYSLL  
PEMVNNPNFTIKKNEDNSLSILAKHNGFNRRQKQEVYLLPIVISDSGNPPLSSTS

TLTIRVCGCSNDGVVQSCNVEAYVLPIGLSMGALIAILACIILLVIVVLFVTLR  
RHKNEPLIIKDDEDVRENIIRYDDEGGGEEDTEAFDIATLQNPDGINGFLPRKD  
IKPDLQFMPRQGLAPVPNGVDVDEFINVRLHEADNDPTAPPYDSIQIYGYEGR  
GSVAGSLSSLESTTSDSDQNFYLSDWGPRFKRLGELYSVGESDKET

>Mus\_musculus\_Mm\_Cdh11

MKENYCLQAALVCLSMLYHSQAFALERRSHLHPSFHGHHEKGKEGQVLQRS  
KRGWVWNQFFVIEEYTGPDVVLVGRLLHSDIDSGDGNIKYILSGEGAGTIFVID  
DKSGNIHATKTLDREERAQYTLMAQAVDRDTNRPLEPPSEFIVKVQDINDNPP  
EFLHEIYHANVPERSNVGTSVIQVTASDADDPTYGNSAKLVYSILEGQPYFSV  
EAQTGIIRTALPNMDREAKEEYHVVIQAKDMGGHMGGLSGTTKVTITLTDVN  
DNPPKFPQSVYQMSVSEAAVPGEEVGRVKAKDPDIGENGLVTYNIVDGDGIE  
LFEITTDYETQDGVVKKLPVDFETKRAYSLKIEAANVHIDPKFISNGPFKDTV  
TVKISVEDADEPPMFLAPSYIHEVQENAAAGTVVGRVHAKDPDAANSPIRYSI  
DRHTDLDRFFTINPEDGFIKTTKPLDREETAWLNISVFAAEIHNHRHQETKVPVA  
IRVLDVNDNAPKFAAPYEGFICESDHPKALSNOPIVTVSADDQDDTANGPRFI  
FSLPPEIMHNPNTVVRDNRDNTAGVYARRGGFSRQKQDFYLLPIVISDGGIPP  
MSSTNTLTIKVCDCVNGALLSCNAEAYILNAGLSTGALIAILACIVILLVIVV  
LFVTLRRQKKEPLIVFEEEDVRENIITYDDEGGGEEDTEAFDIATLQNPDGING  
FIPRKDIKPEYQYMPRPGLRPAPNSVDVDDFINTRIQEADNDPTAPPYDSIQIY  
GYEGRGSVAGSLSSLESATTDSDLDYDYLQNWGPRFKKLADLYGSKDTFDD  
DS

>Mus\_musculus\_Mm\_Cdh18

MRITSTSCICPVLVCLCFVQRCYGTAAHSSIKVTRNQTKHTEGETEVHHRPKR  
GWVWNQFFVLEEHMGPDQPQYVGKLHSNSDKGDGSVKYILTGEAGTIFIIDD  
TTGDIHSTKSLDREQKTHYVLHAQAIDRRTNKPLEPESEFIKQVQDINDNAPKF  
TDGPYIVTVPEMSDMGTSVLQVTATDADDPTYGNSARVVYSILQGQPYFSVD  
PKTGVIRTUALHNMDREAREHYSVVIQAKDMAGQVGGLSGSTTVNITLTDVN  
DNPPRFPQKHLYQYVPESAQVGSVAVGKIKANDADTGSNADMTYSITNGDGIG  
VFSISTDKDTREGILSLKKPLNYEKKSYYTLNIEGANTHLDFRFSHLGPFKDAT  
MLKVIVGDVDEPPLFSMPYSYVMEVYENAKIGTIVGTVLAQDPDSANSLVRYFI  
NHSTEEERFFNIDANTGTIKTSKVLDRRETPWYNITVTASENDNPDLLSHVSV  
GIRVLDVNDNPPELAREYDIVVCENSKPGQVIHTITATDKDDFANGPRFHFFL  
DERLPMNPNFTLKDNEANTASILTRRRRFRSRTMQDVYYLPIMISDGGIPSLSSS  
STLTIRVCACERDGRVRTCHAEAFSSAGLSTGALIAILLCVVILLAIIVLFIITL

RRGKKEPLIISEEDVRENVVITYDDEGGGEEDTEAFDITALRNPAAAEEFTYRR  
DIRPEVKLTPRHQTLSTLESIDVQEFIKQRLAEADLDPSVPPYDSLQTYAYEGQ  
RSEAGSISSLDSATTQSDQDYHYLGDWGPEFKKLAELYGEIESERTT

>Mus\_musculus\_Mm\_Cdh24

MWGLVRLLLAWLGGWGCMLAAPVPAWAGSRGHSPTLLRTRRSWVWN  
QFFVIEEYSGPEPVLIGKLHSDVDRGEGRTKYLLTGEGAGTVFVIDEATGNIH  
VTKSLDREEKAQYVLLAQAVDRASNRPLEPPSEFIKQDINDNPPVFPLGPYH  
ATVPEMSNVGTSVIQVTAHDADDPSYGNLAKLVYTVLDGLPFFSVDPQTGVV  
RTAIPNMDRETQEEFLVVIQAKDMGGHMGGLSGSTTVTVLSDVNDNPPKFP  
QSLYQFSVVETAGPGLVGRKKAQDPDLGDNALVAYSILNGEGSEVFSISTDS  
QGQDGLLTVRKPLDFETRYSYTFRVEATNTLIDPAYLRRGPFKDVASVRVTV  
QDAPEPPAFTQATYHLAVPENKAPGTLVGQISASDLSPASPIRYSILPHSDPE  
RCFSIEPEDGTIRTAVRLDREARVWHNLTILATELDSSAQSSRVQVAIQTLDEN  
DNAPQLAEPYDIFVCDLAPGQLIKVIRALDRDEVGNSSQVSLQGPVGPANF  
TVRDNRDGSASLLPSRPAPPRQAPYLIPIELWDWGQPALSSTATVTVSVCRC  
RPDGSMASCWPEAQLSPTGLSTGALLAIVTCMGTLLALVVLVVALRRQKQEA  
LMVLEEDVRENIITYDDEGGGEEDTEAFDITALQNPDGAAPPAAGPPVRRDV  
LPRTRAPRQPRPPGADVQVLLALRLREADEDPSVPPYDSVQVYGYEGRGSS  
CGSLSSLGSGSEAGGVPGAPELDDWGPLFRTLAELYGAKEPPAP

>Mus\_musculus\_Mm\_Cdh22

MRPRPEGALRAGAALSPVLLFLLLPLLGHLLWAASTPAPSSLSPGAQEDNQLG  
AGRVKRGWVWNQFFVVEEYTGTEPLYVGKIHSDSDEGDGTIKYTISGEGAGT  
IFLIDELTGDIAHATERLDREQKTFYTLRAQARDRATNRLLEPESEFIKQDIND  
SEPRFLHGPYIGSVAELSPTGTSVMQVMSDADDPTYGSSARLVYSVLDGEH  
HFTVDPKTGVIRTAVPDLDRSQERYEVVIQATDMAGQLGGLSGSTTVTIVVT  
DVNDNPPRFPQKMYQFSIQESAPIGTAVGRVKAEDSDVGENTDMTYHLREES  
GSGGDAFKVTTDSDTQEAIIVVQKHLDFESQQVHTVVLEALNKFVDPRFADL  
GTFRDQAIVRVAVTDVDEPPEFRPPSGLLEVQEDAQVGSVGVVTARDPDAA  
NRPVRYAIDRDSLEQIFDIDADTGAIVTGKGLDRETAGWHNITVLAMEADN  
HAQLSRASLRIRILDVNDNPELATPYEAAVCEDAKPGQLIQTISVDRDEPQ  
GGHRFYFRLVPEAPSNPHFSLLDIEDNTAAVHTQHVGFNREQDVFLLPILVV  
DSGPPTLSSTGTLTIRICGCDSSGTIQSCNTTAFVMAASLSPGALIALLVCVLIL  
VVLALLILTLRRHHKSHLSSDVDEDMRDNVIKYNDEGGGEQDTEAYDMSAL  
RSLYDFGELKGGDPGGGAASPPQAASSSERHSLPRGPSSPEPDFSVFRDFISRK



VALADADLSVPPYDAFQTYAFEGAGSPAASLSSLHSGSTGSEQDFAFLRAWG  
PRFRPLAALYAGHRGDDEAPAS

>Mus\_musculus\_Mm\_Cdh19

MNYCFLKHWILMIPLLWPCLKVSETLKAEKARRTVPSTWRAKRAWVWRPFV  
VLEEMDDIQCVGKLRSDLNNGNSFQYKLLGIGAGSFSINERTGEICAIQKLD  
REEKSLYILRAQVIDTTIGKAVETESEFVIRVLDINDNEPRFLDEPYEAIVPEMS  
PEGTFVIKVTANDADDPSTGYHARILYNLERGQPYFSVEPTTGVISSKMDRE  
LQDTYCVIIQAKDMLGQPGALSGTTTTSIKLSDINDNKPIFKESFYRFTISESAPI  
GTSIGKIMAYDDDIGENAEMEYSIEDDDSKIFDIIIDNDTQEGIVILKKKVDFEQ  
QSYYGIRAKVKNCHVDEELAPAHVNASTTYIKVQVEDEDEPPVFLPYILEI  
PEGKPYGTIVGTVSATDPDRRQSPMRYYL TGSKMFDINDNGTIITNMLDREV  
SAWYNLTVTATETYNVQQISSAHVYVQVFNINDNAPEFSQFYETYVCENAES  
GEIVQIISAIDRDESIEDHHFYFNHSLDTNNSFMLTDNQDNTAVILSNRTGFN  
LKEEPVFYMIILIADNGIPSLTSTNTLTIQVCDGDSRNTETCANKGLLFIMGFR  
TEAIIAIMICVMVIFGFFLILALKQRRKETLFPKTEDFRENIFCYDDEGGGEE  
DSEAFDIVELRQSTVMRERKPQRSKSAEIRSLYRQSLQVGPDSAIFRKFILEKL  
EEANTDPCAPPFDSLQTFAYEGTGSSAGSLSSLASRD TDQEDDFDYLN DLGPR  
FKRLASMFGSAVQPNN

>Mus\_musculus\_Mm\_E-Cad

MGARCRSFSALLLLLQVSSWLCQELEPESCSPGFSSEVYTFVPERHLERGHV  
LGRVRFEGCTGRPRTAFFSEDSRFKVATDGTITVKRHLKLHKLETSFLVRARD  
SSHRELSTKVTLKSMGHHHRHHHRDPASESNPELLMFPSVYPGLRRQKRD  
WVIPPISCPENEKGEFPKNLVQIKSNRDKETKVFYSITGQGADKPPVGVFIERE  
TGWLKVTQPLDREAIAKYILYSHAVSSNGEAVEDPMEIVITVTDQNDNRPEFT  
QEVFEGSVAEGAVPGTSMKVSATDADDDVNTYNAAIAYTIVSQDPELPHK  
NMFTVNRDTGVISVLTSGLDRESYPTYTLVVQAADLQGEGLSTTAKAVITVK  
DINDNAPVFN PSTYQGQVPENEVNARIATLKVTD DDAPNTPAWKAVYTVVN  
DPDQQFVVVTDPTTNDGILKTAKGLDFEAKQQYILHVRVENE EPFEGSLVPST  
ATVTVDVVDVNEAPIFMPAERRVEVPEDFGVGQEITSYTAREPDTFMDQKIT  
YRIWRDTANWLEINPETGAIFTRAEMDREDAEHVKNSTYVALIIATDDGSPIA  
TGTGTL LLVLLDVNDNAPIPEPRNMQFCQRNPQPHIITILDPDLPPNTSPFTAEL  
THGASVNW TIEYNDA AQESLILQPRKDLEIGEYKIH LKLADNQNKDQVTTLD  
VHVCDC EGTVNNCMKAGIVAAGLQVPAILGILGGILALLLILLLLLLFLRRRTV  
VKEPLLPPDDDTRDNVYYYYDEEGGGEEDQDFDLSQLHRGLDARPEVTRNDV

APTLMSVPQYRPRPANPDEIGNFIDENLKAADSPTAPPYDSLLVFDYEGSGS  
EAASLSSLNSSESDQDQDYDYLNWGNRFKKLADMYGGGEDD

>Mus\_musculus\_Mm\_P-Cad

MELLSGPHAFLLLLLQVCWLRSVVSEPYRAGFIGEAGVTLEVEGTDLEPSQVL  
GKVALAGQGMHHADNGDIIMLTRGTVQGGKDAMHSPPTRILRRRKREWVM  
PPIFVPENGGKPPFPQRLNQLKSNKDRGTKIFYYSITGPGADSPPEGVFTIEKESG  
WLLLHMPLDREKIVKYELYGHAVSENGASVEEPMNISIIVTDQNDNKPKFTQ  
DTRGVSLEGVMPGTSVMQVTATDEDDAVNTYNGVVAYSIHSQEPKEPHDL  
MFTIHKSTGTISVISSGLDREKVPEYRLTVQATDMDGEGSTTTAEAVVQILDA  
NDNAPEFEPQKYEAWVPENEVGHEVQRLTVTDLDVPNSPAWRATYHIVGGD  
DGDHFTITTHPETNQGVLTTKKGLDFEAQDQHTLYVEVTNEAPFAVKLPTAT  
ATVVVHVKDVNEAPVFPVPSKVIEAQEGISIGELVCIYTAQDPDKEDQKISYTI  
SRDPANWLAVDPDSGQITAAGILDREDEQFVKNNVYEVMLATDSGNPPTT  
GTGTLTLLTDINDHGPIPEPRQIIICNQSPVPQVLNITDKDLSPNSSPFQAQLTH  
DSDIYWMAEVSEKGDVVALSLKKFLKQDQTYDLHLSLSDHGNREQLTMIRAT  
VCDCHGQVFND CPRPWKGGFILPILGAVLALLTLLALLLLVRKKRKVKEPL  
LLPEDDTRDNVFFYYGEEGGGEEDQDYDITQLHRGLEARPEVLRNDVVPTFI  
PTPMYRPRPANPDEIGNFIIENLKAANTDPTAPPYDSLLVFDYEGSGSDAASLS  
SLTTSASDQDQDYNLNEWGSRFKKLADMYGGGEDD

>Mus\_musculus\_Mm\_N-Cad

MCRIAGAPRTLPLLAALLQASVEASGEIALCKTGFPEDVYSAVLPKDVHEGQ  
PLLNVKFSNCNRKRKVQYESSPADFKVDEDGTVYAVRSFPLTAEQAKFLIY  
AQDKETQEKWQVAVNLSREPTLTEPMKEPHEIEEIVFPRQLAKHSGALQRQ  
KRDWVIPPINLPENSRGPPFQELVRIRSDRDKNLSLRYSVTGPGADQPPTGIFII  
NPISGQLSVTKPLDRELIARFHLRAHAVDINGNQVENPIDIVINVIDMNDNRPE  
FLHQVWNGSVPEGSKPGTYVMTVTAIDADDPNALNGMLRYRILSQAPSTPSP  
NMFTINNETGDIITVAAGLDREKVQQYTLIIQATDMEGNPTYGLSNTATAVIT  
VTDVNDNPPEFTAMTFYGEVPENRVDVIVANLTVTDKDQPHTPAWNAAYRI  
SGGDPTGRFAILTDPNSNDGLVTVVKPIDFETNRMFVLTVAAENQVPLAKGIQ  
HPPQSTATVSVTVIDVNENPYFAPNPKIIRQEEGLHAGTMLTTLTAQDPDRYM  
QQNIRYTKLSDPANWLKIDPVNGQITTIAVLDRESPNVKNNIYNATFLASDNG  
IPPMSGTGTLQIYLLDINDNAPQVLPQEAETCETPEPNSINITALDYDIDPNAGP  
FAFDLPLSPVTIKRNWTINRLNGDFAQLNLKIKFLEAGIYEVPIIITDSGNPPKS  
NISILRVKVCQCDSNGDCTDVDRIVGAGLGTGAIHAILLCIILLILVLMFVWVM

KRRDKERQAKQLLIDPEDDVRDNILKYDEEGGGEEEDQDYDLSQLQQPDTVEP  
DAIKPVGIRRLDERPIHAEPQYPVRSAAHPHGDIGDFINEGLKAADNDPTAPPY  
DSSLVFDYEGSGSTAGSLSSLNSSSSGGDQDYDYLDNDWGPRFKKLADMYGG  
GDD

>Mus\_musculus\_Mm\_R-Cad

MTTGSVLPLLLLGLSGALRAHREDLTVREACKAGFSEEGYTALISPNVLEGEK  
LLKVEFSSCVGTKGMQYETNSLDFKVGADGTVFATRELKIPSEQVAFTVTAR  
ERQSAEQWAAMVRLLLVAQTSSAHSEHKKKGQTVALDPSQPPNDTLLPWPQHQ  
SSGGLRRQKRDWVIPPINVPENSRGPFQQLVRIRSDKNDIPIRYSITGVGAD  
QPPMEVFNIDSMGRMYVTRPMDREERASYHLRAHAVDMNGNKVENPIDLY  
IYVIDMNDNRPEFINQVYNGSVDEGSKPGTYVMTVTANDADDSTTANGMVR  
YRIVTQTPQSPSQNMFTINSETGDIVTVAAGLDREKVQQYTVIVQATDMEGN  
LNYGLSNTATAIITVTDVNDNPPEFTTSTFAGEVPENRIETVVANLTVMDRDQ  
PHSPNWNNAVYRIISGDPSGHFSVRTDPVTNEGMVTVVKAVDYELNRAFMLT  
VMVSNQAPLASGIQMSFQSTAGVTISVTDVNEAPYFPSNHKLIRLEEGVPAGT  
ALTTFSAVDPDRFMQQAVRYSKLSDPANWLHINTSNGQITTAAILDRESLYTK  
NNVYEATFLAADNGIPPASGTGTLQIYLIDINDNAPQLLPKEAQICERPGLNAI  
NITAADADMDPNIGPYVFELPFIPTTVRKNWTITRLNGDYAQLSLRILYLEAG  
VYDVPIIVTDSGNPPLSNTSVIKVKVCPCDENGDCCTTVGAVAAAGLGTGAIVA  
ILICIVILLIMVLLFVWWMKRREKERHTKQLLIDPEDDVRDNILKYDEEGGGEE  
DQDYDLSQLQQPEAMEHVLSKTPGVRRVDERPVGAEPQYPVRPVVPHPGDIG  
DFINEGLRAADNDPTAPPYDSSLVFDYEGSGSTAGSVSSLNSSSSGDQDYDYLD  
NDWGPRFKKLADMYGGGEEED

>Mus\_musculus\_Mm\_M-Cad

MGSALLLALGLLAQSLGLSWAVPEPKPSTLYPWRRASAPGRVRRRAWVIPPIS  
VSENHKRLPYPLVQIKSDKQQLGSIYISIQGPGVDEEPRNVFSIDKFTGRVYLN  
ATLDREKTDRFRLRAFALDLGGSTLEDPTDLEIVVVDQNDNRPAFLQDVFRG  
RILEGAIPGTFVTRAEATDADDPETDNAALRFSILEQGSPEFFSIDEHTGEIRTV  
QVGLDREVAVYNLTLQVADMSGDGLTATASAIISIDDINDNAPEFTKDEFF  
MEAAEAVSGVDVGRLEVEDKDLPGSPNWVARFTILEGDPDGQFKIYTDPKTN  
EGVLSVVKPLDYESREQYELRVSVQNEAPLQAAAPRARRGQTRVSVWVQDT  
NEAPVFPENPLRTSIAEGAPPGTSVATFSARDPDTEQLQRISYSKYDYPEDWL  
QVDGATGRIQTQRVLSASPFLKDGWYRAIILALDNAIPPSTATGTLSIEILEVN  
DHAPALALPPSGSLCSEPDQGPGLLLGATDEDLPPHGAPFHFQLNPRVPDLGR

NWSVSVQINVSHARLRLRHQVSEGLHRLSLLLQDSGEPQQREQTLNVTVCRC  
GSDGTCLPGAAALRGGGVVSLGALVIVLASTVLLVLLAALRTRFRGHS  
RGKSLHGLQEDLRDNILNYDEQGGGEEDQDAYDINQLRHPVEPRATSRLG  
RPPLRRDAPFSYVPQPHRVLPTSPSDIANFISDGLEAADS DPSVPPYDTALIYDY  
EGDGSVAGTLSSILSSLGDEDQDYDYLRDWGPRFARLADMYGHQ

>Drosophila\_melanogaster\_Dm\_N-Cad

MAARRCLNQLRQRYITNRFNICTCAIFLISLPFILAIETTFAGLSAENAARMLA  
GSPGDVEKSSLSHHSEMSLVLPHDTYPGFSIKKFKTHPVKINGSSSHSGAAAYH  
MLDTDYSKYFTVLEDGVVMTTADISPLVNRPVQLVVVEQTPNATNTHNLQL  
FVMHRNDMLRFSGSLLDASGEVRENQPAGTRVRGVPLMQAFSGSILDEELAT  
PKKVRYTIIDGNVDDAFALQERKANKNIQISAKSLVINGDDESGVWLVNTRPL  
DREERAHYDLSVEASVDVGLDRTVSKIQITVLDENDNRPIFKSLDYKFAIAGQ  
KSASMESNSSVTYQRFAIMGKVEATDADGDKIAYRLKSPSNVVIIVPQTGEIM  
LAGEPTSNELLIEVIAHDLRYPSLVSAKPAKVLEFLAAEPVSFIMQHLEHDDI  
NNHSHHREKRRVTRAVRPTKRIEFTEADGDTEGKSVFQLEKETDKETFKIRDD  
NPWVTVETNGAVRVKKKWDYEELGPEKTIDFWVIITNMGHNAGIKYTDNQR  
VILLVKDVNDEPPYFINRPLPMQAVVQLNAPPNTPVFTLQARDPDTDHNIHYFI  
VRDRTGGRFEVDERSGVVRTRGTDLFQLDMEYVLYVKAEDQNGKVDDRRF  
QSTPEERLSIVGGKRAPQFYMPSEAEIPENQKKSDIISIKAKSFADREIRYTL  
KAQQQGAGTFNIGPTSGIVKLAKELDFEDLRQPHVYSLIVTATEDSGGFSTSV  
DLTIRVTDVNDNAPKFELPDYQAHNVDEDIPLGTSILRVKAMDSDSGSNAEIE  
YLVSDDHFAVDSNGIIVNKKQLDADNNNAYYEFIVTAKDKGEPKSGVATVR  
VYTKNKNDEEPKFSQQVYTPNVDENAGPNTLVTTVVASDKDGDNVRFVGFV  
GGTSSGQFVIEDITGVIRLHNKAISLDKDKYELNVTAMDDGSCCVNGDQTIHT  
STAVVVVFITDVNDNKPVKDCSTYYPKVEEGAPNGSPVIKVVATDEDKGVN  
GQVKYSIVQQPNQKGTKFTVDEETGEVSTNKVFDREGDDGKFSVTVKATD  
QGDPSLEGVCSFTVEITDVNDNPLFDRQKYVENVKQDASIGTNILRVSASDE  
DADNNGAIVYSLTAPFNPNDLEYFEIQAESGWIVLKKPLDGCYPRDRYRLRVS  
ASDKGTPASAADVVELDVVDRNKPPIWDKSIYGPIHIRENVTVGTVVTSV  
KASSGIEGNPTVFYRLMPGSTAQTNKFHTFYLQQRPDNGDTWADIKVNHPLD  
YESIKEYNLTIRVENNGAQQQLASEATVYIMLEDVNDEIPLFTEREQETVLEGE  
IGTKVTQVNAIDKDGTFPNNQVYYYIVDSRNEGKEFFEINLQSGEIFTKT VFD  
REKKGAYALEVEARDGAPSARPNSNGPNSVTKFIRIGIADKNDNPPYFDKSLY  
EAEVDENEDIQHTVLTVTAKDHDESSRIRYEITSGNIGGAFVKNMTGAIYVA

GALDYETRRRYELKLVASDSLNNQTTIVINVRDVNDLPPQFPQTSYERTLDE  
GMTNTPFTIMQVTATDGDKDRPQNIVYFLTGGQIDPDNPANSKFDINRTTGEI  
FVLKPLDRDQPNGRPQWRFTVFAQDEGGGLVGYADVQVNLKDINDNAPIFP  
QGVYFGNVTENGTAGMVVMTMTAVDYDDPNEGSNARLVYSIEKNVIEEETG  
SPIFEIEPDTGVIKTAVCCLDRERTPDYSIQVVAMDGGGLKGTGTASIRVKDIN  
DMPPQFTKDEWFTEVDETDGTALPEMPILTVTVHDEDETNKFQYKVIDNSGY  
GADKFTMVRNNDGTGSLKIVQPLDYEDQLQSNQFRFRIQVNDKGEDNDNDK  
YHVAYSWVVVKLKRDINDNKPHFERANVEVSVEFDTKVGTELEKFKATDPDQ  
GGKSKVSYSIDRSSDRQRQFAINQNGSVTIQRSLDREVPRHQVKILAIIDDGSP  
PKTATATLTVIVQDINDNAPKFLKDYRPVLPEHVPPRKVVEILATDDDDRSKS  
NGPPFQFRLDPSADDIIRASFKEQDQKANGDGMAVISLRSFDREQQKEY  
MIPIVKDHGSPAMTGTSTLTVIIGDVNDNKMQPGSKDIFVYNYQGQSPDTPIG  
RVYVYDLDDWDLDPDKKFYWEAMEHPRFKLDEDSGMVTMRAGTREGRYHL  
RFKVYDRKHTQTDIPANVTVTVREIPHEAVVNSGSVRLSGISDEDFIRVWNYR  
TQSMSRSKMDRFRDKLADLLNTERENVDFISVQLKRKHPLTDVRFSAHGS  
YYKPVRLNGIVLMHREEIEKDVGINITMVGIDECLYENQMCEGSCTNSLEISPL  
PYMVNANKTALVGVRVDTIADCTCGARNFTKPESCRTTPCHNGGRCVDTRF  
GPHCSCPVGYTGPCRCQQTTRSFRGNGWAWYPPLEMCDESHLSLEFITRKP  
LIIYNGPIVPPERDETLISDFIALELERYPRLLIDFGSGTLELRVKTKKTLDDGE  
WHRIDLFWDTESIRMVVDVFCXSAEIAEMEDGTPPEFDDMSCQARGQIPPFNEY  
LNVNAPLQVGGLYREQFDQSLYFWHYMPTAKGFDGCIRNLVHNSKLYDLAH  
PGLSRNSVAGCPQTEEVCAQTETTARCWEHGNCVGSLSSEARCHCRPGWTGP  
ACNIPTIPTTFKAQSYVKYALSFEPPDRFSTQVQLRFRTREEYGELFRVSDQHNR  
EYGILEIKDGHLLHFRYNLNSLRTEEKDLWLNAIVVNDGQWHVVKVNRYS  
ATLELDGGEGRRYNETFEFVGHQWLLVVKQEGVYAGGKAEYTGVRTFEVY  
ADYQKSCLDLDIRLEGKHLPLPPAMNGTQWGQATMARNLEKGCPSNKPCSNV  
ICPDPFECVDLWNVYEECTCGEGRIMSPDSKGCMDRNECLDMPCMNGATCINL  
EPRLRYRCICPDGFWGENCELVQEGQTLKLSMGALAAILVCLLILILVLFV  
YNRRREAHIKYPGPDDDVRENIINYDDEGGGEDDMTAFDITPLQIPIGGPMPPE  
LAPMKMPIMYPVMTLMPGQEPNVGMFIEEHKKRADGDPNAPPFDDLRYAY  
EGGGSTAGSLSSLASGTDDEQEQEYDYLGAWGPRFDKLANMYGPEAPNPHNT  
ELEL

>Drosophila\_melanogaster\_Dm\_E-cad

MSTSVQRMSRSYHCINMSATPQAGHLNPAQQQTHQQHKRRCRDLGRRLIPA  
RLLLGIVVAISLLSPALALHSPDKNFSGDNRKPAFKNCAGYAPKVKEEQPEN  
TYVLTVEAVDPDPDQVIRYSIVQSPFERPKFFINPSTGVIFTTHTFDRDEPIHEK  
FVFVTVQATDNGLPPLDDVCTFNVTIEDINDNAPAFNKARYDESMSENAQPD  
AVVMTISASDFDDGNNSLVEYEILRERDFQYFKIDKESGIYLRPIDKPRGQS  
YAIIVRAYNVVPPDPPQDAQIEVRIRVVESSIKPPSFVNPIDTPIYLKENLKNFTH  
PIATLRAVSNMPDKPEVIFELNTGRTEQTN SKNTFVFNQIGNEVTISLGKTLDY  
EAITDYTLTMIVRNTHELGTEHQIKIQVEDVNDNIPYYTEVKSGETILENEPPGT  
PVMQVRAFDMDGTSANNIVSFELADNREYFTIDPNTGNITALTTFDREERDFY  
NVKVIASDNSPSSLFDNGEPNRGHQVFRISIGDKNDHKPHFQQDKYLAERLLE  
DANTNTEVIEVKAEDEDNASQILYSIESGNVGDFAKIGLKTGKITVNQKLDYE  
TITEYELKVRAFDGIYDDYTTVVIKIEDVNDNPPVFKQDYSVTILEETTYDDCI  
LTVEAYDPDIKDRNADQHIVYSIHQNDGNRWTIDNSGCLRLVKTLDRDPPNG  
HKNWQVLIKANEDDGVGTTVSTVKEVTVTLKDINDNAPFLINEMPVYWQEN  
RNPGHVVQLQANDYDDTPGAGNFTFGIDSEATPDIKTKFSMDGDYLVHANVQ  
FDREAQKEYFIPIRISDSGVPRQSAVSILHLVIGDVNDNAMSEGSSRIFIYNYKG  
EAPETDIGRVFVDDLDDWLEDKYFEWKDLPHDQFRLNPSTGMITMLVHTA  
EGEYDLSFVVTEDSMFVPRHSVDAYVTVVVRELPEEAVDKSGSIRFINVTKEE  
FISVPRDFQSPDALS LKDR LQLSLAKLFNTSVSNVDVFTVLQENHTLDVRF S  
AHGSPYYAPEKLN GIVAQNQQRL ENELDLQMLMVNIDECLIEKFKCEESCTN  
ELHKSSVPYMIYSNTTSFVGVNAFVQAQCVC EAPLMRRCLNGGSPRYGEND  
VCDCIDGFTGPHCELVSVAFYGSGYAFYEPIAACNNTKISLEITPQIDQGLIMY  
LGPLNFNPLLAISDFLALELDNGYPVLTVDY GSGAIRIRHQHIK MVADR TYQL  
DIILQRTSIEMTV DNCRLSTCQTLGAPIGN EFLNVNAPLQLGGTPVDLEQLGR  
QLNWITHVPNQKGFFGCIRNLTINEQTYNLGMPSVFRNIDSGCQQSVAVAFSF  
GIDRNFIIAIVCLALLIILLAVVVQKKQKNGWHEKDIDDI RETIINYEDEGGG  
ERDTDYDLNVLRTQPFYEEKLYKDPHALQGNMRDPNDIPDIADFLGDKKENC  
DRDVGATTVDDVRHYAYEGDGNSDGSLSLASCTDDGDLNFDYLSNFGPRF  
RKLADMYGEEPSDTDSNVDDDQGWRI

>Drosophila\_melanogaster\_Dm\_dachsous

MKATLDSVVASETMTRVTF TGNHESKDF AIFHRCRRRSNIKSLYSPPALHPSH  
MLRSSLLILLAIVLLGSSQAASHDQERERKLEVFEGVAVDYQIGYIGDFGGIDS  
GPPYIIVAEAGVETDLAIDRATGEIRTKVKLDRETRASYSLVAIPLSGRNIRVL  
VTVKDENDNAPTFPQTSMHIEFPENTPREVKRTLLPARDLDLEPYNTQRYNIV



SGNVNDAFRLSSHRERDGVLYLDLQISGFLDRETPGYSLLEALDGGTPPLR  
GFMTVNITIQDVNDNQPIFNQSRFYATVPENATVGTSVLQVYASDTDADENG  
LVEYAINRRQSDKEQMFRIDPRTGAIYINKALDFETKELHELVVVAKDHGEQP  
LETTAFVSIRVTDVNDNQPTINVIFLSDDASPKISESAQPGEFVARISVHDPDSK  
TEYANVNVTLNGGDGHFALTTRDNSIYLVIVHLPLDREIVSNYTLSVVATDK  
GTPPLHASKSIFLRITDVNDNPPEFEQDLYHANVMEVADPGTSVLQVLAHDR  
DEGLNSALTYSLAETPETHAQWFQIDPQTGLITRSHIDCETEPVPLTVVARD  
GGVPLSSTATVLTIHVDVNDNEPIFDQSFYNVSVVAENEPVGRCILKVSASDPD  
CGVNAMVNYTIGEGFKHLTEFEVRSASGEICIAGELDFERRSSYEFPVLATDR  
GGLSTTAMIKMQLTDVNDNRPVFPREYKVSLRESPKASSQASSTPIVAVVAT  
DPDYGNFGQVSYRIVAGNEAGIFRIDRSTGEIFVVRPDMLSVRTQPMHMLNIS  
ATDGGNLRNADAVVFLSIIDAMQRPIFEKARYNYVVKEDIPRGTVVGSVIA  
ASGDVAHRSPVRYSIYSGDPDGYFSIETNSGNIRIAKPLDHEAKSQVLLNIQAT  
LGEPPVYGHTQVNIEVEDVNDNAPEFEASMVRISVPESAELGAPLYAAHAHD  
KDSGSSGQVTYSLVKESGKGLFAIDARSGHLILSQHLDYESSQRHTLIVTATD  
GGVPSLSTNLTLVDVQDVNDNPPVFEKDEYSVNVSESRINAQIIQVNASDLD  
TGNNARITYRIVDAGVDNVTNSISSSDVSQHFQIFPNSGWIYLRAPLDRETRDR  
YQLTVLATDNGTPAAHAKTRVIVRVLDANDNDPKFQKSKYEFRIEENLRRGS  
VVGVV TASDLDLGENAAIRYSLLPINSSFQVHPVTGEISTREPLDRELRELYDL  
VVEARDQGTPVRSARVPVRIHVSDVNDNAPEIADPQEDVSVVREEQPPGTEV  
VRVRAVDRDHGQNASITYSIVKGRDSDGHGLFSIDPTSGVIRTRVLDHEERSI  
YRLGVAASDGGNPPRETVRMLRVEVLDLNDNRPTFTSSSLVFRVREDAALGH  
VVGSIPIERPADVVRNSVEESFEDLRVITYTLNPLTKDLIEAAFIDIDRHSGNLV  
VARLLDREVQSEFRLEIRALDTTASNPNQSSAITVKIEVADVNDNAPEWPQDP  
IDLQVSEATPVGTIIHNFTATDADTGTNGDLQYRLIRYFPQLNESQEAMSLFR  
MDSL TGALS LQAPLDFEAVQEYLLIVQALDQSSNVTERLQTSVTVRLRILDAN  
DHAPHFVSPNSSGGKTASLFISDATRIGEVVAHIVAVDEDSGDNGQLTYEITG  
GNGEGRFRINSQTGIIELVKSLPPATEDVEKGGRFNLIIGAKDHGQPEPKKSSL  
NLHLIVQGSHNNPPRFLQAVYRATILENVPSGSFVLQVTAKSLHGAENANLSY  
EIPAGVANDLFHVDWQRGIITTRGQFDRESQASYVLPVYVRDANRQSTLSSSA  
VRKQRSSDSIGDTSNGQHFDVATIYITVGDVNDNSPEFRPGSCYGLSVPENSEP  
GVIHTVVASDLDEGPNADLIYSITGGNLGNKFSIDSSSGELSARPLDREQHSRY  
TLQIQASDRGQPKSRQGHCNITIFVEDQNDNAPRFKLSKYTGSVQEDAPLGTS  
VVQISAVDADLGVNARLVYSLANETQWQFAIDGQSGLITTVGKLDRELQASY

NFMVLATDGGRYEVRSATVPVQINVLDINDNRPIFERYPPYIGQVPALIQPGQT  
LLKVQALDADLGANAIEVYSLNAENSAVSAKFRINPSTGALSASQSLASESGK  
LLHLEVVARDKGNPPQSSLGLIELLIGEAPQGTPVLRFNQNETYRVMLKENSPTS  
GTRLLQVVALRSDGRRQKVQFSFGAGNEDGILSLDLSLGEIRVNKPHLLDYD  
RFSTPSMSALSRRALHYEEEEIDESSEEDPNNSTRSQRALTSSSFALTNSQPNEI  
RVVLVARTADAPFLASYAELVIELEDENDNSPKFSQKQFVATVSEGNNKGT  
VAQVHAFDSDAGSNARLRYHIVDGNHDNAFVIEPAFSGIVRTNIVLDREIRDI  
YKLIKIIATDEGVPQMTGTATIRVQIVDVNDNQPTFPPNNLVTVSEATELGAVI  
TSISANDVDTYPALTYRLGAESTVDIENMSIFALDRYSGLVLRRLDYELQQ  
EYELDVIASDAAHEARTVLTVRVNDENDNAPVFLAQQPPAYFAILPAISEISES  
LSVDFDLLTVNATDADSEGNNKVIYIIEPAQEGFSVHPSNGVSVNMSRLQP  
AVSSSGDYFVRIIAKDAGKPAKSSSTLLRVQANDNGSGRSQFLQNQYRAQISE  
AAPLGSVVLQLGQDALDQSLAIIAGNEESAFELLQSKAIVLVKPLDRERNDLY  
KLRLVLSHPHGPPLISSLNSSSGISVIITILDANDNFPIFDRSAKYEAIESELAPLR  
YSIAQLQAIDADQENTPNSEVVYDITSGNDEHMFITDLVTGVLVFNRLDYDS  
GAKSYELIIRACDSHHQRPLCSLQPFRELEHDENDNEPKFPLTEYVHFLAENEP  
VGSSVFRAHASDLKGPFGQLNYSIGPAPSESSWKMFRVDESEGLVTSFAVVF  
DYEQRQRYDMELLASDMGGKKASVAVRVEIESRDEFTFPQFTERTYRFVLPAA  
VALPQGYVVGQVTATDSDSGPDGRVVYQLSAPHSHFKVNRSSGAVLIKRLK  
KLDGDGDGNLYMDGRDISLVISASSGRHNSLSSMAVVEIALDPLAHPGTNLA  
SAGGSSSGSIGDWAIGLLVAFLLVLCAAAGIFLFIHMRSRKPRNAVKPHLATD  
NAGVGNTNSYVDPSAFDTIPIRGSISGGAAGAASGQFAPPKYDEIPFGAHAGS  
SGAATTSELSESGSEQSGSSGRGSAEDDGEDEEIRMINEGPLHHRNGGAGAGSD  
DGRISDISVQNTQEYLARLGIVDHDPSGAGGGASSMAGSSHPMHL YHDDDAT  
ARSDITNLIYAKLNDVTGAGSEIGSSADDAGTTAGSIGTIGTAITHGHGVMSSY  
GEVPVPVPPVVGGSNVGGSLSIVHSEEELTGSYNWDYLLDWGPQYQPLAH  
VFSEIARLKDDTLSEHSGSGASSSAKSKHSSSHSSAGAGSVVLKPPPSAPPTHIP  
PPLL TNVAPRAINLPMRLPPLSLAPAHLPRSPIGHEASGSFSTSSAMSPSFSPS  
LSPLATRSPSISPLGAGPPTHLPVSLPRHGHAPQPSQRGNVGTMR

>Mus\_musculus\_Mm\_Cdh26

MDTRGCAWLLLLSLPQQGQSHQPLHRSKRRWVLTTLLELQEEDPGPFKLVGE  
LFNNMSNNVSLIYLIRGPGVDEFPEIGLFSIEDHQSGKIYVHRPVDREVTSPFM  
VHFDAVDRSTGKVVDLIFNIRIRDVNDHAPQFPEKEFNISVKESQAAGQPIF  
QLLTVDLQDENTPNSQVLYFLVSQTPLLRESGFRIDLISGEVRLSGCLHYETAP

LFTLIVRASDCGEPSTLSTATIHVSVEDSNNHMPFMEDRYEIRISEGQVEQGV  
LYLPVQDGDSPFTPAWRTQFNIWDGNEEGHFDIVTDPETNQGLLSIIKPLDYES  
QVAHSLVVVVENQEQLFVCTEGQLQPLRKAMASTMVSQVLDTNDPPAFHP  
QSFIVSEEDGAWPAIQLGYFNATDPDRADSQIRYKLVHDPENWVTVDEKSGV  
VTTKKQIDRESPHVNDSFYTIIVHAVDNGLPPLTGTGTMLFLSDVNDNAPTL  
RPHSRHLEVCEASGSQPLLEAEDADLDPYADPFTFDLNAQGDVEETWMLR  
TKQGEHSAELTMLRSVPPGDYLVPLFIADRQGLAQKQTVHVRICSCRSRSGSEC  
EEPSDTWLLWWALSPVGAALMVLSAALLCLLRCSCTFGPKRLRGFIPSDSGH  
QTLIVYNEESKVPQAQGCDFEPRGVKTLSSSTPVYLDRMVPRQQPLQLLEG  
RVVEAWSQKLQSIDVLEGDTGYLPHVYREEGECEGAETLSSLTFLEQDLSPKL  
LGCSGSKSTPSEAMCFTSRVPS

>Nematostella\_vectensis.1

MARIWRFGLATRNIKDQLWMRFVLVLYIHALGFHASSATSEVRTFYIPEGSP  
GTEVGRIPVRVQSILLASGIPADLEYNAGVITTKTVLDREKVSAYNLTFEFST  
PPKSYTVLVYVQDLNDNSPSFVRGTSAKLVVFENDKDFRQKLIIVSDSDFGSN  
STQSYTIVSGNVGNVFKLISKRD TDGDLYADLVVNASSIGVDRERLDSYVLNI  
SASDGGNPANHGFLRLSITVEDTNDNKPEFSNVSYSGTIPENIDVGTSILQVSA  
SDKDIGTNAEIQYSIETHSDPQAIFGIHPTTGIVVNNVRLDYEAKR SYLIVVKA  
EDKGSSHQLSSSAIVRIEVLVDVNDNPNVIHVSYTLGGSYQVTENATIGTQVAR  
VSVSDADSGKNGEVNVTLEGGDGYFSMKFDVLNDESIIAVGQSLDRETHDF  
FLKAVCIDKGDPPRTTEKSFRINVGDVND CAPKFRHTYETRVWENATVNTL  
VAIVNAVDQDFGSNSELVYTIANTTESR SYLHWFAIDPSSGMITTATDL DREQI  
PQVVLTVLVHDRGSPPLSDNCSVIVNLTDSDNDNDPYFNQSSYNASLFENSPSG  
SPVVQLLAQDPDIGENSLILYSILTPNTPFFLDPRKGLVTNSR TL DHEVQSSYTF  
QVAATDGGGRSCNATVHVSLTDLNDNQPVFDPSSYSVEYFENTRIGQSICQL  
KAIDRDSPKFAITRFIIEQGN ADEVFSVDGSGLITLAKLLDRETQDNYLLTVKA  
VDGGGQDSVNKAIVNITVLDVND EPPIFSKAEYNFTIQEHSQALSVIGHVHAIS  
RDKGTNAEVVYSISKGNTDNIVLINSTGTLYLQSEVDHEKIPSLYLT VQAKDK  
GTPPLFGYANVTIAVIDINDNSPQFNSSSILVRLPEDTPIGHTFYTVSVFDADSG  
VLGRVSFSLLSNPGLTFNLD SNTGALS LTKLIDYGNSARSYTLPVQAQDGGSP  
PRSSAMLELKVVVDVNDYSPVFGNWSYTAHVLETT PPD SNII EVVATDVDSG  
ENGRISYAFDSKVDTSKFGLRNGGKIFIKSKLDREDIEEYNLKVIAIDHGTPRR  
SSSADV K VIVDDVNDNPNHFQQASYAFFVKENEPVATYLGAVSASDSDEGSN  
GHVTYRFDTQVAQFIVDKQTGKITTSQVLDREAKASYVFSIVATDGGSSPRVD

KTQVTVIVRDVND CSPKFSKNKYSVTVNEDLPVGSLLTLIATDDDQQGPNS  
DITYMIVAGPKAFSLNQVTGVLTLVSPLDREVTHRHLHVVASDKGGNQSLET  
ITYIEINVLDVNDNYPVFINETTFKTVPEKLPIGSVVA AVLAVDSDQGDNGKV  
RYKIVNGNTDGTFFKINETTG VISTLRALDFEVTNRYVLRVSATDMGKKQQKT  
SYQLVTIYVEDANDNRPTFDKNPIITWIYENVPINTNVTTIKAHDDDSGLNSRI  
WYTIDSQSPRAHFKINSETGLIQTTHPIDREEISEYSLKVRATDQAFTEQDRLY  
NTATLKIIIQDLNDNAPKFVSRNLTYVMEDEPFNFQVTSITALDPDTGQGGNV  
EYRIVSPDTGKFSLDLKTGVLKLGSLDYEDVPQYTLHISATDLGSPPLTSYQL  
FNVVVVDVNDNPPEFTRDLFIGTVSENKPTGTSVVKVTA YDRDSGSNAELTY  
SIPSGVEMDKFSIDKHSGLIVTNSILDREKKD TYFLT VHATGVSYPFRVSSTSV  
RINVM DRNDNPPKFISPVVTLKVPENSPARLIYTLTVQDL DYGNNTKVLYSIM  
SGNTDGAFTIGRSTGELSTTTKLDRETKASYQLSVQAKDITPPYYTAFANITIFI  
EDQNDNPPVFQQSLYSS TISELTPPGTSILNLTASDKDSGSNGNIVYTLSNDTY  
GVYSIDSRTGIVYSAARFETSIKQEYNFFCIAKDQGD PKMAIVPVRIKIEDKN  
NHAPQFTKTPYEVHIFPNTSASALVTMVTATDADTDKSTNGKV TYRLDDSKN  
STSLFVVESNTG SVRTSAGFSNPPQGRHALYIIAEDHGSPPLRGY GIVQIVIGNI  
QDDPPRFLNQTPARVSIPENSKVGSYITTVRARASSDAQVTYSIISGNKGRAFY  
VDPFTGVISVASADALDYESTKNFRLHLVATPQGWVSLNGYMILDINVIDRN  
DN SPAFHPSNMLAQLAEDTGAFKPRFVVKVTA TDVDSGTNGKV TYSIWTGN  
EAGVFTIDSTTGEITAKLLDRETTASFDLVIRGTD SGIPPKSTNCQVKVVVTD  
LNDNPPLFDPLSEVNIRE DTRTGAVVTSVVA TDTDKESRLTYNLKSASTPGMF  
SVGRFNGAVSLLKRLDY EKTNKYSLNIAVSDGLHSAEKTLTINVLDTNDNTP  
KFLNSSYQVTL SKTIPAGRAILRVSATDQDSGSNAQIKYSFPITNSDQIDYKIDA  
DTGVISARRTIDVRIRDSFIQIPVQAMDQGVPPQRALVYVRIIITREP KFELPSYF  
GKVPENAMMGTSVLT VRVTDNAAGLPLGRISYNIENS NYFRIGQRSGVISVN  
KPLDYETKRRFLLVVS AIDDTAPSKPVRVPVYINVS DVNDEKPVFGQSGYMA  
QWSEGIPVGTIVNVNSAADKDSGANGRVWF AIQSGDDKGSFAIDRKTGVIRT  
QRALDHETIKTHHVSVRATDEGSPPMHTDVSVTIRVLDLNDNPPVFRVPGPN  
DVQVLENLPLNSRLYEINATDRDSGANARLSFTVIGGTGQGLFLIDKFSGWLT  
TNITFDYENTAVYQYSLTIKATDAGNPPLSSNITHVNV ADEDEYDPSFNRM DY  
KFDVPGNAKIGDFVGQVTATDRDSGDQGRVFFV FYNPTS NALKMNATTGIIS  
VNRTLNDGSSLETRARRSLDELLIGFEIGSSRSRMRRSAESQELRYTIRAYSGKI  
GSERFADVPASVLVDFTCPGCMVPTTGAREGDPITGTALALIVGLAVLAGVIL  
LAFVVVLLFIYSHRKKRRRTRQNPP LRFDG SFDEITVHPRTTGNANYVSAESISP

RAFPAEYSPLSRNTDSNSTPSGTDASDTPGSSGSASSGRGSSEGGDFDEQPVAIV  
NADIGSFHSDNNAKTIVADSGIQQDDDDQISQLTSLSDGSGILHVDTLNGSESKS  
DKTDKILARLEFQSVESMHVFGEEGGGEADGGHDVGNLLYAKLAEADADDE  
SIVDGRPSYIDEGHDHPSYGGSLSSIIGSQEELTGSYNWDYLLDWGPQFQPLAE  
VFLEIGRMKDEGGDKKEVTRNGSIPSSSRLRPNLSGIATVDMLSSMSSLPRSPV  
SPPSTQYSSPAFSPNFTPAITPLITRSPSVSPLDTGNVSPAYASRGVTPNGSRPTS  
THIVKLQNEDDAYSELSHSPSISDNESNAEIDV

>Branchiostoma\_floridae.1\_bfl\_jgi|Brafl1|120347|estExt\_fgenesh2\_pg.C\_430149\_e\_  
7e-13

MFSAIIRCLGSGCNGFKGIGIKIRTQQVKTRGCTRVVKSQVQMRRLITVAGPLN  
SGVQSVHNLVVSATDGGGLVSQVNANVAVSVIGTGEMPPVFSQARYSFSVPE  
DAARQHTVGTVMASHSDPGKTDPTIYSIHSGDRQGYFAIDPTTGRIYTQLNLD  
HETVSSLLLNIQASSGNPPVYGRAQVNITILDINDNRPEFTVATESVAITENVSP  
GTIIFVASAQDQDAGSNGLVRYSLNNDNLFSVNSISGEVKILRSVDADDDN  
PLRYELKIMAHDQGTPQRFSNLTLVIIQDENDNGPMFSPTFYDVQVPESASV  
NYRFLQVTALDRDSGLNEFITYYLSNSADSPNFGMFPDGWLYVKHRLDREL  
DSYFLQVVARNDNGSPPRNATANVRVTVTDDNDNDPRFTQESYHFSLVENLPT  
GTTVGTVFAVDADIGNNGDLDFSIIPNNSFIITGHQRGVIKTKRPLDRETTA  
RYDLVLKVRDRGTTPRTATATLHIVVEDMNDNAPYFHSQYLGEVEEHQP  
NGTEVIRVLADDPDNGENGTITYRLVTSTPGMNGEEMFNIHSQSGLITTNAPL  
DREQKPTYVLSVAAVDGGTTPRERTTFVHHVTDSDNDNAPVFNSTISIEVEE  
GLEAGSTIGSVHALDNDEGENGRVSYEIMQGNLYGTFGVDRNTGRIFTAKEL  
DFELNARYRLIVQAQDNNARSQKSSTIYVNVNVIDINDNAPTFRSDPVMFGLQ  
ENTAVNSTVWTFSATDVDSGRNGAVRYRIMDQLPNGNFRIDSVTGALQTTT  
PIDREQTSQFTLVVEATDQPVNLSHARTKTTTARILVEDVNDNTPVFSRTET  
YVMEDEPVGYHVMYVIAVDDDDFGDNGRVTYQIVSGNQGGKFLLDPNGLL  
AIERRLDRETESRYVLNITATDHGTPSRASHLITIHVRDVNDNQPRFLQDTYQ  
ASVSENQSPGTSVIQITALDADAGTNGVLTYNIPRGVAEDRFTIEEQTGVRTA  
FRLDREEKDSYIVTAYARDGAYPSRFGFTSVVVSVLDTNDHAPVFKDAEYM  
MTVPENQPNYGVIIHTVVAYDADIGTNGQVRYEIIDGNVGGKFAVDAVTGELS  
VISDQALDRETVPYHLIVQAHDNTDAPRTSTTNITVAVSDENDNNPIFTDPSY  
QQTIQEDVSVGSTVIRVTAQDRDEGVNGEVFYFLSNETNGMFRIDNTSGIITTT  
RLLDREKQSVYSFDAYASDRGPFGRPTSNVRVTVDISDVNDNAPVFTQVPFET  
TIERNIGVNQQVVTVAEDKDTGSNAEILYRFDSSNANSQKFNIGPQSGIITQ

VSLVGDSANIFRLQVIAEDQGSPAQSSTGLVVITMSDSSMTTLRFDNGTYSAYI  
SENAIANTDIISVSASREDGQPASVTYSFASGNDDSEFEINPTSGLITVKDSTNL  
DFETAQRVRLIVTAQATTPSLYGYATVWVNLRDENDNAPRFDQDRYTTSVW  
EGNDRGMFVIQVSATDADSGTNSEVQYSIVSGNHDNAFVIDRDRGIISTNVRM  
DREVRDSYRLELRAVDKGTPLRTGSATLRISVVDINDNRPTFPEPYPPVNVLE  
GAEVGSELALVTANDIDTDPITITYTFTTHGNPGGVFSIDRYSGKVTLAQPLDR  
ESVQSYIITIMASDEVHTDQTNVEINVLDENDNPPVFDQQTYQVDIAEMVPPH  
YSVATVTATDRDAGSNAEITYSMTVAPVEGFYVDPRNGTIFTNKIEINRMQS  
TIQLVIEARDHGVPSLASVVAVRIQVNDINNHAPQFTAGQYEEHVSEAAPRGT  
TVATVTATDADQSHDNSNIHFGIVQGNEDGKFQIETIEPSNSDQYMGKIILFQ  
AIDREEVPMYTLRVLASDRGTPERNSTVTYVVLVDDVNDHSPIFNSTQYVAQI  
SEEAVIGAFVVRVFAFDADSGPNADIHYEITSGNDDSLFAINSQSGVITVANPL  
DYDTVAQHNLTIKAKDSTSDGAKHTITSVLINLIDENDNPPDFPVLMYLEDVP  
EGRPVGTLVFTAARDKDAGIYGTLVILDRDVTNDGTSVAQGKDAFEID  
SSTGEVRTREVFYETQNTYGFYIRATDTGGLSTDVQVGVSIQSVDEFPPVFT  
QDNYIFTVIANADVGTFFVGQVEATDADGGPDGIVSYSIRNDKFAINESGVITV  
KASLLEGNTVTDPSRRKRRQAENEDQINLIVEASSGRPGSLSEQKAISVKIDRS  
CPGCNPSAQSALSPLTPLSLALILIFALIAVILCVVLIVLKFRRKQRPPTSFDG  
SFDTVVVQNTHSFGRDGSQKQSQQLRMFKGHPFATADNSADMGTLTRTDIS  
EHSNNSQSSGRGSSEVDEDEEIRKINETPASISPSNSDQHKVREIPDSGIQHDEDA  
MSEMSVKDTADLISRLAVTSNQGSQINTMISKSVESMHVFRDEGGGEAGGD  
MDIGNLIHQKLHEVGMEENEAIMDGTRDFVLIDDGQPSVAGSLSSIVASEEEL  
RGSYNWDYLLDWGPQYQPMADVFLIEIAKLKDETVAKRQIHHPKSAFTPKVR  
THPPPLITNLPQSSVSTIAPIALGGSSRTSQATSISLPRSPISHESTFTSPALTPSF  
SPSLSPLATRSPSVSPLVTGPNNGASTPHRRSAYSSTFMTRVPSPTGSEQELRI\*  
>Ornithorhynchus\_anatinus\_Cdh9\_oan\_XP\_001508795.2\_e\_1.1e-59  
MKTCYCLTLCIWTCLHTVHPTQLQERIPWYSQPPRIVGLSGNDKQVLHHRV  
KRGWMWNQFFLLEEYTGTDQYVVGKLHTDQDKGDGNLKYILTDGAGSLF  
VIDENTGDIHAAKKLDREKALYVLRAKAIDRKTGRQVEPESEFIIKIHDINDN  
EPKFGQDVYTASVPEMSAVGTSVIQVLATDADDANYGNSAKIVYSILQGQPY  
FSVDPDSGIIKTALPDMSRENREYQVVIQAKDMGGQMGGLSGTTTTVNITLT  
DVNDNPPRFPQSTYQFRCLSVPLGTSLGRIKANDPDLGSNAEMAYGVTEGD  
GADLFEIITDKDTQEGILTVKKQLDFENKMLYALKAEVRNTHLDRPFYHLGPF  
KDTALVKIFVDDIDEPPVFSNNSYLLEVHEDAKEGSIIGQVTARDPDAIKNLIK



YSVDRHSDMDRMFNIHSGNGSIFTLKSLDREASPHWNISIIATEINNPKQSSHV  
PVFIRILDINDHAPEFSRYEYTFVCENAKPGQLIQTISVMDKDDPPQGHRFFFES  
VPEFPLNPNFTIVDNKDNTAGILTRKDGYSRGQMSVYLLPVLIFDNDYPIHSST  
GTLTIRVCSCDRRGNVRSNAEALILSAGLSRGALIAILLCIVILLVVLVFAAL  
KRQRKKEPLIISKDDVRDNIVTYNDEGGGEEDTQAFDIGTLRNPEAREESKLR  
RDVIPETIYQIRRTAPLWENIDVQDFIHRRLKENDTDPSAPPYDSLATYAYEGN  
ASIASSLSSLESLTVDGNQDYGYLGEWGPRFKKLADMYGGEDSDQD

>Ornithorhynchus\_anatinus\_Dsg4 oan\_XP\_001515314.3\_e\_3.6e-12

MVQAVKSEFFVEVREEDNENGTAKWHTVRRQKREWIKFAAACREGEDNSK  
RNPIARIRSDCEVNQKITYRISGVGIDRPPFGVFTVDSRTGEINITSVVDREITPM  
FLIYCRALNSRGEDLESPLRLVKVMDINDNPPVFTQNVYTAGIEENSPANTL  
VVKLSATDADEENLNLSKIAFKIISQEPAGAPMFI LNRYTGEIRTMNFLDREQ  
HSSYNLLVRGSDRDGAPDGMSTQCDCRIKVIDINDNFPTLEETSYSASIEENCL  
NSELLRFRAIDLDEEYTDNWLADFFFVSGNEGNWFEIDTDPRTNNEGILRVVK  
MLDYEQMPNMFVVSIGVKNKAEFHPSVASQYRIQSTPVRIRVINVREGAIFNP  
SMSFSIRDGIRGDALLNYVLGTYTATDLDTGIAAKNVRYVMGHDAGSWLKV  
DSRTGEIRFSKEFDRKSKYIHNGIYTAELLAIEDGSGRTATGTICVEVPDISDYC  
PVIFSDRSVCGASPSAIIIRDVNDYSFGSPFTYCVADQPQGTATLWEIRSINA  
TAAILSTGQLLSSGSYQIPILVKDSLDRTEMPQILQLDVCECDVNQMCLFYST  
TGIYAGGTGITMITDDGYGTITDDRVGESNSGLGPAGIGLIALGLLLLLLSPLLL  
LICCKRRTPADMGRFAPVPEGGEGVIQSWGIEGAQPEDQDVSNICVPMTAS  
NTQERMDSSEIYTNTYAGGGIVEGGISGIELNTGAGEAMGLGAAGYSGTTRR  
RSSTMGTREFEAETGVNMAFLDSYFSEKAYAYADEDEGRPANDCILIYDHEG  
VGSPVGSIGCCSWIADDLDDDYLETLGPKFRTLAEITLDEIEPFPSPHQAWMP  
ISTDLPLLGSYVNVSESSAMSLTEAGLRAEMAMPESMFHGDIIVTESYTTSD  
QCLQPTTIVFDPHLASNVVVTETMLAPAYGVQGNLCPVEANNTNVIYTER  
VDHVAGMSSSSMTGGGTGDCEVIGPEIHVNQMVDPLHVVPDIHISHMVSP  
DIHVSQTIGPGSPLATHRRITQYSTIQYAAQ

>Ornithorhynchus\_anatinus\_Dsg1 oan\_XP\_001515334.3\_e\_2.1e-12

MDWLPCRTTAVLFIFMVVVVEVNSNFQIQVRDYNKNGTIKWHISRRHKRE  
WIKFAAACREGEDNSKRNPIAKINSDCSANEQITYRISGVGIDQPPYGVFIVNP  
KTGDINITSIVDRELTPFFTIYCRALNSRGEDVERPLELRVRLDINDNPPVFSQ  
TEFVGGIEENSYPNTLVMTLNATDADEPNLNLSKIAFKIISQEPAGAPMFI LN  
HTGEIRTMNSNSLDREQQSSYSLVVQGADRDGASDGQSSQCDCRIKIIDVNDNF

PYLEQSSYSVSI EENILNSELIRFRAIDLDEEFSDNWLAQFFFISGNSGNWFEIVT  
DSRTNEGILRVIKPLNYEDAQSMVLSVGVNRNVAEFHHSVRSQYRVQGSSITV  
KVINVVEGSVFTPASKTFILQRGMGANS LIGSYQAIDLDTGRPSTTVRYIIGSNP  
GDLLAVNSRTAEITFKRQVTREIYSQVNGRYVGTILSIDDAQRTCTGTIVLDL  
NDVFDINDSNNSGGQAGGQGSSTGGGGPGGP GGPEGTATVGPSGFTDSSFQG  
SSTSGGSDKDTNTESPGYDGGRGNGKAYFGPAGIGLLILGFLMLLLVPFLMT  
CDCGGASAVGGGFQPVPECTPEGAIHSWAVEGPQPEDRDITNICVPMTTTNE  
GMDTCGVYTNEYGGREVRDIGGGGMGGGASGLEMTTG VKT SVVPEVCPGH  
SGTLLRNSMMDYREGGVNSNFVKNYFCQKAFAYADEDEGRPSNDCLLIYDIE  
GVGSSAGSIGCCSFIGEDLDDSFLDTLGPKFKRLADISMGKDVESFTETEHQW  
TTESAEPSYPSQGPDTLVNGCPPVPPFGTTTVVSETTYPSGPGVQPATPIPDPL  
GYGNVTVTESYTTSGMTLQPSAHVHDPRHGSNVVVTERVLGPMSGDFHGM  
LDVPNLRDSSNVIVTERIIAPNSRLPNTLTLPDPRDSSNVVVTERVIRPSSGLMG  
NINIHPELSGAHNVIVTERVVSGAGTTS GGLGGGSLIDTSMGGGMSLSGGTL  
GMSGVGGGSSGLSGAGMSGSATIGHMRTSDHFNQTIGSASPSASRSRITKYST  
LQYSK

>Ornithorhynchus\_anatinus\_Cdh18 oan\_XP\_007653688.1\_e\_1.1e-57

MRITSTSCLCPVLVCLCFVQRCHGTAHSSIKATGNQTKHVEGETEVHHRPK  
RGWVWNQFFVLEE HMGPDPQYVGKLHSNSDKGDGSVKYILTGEAGTIFIID  
DTTGDIHSTKSLDREQKTHYVLHAQAIDRRTNKPLEPESEFIIKVQDINDNAPK  
FTDGPYIVTVPEMAEMGTSVLQVTATDADDPTYGNSARVVYSILQGQPYFSV  
DPKTGVIRTUALHNMDREAREHYSVVIQAKDMAGQVGGLSGSTTVNITLTDV  
NDNPPRFQPKHYQLYVPESAQVGS AVGKIKANDADTGSNADMKYTIINGDG  
AGIFSISTDKETREGILSLKKPLNYEKKKSYILNIEGANTHLDFRFSHLGPFKDV  
TMLKIIVGDVDEPPLFTKPSYIMEVYENAKIGTVVGTVTAHDPDSANSLVRYF  
IDHNPKE DRYFSIDANTGTIRTTKVL DREETPWHNITVAASEKDNLGLLSHVA  
VGIRVLDVNDNPPELAMEYDVVVCENSKPGQVIHTISA VDKDDFANGPRFHF  
FLDESHSVNPNFTLKDNE DNSASILTKRRRFSRTSQDVYHLPVVIADGGLPSLS  
SSCTLTIRVCACERDGRVRTCHADAF LSSAGLSTGALIAILLCVVILLAI VVLF I  
TLRRSKKEPLIISEEDVRENVVTYDDEGGGEEDTEAFDIAALRNPSAAEELRY  
RRDVQPDVKPPTPPPSEPHRPSPHLGGLDVQEFIRRLAEADVDPSPVPPYDSL  
QTYAYEGRRSEAGSISLDSATTHSDQDYGYLGDWGPEFRKLAELYGDIESER  
TT

>Ornithorhynchus\_anatinus\_Cdh12 oan\_XP\_007653690.1\_e\_2e-59

MLTRNCLSLLLWVLFHGGLLTPLQPLPPQTSAAADSRENVIAMSGRPLPAQRV  
KRGVWVNQFFVLEEYMGSEPPQYVVGKLSLSDLDKGVGSKYTLSDGAGTIFT  
IDETTGDIHAIRSLDREEKPFYTLRAQAVDIDTRKPLEPESEFIIKVQDINDNEP  
KFLDGPYVASVPEMSPVGAYVLQVKAMDADDPTYGNSARVVYSILQGQPYF  
SIDPKTGVIRTUALPNMDREVKEQYQVLIQAKDMGGQLGGLAGTTTNNITLTD  
VNDNPPRFPKSIFHLKVPESPVGSAIGRIRAVDPDLGKNAEIEYNIVPGDGGN  
LFDIITDENTQEGVIKLLKPLDFETKKA YTFKVEASNLHLDHRFLSVGPFKDT  
ATVKISVLDVEEPPVFSKGLYTMVEYEDTPVGTIIGAVTAQDLDLGSSAVRYF  
LDWKNDGDSYFTIDATEGTIATNELLDRESASQYNFSIIASKVSNPLLTSKVNV  
LINVLDVNEFPPEIFVPYETTVCENAKPGQVIQLIGAADRDLSPAGQLFSFRLSP  
EATLKNFTVHDYKNNTAGVETRRNGYSRRKQELYFLPIVIEDSSYPVQSSTN  
TMTIRVCRCSDSGTLLSCNVEAIFLPVGLSTGALIAILLCHILLAILVILYVALRR  
QKKKDTLMTSKEDIRDNVIHVDDEGGGEEDTQAFDIGALRNPKVIEENGMRR  
DIKPEPLCLPHQRPPAEDNTDIRDFIHQRLQENDMDVSAPPYDSLATYAYEGN  
GSIAESLSSIDSLATDADQDYDFLVDWGPFRKVLADMFGEEESCNPDKVT

>Ornithorhynchus\_anatinus\_Cdh2 oan\_XP\_007665830.2\_e\_8.9e-58

MCPGKGPRLPLLLLLLLLLLHQAPIEATGEGAF CRTGFPEDEVYNAVLSRGM  
REGQRLNAMFNCCNGDRRVQYASSEPADFRVDEDGVVYAARGFQTPPEQA  
EFTIY AHDVETEEKWQMAIKLTLEPTGMESALPEKSLQERQKIEEIVFPHPQPK  
QTSHLQRQKRDWVIPPINLPENSRGPPQELVRIRSDRDKNLSLRYSVTGPGA  
DQPPTGIFIINPISGQLSVTKPLDRELIARFHLRAHAVDINGNQVENPIDIVINVI  
DMNDNRPEFLHQVWNGTVPEGSKPGTYVMTVTAIDADDPNAQNGMLRYRI  
LSQAPNTPSNMFTINNETGDIITVAAGLDREKVQQYTLIIQATDMEGNPTYG  
LSNTATAVITVTDVNDNPPEFTAMTFYGEVPENRVDVIVANLTVTDKQDQPH  
PAWNAIYRITGGDPTGRFAIQTDPNNSNDGLVTVVKPIDFETNRMFVLTVA AEN  
QVTLAKGIQHPPQSTATVSVTVIDVNNENPYFVNPVKLVRQEEGLRAGTMLTTF  
TAQDPDRYMQQNIRYTKLSDPANWLKIDPINGQITTVAVLDRESPNVKSNMY  
NATFLATDNGIPPMSGTGTLQIYLLDINDNAPQVLPQEAETCETPDPN SINITA  
LDYDIDPNAGPFAFDLPTNPATIKRNWTITRLNGDFAQLNLKIKFLEAGIYEV  
IITDSGNPPKSNTSILRVKVCQCDSDNGDCTDVDRIVGAGLGTGAIHAILLCHILL  
ILVLMFVWWMKRRDKERQAKQLLIDPEDDVRDNILKYDEEGGGEEDQDYDL  
SQLQQPDTVEPDAIKPVGIRRLDERPIHAEPQYPVRS AAPHPGDIGDFINEGLK  
AADNDPTAPPYDSLLVFDYEGSGSTAGSLSSLN SSSSGGEQDYDYLDNDWGPR  
FKKLADMYGGGDD

>Ornithorhynchus\_anatinus\_Cdh22-like oan\_XP\_028905409.1\_e\_3.9e-40  
MALRPARPAFLARVPLTLGLVLFYYCFSIGITFYNKWLMKSFHFPLFMTLLHL  
AVIFASSALARTALSRFQARARVVLGWPDYLRRVAPTALATVLDVGLSNWSF  
LYITVSLYTMTKSSAILFILMFSLIFRLEEPRAGLVLVVVLVAAGLFLFTYKSTQ  
FDADGFALVLAASFVGGARWTLTQMLLQKAELGLQNPIDTMFHLQPLMFLG  
LFPLFAAVEGLPLSTSRKLFRAEGAGALAGVLCALLGGGLLAFGLGFSEFLV  
SRTSSLTSLIAGIFKEVCTLLMAAHWLGDQINLLNWLGFACLSGISLHVTLKA  
LSAKGEPDPRTPKGAHADPDLELLLWSREDDDDDDPEDEDGPPRDRGGGEA  
AGARFMLWVSEREPFYSLLSRPSKQLHEAAVGPAPAAGESSRGPLVPPQP  
LDFEAQASHTLLLEAANKYLDPRFSGRDQAVVRVTVDVDEPPEFRPPGGPL  
EVAEDARVGLSVATVTALDPDATNSPIRYAIDPASDSERIFDIDAYTGAVVTG  
KGLDRETAGWYNITVLAMEADNHAQISRAVLRQILDVNDNPELTAPFEVA  
VCEDAQPGQLIQTISVVDRDEPQGGHQFYFRLVPETGHDADFSLLDIKDNTAA  
LHTRRTGYSRGAGGVFLLPVLVSDGGRPALSSTGTLTVRVCLCDRAGR VHSC  
NATADHPARHRTPARLPGALSALLVALLILTVFALLILTLKRHHKGRGPDE  
DEDTRDNVIKYNDEGGGEQDTQAYDMTALRGLYEPGAAGGEGVPEGLPGVL  
ALLPRGRPPSPEPDFGLFRDLSRKVALADSDPWPPYDALRTYDEEGGASPA  
ATLSPLPSPSSASDPDPDLPFAFLDAWGPRFRPLAALYAGLPPGEDFQGDG  
GQES

>Ornithorhynchus\_anatinus\_Cdh11 oan\_XP\_028906277.1\_e\_7.5e-62  
MKENYCLHAALACLGLLCASQALATEKLNRFQLPLHAHHEMGKEGQVLHRS  
KRGWVWNQFFVIEEYTGPDVVLVGR LHSDIDSGDGNIKYILSGEGAGTIFVID  
DKSGNIHATKTL DREERAQYTLMAQAVDRDTNRPLEPPSEFIVKVQDINDNPP  
EFLHENYHANVPERSNVGTSVIQVTASDADDPTYGNSAKLVYSILEGQPYFSV  
EAQTGIIRTALPNMDREAKEEYHVVIQAKDMGGHMGGLSGTTKVTITLTDVN  
DNPPKFPQSVYQMSVSEASVPGEEVGRLKAKDPDIGENGLITYNIIDGDGVDM  
FEITTDYETQEGVVKLKKPVDFEAKKAYSLKVEAANVHIDPKFISNGPFKDTV  
TVKIAVEDADEPPVFLAPSYVHEVQENAAAGTVVGRVHAKDPDAANSPIRYS  
IDRHTDLQFFNINPEDGLIKTTKPLDREETAWLNISVFATEIHNHRHQEAKVPV  
AIRVIDVNDNAPNFATTYEAFICESDQTKPLSNQPFITISADDDKDDTANGPRFIF  
SLPPEIIHNPNFTLRDNRDNTAGVYVRRGGFSRQKQDLYLLPIVISDGGAPPMS  
STNTLTIKVCDCDHNGSLLSCNAEAYVLNAGLSTGALIAILACIVILLVIVVLF  
VTLRRQKKEPLIVFEEEDVRENIITYDDEGGGEEDTEAFDIATLQNP DGINGFIP

RKDIKPEYQYMPRPGLRPAPNSVDVDDFINSRIQEADNDPTAPPYDSIQIYGYE  
GRGSVAGSLSSLESATTDSDLDYDYLQNWGPRFKKLADLYGSKDTFDDDS

>Ornithorhynchus\_anatinus\_Cdh5 oan\_XP\_028907692.1\_e\_5.5e-48

MARPILLLSLIVAGAGARLAGGDGEGAPSGGQRVERAPAPRRLKREWIWNQL  
HIMEEINTPLPHHVGGKITSSVNNKNAKYVLQGPYVETIFKVKEDTGDYIAYEK  
LDREKIAEYHLTALIIDKYTNRNLEPPSNFTIKVYDVNDNVPEFVQKEFNGSVP  
EMSPVGTSVTRVTAVDADDPTVAGHAIVQYTIISGQKYFMVDPTGLISTAVN  
DLDREKQSFYEIVVQAKDSPGLYGGDSSTATVKITLTDINDNFPKFTQTRYRF  
NVSEDIRVGNQVDSLTVEDIDEPQNRKTKYNFVQGDYRDTFEIEADALANKG  
IHKAKKPLDYESIJSYKFTVEASDPTIVHHGRQTPHYKSNAEVIIHVLDVDEPP  
VFRPYYVYTLKENIKVNVIGRVVATDPDAEKRTIRYSIRSHSDKGNFFKISKQ  
GDISNTKPLDRETQPWYNLTIEAREINRDGSPTDKESIVQVHIEVLDENDNAPE  
FAQPYEPKVCENAAPGTLVMRISAADKDKMPPGAKFKYSLGTGDSNFTLTEN  
HDNTANITIRFGQFDREKAKVHYLPVVISDNGTPDLTSTNTLVISVCKCNEQG  
EFTFCDEPVKQVGVSIQALVAIFLCILTIIVITLLIILRRRQRREAKVLRKSGAEI  
HEQLVTYDEEGGEMDTTSYDVSVLNSVRKNGLKPPRPALEARPSLYAQVQ  
KPPRHVNAGTGEMAVMIEVKKDEADHDGGGPPYDTLHIYGYEGAESIAESLS  
SLGSDSSSSDIDYDFLNDWGPRFKMLAELYGSEARPKVGY

>Ornithorhynchus\_anatinus\_Cdh8 oan\_XP\_028908032.1\_e\_1.3e-59

MSERLVVMLLDLWTPLMLLWITVVPQMSMAPLNHSQLLPTDSNVELDGLID  
DQRVLNRSKRGWVWNQMFVLEEFSGPEPILVGRLLHTDLDPGSKKIKYILSGD  
GAGTIFQINDITGDIHAIKRLDREEKAEYTLTAQAVDWETSKPLEPPSEFIKVVQ  
DINDNAPEFLNGPYHATVPMSVLGTSVTNVTATDADDPVYGNSAKLVSIL  
EGQPYFSIEPETAIKTAALPNMDREAKEEYLVVIQAKDMGGHSGGLSGTTTLT  
VTLTDVNDNPPKFAQSLYHFSVPEDVGLGATIGRVKANDQDIGENAQSSYDLI  
DGDGTALFEITSDSQTQDGIIRLRKPLDFETKKSYSYSLKVEASNIHIDPRFSSRGP  
FKDTATIKIVVEDADEPPVFSSPTYLLEVHENAAINSIVIGQVTARDPDVTASPI  
RFSIDRHTDLERQFNINAEDGRVTLATALDRETNMWHNITVIA TEIRNHSQISR  
VPVAIKVLDVNDNAPEFASEYEAFLCENGKPGQVIQTVSAIDKDDPKNGHFFL  
YSLPEMANNPNFTIKKNEDNSLSILTKHSGFNRQKQEVYLLPIIISDSGNPPMS  
STSTLTIRVCGCSSDGVVQSCNVEAYVLPIGLSMGALIAILACIILLVIVVLFV  
TLRRHKNEPLIHKDDEDVRENIIRYDDEGGGEEDTEAFDIATLQNPDGINGFLP  
RKDIKPDQLQFMPRQGLAPVPNGVDVDEFINVRLHEADNDPTAPPYDSIQIYGY  
EGRGSVAGSLSSLESSTSDSDQNFYDLSEWGPRFKRLGELYSVGEDSKET

>Ornithorhynchus\_anatinus\_Cdh20 oan\_XP\_028909513.1\_e\_2.6e-47

MSGVQRWLGLGVSLYVCGLLEPSTVVRPGPAAASLGTPEADGPHPRAKR  
SWVWNQFFVLEEYTGTEPLYVVGKLHSDMDRGDGSIRYILSGEGAGAVFTIDD  
ATGDIHATQRLDREERPQYTLRAQALDRRTGRPMEPESEFVIKIQDINDNEPRF  
PDGPYVATVAEMSPVGTSVIQTATDADDPSTYSSARVVYSILQGQPYFSVD  
SKTGLIRTALMNMDREAKESYEVIQAKDMGGQLGGLAGTATVNISLSDVND  
NPPRFPQKHYQMSVSESAPVSSTVGRVFAKDPDEGINAEMTYSLLEGDGLDA  
FDISTDPDFQVGIITVRKPLSFETKRSYTLKVEGANRHSELRFLSLGPFQDTAT  
VHISVEDVDEPPVFELGTYFVEVPEDVEIGATVRTLSAADPDVTNNSIRYSIDR  
SSDPGRFFYVDITTGALMTARPLDREEVPWHNLTVLAVEMNNPAQIGSVSVT  
VKVLDVNDNAPEFPGFYEAFCENARAGQVIQTLAVDQDDPQDGGQHFYYS  
LGPEAANNANFTLWDNRDNTARVLTRRSRGRQLEQKTFQLPILVADGGRPPL  
SSTGTLTVHVCSCDEHGDVLSCEALGLPASLSPSALIAVLACVFVLLVLLV  
VVLVSWRRRRKRPCVPDDEENVHENIVRYDDEGGGEEDTEAFDIAAMWNP  
ARAAGGMAGGCGDPSPEIASLSGQVAWGGGGVQGYVLAKLHEADADLWAP  
PFDSLQTYVFEGAGSAAQSLSSLHSAAGSDSDQSFDFLTGWGPPFQKLAAMY  
GVSEARGPPW

>Ornithorhynchus\_anatinus\_Cdh6-like oan\_XP\_028909822.1\_e\_1.8e-61

MQTNATNCRHDSNLDPAAKLSSEPRADVRWREDEAGEAALRPSGGGGGR  
RQRRGGRGRTRRAAAALLMPARMRAHCLWLLFWLGQPHSTSSPLPRRISS  
LEEQGPVPAGSLNSHGGQGLSRSRWSMWNQFFLLEEYTGSDYQYVVGKLHS  
DQDRGDGSLKYILSGDGAGDLFIINENTGDIQATRRLDREEKPVYVLRAQAV  
NRRTGRPVEPESEFVIKIHDINDNEPLFSEDVYTATVPEMADLGTFFVQVTAT  
DADDPTYGNSARVVYSILQGQPYFSVESETGIIRTALLNMDRENREYQVVIQ  
AKDMGGQMGGLSGTTTVNITLTDVNDNPPRFPQSTYQFRTPEAPPGTPIGRI  
KAHDADVGENAEIEYRIADGEGSDMFDVSTDQETQEGILMVKKVLDFEKRR  
AYSLRVEASNPRTESRFLHLGPFQDATTVRVAVEDVDEPPVFGRRAYILQVRE  
DAPLNSTVGSVDAQDPDGAKNAVRYSVDRHTDMDRIFNIDSVNGTVFTSKPL  
DRETLQWHNITVIATEIGNPRQSSRVPLFIKVLVDVNDNPPQLDQAYETVCEK  
ATAEQLIQTLAVDKDDPHGGHQFSFSLPPEAVNSANFTVQDNRDNTAGIFTR  
KNGYSRHEMSAHFLPVVIADGEHPAQSSGTVTVRVCACDRHGNMQSCSAE  
ALVHPAGLSTGALMAILLCGVILLVTVVLFAALRRQRKKEPLIISKEDIRDNIV  
SYNDEGGGEEDTQAFDIGTLRNPEAIDDKKLRDIVPEALLPRRTPAVRENT



DVRDFINQRLKENDLDPGAPPYDSLATYAYEGSGSVAESLSSLGSVTTDGDQ  
DYDYLSDWGPRFKKLADLYGGADSDRGS

>Ornithorhynchus\_anatinus\_Cdh10 oan\_XP\_028909918.1\_e\_2.9e-60

MTTPRVPLLLLWIGLPHLCSTEMFFRRVSEHQAKVLMAHSPASDGKVLHRQ  
KRGWMWNQFFLLEEYTGSDYQYVVGKLSHQDKGDSGLKYILSGDGAGTLFI  
IDEKTGDIHATRRIDREEKAFYTLRAQAINRRTL RPVEPESEFVIKIHDINDNEP  
TFPEEIYAASVPEMSVVGTSVVQVTATDADDPSYGNSARIISILQGQPYFSVE  
PETGIIRTALPNMNRENREQYQVVIQAKDMGGQMGGLSGTTTNNITLTDVND  
NPPRFQNTVHLRVPESSSVGTAVGSVKATDADTGKNAEVQYRIVDGDGTD  
MFDIMTQKETQEGILTVRKPLDYESRRLYTLKIEAENTHVDPRFYLLGPFKDT  
TIVKISIEDVDEPPVFSRSSYLFEVHEDIEVGTIIGTVMARDPDSASSPIRFLDR  
HTDLDRIFNIHAGNGSIYTSKSLDRELSQWHNLSVIAAEINNPKETTRVSVFVR  
ILDVNDNAPQFAVFYDTFVCENARPGQLIQTISAVDKDDPLGGQKFFFLAAV  
NPNFTVQDNEDNTARILTRKNGFSRHEISSYLLPVVISDNDYPIQSSTGTLTIRV  
CACDNQGNMQSCSAEALLPAGLSTGALIAILLCIILLVIVVLF AALKRQRKK  
EPLILSKEDIRDNIVSYNDEGGGEEDTQAFDIGTLRNPA AIEDKCLRDIIPETL  
FIPRRTPSAPDNTDVRDFINERLKEHDVDPTAPPYDSLATYAYEGNDSIAESLS  
SLGSGTTEGDQNYDFLREWGPFRNKLAEMYGGGESDKDS

>Ornithorhynchus\_anatinus\_Type III Cdh oan\_XP\_028918106.1\_e\_2e-15

MSSWGQGESLQIDPATGWLYVSHPVSVQVPRIGCRIVATDGGNRSSTMELNV  
TVTGVLPQPPVWEQGDYWISIPENTTRGTRIMTLKAISPFGDPRVTYDLEEGRI  
LEANTPIHFYLPKPNRLDGS AALLVAESLDFETTPFFTLRVRARNLAPVPLASFT  
TVYINVTDVNDNVPFFTSSTYEA AVPEGAKIGTAVVQVLATDFDSDLHGKVVQ  
YVILKDPAGDHQFFTINPRTGVIFSEASFDREEKGCYLIEVQSRDSSES AKPGM  
LGQPNTDRACVRIWVIDVNDNAPAFLQPIYKARIEEDKKRGHAVITVTAKDK  
DEGPSTKLR YQITSGNERGTFDMDRQVGTVFVAQALDYEQERLYRLRLVVS  
GKWESHTEVLIHVVNQNDEAPLFSQKEYHLHVLEELRELPIGILQVFAMDPD  
QEQADQALRYSLRGQGTGGEFLIDEVTGQLSSWKS LDREKRSVWHFLVLATD  
ENGEGLTG FADVVKVDDINDQAPFFLCATDDCFVGHVPEDAPAGTAVLDM  
AAVDLDDPRAGKNAALAYRISHSAQN DTYLDFSVHPTTGTIYTLRKS LDRE  
ERDEYL VVVEVRDGGGLTGTGTATILVSDVNDHAPVFTRDVYTASVSESADP  
GSQVAVVSATDWDEGENAAVTFSILEGDPERKFFMETDRGSRRGW IHLRKKL  
DFERPHERVFNLT LRVEDADFFSLSRCVVQVEDANDHVPTFSPPRYDVPALRE  
DVALGTVIAQVSAVDLDSGPNGRVS YHLQDQPYAGGRFSVDGDGRVKVAGP

LDREAVGQHRLVILAVDEGRPALTG SATVLVTLRDVNDHAPTFEVPYRPVV  
WENTAAPRVVPMNETSP LLYAMDRDSA AHGAPFSFHLLSGTAPFSLRDLHNG  
SALLTALSTFDREVQETFHLPILITDSGDPHLSATHMLT VTVGDRNDHAHAPG  
HLECLVYAFEGNLPTMVLGQVHALDVDVWDEKTYHLEGKASRHFFLNGTSG  
ILSIKEGIPPATYNLEV KVSVDGVWPDVISTVKVIVKEIKEDAIRNAGSIRIPNLT  
AEDFIFQPPGQDSKYNQVKKVLSEIIPVQPENIDLFSVLDHQGQSQGIDIWFAA  
GGSSYYKAEKLN GNVA AAKTQLESLLGVDITQVGIDECANVNC SQGTGCVSS  
SDHSPVPSVVTAGNVSLASITMLNSAQCFCAARESRLSCSTYKTD PCLNGGT  
CVDTELGFRRCRCPVGF RGPECQQTQRTFRGVGYAWFPRIKPCSENHISLEFITE  
ERDALLYNGPVAEVQPGEAEDFIALELRDGVPC LMLNRGSGPLFLQLSPEVN  
VADRHWHHLKIFTNGKKVKLILDHCINASAKEESEKASWGESSHCEVSEEIPG  
SKRFFNIQQPLQLGGVKKFLPYHSAETHLRG FVGCVRNLV VNSKVYDLEQPA  
ESLHSSPGCGVTDGMCGEDGDSPCGPHGTCTGEWSSFSCSCQPGYTGA KCDK  
VLPEWSFGRDSWLRFKLKGPLSAHQTHVQLMVRTRASSGTLLSLASAAGPG  
HIRLEV VNGHFGMDFSLGEEKHTVQLPTPRVDHGQWVLLQLERYAQEFTLR  
VNDGGGDREATLV TGTRWRFEIDQEGVLLGNHLLNHSESD FQGCMRDVQLN  
GRPLLVESKSAGFGLILGSQGVTVGCHSRACSIKPCYSPFHCVDLWRKYECRC  
PAGRVELIDGLTGLKQCSPPPCEPGSCRNGGTCVGRSPEK FICRCLDGFRGKW  
CEISRAKTASPGGLSSGSILAIMGLLVFLALLVS YTVWSQWGRARFQKGEVY  
RVPKKHESREDARGNIFNSNEEGGGEHELISRAADEFK RPRPPGCIPQLSDLS  
PQEPHPGPGKDTQLTCVIHPQPREANLAAASGPDATDSASPGAEEAGSEGQNL  
PGDTLYGVRFGGWGTLAGSPSSLGSPKKVGDVDDD SLKESGSDFDPLKDLYE  
LSEGQL

>Ornithorhynchus\_anatinus\_Cdh7 oan\_XP\_028922565.1\_e\_2.2e-60

MKLGRVEFCHLLQIIGLFLCLSGTNQVELSRSKSKPYFQSGKSRTKRSWVWN  
QFFVLEEYMGTDPLYVGK LHSVDVKGDGSIKYILSGEGASSIFIIDENTGDIHA  
TKRLDREEQAYYTLRAQALDRLSNKPVEPESEFVIKI QDINDNEPKFLDGPYT  
AGVPEMSPVGT SVVQVTATDADDPTYGNSARVVYSILQGQPYFSVEPKTGVI  
KTALPNMDREAKDQYLLVIQAKDMVGQNGGLSGTTSVTVTLTDVNDNPPRF  
PRRSYQYNVPESLPVASVVARIKAADADVGPNAEMEYKIVDGDGLGVFKISV  
DKETQEGIIAIQKELDFESKTSYTLRIEASNKHVDPRFLSLGPFSDMTTVKIIVE  
DVDEPPIFSSRLYRMEVSESTQVGNII GTVAAHDPDSSNSPVRYSIDRNTDLER  
YFNIDANSGVITTA KSLDRETNAVHNITVLAMESQNPSQVGRGYVAISILDVN  
DNAPEFAMDYETTVCENAQP GQVIQKISAVDKDEPLNGHQFYFSLAAEAANN

HNFSLKDNKDNTASILTRRNGFRRQEQS VFYLPVFIVDSGSPSLSSSTNTLTIRV  
CDCDADGVAQTCNAEAYILPAGLSTGALIAILACVLTLVLLVLLIVTMRRRKK  
EPLIFDEERDIRENIVRYDDEGGGEEDTEAFDMAALRNLNIIRDTKSRRDVTPE  
IQFLSRPTFKSIPDNVIFREFIWERLKEADVDP CAPPYDSLQTYAFEGNGSVAES  
LSSLESISSNSDQNYDYLSDWGPRFKRLADMYGPGQDSLYS

>Ornithorhynchus\_anatinus\_Dsg3 oan\_XP\_028924267.1\_e\_1.9e-07

MDWLSSRVVGVLLILTVVLEVNSELHVKVNEEKDLAPWPSIRRHKREWVKF  
ARPIRERDDNSKRNP IATHSDFQEKQHIKYRISGVGIDRPPYGVFIIDENTGAIN  
ITAIVDREEIDTYLINCRAVNDWGQDVENLLVLRVKVLDINDNPPIFSQSVFSG  
QVEENSPTNTLIMAVNATDADEPNTLNSKIAFKIISQEPAGAPMFILNRHTGEV  
RTMTNTLDREQFSSYRLLVRGSDLGAEHALSSDSEIKIEIKDVNDNFPPFQHS  
EYFAQIEENSLSELIRLKVTDWDETFSDNWLAEFFFTSGNEGKWF EIHDTKIT  
NEGILSVVKTL DYEQM QNVQLGIAVKNVAEFHYSVIHQYKIQSTPVKIKIINV  
KEGIVFKPPVKKFTVQRGISGQAFINYILGTYVAIDEDTGRAATSIRYIMGRNE  
GGLLAVDSRTAEIRFVKVVERDSIFIINKTFTA EILAI DESGKTATGTVLVEIPDF  
SESCPIIGIDRKT VCSKLP SIIVTARAPGSNQNQGPFTFSVSNQPPRQLLWTIQAL  
NATAAEVRAQQPLSLGTHSVSLFVKGGQDQNC EASETLTLLVDCDCSNQRCI  
DQGTTPVPTTSLPGGKTS DRKGWKRARLGPAGIGLIILGLLLLLLVPLLLFCDC  
GAGTFPGVGAGFIPVPEDPDGGLHKWGIEGAQPKDKEMGQVCGSTTIVANGT  
ECVENS GEVCTNAYAGGAVVEGASGMEMTTCSRHV T ASGFEVTNGLAGFCG  
TRSRHSTGGTLRECAEESVNMAFLDSYFSQKALACSD EDDVHRVNDCLLIYD  
DEGIEAPKSPTG SVGCCSFIADDLDDSFLDDLGP KFKKLAAISLGLDDENQAT  
QSSMLTPGSQCQALSPHLPCAGSPSPTPCVSVCDPLP MAPVSDPLHQGNFLVT  
ETYTSSGSFCQVPAGTIDSRNMVVTERVFCVPSSRGNLGT SPELSRSRNVIYS  
EEPCSVLI

>Ornithorhynchus\_anatinus\_Dsc1 oan\_XP\_028925097.1\_e\_6.4e-10

MAAAGGASGRSILCLPFLCSVLVLSSFCEACKKVVLKVPSHLQAGTLVGKVD  
LDECLTSANIILSNPDFRVLEDGSVYATNTIRLSSEQKAFTILLSDTQKSEQKE  
LEILLLPQGEKTRIKRQAKNTVLKRTKRKWAPIPCSLMENS LGPFPQQIQQIQS  
DAAQNYTIYYSIGGPGVDKEPFLFYIERDTGDIYCTRSVDREQYESFQIIGYA  
TTPDGYTPEHPLPLLIKVEDDNDNAPYFENQVNSYSVMENC RVGMTV GQVT  
AKDKDEPHTLHTRLKYTILKQIPDTHRAFTIHPESGVITTTNLLDREECHTYQ  
LIVQAQDMGGQPFLRGTGTVTITLEDENDNSPVFTQAS YIAQVEENTVNVEI  
LRLRVEDKDIPNSPHSRANYTILKGNENGNFRITTDPR TNEGVL CVVKALNYE

EIRQMLLVIGVVNEARFSKGGNSRGVTMCTTEVTVNVRDQDEGPECNPPIKVI  
QSKDGLKVGSEIFGYQAVDPETGNSEGLRYQKLSKDNWFEINESTGTLRTV  
KELDRESKFKNNQYNVTVSARDAVGRTCTGTLVVLMEINDNAPRIIQNDV  
IICHPANDFVELKAVDFDEPENGGPPFSFALDNSAIKFWTIEKKTDTTAQLHLRE  
TLKYDNYSPIMVTDHRHGHGKMTPLKVRVCQCTVPSECPRGVQKGGSSSDIR  
LGRWAILAIVLGSALLLCVLLTCVCATAKRTVQKCFPEDIAQQNLIISNTEGPG  
EEVMDANIRLPNQSISICDPVCVGTGGQGIKTGGHQNFEMVKGGGHHTLES  
CKGGGQSMMDTGRYAYTDWHCFTQPRLGEKVYLCGQDEEHKHSEYVLSY  
NYEGKGSAAAGSVGCCSDQQUEEGLEFLVHLEPKFKTLAKTCLKQ

>Ornithorhynchus\_anatinus\_Dsg2 oan\_XP\_028925151.1\_e\_3e-09

MEGRGARLGALLLLLLLLLLLICFDVKGKGLHFEILKSREGKGWRSRTHLGRQ  
KREWITAPVTLMEEEDLSDKNPIAKIQTQDHVQNKNLKVEYRITGKGITKAPFN  
VFNYSKYTGELFVLKLDREKEAMYQLTCVAVDENDHVLEKPLELRIKVL  
KNDNRPNFTESVFGQVEESSPPGTSVMQISATDADEPNTLNSRITYMISRVS  
LQKPFKINNETGEIRTLGSHLDRETQSSYTLTVEVTDLPNGISHPITAQALIK  
ILDVNDNFPKAEEMEYEGTIEENQVNVTVMRIKVTDKDEKSDSNWLANFTF  
VSGNEGNYFQIETDPETNEGIITLVKSVDYEELNIDLSILVTNKAPFHPSLKYR  
PKPISIKIKVKDVDEGIYLNPFQVVHVRESKEETPPLNVIGKFFVAYSRTGKI  
AAKYVKGEDRGGWITVDSVTSEIRFAKAPDYESRFVQNGVYTVKILAIKES  
LPQNTATGTLEIHVVINDNCPKLVDPVKTLCEGEEFVNVTAVDLDDFPNSAP  
FTFTVIDDPPGIANVWIIGHQESNSVLLQPKHLKLGRSQVQLSVKDNQGLNCP  
EKQFLKLTVCQCVSGGGCLYPHRSNVQLGSGAITLMILALLLLLLVPLLLL  
CQCGERTKGFTAITDGPVEMRLWNNEGAPPEDKSLPPVLLDHNETFSRTEA  
RLNITEIDTSAGKGRLTMANGGWEEHAGFVGTINSKMSDGAMKPYEYPGAA  
TVQNEETLRKFLVDKAAA YA EEDQAHTAQDCLLVYSQEENEGSPAGSIGCCS  
FIEGDLDDCFLDDLGDKFKTLAEICSESLHAASRVAGASWSSYDERSRSGAGA  
SSLPGPWAGAETNAEALSQAIAERSSSQVAAALSPPLTLGVRNVTATDAA  
YSGASLQSPRHGAEAHPEALTRQVITETSSSKQAMAFAPSLPETRATRSALAT  
EISYSSSLQPPQPLSEHTTHQVITEISSNQGAAFSPTLPRSPNGNVLVTEKSY  
TSSSGLQPGTLILDSQLPQKLVAESVLAPGSRLVENNIVVTETVVNDCGPVG  
SVLSVQDLADSRVYVVRETESVLTPTSALPLPN

>Ornithorhynchus\_anatinus\_Dsc2 oan\_XP\_028925568.1\_e\_8.9e-10

MATSSSSSSSSSSSSSAGRGRLLRGALRPLPPPLLPILLCLGFLSFACEACKTVT  
LNVPSKLEAEQFVGRVNLEECLKTANLIHSVDPDFRVLEDGVSVYTTNAIVLSS

EektftieltdtqkqdqkkivvllapqiqtpkkrhakekalkrakrrwapiPC  
SITENSLGPFPMFLQVQSDTQQNYTIFYSSGPGVDREPINLFHIERDTGNLYC  
NRPVDREQYECFELTAYATTSDGYSPeLPLPLLIKVEDENDNTPVFTQLIYNFN  
VTEHSRPGTIVGQVCATDADEPDTLHTRLKYQILEQYPSSPRLFSINTKTGVIT  
TASSQLDRERLDKYTMILKVQDMDGQHfGRWSTATTVVCIGDVNDNPPVFT  
KSSYTASVEENTVNVEILRMTVEDKDLINTANWRANYTIVKGNENGNFRIVT  
DPKTNEGVLGVVKSLNYEETRQVLLQVGACNEAPFFRDGTSKTVSMATAAV  
TVNVLNQDEGPECVPAVQFTRVKENVPVgTRINGYSAKDPEskASTGIRYQG  
LSDPKHWFTVDENTGSITTTKLLDREAPGIVNNLYNITVLSKDQSGRSCTGTL  
AVILEDVNDNAPIIPTTYATICKTSLGSAEIWAIDPDEPNNGPPFEFTLGSGSDV  
QKMWSLTRINDTAARLRHRNDPPFGSYIVPIVVKDRLGLASTNTIKVNLcNCV  
TVGECTDRDINTGNGVVAKLGKwAILAMILGAALLGCILFTLICGAAGSKKD  
VKTFPDDLAQQNLIISNTEAPGDDRVCSTNGFSTQATNTCGHVCGGTLGPAV  
KNGGQECFEMVKGGHQTLDSCRgCHQTLDSCRGGHQTLDSCQGGHHTLDS  
CRGGQVETDNCRYTYSDWQSYTQPRLGekVNLcNQDEEHKHAQDYVLSYN  
YEGKGSAAgSVGCCSDRPEEEGLEFLDHLEPKFRTLAEACIKR

>Ornithorhynchus\_anatinus\_Cdh26-like oan\_XP\_028926502.1\_e\_3.8e-07

MCFLQEHHNTSQEEWTTGKIWVSLFKRRRLYGLATEHSVALTIPALGRLA  
FHRSVKQQMYLQLLCGSWVVIKCFEICGWKAfVAPRNPRQFMrgQAVSRRP  
PVLRGPLLLQMLLLLLLQISVLDTLFEVTDNLLKkFGEECLQPLQRsRRRWIIT  
TFELEEEDQGPFPKfVgKLFNNISfSISVKYfINGPGVNEYPEFGLfSIDDDLGN  
IYVQRTIDREKTPYfMVRLDALEKTTGNIVDKSLIFKVGIKDINDNAPQfSEKE  
YNISIKESHNSISIFQVVAVDIDQKNTLNSQVTYLLVSQXPSQKEIRfRIDQNN  
GKIQfSGCLDYETVNLfKLLIQASDNgnPQQTSTTVNVKVEDGNNHAPVFT  
KENHEIQIYKQTSQDVLRLLVQDGDSPhTlSWAAKYKIVTGNEKKHXSIVT  
DPETHQGILNIIKPLDYEIFPKKKLVISVENEDPLfLCERGILRNlTEAPRHttV  
NVELVNRNDPPQfHPAILIVREVEGTNPgKSLGIYKATDPDGYEDNIRYKLAH  
DPAGWVRVNESSGEVVTEKQVDRESpyVnNSIYTIIVHAVDNGVPPETATGT  
LMLFLFDKNDNSPTLISSVDICKMEEMGPIMVKAEDKDLHPfSGPFTFELED  
VSGNIKDTWKLgKYyGHsvELLILKSLPKGIYPVPfNIQDKQGLSNKQTLyVR  
ICfCPDGhACEEQKDPIMGVGGAITVLVCACFLVLAVLLSLLWCHfGSRTK  
GTLVQIPYDEGIQTLIKYNIESEKTLsQVWTDfEDQfSPQPLYSVTEK GKQNTQ  
NSIKGKSSLESKkLFEMINvgDVVMEKLYDISTQDDDTGTyQPHIYMEEGDS  
DRAESLSSQDFSENVLPsDFLESLETkfsALENIYLKSALILRN

>Ornithorhynchus\_anatinus\_Cdh4 oan\_XP\_028926899.1\_e\_6.8e-56

MSPGSGMVLVALSFFGSLTAHNGDLTVRPVCKPGFSEDDYTALVSPNILEGQ  
KLLKVKFSSCSGTKAVHYETNNLGFKVGSDGTVFAAHQMQLPPKQIAFKVT  
AWDRQALKRWDTLVRLFVGEKPLLHTGHKQKGKKSTSLDLLQQPSVTLFPW  
PQHQNSNGLRRQKRDWVIPPINVPENSRRGPFPPQQLVRIRSDKDNDIPIRYSITG  
VGADQPPMEVFSIDSMSGRMVTRPMDREERASYHLRAHAVDMNGNKVEN  
PIDLYIYVIDMNDNRPEFINQVYNGSVDEGSKPGTYVMTVTANDADDSTAN  
GMVRYRIVTQTPQSPSQNMFTINSETGDIVTVAAGLDREKVVQYTVIVQATD  
MEGNLNYGLSNTATAIITVTDVNDSPPEFTATTFSGEVPENRVEVVANLTVT  
DGDQPHSPNWNNAVYRIISGDPSGHFSIRTDVPTNGGMVTVVKAVDYEMNRA  
FMLTVMVSNQAPLASGIQMSFQSTAGVTISVMDVNEAPYFPSNHKLIRLEEG  
VPTGTVLTTFSAVDPDRFMQQA VRYSKLSDPANWLNINATNGQITTA AVLDR  
ESVYIKNNVYEATFLAADNGIPPASGTGTLQIYLIDINDNAPELLPKEAQVCEK  
PNLNVINITAADADIDPNIGPYVFELPFMPSAVRKNWTITRLNGDYAQLSLRIM  
YLEAGVYDVPIIVTDSGNPPLSNTTVIKVKVCPCDENGDCCTTIGAVAAAGLGT  
GAIHAILICIIILLTMVLLFVWWMKRREKERHTKQLLIDPEDDVRDNILKYDEEG  
GGEEEDQDYDLSQLQQPETMDHVLNKAPGVRRVDERPIGAEPQYPVRPVPH  
PGDIGDFINEGLRAADNDPTAPPYDSSLVFDYEGSGSTAGSVSSLNSSSSGDQ  
DYDYLNLDWGPFRFKKLADMYGGGDED

>Ornithorhynchus\_anatinus\_Cdh1 oan\_XP\_028931226.1\_e\_6.7e-54

MGTKRGCFCSLPSLAVSFLLLLIQAAPRQCEEVGGCQPGFSSDSYVFTVLRPH  
LERDQVLGQVSFEDCSGSRRTAYLLEDTRFKVATNGVVAVKHPVWLHNLEM  
SFNIHAWDATGNKLSTKVTLKRAAQHHHHQESSPGEHISKVLLFPQSHSGLKR  
QKRDWVIPPINCPENEKGPFPKNLVQIKSNRDKETRVYYSITGQGADKPPMGI  
FTIERESGWLVTEPLDREKIPKYILQSHAVTSDGKTVEEPMEIVITVTDQNDN  
KPQFTQEVFEQSVVEGSSPGTSVMQVNATDKDDPNTYNAALVYSIVSQDPKD  
PQDNIFTINPTSGMITLLTSGLDRETIPQYKLIVQVADMNGEGLSTTATAVINV  
ADSNDNPPIFDSPVYVGQVRENEVNAEIVRLKVTADVPNTKAWKAVYSVN  
NEDGFFVVTDPGTNEGILKTAKGLDFETKNKYTLYVTVVNEDPFAIELHTST  
ATVTVDVMDENEAPVFVPPVKKVEVPEDFAVGQEITTYEAQDPDKFLQQKIT  
YRIWRDDAKWLEINPDSGLISPRASMDRENIEYVKNNTYTALIVAVDNGNPA  
TTGTGTLTLLTSDVNDNGPIPDPRKMDFCQRDYQAHTIHIIDKDLPPNTYPFQ  
AELTHGAGVNWTLKMNTETRDELTLIPKKSLEVGEYKINLKLTDNQNKDQV  
TTLEVYVCDCEGTVTNCKKIGPIAASSMGVPAILGILGGILALLLLLLLLLLLFV



RRRHVVKEPLLPPEDDTRDNVYYYYDEEGGGEEEDQDFDLSQLHRGLDARPEV  
TRNDVAPTSMSVPQYRPRPANPDEIGNFIDENLKAADSPTAPPYDSLLVFDY  
EGSGSEAASLSSLNSSGSDQDQDYDYLNEWGNRFKKLADMYGGGEDD

>Ornithorhynchus\_anatinus\_Cdh3 oan\_XP\_028931957.1\_e\_1.7e-51

MGLGLLPFAILLQVSGQCAGQEPCPAVFRRTEVTWAVPRSQLEPGQVLGQVS  
PVSCPGQAAVQMSTDDDDHFIVTSSGMVLVNGRVLDLGGYERTFSVYARDAAG  
QEFSTAVTLKSQETSLEKENWTPKSWGPKLLRFSPPRHGLKRQKREWVVPPL  
SIPENGGKGPYPLKLTQLKSNMDKSSKIFY SITGPGADRPPEGIFTIMKETGWLM  
VMQPLDREERDRYHFYGHAVSENGKA VEAPMDIYVTVTDQNDNR PQFTQDL  
FRGAVIEGSLPGTSVMRVSATDADDEINTYNGVIAYSILNQEPKEPHDHMFTV  
DPGTGTIRLIVSGLDREKVAVYNLTIQAADMNGTGLSTTASAMIEITDANDNA  
PNFDPQTYSTEVPENQAGYEVERLSVTDADAPGSPA WNAVYQIVRGDEGGH  
FAVTTDLKSNDGIVTTKKALDFETKNQFTLHIEVTNEIPFVVNLPTSTATVTVV  
VRDLNEPPVFLPPTKAEAVPEDVPVGTRISSYPARDPDKRQNQKLSYRIVSDP  
AGWLAIHPESGDITTRALLDREDVQFVRNNTYKAIVEAADDGSPPATGTGTFL  
MTLLDVNDHGPVPQPQQITVCNHNPVPQVLNITDQDQPPNTTPFRAQLTHDS  
DIHWTA EINERGDAVALSLKKVLT KDTYNVYLTLYDNQDKDQLTVIKATVC  
DCEGYVKVCPEPWKAGFVLPILGIILALLIFLLALLLVRRKRRVKEPLLLPED  
DTRDNV FYYGEEGGGEEEDQDYDITQLHRGLDSRPEVIFRNDV VPTFTPPPLYR  
PRPANPDEIGNFIIENLKAANGDPTAPPYDSLLVFDYEGSGSDAGSLSSLTSD  
ADQDQDYNYLNEWGNRFKKLADMYGGGEDD

>Ornithorhynchus\_anatinus\_Cdh15 oan\_XP\_028931988.1\_e\_6.4e-54

MGISLLVALCLLTQELGFSEGT PPTRFPWRRPAGLSRVKRAWVIPPISVSENYK  
RLPYALVQIKSDKQQPGGVIYSIKGPGVDEEPKGIFSIDKFTGKVFLNAMLDRE  
KNDRFRLKAFALGLGGTTLEDPTDLEIVVVDQNDNRPLFREKVITGHVLEGA I  
PGTYVTKAEATDADDPDTDNAALRYSILEQGGAEIFSIDGSTGEIRTVQVGLD  
REVVG VYNLTLQVADLHGDGLTNTATAVIYIDDVNDNPPEFETDKFSVEVAE  
ATAGVDVVRLSVQDRDLPGSPNWVAKFTIVDGDPEGAFVRTDPKTNEGILS  
VVKPLDHETRERYQLTVSVQNL SPLQASAAQTAPALASVTVKVQDVNEPPVF  
HGNPRRV SMAEGAPAGSEVTTFSASD PDLQQQQQQLSYLKDYDPEDWLLVD  
PHSGRIQTKRTL SHKSPFLKDGWYRAILASDNATPARTATGTL SIEILEVNDH  
APILTPPAGALCREPGQGGGLVLSATDEDLPPHGAPFLFQLHPSFPELSRNWTI  
SPVNMTHAVLRVRPGGQEGLYTLPLLLSDSGQPPQREQLLNVTVCHCGEAG  
GCVPEAAALLSGRAGISLSALVIVLASVILLALILLVATLERFRQRAREKGLL

DGLQDDDVRDNVNLNYDEQGGGEEDQDAYDINQLRHPVAGLPPSPRARPAL  
RRDAPYNFIVPQHPRKPPAGPSDIANFISDGLAVADSDPSVPPYDTALIYDYEG  
SGSPAGTLSSILSSQGDEDQDYDYLSDWGPRFLRLADLYGQ

>Ornithorhynchus\_anatinus\_Cdh24 oan\_XP\_028933163.1\_e\_2.2e-48

MWGLVQLLLAWLGGWGCAGRLGPPARAGDPGEPGTLLLRARRSWWNQF  
FVIEEYAGPEPVLIGRLHSDVDRGEGRTKYLLTGEGAGTVFVIDEATGNIHVT  
KSLDREEKAQYVLLAQAVDRASNRPLEPPSEFVIKVVQDINDNPPVFPLGPYHA  
TVPEMSNVGTSVIQVTAQDADDPSYGNSAKLVYTVLDGLPFFSVDPQTGVVR  
TAIPDMDRETQEEFLVVIQAKDMGGHMGGLSGSTTVTVTLSDVNDNPPKFPQ  
SLYQFSVVETAGPGALVGRLRALDPLDGDNALMAYSILEGDGEGAETFSVSA  
DAHGRDGLITIRKPLDFESRRSYAFRVEATNTLIDPAYLRRGPFKDVASVRVT  
VQDAPEPPAFSRPAYRLAVPENSAPGTLVGRVSAADLDAPASAVRYSILPHSD  
PERCFSIGPEDGAIRTAVPLDREVRAWYNLTVLATELSPAQASRVQVAIQAL  
DENDNAPQLAEPYDTFVCDTAAAGQLIQVWVAVDRDEGGNGSRVTLRSPRG  
TEANFTIQDNRDGSANLLLPPRLAPPRRAAYLVPIELRDGGQPALSSTATVTVS  
VCRCRADGTVAACGPEALLAPAGLSTGALLAILACGATLLALGVLFALRRQ  
KAEALMVLEEDVRENIITYDDEGGGEEDTEAFDIAALQNPDGAAPGPAPAP  
APAPAPPRPPGRRDVLPRARSPRRPRRPPAPADAAQLLALRLREADEDPGVP  
PYDSVQVYGYEGRGSSCGSLSSLGSASEAGGGPGPAEPPEDWGPLFRTLAE  
YGAQEPPAP
